# Supplementary material for: HNRNPA1 promotes recognition of splice site decoys by U2AF2 in vivo
Source: HighWire-hosted journal article supplement (doi:10.1101/gr.229062.117), 2018-04-12
Supplement: Supplemental_Tables.xlsx [file Supplemental_Tables.xlsx]

## Sheet: Supplemental_Table_1
Supplemental table 1. iCLIP mapping statistics
#	Stats	from	bowtie	mappings
#	mapping	algorithm:	mapalgoT4_seVar_rptfilt_tophat_trimalgo2
#	mapping	directory:	tophat_map
#
#	M:	Millions	of	reads
#	K:	Thousands	of	fragments
#	TotalCnt:	total	reads
#	MaxMapCnt:	count	of	fragments	with	10	mappings
#	MaxMapPct:	MaxMapCnt/TotalCnt
#	MappedCnt:	count	of	mapped	fragments,	INCLUDING	MaxMapCnt
#	MappedPct:	MappedCnt/TotalCnt
#	MultiCnt:	count	of	multiply	mapped	reads	but	<	10	mappings
#	UniqCnt:	count	of	uniquely	mapped	reads
#	SpliceCnt:	count	of	uniquely	mapped	reads	at	splice-junctions
#	MultiPct:	MultiCnt/MappedCnt
#	UniqPct:	UniqCnt/MappedCnt
#	SplicePct:	SpliceCnt/UniqCnt
#
Condition	CLIP	Replicate	TotalCnt	MaxMapCnt	MaxMapPct	MappedCnt	MappedPct	MultiCnt	MultiPct	UniqCnt	UniqPct	SpliceCnt	SplicePct
Control	hnRNPA1	1	28.55M	0.25M	0.009	27.59M	0.966	1.82M	0.066	25.77M	0.934	99.89K	0.004
Control	hnRNPA1	2	24.43M	0.23M	0.009	23.60M	0.966	1.62M	0.069	21.98M	0.931	84.86K	0.004
hnRNPA1 overexpression	hnRNPA1	1	8.27M	66.81K	0.008	7.91M	0.957	0.57M	0.072	7.35M	0.928	18.72K	0.003
hnRNPA1 overexpression	hnRNPA1	2	9.10M	83.61K	0.009	8.74M	0.96	0.66M	0.075	8.08M	0.925	20.11K	0.002
Control	U2AF2	1	12.54M	84.65K	0.007	11.75M	0.937	0.72M	0.061	11.03M	0.939	65.02K	0.006
Control	U2AF2	2	12.24M	83.16K	0.007	11.79M	0.963	0.71M	0.06	11.08M	0.94	76.55K	0.007
Control	U2AF2	3	17.38M	0.13M	0.007	16.40M	0.944	1.03M	0.063	15.38M	0.937	93.43K	0.006
hnRNPA1 overexpression	U2AF2	1	28.23M	0.72M	0.025	25.68M	0.91	4.49M	0.175	21.18M	0.825	0.21M	0.01
hnRNPA1 overexpression	U2AF2	2	30.72M	0.63M	0.021	28.12M	0.915	4.10M	0.146	24.01M	0.854	0.25M	0.01
hnRNPA1 overexpression	U2AF2	3	37.20M	0.90M	0.024	33.33M	0.896	5.60M	0.168	27.73M	0.832	0.28M	0.01
Control	SRSF1	1	3.20M	50.91K	0.016	3.04M	0.951	0.34M	0.112	2.70M	0.888	46.27K	0.017
Control	SRSF1	2	2.63M	27.79K	0.011	2.47M	0.941	0.31M	0.127	2.16M	0.873	53.34K	0.025
Control	SRSF1	3	2.95M	45.99K	0.016	2.85M	0.965	0.30M	0.107	2.55M	0.893	41.84K	0.016
hnRNPA1 overexpression	SRSF1	1	3.71M	39.28K	0.011	3.56M	0.961	0.31M	0.087	3.25M	0.913	52.63K	0.016
hnRNPA1 overexpression	SRSF1	2	6.09M	52.81K	0.009	5.90M	0.969	0.45M	0.076	5.45M	0.924	87.76K	0.016
hnRNPA1 overexpression	SRSF1	3	5.18M	49.04K	0.009	5.01M	0.968	0.40M	0.081	4.61M	0.919	74.65K	0.016
Control	SRSF1	1	17.61M	0.34M	0.02	16.78M	0.953	2.16M	0.129	14.63M	0.871	0.27M	0.019
Control	SRSF1	2	13.06M	0.17M	0.013	12.36M	0.946	1.91M	0.155	10.44M	0.845	0.29M	0.028
Control	SRSF1	3	13.55M	0.26M	0.019	13.12M	0.968	1.59M	0.121	11.53M	0.879	0.21M	0.018
hnRNPA1 overexpression	SRSF1	1	20.95M	0.26M	0.012	20.14M	0.961	1.83M	0.091	18.31M	0.909	0.30M	0.017
hnRNPA1 overexpression	SRSF1	2	34.03M	0.33M	0.01	33.00M	0.97	2.56M	0.078	30.44M	0.922	0.50M	0.016
hnRNPA1 overexpression	SRSF1	3	26.69M	0.29M	0.011	25.87M	0.969	2.16M	0.083	23.72M	0.917	0.40M	0.017

## Sheet: Supplemental_Table_2
Supplemental Table 2. Comparison of library complexity before and after PCR duplication removal using random indexes
#	Compare	two	stats	results
#
#	statsDirA:	mapalgoT4_seVar_rptfilt_tophat_trimalgo2/tophat_bam_stats
#	statsDirB:	mapalgoT4_seVar_rptfilt_tophat_trimalgo2/tophat_bam_stats
#
#	statsSfxA:	.ih1.tophat.map.stats
#	statsSfxB:	.ih1.rdcb1.tophat.map.stats
#
#	dataItemA:	MappedCnt
#	dataItemB:	MappedCnt
#
#	M:	Millions	of	fragments
#	K:	Thousands	of	fragments
#	Ratio_AB:	dataItemA/dataItemB
#
Condition	CLIP	Replicate	MappedCnt_A	MappedCnt_B	Ratio_AB
Control	hnRNPA1	1	27.59M	23.25M	1.19
Control	hnRNPA1	2	23.60M	19.70M	1.2
hnRNPA1 overexpression	hnRNPA1	1	7.91M	6.28M	1.26
hnRNPA1 overexpression	hnRNPA1	2	8.74M	6.91M	1.26
Control	U2AF2	1	11.75M	10.16M	1.16
Control	U2AF2	2	11.79M	10.15M	1.16
Control	U2AF2	3	16.40M	14.02M	1.17
hnRNPA1 overexpression	U2AF2	1	25.68M	8.64M	2.97
hnRNPA1 overexpression	U2AF2	2	28.12M	8.80M	3.2
hnRNPA1 overexpression	U2AF2	3	33.33M	10.60M	3.14
Control	SRSF1	1	3.04M	2.36M	1.29
Control	SRSF1	2	2.47M	1.82M	1.36
Control	SRSF1	3	2.85M	2.14M	1.33
hnRNPA1 overexpression	SRSF1	1	3.56M	3.04M	1.17
hnRNPA1 overexpression	SRSF1	2	5.90M	4.99M	1.18
hnRNPA1 overexpression	SRSF1	3	5.01M	4.21M	1.19
Control	SRSF1	1	16.78M	3.88M	4.32
Control	SRSF1	2	12.36M	2.57M	4.81
Control	SRSF1	3	13.12M	3.02M	4.34
hnRNPA1 overexpression	SRSF1	1	20.14M	14.64M	1.38
hnRNPA1 overexpression	SRSF1	2	33.00M	23.86M	1.38
hnRNPA1 overexpression	SRSF1	3	25.87M	18.74M	1.38

## Sheet: Supplemental_Table_3
Supplemental Table 3. Summary of aggregated crosslink data from replicate iCLIP experiments.
#	Stats	by	region	from	coverage	track.
#	mapping	algorithm:	mapalgoT4_seVar_rptfilt_tophat_trimalgo2
#	coverage	directory:	tophat_bam
#	region	file	directory:	/hive/groups/wet/illumina/geneModels/hg19/gtf
#	filter	file:	NONE
#
#	coverage	file	strandp:	SAMPLE_hg19.ih1.rdcb1.tophat.5pOnly.strandp.cov.trk.bb
#	coverage	file	strandm:	SAMPLE_hg19.ih1.rdcb1.tophat.5pOnly.strandm.cov.trk.bb
#	region	file	strandp	cds	:	hg19_knowngene_regions_cds.strandp.bed.trk.gz
#	region	file	strandm	cds	:	hg19_knowngene_regions_cds.strandm.bed.trk.gz
#	region	file	strandp	utr3	:	hg19_knowngene_regions_utr3.strandp.bed.trk.gz
#	region	file	strandm	utr3	:	hg19_knowngene_regions_utr3.strandm.bed.trk.gz
#	region	file	strandp	utr5	:	hg19_knowngene_regions_utr5.strandp.bed.trk.gz
#	region	file	strandm	utr5	:	hg19_knowngene_regions_utr5.strandm.bed.trk.gz
#	region	file	strandp	nc	:	hg19_knowngene_regions_nc.strandp.bed.trk.gz
#	region	file	strandm	nc	:	hg19_knowngene_regions_nc.strandm.bed.trk.gz
#	region	file	strandp	intron	:	hg19_knowngene_regions_intron.strandp.bed.trk.gz
#	region	file	strandm	intron	:	hg19_knowngene_regions_intron.strandm.bed.trk.gz
#	region	file	strandp	intergenic	:	hg19_knowngene_regions_intergenic.strandp.bed.trk.gz
#	region	file	strandm	intergenic	:	hg19_knowngene_regions_intergenic.strandm.bed.trk.gz
#
#	basesCds	:	36.78M	(sum	of	2	strands)
#	basesUtr3	:	32.36M	(sum	of	2	strands)
#	basesUtr5	:	8.14M	(sum	of	2	strands)
#	basesNc	:	11.91M	(sum	of	2	strands)
#	basesIntron	:	1304.43M	(sum	of	2	strands)
#	basesExon	:	89.19M	(sum	of	2	strands)
#
#	covTot:	total	coverage	of	all	regions
#	covCds:	total	coverage	of	cds	regions
#	covUtr3:	total	coverage	of	3'	UTR	regions
#	covUtr5:	total	coverage	of	5'	UTR	regions
#	covNc:	total	coverage	of	nonCoding	regions
#	covIntron:	total	coverage	of	intronic	regions
#	covInter:	total	coverage	of	intergenic	regions
#
#	covExon:	covCds	+	covUtr3	+	covUtr5	+	covNc
#
#	pctCds:	covCds/covTot
#	pctUtr3:	covUtr3/covTot
#	pctUtr5:	covUtr5/covTot
#	pctNc:	covNc/covTot
#	pctExon:	covExon/covTot
#	pctIntron:	covIntron/covTot
#	pctInter:	covInter/covTot
#
#	pxtCds:	covCds/covExon
#	pxtUtr3:	covUtr3/covExon
#	pxtUtr5:	covUtr5/covExon
#	pxtNc:	covNc/covExon
#
#	denCds:	covCds/basesCds
#	denUtr3:	covUtr3/basesUtr3
#	denUtr5:	covUtr5/basesUtr5
#	denNc:	covNc/basesNc
#	denExon:	covExon/basesExon
#	denIntron:	covIntron/basesIntron
#
Condition	CLIP	covTot	covCds	pctCds	pxtCds	denCds	covUtr3	pctUtr3	pxtUtr3	denUtr3	covUtr5	pctUtr5	pxtUtr5	denUtr5	covNc	pctNc	pxtNc	denNc	covExon	pctExon	denExon	covIntron	pctIntron	denIntron	covInter	pctInter
A1 overexpression	SRSF1	29.45M	3.11M	0.1057	0.2592	0.085	3.76M	0.1278	0.3134	0.116	0.60M	0.0205	0.0503	0.074	4.53M	0.1538	0.377	0.38	12.01M	0.4078	0.135	13.59M	0.4616	0.01	3.84M	0.1306
Control	SRSF1	3.99M	0.34M	0.0854	0.1676	0.009	0.66M	0.165	0.3237	0.02	0.10M	0.0255	0.0499	0.012	0.93M	0.2339	0.4588	0.078	2.03M	0.5098	0.023	1.18M	0.2952	0.001	0.78M	0.1951
A1 overexpression	hnRNPA1	1.65M	0.02M	0.0097	0.0397	0	0.13M	0.0761	0.3095	0.004	0.02M	0.0098	0.0399	0.002	0.25M	0.1502	0.611	0.021	0.41M	0.2458	0.005	1.07M	0.6496	0.001	0.17M	0.1046
Control	hnRNPA1	9.82M	0.12M	0.0125	0.0557	0.003	1.01M	0.103	0.4587	0.031	0.11M	0.0111	0.0493	0.013	0.96M	0.098	0.4364	0.081	2.21M	0.2246	0.025	6.36M	0.6473	0.005	1.26M	0.1281
A1 overexpression	U2AF2	16.54M	0.42M	0.0251	0.0677	0.011	3.70M	0.2237	0.6026	0.114	0.43M	0.0257	0.0692	0.052	1.60M	0.0967	0.2605	0.134	6.14M	0.3713	0.069	5.28M	0.3193	0.004	5.12M	0.3094
Control	U2AF2	6.84M	0.25M	0.0363	0.122	0.007	0.68M	0.1	0.3363	0.021	0.11M	0.0167	0.056	0.014	0.99M	0.1444	0.4856	0.083	2.03M	0.2973	0.023	4.15M	0.6065	0.003	0.66M	0.0963

## Sheet: Supplmenental_Table_4
Supplemental table 4. CLIPper output statistics from "pre-mRNA" analysis for aggregated iCLIP data.
#	##############################
#	Statistics	of	CLIPPER	peaks	from	file:	SAMPLE_hg19_clipper_peaks.neglog10pvalGT10.bed.trk.gz
#	mapping:	mapalgoT4_seVar_rptfilt_tophat_trimalgo2
#	clipper:	clipperalgoP2_premRNA_ih1_rdcb1_5p_gt3_ud15
#
#	mapReads:	number	of	mapped	treatment	reads	used	by	CLIPper
#	numPeaks:	number	of	peaks	called	by	CLIPper
#	medTags:	median	number	of	tags	in	peaks	called	by	CLIPper
#	avgTags:	average	number	of	tags	in	peaks	called	by	CLIPper
#	medLen:	median	length	of	peaks	called	by	CLIPper
#	avgLen:	average	length	of	peaks	called	by	CLIPper
#	peakDens:	density	of	tags	per	kb	of	peak	length	(1000*avgTags/avgLen)
#	peakFrac:	fraction	of	reads	in	CLIPper	peaks	(numPeaks*avgTags/mapReads)
#
#	pval0001:	number	of	peaks	found	with	pval	<	0.0001
#	pval001:	number	of	peaks	found	with	pval	<	0.001
#	pval01:	number	of	peaks	found	with	pval	<	0.01
#	pval02:	number	of	peaks	found	with	pval	<	0.02
#	pval05:	number	of	peaks	found	with	pval	<	0.05
#	...
#
Condition	CLIP	mapreads	numPeaks	medTags	avgTags	medLen	avgLen	peakDens	peakFrac	pval0001	pval001	pval01	pval02	pval05
A1 overexpression	SRSF1	19.29M	202511	22	37.1	29bp	28bp	1325.00RPK	0.389	202K	202K	202K	202K	202K
Control	SRSF1	2.41M	22393	23	39.6	34bp	32bp	1237.50RPK	0.3679	22389	22389	22389	22389	22389
A1 overexpression	hnRNPA1	0.68M	5789	19	26.1	33bp	29bp	900.00RPK	0.2231	5789	5789	5789	5789	5789
Control	hnRNPA1	4.73M	59778	20	27.6	35bp	33bp	836.36RPK	0.3494	59775	59775	59775	59775	59775
A1 overexpression	U2AF2	12.92M	125588	26	54.3	14bp	20bp	2715.00RPK	0.5279	125K	125K	125K	125K	125K
Control	U2AF2	2.60M	23918	20	29.5	35bp	33bp	893.94RPK	0.2714	23913	23913	23913	23913	23913

## Sheet: Supplemental_Table_5
Supplemental Table 5: CLIPper output total/gained/lost peaks from aggregated iCLIP data.
baseMean	log2FoldChange	lfcSE	stat	pvalue	padj	position
7.06611	-1.03156	0.629568	-1.63852	0.101314	0.17124	chr1:14819-14843_-
3.17661	-1.53768	0.998029	-1.54072	0.123385	0.200523	chr1:14888-14912_-
1.21372	-2.21149	1.86313	-1.18698	0.235236	0.329229	chr1:15249-15272_-
4.50034	-1.75996	0.854141	-2.0605	0.0393509	0.083663	chr1:15303-15336_-
1.72479	-1.67097	1.47203	-1.13515	0.256313	0.351059	chr1:15789-15814_-
1.10045	-3.27061	2.04044	-1.60289	0.108958	NA	chr1:15884-15907_-
2.24698	-3.17778	1.44936	-2.19254	0.0283407	0.0650589	chr1:16152-16176_-
13.0173	4.64246	0.803722	5.77621	7.64041e-09	6.5968e-07	chr1:16492-16525_-
1.79404	-2.83032	1.54694	-1.82962	0.0673063	0.126016	chr1:18333-18356_-
1.2044	-2.14262	1.86463	-1.14908	0.250521	0.344889	chr1:18492-18515_-
2.31198	-3.28038	1.51972	-2.15855	0.030885	0.0695932	chr1:19368-19391_-
1.86729	-4.05063	1.57663	-2.56916	0.0101945	0.0298739	chr1:21447-21472_-
1.45002	-1.22904	1.6004	-0.76796	0.442511	0.537836	chr1:22232-22257_-
1.82898	-4.0073	1.54002	-2.6021	0.00926541	0.0277092	chr1:22770-22795_-
1.87764	-1.23508	1.31774	-0.93727	0.34862	0.445382	chr1:23944-23969_-
1.60174	-2.62301	1.61112	-1.62807	0.10351	0.173985	chr1:24417-24442_-
1.98241	-3.00423	1.53388	-1.95859	0.050161	0.100882	chr1:24561-24584_-
0.963895	-1.81448	2.17631	-0.833739	0.404428	NA	chr1:24663-24688_-
0.800239	3.53018	2.63513	1.33966	0.180356	NA	chr1:25268-25291_-
3.34073	-3.80515	1.34737	-2.82414	0.00474077	0.0166381	chr1:28795-28820_-
3.18284	-4.79027	1.35718	-3.52958	0.000416216	0.00266232	chr1:99124-99174_-
1.01046	-3.13983	2.14108	-1.46647	0.14252	NA	chr1:122327-122352_-
3.47275	-2.91433	1.20548	-2.41756	0.0156249	0.041306	chr1:136814-136853_-
7.59885	-2.74319	0.787623	-3.48287	0.000496071	0.00303455	chr1:136961-136993_-
2.0383	-4.17026	1.49881	-2.78239	0.00539599	0.0182645	chr1:137017-137040_-
1.36516	-2.40182	1.76487	-1.3609	0.173544	0.260838	chr1:137074-137097_-
1.99998	-4.12725	1.49833	-2.75457	0.00587693	0.0194767	chr1:137170-137195_-
2.19498	-2.23127	1.35369	-1.64828	0.0992943	0.168809	chr1:137219-137244_-
4.66131	-2.2414	0.900641	-2.48867	0.0128223	0.0354425	chr1:137594-137617_-
2.36238	-3.25722	1.43285	-2.27325	0.023011	0.0556764	chr1:138190-138226_-
1.69289	-2.72579	1.66147	-1.6406	0.100881	0.170664	chr1:138990-139013_-
3.47875	1.00998	0.876509	1.15228	0.249207	0.343776	chr1:139848-139882_-
5.18892	0.226338	0.684381	0.330719	0.740857	0.799614	chr1:140270-140312_-
4.71449	-1.19215	0.773224	-1.54179	0.123126	0.200201	chr1:141517-141567_-
2.08044	-3.05928	1.4725	-2.07761	0.0377451	0.0810235	chr1:141724-141747_-
1.22142	-2.15605	1.8684	-1.15395	0.248519	0.34313	chr1:141980-142003_-
1.54203	1.1449	1.43873	0.795769	0.426166	0.522752	chr1:142606-142629_-
2.8236	-3.56801	1.3845	-2.57712	0.00996275	0.0293645	chr1:142792-142815_-
9.9195	-2.34905	0.63298	-3.7111	0.000206363	0.00159338	chr1:142898-142923_-
10.1134	-3.5257	0.817206	-4.31433	1.60085e-05	0.000245121	chr1:143232-143235_-
2.64496	-1.0823	1.07818	-1.00382	0.315466	0.411777	chr1:144276-144309_-
3.48389	-1.6651	0.961945	-1.73097	0.0834571	0.148826	chr1:144419-144444_-
1.63247	-2.64631	1.59615	-1.65793	0.097331	0.166606	chr1:145199-145222_-
1.56962	-2.59684	1.62765	-1.59545	0.110611	0.183438	chr1:145265-145289_-
5.86713	-3.12228	0.969785	-3.21956	0.00128387	0.00616188	chr1:145338-145345_-
1.5591	-1.50237	1.51725	-0.990196	0.322078	0.418522	chr1:145472-145495_-
2.78776	-0.39843	0.969125	-0.411124	0.680982	0.749569	chr1:146198-146221_-
1.12001	-3.29158	1.99043	-1.6537	0.0981882	0.167492	chr1:147404-147427_-
0.501035	-2.1301	3.97351	-0.536075	0.591907	NA	chr1:147652-147675_-
3.63561	-2.2772	1.04187	-2.18569	0.0288385	0.0659003	chr1:147706-147740_-
0.912082	-2.98731	2.35038	-1.27099	0.203733	NA	chr1:148136-148159_-
2.13743	-3.09382	1.46919	-2.1058	0.0352214	0.0771921	chr1:149033-149067_-
3.09254	-2.64936	1.22855	-2.15649	0.0310451	0.0698833	chr1:149486-149511_-
2.98482	-3.6477	1.3724	-2.65789	0.00786315	0.0243672	chr1:149658-149695_-
13.7804	-3.12744	0.644701	-4.85099	1.22846e-06	3.57165e-05	chr1:150215-150228_-
3.08869	-1.94853	1.09539	-1.77885	0.075264	0.137476	chr1:150534-150559_-
1.81128	-0.044853	1.27131	-0.0352811	0.971856	0.980174	chr1:151406-151429_-
3.18799	-2.06189	1.07926	-1.91046	0.0560738	0.110129	chr1:151847-151897_-
1.78937	-1.76987	1.43638	-1.23218	0.217883	0.311184	chr1:152201-152224_-
1.4474	0.353427	1.4865	0.237758	0.812068	0.858221	chr1:152419-152442_-
1.86528	-2.87596	1.51904	-1.89327	0.0583214	0.113229	chr1:153056-153080_-
1.6001	-3.81094	1.61405	-2.3611	0.018221	0.0464371	chr1:153461-153484_-
1.88321	-0.526684	1.23244	-0.427352	0.669123	0.739282	chr1:153607-153632_-
1.11023	-3.28127	2.00083	-1.63996	0.101014	NA	chr1:154716-154741_-
1.98261	-4.09555	1.53035	-2.67621	0.00744593	0.023417	chr1:155613-155637_-
0.510816	-2.15567	3.81762	-0.564665	0.572302	NA	chr1:155697-155720_-
1.0121	-1.79919	2.10955	-0.852875	0.393728	NA	chr1:162022-162047_-
2.31265	-4.32652	1.44336	-2.99754	0.00272168	0.0108402	chr1:162215-162238_-
2.60918	-4.51307	1.42123	-3.17547	0.00149594	0.0069094	chr1:162391-162416_-
2.92501	-2.61874	1.24195	-2.10858	0.034981	0.0768192	chr1:172695-172718_-
1.38253	-2.45187	1.74121	-1.40814	0.159089	0.243796	chr1:172888-172913_-
1.2519	-3.4518	1.88995	-1.8264	0.0677902	0.126727	chr1:172996-173021_-
1.381	-3.59203	1.736	-2.06914	0.0385326	0.0822681	chr1:245445-245470_-
0.599417	-2.39352	3.32817	-0.71917	0.472036	NA	chr1:247794-247819_-
11.5402	-2.56705	0.618463	-4.1507	3.31464e-05	0.000418143	chr1:317805-317817_+
2.24003	-4.29271	1.45262	-2.95514	0.00312525	0.0120865	chr1:317913-317923_+
1.37272	-0.278266	1.55289	-0.179192	0.857787	0.893893	chr1:318723-318730_+
0.468922	-2.04075	3.97773	-0.513043	0.607921	NA	chr1:318844-318851_+
1.67272	-3.8605	1.59324	-2.42305	0.0153907	0.0408423	chr1:318979-318986_+
1.55201	-3.75079	1.64318	-2.28264	0.0224516	0.0547012	chr1:319388-319395_+
2.132	-3.14504	1.46468	-2.14726	0.0317728	0.0712726	chr1:319518-319525_+
3.19151	-0.566626	0.945265	-0.599436	0.548882	0.635874	chr1:321007-321014_+
2.13995	-2.00352	1.36367	-1.46921	0.141776	0.222781	chr1:321315-321323_+
3.67115	-2.30664	1.0558	-2.18474	0.0289078	0.066026	chr1:322090-322099_+
2.60104	-3.41203	1.40384	-2.4305	0.0150782	0.0402204	chr1:322418-322460_+
1.94969	-4.10052	1.50747	-2.72014	0.00652545	0.0211501	chr1:322524-322566_+
8.62692	-4.3455	1.10236	-3.94198	8.08101e-05	0.000802216	chr1:322634-322636_+
2.13243	2.87633	1.40911	2.04124	0.0412267	0.0867852	chr1:322807-322814_+
3.83451	5.79503	1.34337	4.31381	1.60465e-05	0.000245399	chr1:323184-323191_+
1.70965	-3.90944	1.57325	-2.48494	0.0129573	0.0357171	chr1:323479-323488_+
4.90122	-2.78757	0.982659	-2.83676	0.00455739	0.016139	chr1:323535-323575_+
1.11758	0.335427	1.7486	0.191827	0.847878	0.88619	chr1:323888-323895_+
1.19883	-3.39908	1.91586	-1.77418	0.0760336	0.138449	chr1:324197-324204_+
2.42896	-1.69321	1.19557	-1.41624	0.156704	0.24088	chr1:324327-324334_+
7.69017	-1.85733	0.669544	-2.77403	0.00553672	0.0186072	chr1:324433-324456_+
2.1258	-3.11545	1.47507	-2.11207	0.0346801	0.0764459	chr1:324716-324723_+
0.771946	-1.43608	2.56322	-0.560264	0.5753	NA	chr1:325044-325051_+
3.28906	-3.78831	1.3562	-2.79333	0.00521677	0.0178126	chr1:325907-325944_+
3.00907	-1.49521	1.02195	-1.4631	0.143441	0.224721	chr1:326119-326126_+
4.31311	-2.10214	0.917101	-2.29216	0.0218966	0.0537731	chr1:326518-326527_+
2.00137	-4.1287	1.48979	-2.77134	0.00558265	0.0187266	chr1:326891-326898_+
1.36144	-3.57586	1.79342	-1.99387	0.0461658	0.0944841	chr1:326988-326995_+
1.13675	-2.02152	1.96462	-1.02896	0.303496	0.399213	chr1:328297-328304_+
0.942809	-3.03091	2.46136	-1.2314	0.218174	NA	chr1:333448-333455_+
1.29765	-1.30614	1.85388	-0.704544	0.481094	0.576123	chr1:340972-340979_+
0.77042	-2.74627	2.68224	-1.02387	0.305897	NA	chr1:358742-358749_+
12.3281	7.46959	1.22953	6.07515	1.23873e-09	1.48527e-07	chr1:565085-565087_+
12.6673	7.51218	1.2287	6.11394	9.72028e-10	1.22085e-07	chr1:565088-565093_+
7.11836	3.74769	0.862347	4.34592	1.38693e-05	0.000220619	chr1:565691-565720_+
24.4526	2.56829	0.3847	6.67608	2.45422e-11	5.56839e-09	chr1:565782-565811_+
45.3063	0.821912	0.286665	2.86715	0.00414188	0.0150041	chr1:567953-567981_+
11.744	5.50434	1.08319	5.08161	3.74247e-07	1.44517e-05	chr1:569703-569741_+
1.03075	3.88784	2.1676	1.79361	0.0728751	NA	chr1:569968-569991_-
5.01325	-0.0123462	0.697535	-0.0176998	0.985878	0.989974	chr1:570001-570005_+
7.29707	0.514536	0.574524	0.895587	0.370473	0.467306	chr1:570016-570023_+
0.510816	-2.15567	3.81762	-0.564665	0.572302	NA	chr1:630921-630944_-
1.45515	-2.51716	1.70051	-1.48023	0.138811	0.219377	chr1:648666-648691_-
2.84271	1.84251	1.00977	1.82469	0.0680483	0.127118	chr1:661252-661277_-
2.00509	-3.02127	1.50036	-2.0137	0.0440407	0.0911718	chr1:661469-661492_-
3.08226	-4.75782	1.3842	-3.43724	0.000587675	0.00344824	chr1:661660-661689_-
1.6001	-3.81094	1.61405	-2.3611	0.018221	0.0464371	chr1:661940-661965_-
3.86643	-3.06659	1.18704	-2.58339	0.00978335	0.0289289	chr1:663083-663105_-
3.35747	-2.79314	1.20365	-2.32057	0.0203103	0.0506046	chr1:663472-663506_-
2.07565	-2.13777	1.37698	-1.5525	0.120543	0.196642	chr1:663685-663710_-
2.11616	-2.15887	1.36702	-1.57925	0.114279	0.188255	chr1:664478-664501_-
1.55506	-1.65697	1.57499	-1.05205	0.292777	0.388705	chr1:664554-664577_-
11.9703	-2.6315	0.611001	-4.30688	1.65576e-05	0.000250919	chr1:664998-665010_-
4.98804	-4.41713	1.28635	-3.43385	0.000595073	0.0034786	chr1:665167-665188_-
2.2957	3.04768	1.34481	2.26625	0.023436	0.0564508	chr1:665344-665369_-
1.83591	-0.843513	1.34395	-0.627637	0.530242	0.61906	chr1:666146-666169_-
2.08858	-4.19578	1.49781	-2.80127	0.00509015	0.0175049	chr1:666259-666283_-
1.88218	-2.94926	1.51372	-1.94835	0.0513726	0.102917	chr1:666309-666332_-
1.20241	-3.37775	1.94357	-1.73791	0.0822269	0.147004	chr1:666631-666654_-
6.37386	-4.79413	1.26514	-3.7894	0.000151013	0.001269	chr1:666982-666988_-
1.22489	-2.22478	1.87187	-1.18853	0.234624	0.32883	chr1:667074-667097_-
4.90936	-3.46019	1.14627	-3.01865	0.00253901	0.0102903	chr1:667163-667194_-
1.58754	1.66604	1.43962	1.15727	0.24716	0.341657	chr1:667417-667440_-
3.87252	-3.146	1.20799	-2.60433	0.00920542	0.0275794	chr1:667511-667535_-
3.07528	-3.68142	1.36252	-2.70192	0.00689401	0.0220866	chr1:668287-668310_-
3.25008	-0.68031	0.942677	-0.721679	0.470492	0.565673	chr1:668672-668705_-
2.49826	-1.13561	1.09638	-1.03579	0.300302	0.396356	chr1:669308-669333_-
12.1801	-4.82895	1.07066	-4.51025	6.47519e-06	0.000124585	chr1:669523-669551_-
8.56264	-3.70657	0.923479	-4.0137	5.97748e-05	0.000645826	chr1:670385-670397_-
0.969957	-3.08938	2.22907	-1.38595	0.165761	NA	chr1:670470-670493_-
2.31325	-3.23495	1.45812	-2.21857	0.0265161	0.0618963	chr1:670571-670611_-
4.62363	-2.73986	1.00896	-2.71552	0.00661726	0.0213904	chr1:670917-670941_-
2.06587	-2.13446	1.39071	-1.5348	0.124834	0.202358	chr1:671710-671715_-
2.90285	0.873487	0.95546	0.914206	0.360608	0.457349	chr1:672159-672184_-
1.2463	-2.1903	1.83442	-1.194	0.232478	0.326565	chr1:672373-672396_-
4.49984	-2.69882	1.00566	-2.68363	0.00728278	0.0230534	chr1:672863-672903_-
4.44664	-3.31508	1.16359	-2.849	0.00438565	0.015674	chr1:672927-672967_-
2.35135	-2.26344	1.32657	-1.70624	0.087964	0.154795	chr1:673066-673132_-
8.59954	-4.29877	1.08961	-3.94526	7.97151e-05	0.000795122	chr1:673792-673805_-
2.0383	-4.17026	1.49881	-2.78239	0.00539599	0.0182645	chr1:673872-673905_-
4.15501	-1.95073	0.932478	-2.09198	0.03644	0.0790022	chr1:673990-674012_-
6.3823	-1.01722	0.658232	-1.54537	0.122256	0.198987	chr1:674320-674356_-
1.5921	-1.56478	1.518	-1.03082	0.302627	0.398598	chr1:674409-674432_-
1.88065	-4.03765	1.51662	-2.66226	0.00776175	0.0241135	chr1:675126-675131_-
4.72894	1.94718	0.791782	2.45924	0.0139232	0.0378217	chr1:675567-675601_-
2.36213	-4.37053	1.44665	-3.02114	0.00251827	0.0102225	chr1:676904-676929_-
4.24339	-1.5947	0.877301	-1.81773	0.0691055	0.128618	chr1:677236-677286_-
2.53036	-4.46184	1.43085	-3.11831	0.00181892	0.00801693	chr1:677443-677468_-
1.59193	-0.478437	1.43018	-0.33453	0.73798	0.797133	chr1:677699-677724_-
2.40125	-4.38695	1.42918	-3.06956	0.00214377	0.00911907	chr1:678512-678534_-
10.9943	-2.71914	0.646656	-4.20493	2.61162e-05	0.000351621	chr1:678617-678642_-
2.02481	-1.07624	1.24981	-0.861129	0.389167	0.487159	chr1:678710-678735_-
8.87188	-2.15146	0.648869	-3.31571	0.000914101	0.00478999	chr1:678953-678959_-
1.58604	-0.749976	1.39961	-0.535848	0.592064	0.675049	chr1:679529-679552_-
1.99891	0.221374	1.18303	0.187124	0.851563	0.889085	chr1:679585-679610_-
1.70231	-2.6995	1.63614	-1.64992	0.0989591	0.168356	chr1:680008-680031_-
2.77403	-2.47857	1.25728	-1.97137	0.0486818	0.0984254	chr1:680138-680163_-
6.12816	-1.50649	0.705153	-2.1364	0.0326467	0.0729336	chr1:680302-680374_-
1.22535	-2.16673	1.84114	-1.17684	0.239258	0.333131	chr1:680831-680854_-
2.5112	-0.192096	1.03283	-0.185989	0.852453	0.889806	chr1:680954-680978_-
2.84317	-0.94675	1.01071	-0.936719	0.348903	0.445681	chr1:681162-681186_-
2.48006	-0.0618175	1.04006	-0.0594366	0.952604	0.966064	chr1:681722-681747_-
2.19509	-2.12065	1.33152	-1.59265	0.111238	0.184242	chr1:681996-682021_-
1.41173	-3.61722	1.71965	-2.10347	0.0354249	0.0774095	chr1:683090-683115_-
1.44866	-3.67216	1.71146	-2.14563	0.0319023	0.0714807	chr1:683405-683430_-
3.01511	-2.59543	1.2484	-2.079	0.0376172	0.0808219	chr1:684722-684756_-
2.6273	-3.42603	1.40364	-2.44082	0.0146541	0.0393617	chr1:685177-685200_-
2.10114	-4.20361	1.47882	-2.84253	0.00447565	0.0159028	chr1:685354-685379_-
9.90166	-5.44874	1.24262	-4.38488	1.16048e-05	0.000193445	chr1:685913-685918_-
2.07413	-3.08735	1.47025	-2.09988	0.0357394	0.0778906	chr1:687088-687121_-
3.47516	-3.86647	1.34059	-2.88415	0.00392471	0.0143615	chr1:687204-687262_-
2.57031	-3.39905	1.40862	-2.41304	0.0158201	0.041677	chr1:687414-687475_-
2.62698	-2.51204	1.29057	-1.94646	0.051599	0.103295	chr1:688746-688769_-
7.24151	-2.56697	0.774674	-3.31362	0.000920976	0.00481918	chr1:689143-689201_-
1.06438	-0.487645	2.00858	-0.242781	0.808175	NA	chr1:689396-689419_-
2.28783	0.704956	1.16031	0.607556	0.543482	0.630972	chr1:690332-690355_-
1.37693	-1.28079	1.61427	-0.793422	0.427532	0.523711	chr1:690406-690429_-
1.32174	-3.51493	1.82157	-1.92962	0.0536545	0.106476	chr1:691302-691327_-
2.17237	-4.23852	1.46126	-2.90059	0.00372458	0.013785	chr1:693393-693418_-
5.24452	-4.47918	1.2905	-3.47089	0.000518728	0.00314029	chr1:698076-698101_-
2.55283	-3.41588	1.41223	-2.41879	0.0155721	0.0411985	chr1:698231-698256_-
6.77083	-1.22499	0.642657	-1.90614	0.0566323	0.110849	chr1:700332-700366_-
11.0461	-1.77529	0.555397	-3.19644	0.00139136	0.00657034	chr1:700424-700425_-
14.5001	-1.87671	0.48569	-3.86402	0.000111536	0.00102207	chr1:700477-700508_-
1.34632	-1.04542	1.6326	-0.640337	0.521954	0.611674	chr1:700609-700632_-
6.86032	1.2668	0.611509	2.0716	0.0383026	0.0819505	chr1:703949-703999_-
1.97378	-0.429426	1.2033	-0.356874	0.721186	0.783071	chr1:704984-705009_-
3.61138	-0.667756	0.849708	-0.785866	0.431946	0.527656	chr1:708367-708409_-
5.56495	-0.792869	0.695724	-1.13963	0.25444	0.348994	chr1:709588-709639_-
2.88146	-0.0968432	0.937525	-0.103297	0.917728	0.940099	chr1:711426-711449_-
2.14164	-4.22356	1.46321	-2.88651	0.00389542	0.0142732	chr1:713001-713035_-
1.21978	-3.42025	1.88099	-1.81832	0.0690146	0.12851	chr1:713062-713087_-
4.82941	-2.85065	1.01084	-2.82009	0.00480101	0.0167916	chr1:713176-713190_-
2.97766	0.362213	0.957419	0.378322	0.705191	0.769771	chr1:713824-713847_-
2.81837	-1.71355	1.16928	-1.46548	0.142791	0.223967	chr1:714778-714785_+
2.14189	-3.09219	1.46417	-2.1119	0.0346946	0.0764525	chr1:714945-714952_+
4.41359	-1.68666	0.85464	-1.97354	0.0484345	0.0980149	chr1:715012-715022_+
1.94574	-1.82162	1.3698	-1.32984	0.183569	0.271838	chr1:715250-715257_+
4.34089	-1.03455	0.818787	-1.26351	0.206406	0.298012	chr1:715455-715488_+
4.79698	-1.83597	0.860447	-2.13374	0.0328642	0.0733277	chr1:715637-715708_+
6.19991	-1.71567	0.739678	-2.31949	0.0203687	0.0507253	chr1:715727-715761_+
4.66455	-1.20301	0.805672	-1.49317	0.135393	0.215319	chr1:716144-716192_+
4.08749	2.85631	0.974569	2.93085	0.00338036	0.0127916	chr1:716910-716917_+
3.84213	3.86022	1.20913	3.19255	0.00141022	0.00663497	chr1:718409-718416_+
15.2576	2.8447	0.499096	5.6997	1.20021e-08	9.43806e-07	chr1:719107-719185_+
6.45486	-1.80723	0.712732	-2.53564	0.0112242	0.0320808	chr1:719923-719939_+
1.54146	0.746502	1.42738	0.522986	0.600984	0.682308	chr1:721260-721267_+
0.972767	3.82123	2.27033	1.68312	0.0923519	NA	chr1:721746-721753_+
1.02024	-3.15152	2.15747	-1.46075	0.144084	NA	chr1:734335-734342_+
3.1597	-1.45623	0.999396	-1.45711	0.145087	0.22656	chr1:762179-762204_-
1.13642	-1.05154	1.91799	-0.548253	0.583518	0.667583	chr1:764394-764401_+
0.714536	-1.14048	2.7278	-0.418096	0.675877	NA	chr1:780284-780291_+
0.900916	-2.97106	2.34089	-1.2692	0.20437	NA	chr1:791234-791241_+
2.14386	-0.534928	1.19265	-0.448519	0.653779	0.726247	chr1:803791-803816_-
0.499649	-2.12546	3.97372	-0.534879	0.592734	NA	chr1:847513-847520_+
9.96672	-1.17446	0.530221	-2.21504	0.026757	0.0623503	chr1:850149-850221_+
1.44052	-2.45266	1.70818	-1.43583	0.151049	0.233967	chr1:853004-853029_-
0.522121	-0.660052	3.79805	-0.173787	0.862033	NA	chr1:853149-853174_-
0.963895	-1.81448	2.17631	-0.833739	0.404428	NA	chr1:854681-854706_-
0.891135	-2.95766	2.35903	-1.25376	0.209928	NA	chr1:861259-861266_+
1.71489	-1.81183	1.48532	-1.21982	0.222532	0.316219	chr1:861656-861663_+
1.09067	-3.25865	2.19231	-1.48641	0.137172	NA	chr1:864172-864179_+
1.10805	1.76007	1.90791	0.922514	0.35626	NA	chr1:864465-864472_+
0.230515	1.68029	4.08047	0.411789	0.680494	NA	chr1:866389-866396_+
5.65076	0.41618	0.659203	0.631339	0.527819	0.616774	chr1:878907-878914_+
0.541542	-2.23498	3.96887	-0.563127	0.573348	NA	chr1:879300-879307_+
1.12154	-2.10488	1.97035	-1.06828	0.285394	0.381039	chr1:879478-879485_+
2.58581	0.196207	1.00444	0.19534	0.845127	0.883932	chr1:879598-879632_+
1.94553	4.83274	1.54758	3.12277	0.00179158	0.00791754	chr1:879932-879957_-
2.30453	-2.31518	1.33847	-1.72973	0.0836786	0.149171	chr1:880506-880539_-
0.860408	-2.91338	2.44086	-1.19359	0.232639	NA	chr1:889709-889733_-
1.60382	-2.66822	1.62246	-1.64456	0.100061	0.169728	chr1:890739-890763_-
4.9655	-3.46902	1.14853	-3.02041	0.00252433	0.0102438	chr1:891157-891218_-
1.23145	-0.810595	1.80288	-0.44961	0.652992	0.725537	chr1:891291-891315_-
4.17235	-5.18347	1.30995	-3.95701	7.58923e-05	0.0007676	chr1:893584-893594_-
10.1485	-3.15594	0.748254	-4.21774	2.46767e-05	0.000337039	chr1:893745-893751_-
13.0361	-3.01671	0.652293	-4.62478	3.74995e-06	8.30467e-05	chr1:893755-893777_-
14.2914	-3.45207	0.687196	-5.02341	5.07618e-07	1.82648e-05	chr1:893905-893909_-
3.30033	-1.56927	1.00596	-1.55997	0.118767	0.194318	chr1:893996-894029_-
3.82565	1.05088	0.836631	1.25609	0.209083	0.301176	chr1:894143-894167_-
4.65727	-2.28775	0.916149	-2.49713	0.0125202	0.0348564	chr1:894412-894445_-
1.07344	-2.0068	2.00408	-1.00136	0.316655	NA	chr1:897112-897119_+
5.78807	-1.89297	0.765277	-2.47358	0.0133768	0.036632	chr1:897207-897238_+
2.30287	-4.32227	1.44382	-2.99363	0.00275678	0.0109486	chr1:897657-897708_+
0.672038	-2.54588	3.28722	-0.774477	0.438649	NA	chr1:898553-898560_+
1.20394	-2.20103	1.86252	-1.18175	0.237305	0.331366	chr1:899202-899209_+
4.73917	3.5156	1.01878	3.45078	0.000558962	0.003321	chr1:934390-934415_-
12.0152	-3.12756	0.680752	-4.59427	4.34269e-06	9.25429e-05	chr1:935019-935022_-
1.69228	-3.87282	1.58819	-2.43852	0.0147475	0.03956	chr1:948836-948843_+
0.985308	-1.767	2.12354	-0.8321	0.405352	NA	chr1:949135-949142_+
0.762027	-2.73359	2.97269	-0.919568	0.357799	NA	chr1:983643-983650_+
1.2924	-3.48907	1.8254	-1.9114	0.0559527	0.109977	chr1:985398-985405_+
3.91315	-0.308362	0.826503	-0.373093	0.70908	0.772918	chr1:988779-988854_+
2.84986	3.36226	1.27854	2.62976	0.00854448	0.02592	chr1:990385-990392_+
0.996148	-0.790518	2.09946	-0.376534	0.70652	NA	chr1:996070-996103_+
1.14806	-0.893555	1.82117	-0.49065	0.623674	0.701098	chr1:1018814-1018839_-
1.31952	-1.02296	1.69853	-0.602264	0.546999	0.634109	chr1:1027006-1027031_-
1.18285	-3.35854	1.96145	-1.71227	0.0868469	0.153262	chr1:1027181-1027206_-
1.52142	-2.60348	1.66923	-1.55969	0.118833	0.194364	chr1:1028317-1028342_-
2.06573	-3.0841	1.50297	-2.052	0.0401694	0.0850451	chr1:1029835-1029859_-
1.34599	-0.359933	1.57437	-0.228619	0.819165	0.863842	chr1:1031650-1031674_-
0.7802	-2.76323	2.88222	-0.958717	0.337701	NA	chr1:1032405-1032430_-
3.98016	-2.42302	1.03469	-2.34177	0.0191924	0.0484232	chr1:1033501-1033556_-
1.95327	-4.07899	1.51416	-2.6939	0.0070621	0.0225135	chr1:1033587-1033612_-
2.14506	-1.27904	1.2153	-1.05245	0.292595	0.388552	chr1:1034047-1034072_-
3.16466	-4.78553	1.37231	-3.48722	0.000488067	0.00299773	chr1:1038231-1038283_-
1.46692	-1.41935	1.63932	-0.865817	0.38659	0.48443	chr1:1039187-1039212_-
1.21372	-2.21149	1.86313	-1.18698	0.235236	0.329229	chr1:1041158-1041183_-
3.24653	-2.73218	1.21659	-2.24576	0.0247191	0.0586443	chr1:1044959-1045017_-
1.11162	-3.28276	2.17277	-1.51087	0.130822	NA	chr1:1045242-1045267_-
2.30221	-0.296739	1.07062	-0.277165	0.781654	0.83342	chr1:1045991-1046016_-
3.38579	-0.858566	0.902048	-0.951796	0.341201	0.437986	chr1:1050690-1050724_-
8.79931	-4.37187	1.09806	-3.98145	6.84948e-05	0.000716141	chr1:1110358-1110366_+
3.77797	-2.3835	1.04455	-2.28184	0.0224989	0.054771	chr1:1110473-1110511_-
0.931643	-3.01337	2.31664	-1.30075	0.193344	NA	chr1:1156442-1156467_-
1.43085	0.493782	1.51668	0.325568	0.744751	0.802965	chr1:1157170-1157195_-
1.40919	-0.519545	1.52176	-0.34141	0.732795	0.792925	chr1:1189843-1189868_-
0.480089	-2.07268	3.97619	-0.521273	0.602177	NA	chr1:1190554-1190579_-
3.89503	2.85041	0.996558	2.86025	0.00423301	0.015267	chr1:1191506-1191531_-
1.2767	-1.26965	1.78323	-0.711994	0.476469	0.571718	chr1:1192213-1192238_-
4.63798	2.40928	0.838774	2.87238	0.00407393	0.0147937	chr1:1192695-1192720_-
0.864592	-1.51549	2.50541	-0.604884	0.545256	NA	chr1:1193713-1193738_-
0.850628	-2.89815	2.66216	-1.08864	0.276311	NA	chr1:1196464-1196489_-
4.26179	-1.5984	0.864592	-1.84873	0.0644966	0.121877	chr1:1200969-1201002_-
1.84303	-0.991861	1.37092	-0.723498	0.469374	0.564572	chr1:1203511-1203536_-
1.17321	-2.16666	1.88666	-1.14841	0.250799	0.344915	chr1:1203815-1203840_-
0.964361	-1.73395	2.16982	-0.799119	0.424221	NA	chr1:1204519-1204544_-
1.06413	-1.92517	2.03472	-0.946162	0.344066	NA	chr1:1204598-1204623_-
2.85389	-0.848061	0.984865	-0.861094	0.389186	0.487179	chr1:1204894-1204919_-
2.64506	-1.72874	1.14646	-1.50789	0.131582	0.211032	chr1:1206118-1206143_-
1.32793	3.15668	1.80676	1.74715	0.080611	0.1449	chr1:1207044-1207069_-
1.91163	-2.9013	1.52925	-1.89721	0.0578001	0.112477	chr1:1207128-1207151_-
1.3674	-0.257541	1.51175	-0.170359	0.864727	0.899025	chr1:1207430-1207455_-
3.05083	-0.663487	0.947124	-0.700528	0.483598	0.578504	chr1:1215029-1215072_+
1.16205	-2.15295	1.92167	-1.12035	0.262564	0.357361	chr1:1230443-1230468_-
1.40951	-1.17504	1.72529	-0.681068	0.495829	0.589364	chr1:1234863-1234888_-
2.31417	-3.26158	1.43432	-2.27396	0.0229685	0.0556358	chr1:1236581-1236606_-
1.90338	-1.87619	1.38746	-1.35225	0.176297	0.263771	chr1:1240133-1240158_-
1.16343	-2.15571	1.92059	-1.12242	0.261684	0.356581	chr1:1241417-1241442_-
0.589637	-2.37077	3.67583	-0.644962	0.518952	NA	chr1:1245214-1245221_+
3.45034	1.88419	0.936389	2.01219	0.0442004	0.0914388	chr1:1251663-1251688_-
9.0075	-1.24829	0.564943	-2.20959	0.0271336	0.0630449	chr1:1251744-1251769_-
18.925	-1.97125	0.455183	-4.33068	1.48648e-05	0.000231658	chr1:1252039-1252064_-
13.1159	-3.26563	0.677935	-4.81702	1.45716e-06	4.07825e-05	chr1:1252263-1252269_-
3.87835	-0.547587	0.815297	-0.671641	0.501812	0.594461	chr1:1252366-1252397_-
10.9817	-2.71722	0.651845	-4.16851	3.06601e-05	0.000395023	chr1:1252539-1252550_-
16.4096	-1.11141	0.431282	-2.57699	0.00996661	0.0293705	chr1:1252643-1252668_-
8.46901	-0.176893	0.570638	-0.309992	0.756567	0.812559	chr1:1252746-1252769_-
2.13364	-2.08718	1.34106	-1.55637	0.11962	0.195419	chr1:1253027-1253049_-
46.6297	-2.6642	0.344137	-7.7417	9.80996e-15	7.06069e-12	chr1:1253288-1253319_-
10.1101	2.09541	0.548772	3.81835	0.000134345	0.00116625	chr1:1253722-1253797_-
3.07579	-0.188384	0.912964	-0.206344	0.836523	0.877508	chr1:1254001-1254023_-
16.0258	3.90755	0.601982	6.49114	8.5188e-11	1.58229e-08	chr1:1254091-1254145_-
1.87087	-4.03233	1.51798	-2.65638	0.00789834	0.0244324	chr1:1256149-1256173_-
1.88313	4.74959	1.55268	3.05895	0.00222111	0.00933813	chr1:1282994-1283019_-
1.25051	-3.44972	1.84262	-1.87218	0.0611816	0.117149	chr1:1284387-1284412_-
0.850628	-2.89815	2.66216	-1.08864	0.276311	NA	chr1:1309709-1309734_-
5.96391	3.87832	0.992486	3.90768	9.31866e-05	0.000888944	chr1:1322229-1322252_-
3.85707	-1.08244	0.905405	-1.19553	0.23188	0.325967	chr1:1322353-1322388_-
3.71732	-0.999273	0.881822	-1.13319	0.257134	0.351968	chr1:1322556-1322579_-
2.11307	3.90007	1.49968	2.60061	0.00930592	0.0278024	chr1:1325074-1325097_-
3.94152	-0.807836	0.837551	-0.964521	0.334785	0.431483	chr1:1325632-1325655_-
11.8653	-0.838115	0.488431	-1.71593	0.0861743	0.152422	chr1:1325743-1325759_-
17.0382	1.47718	0.413768	3.57006	0.000356902	0.00237558	chr1:1325874-1325897_-
9.04154	2.18389	0.576599	3.78754	0.000152147	0.00127598	chr1:1326240-1326273_-
6.05372	2.59725	0.748943	3.46789	0.000524559	0.00316833	chr1:1326699-1326722_-
32.3822	-3.60408	0.481052	-7.49208	6.77925e-14	3.72153e-11	chr1:1326769-1326799_-
5.32572	0.179687	0.667114	0.269349	0.787661	0.83839	chr1:1326864-1326885_-
33.5241	3.3975	0.395721	8.58561	9.03595e-18	1.59272e-14	chr1:1327013-1327047_-
4.11687	-0.953173	0.807711	-1.18009	0.237964	0.331934	chr1:1327503-1327540_-
5.62976	0.807571	0.659678	1.22419	0.220881	0.314542	chr1:1327794-1327817_-
21.1073	3.05247	0.444855	6.86171	6.80412e-12	1.87754e-09	chr1:1327863-1327898_-
22.3042	4.05984	0.533001	7.61694	2.59755e-14	1.63759e-11	chr1:1327999-1328022_-
34.0163	-1.30333	0.315606	-4.12962	3.63371e-05	0.000447408	chr1:1328121-1328209_-
5.8716	-1.61716	0.744532	-2.17204	0.0298524	0.0676933	chr1:1328409-1328431_-
4.0721	0.692339	0.795038	0.870825	0.38385	0.481399	chr1:1329148-1329171_-
2.99401	2.80673	1.13354	2.47607	0.0132836	0.0364037	chr1:1329241-1329266_-
1.18147	-3.35597	1.94368	-1.72661	0.0842376	0.149759	chr1:1329315-1329336_-
3.49683	-0.857659	0.876647	-0.97834	0.327906	0.424537	chr1:1329932-1329944_-
5.62333	-1.56691	0.757627	-2.06818	0.0386234	0.0824152	chr1:1330215-1330249_-
6.10213	3.16635	0.831041	3.8101	0.000138908	0.00119417	chr1:1330571-1330604_-
5.19449	4.32269	1.16401	3.71361	0.000204325	0.00158251	chr1:1330830-1330853_-
3.34655	-2.06745	1.06917	-1.9337	0.0531502	0.105714	chr1:1331707-1331739_-
8.18181	-2.22747	0.690758	-3.22468	0.00126115	0.00608136	chr1:1332722-1332738_-
2.38346	-2.28017	1.30152	-1.75192	0.0797868	0.143713	chr1:1333140-1333161_-
3.62197	-1.75758	0.981464	-1.79078	0.0733292	0.134874	chr1:1333351-1333372_-
5.22419	-1.71133	0.786789	-2.17508	0.0296238	0.0672655	chr1:1333784-1333817_-
2.02283	2.84896	1.39778	2.03821	0.0415292	0.0870978	chr1:1334052-1334077_-
2.96518	-0.377671	0.943992	-0.400078	0.689099	0.756505	chr1:1337354-1337387_-
1.52035	2.26907	1.57354	1.44201	0.149299	0.231781	chr1:1337687-1337712_-
5.21111	-2.88166	0.976136	-2.95211	0.0031561	0.0121738	chr1:1338665-1338700_-
1.14096	-3.31417	1.96015	-1.69077	0.0908798	0.158488	chr1:1340032-1340066_-
2.05457	-3.07738	1.48206	-2.07643	0.0378543	0.0812015	chr1:1341545-1341578_-
5.57378	-1.8346	0.77347	-2.37192	0.0176961	0.0454383	chr1:1341742-1341750_-
2.62709	-2.42216	1.28973	-1.87804	0.0603763	0.116328	chr1:1342537-1342561_-
0.979737	-3.1017	2.19337	-1.41413	0.157325	NA	chr1:1387797-1387804_+
9.61323	-1.65063	0.589741	-2.7989	0.00512763	0.017591	chr1:1404401-1404435_+
5.59667	-2.17206	0.823953	-2.63615	0.00838533	0.0255527	chr1:1404940-1404973_+
1.3405	-3.55742	1.8033	-1.97273	0.0485266	0.0981528	chr1:1405014-1405021_+
1.27284	-3.47196	1.89229	-1.8348	0.0665359	0.12497	chr1:1407935-1407942_+
0.630144	-2.45941	3.17633	-0.774294	0.438757	NA	chr1:1408226-1408233_+
1.58054	-3.7969	1.66141	-2.28536	0.0222919	0.0544288	chr1:1410763-1410796_+
0.739693	-2.6938	2.77055	-0.972298	0.330902	NA	chr1:1411085-1411092_+
3.75316	-3.98001	1.32425	-3.00548	0.00265159	0.0106172	chr1:1411452-1411460_+
1.86123	-2.93592	1.52636	-1.92348	0.0544198	0.107672	chr1:1412814-1412852_+
5.90034	-1.16225	0.743315	-1.5636	0.117912	0.193168	chr1:1413283-1413336_+
7.6955	-2.69577	0.784032	-3.43835	0.000585279	0.00343724	chr1:1413430-1413460_+
3.52246	-1.23982	0.913848	-1.35671	0.174875	0.262094	chr1:1413598-1413607_+
0.810927	-2.81403	2.82406	-0.996446	0.319033	NA	chr1:1414081-1414088_+
1.74726	-0.945521	1.33692	-0.707239	0.479418	0.574563	chr1:1414215-1414222_+
3.18522	-2.05828	1.09747	-1.87548	0.0607267	0.116728	chr1:1418317-1418378_+
2.8768	-2.65814	1.26338	-2.104	0.0353784	0.0773974	chr1:1418574-1418582_+
1.11187	-1.98211	1.9868	-0.997636	0.318456	NA	chr1:1418748-1418755_+
2.53958	-3.38566	1.41654	-2.39009	0.0168443	0.0436464	chr1:1418889-1418942_+
1.19416	-2.19067	1.8781	-1.16643	0.243442	0.337666	chr1:1419932-1419939_+
1.30775	-2.25934	1.89632	-1.19143	0.233484	0.327772	chr1:1422565-1422572_+
1.61651	-1.70113	1.52044	-1.11884	0.263207	0.357915	chr1:1422633-1422640_+
1.38253	-2.45187	1.74121	-1.40814	0.159089	0.243796	chr1:1425218-1425225_+
0.76064	-2.7301	2.68876	-1.01537	0.309928	NA	chr1:1425450-1425457_+
0.720383	-1.14056	2.71122	-0.42068	0.673989	NA	chr1:1425953-1425960_+
0.219097	-0.96462	4.05484	-0.237894	0.811964	NA	chr1:1426422-1426429_+
1.26181	-2.29913	1.81498	-1.26675	0.205243	0.296678	chr1:1426786-1426793_+
1.12343	0.344444	1.80808	0.190503	0.848915	0.886935	chr1:1427604-1427611_+
2.71569	-2.48531	1.26677	-1.96192	0.0497713	0.100258	chr1:1427805-1427846_+
1.52267	-3.73037	1.67937	-2.2213	0.0263309	0.061544	chr1:1431190-1431223_+
0.762166	-1.41459	2.75939	-0.512648	0.608197	NA	chr1:1432541-1432548_+
3.78886	-1.85658	0.96365	-1.92662	0.0540276	0.107025	chr1:1432997-1433043_+
1.31034	-0.493674	1.8116	-0.272507	0.785232	0.836465	chr1:1433185-1433213_+
1.49751	-2.50907	1.70878	-1.46834	0.142011	0.222984	chr1:1448319-1448326_+
0.969957	-3.08938	2.22907	-1.38595	0.165761	NA	chr1:1449113-1449120_+
5.31238	-1.7074	0.780114	-2.18865	0.0286224	0.0655123	chr1:1449813-1449836_+
1.0121	-1.79919	2.10955	-0.852875	0.393728	NA	chr1:1450126-1450133_+
3.04586	-2.03112	1.09117	-1.86142	0.062685	0.119364	chr1:1451700-1451738_+
0.963895	-1.81448	2.17631	-0.833739	0.404428	NA	chr1:1452882-1452889_+
0.672038	-2.54588	3.28722	-0.774477	0.438649	NA	chr1:1455901-1455908_+
0.891135	-2.95766	2.35903	-1.25376	0.209928	NA	chr1:1455980-1455987_+
0.74108	-2.69661	3.01077	-0.895656	0.370437	NA	chr1:1456117-1456124_+
0.960151	-0.223247	2.16832	-0.102958	0.917996	NA	chr1:1456220-1456227_+
0.960427	-1.71896	2.17445	-0.790527	0.42922	NA	chr1:1462440-1462447_+
0.720383	-1.14056	2.71122	-0.42068	0.673989	NA	chr1:1464613-1464620_+
0.739693	-2.6938	2.77055	-0.972298	0.330902	NA	chr1:1468805-1468812_+
1.2519	-3.4518	1.88995	-1.8264	0.0677902	0.126727	chr1:1469631-1469664_+
9.12308	5.14378	1.10579	4.65168	3.29242e-06	7.51626e-05	chr1:1477248-1477273_-
10.714	2.93995	0.597118	4.92356	8.49835e-07	2.70849e-05	chr1:1477354-1477390_-
1.31349	-2.3514	1.76248	-1.33414	0.182157	0.270232	chr1:1478221-1478244_-
4.28322	0.406316	0.75329	0.539388	0.589619	0.673103	chr1:1480381-1480415_-
1.37147	-2.35114	1.72546	-1.36262	0.173004	0.260185	chr1:1483477-1483500_-
1.60546	-1.53227	1.52545	-1.00447	0.31515	0.411443	chr1:1483818-1483841_-
1.04119	-3.17668	2.10979	-1.50569	0.132148	NA	chr1:1486095-1486120_-
1.08929	-3.25776	2.03768	-1.59875	0.109875	NA	chr1:1491803-1491826_-
5.13094	-0.337296	0.69002	-0.48882	0.624969	0.702307	chr1:1495141-1495182_-
4.24237	-1.26968	0.825349	-1.53835	0.123962	0.201298	chr1:1498851-1498876_-
7.96323	-3.0865	0.839884	-3.67491	0.000237932	0.0017713	chr1:1499001-1499028_-
2.24166	-3.17169	1.44514	-2.19473	0.0281831	0.0648179	chr1:1499215-1499238_-
1.7221	-0.154784	1.28651	-0.120313	0.904235	0.929585	chr1:1499796-1499821_-
1.7462	-1.58883	1.44081	-1.10274	0.270142	0.365296	chr1:1500492-1500517_-
0.459142	-2.01322	3.97909	-0.505951	0.612891	NA	chr1:1501186-1501209_-
1.56088	0.100237	1.34709	0.0744096	0.940684	0.957224	chr1:1505835-1505860_-
1.8107	-0.308878	1.23096	-0.250923	0.801873	0.849969	chr1:1506803-1506826_-
1.49055	-3.70545	1.66696	-2.22288	0.0262236	0.0613441	chr1:1508128-1508151_-
1.19462	-2.13149	1.8895	-1.12807	0.259289	0.354281	chr1:1508582-1508607_-
4.5563	-3.30556	1.15145	-2.87077	0.00409474	0.0148545	chr1:1508925-1508981_-
7.47918	-4.07251	1.10409	-3.68855	0.000225532	0.00169882	chr1:1554490-1554505_+
0.995088	-1.78151	2.13059	-0.836158	0.403066	NA	chr1:1554689-1554696_+
1.23095	-3.4314	1.89902	-1.80693	0.0707735	0.131086	chr1:1555919-1555952_+
0.599417	-2.39352	3.32817	-0.71917	0.472036	NA	chr1:1558456-1558463_+
0.891135	-2.95766	2.35903	-1.25376	0.209928	NA	chr1:1561060-1561067_+
1.28323	-2.26719	1.82748	-1.24061	0.214749	0.307461	chr1:1573953-1573978_-
0.56869	-2.32172	3.81723	-0.608221	0.543041	NA	chr1:1575630-1575655_-
1.92885	3.75608	1.54908	2.42471	0.0153205	0.0406984	chr1:1576477-1576502_-
28.4128	-4.23732	0.606422	-6.9874	2.80025e-12	8.84841e-10	chr1:1576658-1576700_-
0.989517	-3.11363	2.20009	-1.41523	0.157001	NA	chr1:1581029-1581054_-
2.67712	-3.46926	1.41807	-2.44646	0.0144266	0.038869	chr1:1584190-1584214_-
2.08664	-3.08583	1.52123	-2.02851	0.0425078	0.0887916	chr1:1585199-1585224_-
2.02827	-1.16576	1.23254	-0.945821	0.34424	0.44081	chr1:1586166-1586191_-
2.19113	-0.639096	1.16319	-0.549434	0.582708	0.666919	chr1:1586927-1586952_-
0.972767	3.82123	2.27033	1.68312	0.0923519	NA	chr1:1593248-1593273_-
0.783113	-1.45872	2.70192	-0.539883	0.589278	NA	chr1:1593343-1593368_-
2.45833	-0.949737	1.07972	-0.879618	0.379066	0.476322	chr1:1593491-1593516_-
0.875759	-1.53628	2.32807	-0.659894	0.509322	NA	chr1:1594620-1594643_-
23.0609	-3.06274	0.489894	-6.25184	4.05646e-10	5.95505e-08	chr1:1594977-1595000_-
4.56469	-1.90209	0.893762	-2.12818	0.0333221	0.074209	chr1:1595041-1595065_-
2.55436	-2.48222	1.3051	-1.90194	0.0571792	0.111642	chr1:1595436-1595461_-
12.1198	-2.43943	0.58894	-4.14207	3.44184e-05	0.000430183	chr1:1595561-1595589_-
3.56261	-1.22076	0.923748	-1.32153	0.186325	0.274741	chr1:1595609-1595642_-
1.52153	-2.5221	1.65507	-1.52386	0.127543	0.205816	chr1:1596357-1596380_-
1.04676	-1.86133	2.19593	-0.847628	0.396645	NA	chr1:1597931-1597956_-
1.01071	-1.79723	2.24301	-0.80126	0.422981	NA	chr1:1600412-1600437_-
2.86994	4.32042	1.40979	3.06458	0.00217974	0.00923236	chr1:1601589-1601614_-
16.1229	-3.85538	0.711629	-5.41768	6.0377e-08	3.45729e-06	chr1:1601938-1601981_-
1.94831	-4.09856	1.52496	-2.68764	0.00719581	0.0228241	chr1:1602017-1602042_-
1.94856	-2.95175	1.58553	-1.86168	0.0626483	0.119313	chr1:1604857-1604880_-
1.12979	-3.3018	2.00881	-1.64366	0.100246	0.169744	chr1:1605018-1605041_-
2.63123	5.24947	1.43043	3.66987	0.000242678	0.00179406	chr1:1605549-1605574_-
2.10486	-3.10379	1.47058	-2.11059	0.0348071	0.0765821	chr1:1605961-1605986_-
0.835252	-1.45943	2.56824	-0.568258	0.56986	NA	chr1:1607284-1607309_-
1.71522	-2.74455	1.55882	-1.76065	0.0782969	0.141584	chr1:1612295-1612318_-
2.8101	-4.62798	1.39257	-3.32333	0.000889491	0.00468426	chr1:1612999-1613039_-
2.18985	-1.35806	1.24215	-1.09331	0.274257	0.369503	chr1:1617319-1617344_-
0.879969	-2.94122	2.40154	-1.22472	0.22068	NA	chr1:1619230-1619253_-
1.06923	-0.714586	2.01707	-0.35427	0.723137	NA	chr1:1619517-1619540_-
1.74176	-3.9304	1.57696	-2.4924	0.0126885	0.0351426	chr1:1620346-1620370_-
1.45005	-3.67365	1.7291	-2.1246	0.03362	0.0747233	chr1:1623631-1623654_-
6.24227	4.00411	0.980615	4.08327	4.44068e-05	0.000520683	chr1:1634209-1634246_-
1.26181	-2.29913	1.81498	-1.26675	0.205243	0.296678	chr1:1637172-1637197_-
3.1144	-3.69413	1.37883	-2.67918	0.00738025	0.0232701	chr1:1637556-1637608_-
1.74761	-1.00664	1.36601	-0.736916	0.461174	0.556118	chr1:1637975-1638010_-
3.56352	-1.82633	0.989507	-1.8457	0.0649356	0.122564	chr1:1639012-1639045_-
1.66018	-0.197086	1.35788	-0.145143	0.884598	0.914419	chr1:1640563-1640588_-
0.489869	-2.0993	3.95447	-0.530867	0.595511	NA	chr1:1641483-1641508_-
1.11023	-3.28127	2.00083	-1.63996	0.101014	NA	chr1:1644245-1644270_-
2.18772	-3.12011	1.46951	-2.12323	0.0337348	0.0749308	chr1:1647420-1647444_-
2.84031	-1.23388	1.07865	-1.14391	0.252661	0.346979	chr1:1653141-1653164_-
1.07976	-1.93816	2.018	-0.960433	0.336837	NA	chr1:1654020-1654045_-
3.97055	1.4036	0.823199	1.70506	0.0881835	0.155092	chr1:1654197-1654222_-
0	NA	NA	NA	NA	NA	chr1:1656301-1656308_+
2.2917	-4.31676	1.44427	-2.98888	0.00280001	0.0110843	chr1:1656355-1656379_-
4.01857	-3.17705	1.22892	-2.58524	0.00973126	0.0288038	chr1:1656541-1656551_+
1.14096	-3.31417	1.96015	-1.69077	0.0908798	0.158488	chr1:1656591-1656615_-
0.720383	-1.14056	2.71122	-0.42068	0.673989	NA	chr1:1658559-1658582_-
2.09166	3.87538	1.52031	2.54907	0.0108012	0.0311345	chr1:1659133-1659158_-
2.54311	-0.916132	1.12118	-0.817113	0.413864	0.511268	chr1:1659376-1659401_-
0.985308	-1.767	2.12354	-0.8321	0.405352	NA	chr1:1660509-1660532_-
1.52264	-1.30152	1.66876	-0.779932	0.435431	0.531064	chr1:1660717-1660742_-
20.72	-2.66368	0.475794	-5.59839	2.16353e-08	1.51908e-06	chr1:1660868-1660902_+
28.5612	-3.02563	0.444628	-6.80485	1.01152e-11	2.65545e-09	chr1:1660880-1660887_-
5.63262	0.216585	0.666131	0.325138	0.745076	0.803289	chr1:1660940-1660974_+
6.48474	-1.88113	0.731257	-2.57246	0.0100978	0.0296493	chr1:1660951-1660975_-
8.83448	-2.15448	0.65396	-3.29452	0.000985912	0.00507527	chr1:1661004-1661037_+
4.07148	-1.12916	0.847437	-1.33244	0.182717	0.270838	chr1:1661346-1661371_-
2.08069	-1.93344	1.37219	-1.40902	0.158829	0.243498	chr1:1661404-1661426_-
2.28605	-0.67529	1.1439	-0.590338	0.554964	0.641629	chr1:1661467-1661475_+
0.981098	-0.266811	2.27588	-0.117234	0.906675	NA	chr1:1662110-1662133_-
2.05343	-2.00601	1.37	-1.46424	0.143128	0.224383	chr1:1662263-1662286_-
2.22185	-4.28474	1.4777	-2.8996	0.00373639	0.013818	chr1:1662457-1662496_-
1.87822	-1.01193	1.25805	-0.804368	0.421185	0.518145	chr1:1662595-1662598_+
1.32537	-1.01982	1.64373	-0.620434	0.534972	0.623025	chr1:1662640-1662665_-
13.7397	-2.68702	0.58217	-4.61552	3.92115e-06	8.5987e-05	chr1:1662709-1662732_-
8.88444	-4.36999	1.09304	-3.99801	6.38783e-05	0.00067806	chr1:1663071-1663081_+
7.90268	-1.3574	0.611119	-2.22118	0.026339	0.0615595	chr1:1663149-1663172_-
7.03439	-1.76222	0.677939	-2.59938	0.00933935	0.0278904	chr1:1663180-1663201_+
16.465	-3.62473	0.65725	-5.51499	3.48797e-08	2.23592e-06	chr1:1663237-1663271_-
2.82966	-4.63499	1.38554	-3.34527	0.000822026	0.00441467	chr1:1663337-1663362_-
11.0984	-3.63291	0.800741	-4.53694	5.70763e-06	0.000113709	chr1:1663422-1663429_+
17.7499	-2.49746	0.494324	-5.05228	4.36569e-07	1.62271e-05	chr1:1663458-1663506_-
7.93227	-6.11208	1.25103	-4.88563	1.03099e-06	3.13507e-05	chr1:1663543-1663557_+
6.10962	-1.73854	0.73573	-2.36301	0.0181271	0.0462859	chr1:1663561-1663584_-
10.4178	-3.50194	0.818321	-4.27942	1.87378e-05	0.000276095	chr1:1665714-1665724_-
0.599417	-2.39352	3.32817	-0.71917	0.472036	NA	chr1:1666815-1666838_-
1.60521	-2.67001	1.61518	-1.65308	0.0983149	0.167574	chr1:1667589-1667614_-
3.38944	4.59344	1.36417	3.36721	0.00075932	0.00415297	chr1:1668724-1668749_-
2.62755	-2.36195	1.2676	-1.86332	0.0624168	0.118968	chr1:1668817-1668842_-
0.981124	-3.10334	2.37834	-1.30483	0.19195	NA	chr1:1670142-1670167_-
1.76296	-2.77394	1.5557	-1.78308	0.0745737	0.136555	chr1:1673288-1673312_-
5.10085	-3.5432	1.15524	-3.06707	0.00216165	0.0091728	chr1:1675542-1675565_-
1.79289	3.60584	1.57227	2.2934	0.0218252	0.0536243	chr1:1685090-1685115_-
2.52552	-1.08478	1.08527	-0.999549	0.317529	0.413821	chr1:1688307-1688332_-
1.59032	-3.80418	1.62903	-2.33525	0.0195303	0.0490988	chr1:1688612-1688637_-
0.468922	-2.04075	3.97773	-0.513043	0.607921	NA	chr1:1690503-1690528_-
2.53183	-1.01838	1.11568	-0.912786	0.361355	0.458123	chr1:1692385-1692410_-
0.620364	-2.43916	3.21698	-0.758213	0.448323	NA	chr1:1692562-1692587_-
18.6755	-0.591457	0.386067	-1.532	0.125521	0.203271	chr1:1696855-1696891_-
1.03294	-1.95358	2.06606	-0.945558	0.344374	NA	chr1:1697100-1697125_-
1.58472	-2.61377	1.6098	-1.62367	0.104447	0.174981	chr1:1697481-1697506_-
1.25051	-3.44972	1.84262	-1.87218	0.0611816	0.117149	chr1:1698628-1698653_-
0.630144	-2.45941	3.17633	-0.774294	0.438757	NA	chr1:1699709-1699734_-
1.093	-2.03341	2.13273	-0.953433	0.340371	NA	chr1:1701606-1701631_-
4.09278	-0.400829	0.791693	-0.506293	0.612651	0.692225	chr1:1703281-1703325_-
1.77869	-3.97567	1.59099	-2.49886	0.0124592	0.0347234	chr1:1706095-1706120_-
5.04349	5.15717	1.30641	3.9476	7.89382e-05	0.000790698	chr1:1718341-1718366_-
1.73642	-1.58242	1.43267	-1.10453	0.269364	0.364688	chr1:1719337-1719362_-
0.944335	-1.78576	2.23037	-0.800655	0.423331	NA	chr1:1720911-1720934_-
1.44122	0.908988	1.50979	0.602062	0.547133	0.634225	chr1:1724128-1724153_-
1.21839	-3.41673	2.02964	-1.68342	0.0922937	0.160327	chr1:1726392-1726415_-
0.973675	-1.82916	2.19047	-0.835058	0.403685	NA	chr1:1726976-1727001_-
2.6818	-4.54203	1.40367	-3.23583	0.00121289	0.0059098	chr1:1728922-1728963_-
1.62676	-1.60354	1.48331	-1.08106	0.279672	0.375477	chr1:1729183-1729206_-
1.47787	-0.586515	1.51646	-0.386766	0.698929	0.76454	chr1:1731022-1731047_-
4.71288	-2.30282	0.908498	-2.53476	0.0112524	0.0321437	chr1:1732520-1732539_-
6.31192	-1.12804	0.700123	-1.6112	0.107136	0.178745	chr1:1732672-1732747_-
3.72828	-1.85471	0.96123	-1.92952	0.0536663	0.106495	chr1:1733967-1733991_-
2.22904	3.95037	1.48959	2.65199	0.00800196	0.0246872	chr1:1734451-1734476_-
2.75188	-1.8382	1.12731	-1.6306	0.102974	0.173387	chr1:1734958-1734981_-
3.75043	-3.98282	1.35797	-2.93292	0.00335794	0.012738	chr1:1736710-1736732_-
5.96336	-3.10289	0.957648	-3.24012	0.0011948	0.00584727	chr1:1737031-1737057_-
2.08391	-3.09236	1.47198	-2.10081	0.0356572	0.077786	chr1:1737910-1737935_-
1.21372	-2.21149	1.86313	-1.18698	0.235236	0.329229	chr1:1741433-1741456_-
2.10139	-3.07089	1.46677	-2.09364	0.0362921	0.0787705	chr1:1741566-1741589_-
1.02163	-3.15397	2.13506	-1.47723	0.139614	NA	chr1:1741975-1741998_-
1.67425	-2.7528	1.58546	-1.73628	0.0825142	0.147397	chr1:1745065-1745088_-
1.1426	-2.02143	1.9588	-1.03197	0.302085	0.398045	chr1:1746066-1746089_-
1.6001	-3.81094	1.61405	-2.3611	0.018221	0.0464371	chr1:1746460-1746483_-
1.45654	-2.5209	1.84929	-1.36317	0.172828	0.260134	chr1:1747614-1747639_-
1.8411	3.63724	1.56359	2.32622	0.0200071	0.0500084	chr1:1749315-1749340_-
3.88061	-3.03409	1.1933	-2.5426	0.011003	0.0315664	chr1:1751538-1751600_-
5.55901	-2.10842	0.814556	-2.58843	0.00964159	0.0285943	chr1:1753325-1753342_-
1.4503	-2.4615	1.68236	-1.46312	0.143433	0.224717	chr1:1753817-1753840_-
3.19819	-3.72315	1.36192	-2.73376	0.00626162	0.0204973	chr1:1754444-1754468_-
2.88949	-2.00429	1.13227	-1.77016	0.0767007	0.13942	chr1:1756225-1756250_-
6.365	1.48859	0.668307	2.2274	0.0259204	0.0608689	chr1:1756784-1756817_-
1.96167	-4.08381	1.53863	-2.65418	0.00795011	0.0245571	chr1:1761234-1761259_-
0.881494	-1.68247	2.32706	-0.723001	0.46968	NA	chr1:1762252-1762275_-
2.35787	-1.13739	1.18146	-0.962696	0.3357	0.432463	chr1:1763716-1763741_-
0.989517	-3.11363	2.20009	-1.41523	0.157001	NA	chr1:1768747-1768772_-
0.520596	-2.18069	3.75771	-0.580326	0.561695	NA	chr1:1769416-1769439_-
4.03863	-0.800635	0.811928	-0.986091	0.324089	0.420664	chr1:1772383-1772407_-
2.69322	-3.45043	1.40563	-2.45472	0.0140994	0.0381954	chr1:1772682-1772706_-
2.67517	2.12821	1.09225	1.94847	0.051359	0.102917	chr1:1774597-1774620_-
1.09464	-0.736029	2.01514	-0.365249	0.714926	NA	chr1:1777677-1777700_-
10.8995	-3.64844	0.814273	-4.48061	7.443e-06	0.000138655	chr1:1781629-1781635_-
1.17321	-2.16666	1.88666	-1.14841	0.250799	0.344915	chr1:1782384-1782417_-
1.46507	-1.53718	1.60405	-0.958309	0.337907	0.434815	chr1:1784343-1784366_-
0.849242	-2.89618	2.47269	-1.17127	0.241492	NA	chr1:1784494-1784517_-
3.20482	2.00784	0.97799	2.05303	0.0400698	0.0848647	chr1:1784815-1784840_-
3.4397	-0.147098	0.883978	-0.166404	0.867839	0.901428	chr1:1785267-1785291_-
1.59582	-0.760181	1.4173	-0.536359	0.591711	0.674775	chr1:1786233-1786256_-
1.08369	-1.95008	2.12436	-0.91796	0.35864	NA	chr1:1787521-1787544_-
2.5433	-2.38326	1.29185	-1.84485	0.0650599	0.122715	chr1:1787806-1787831_-
0.922001	-1.74873	2.37862	-0.735188	0.462225	NA	chr1:1790011-1790036_-
3.04966	-2.69325	1.23316	-2.18403	0.0289602	0.0661166	chr1:1790584-1790621_-
1.75332	-1.73397	1.43479	-1.20852	0.226849	0.320569	chr1:1791182-1791207_-
3.50621	1.32112	0.870185	1.51821	0.128962	0.207633	chr1:1791362-1791385_-
2.35624	0.935133	1.1271	0.82968	0.406719	0.504758	chr1:1793049-1793074_-
1.11037	-2.08765	2.10201	-0.993168	0.320628	NA	chr1:1794039-1794064_-
0.397196	2.51968	4.04372	0.623109	0.533213	NA	chr1:1795746-1795771_-
4.43276	-2.58209	1.00127	-2.57882	0.00991385	0.0292437	chr1:1797428-1797464_-
1.33444	-2.37206	1.75853	-1.34889	0.177372	0.264955	chr1:1799842-1799865_-
6.72917	-2.79303	0.850389	-3.28441	0.00102196	0.00521457	chr1:1801350-1801370_-
1.19263	-3.3681	1.94759	-1.72937	0.0837427	0.149196	chr1:1802364-1802389_-
0.885539	-1.55373	2.33116	-0.666506	0.505087	NA	chr1:1802728-1802753_-
1.83318	0.205662	1.21525	0.169234	0.865612	0.899653	chr1:1803178-1803201_-
6.70067	-0.725592	0.621936	-1.16667	0.243345	0.337666	chr1:1806659-1806749_-
1.90299	-4.05139	1.52894	-2.64979	0.00805414	0.0248054	chr1:1806786-1806811_-
1.4229	-3.62712	1.7347	-2.09092	0.0365353	0.0791266	chr1:1808712-1808736_-
1.74038	-3.92895	1.55692	-2.52353	0.0116182	0.0329209	chr1:1811923-1811956_-
2.55687	-3.3722	1.4228	-2.37011	0.0177827	0.0456186	chr1:1812300-1812342_-
1.97064	-4.1122	1.50151	-2.73872	0.00616789	0.0202454	chr1:1812667-1812737_-
1.8455	-1.79905	1.41925	-1.26761	0.204937	0.296427	chr1:1812943-1812966_-
0.969957	-3.08938	2.22907	-1.38595	0.165761	NA	chr1:1813750-1813773_-
2.31909	0.697327	1.05341	0.661969	0.507991	0.599622	chr1:1814536-1814561_-
3.02311	-1.95293	1.09157	-1.78911	0.0735972	0.135248	chr1:1815467-1815472_-
3.41602	-1.18482	0.953537	-1.24255	0.214034	0.306732	chr1:1815767-1815790_-
0.660871	-2.52193	3.07671	-0.819683	0.412397	NA	chr1:1816626-1816649_-
3.58713	-1.76837	0.963936	-1.83453	0.0665749	0.125021	chr1:1817044-1817069_-
1.65748	-1.62775	1.47132	-1.10632	0.268588	0.363954	chr1:1820149-1820174_-
1.07951	-3.24678	2.06912	-1.56916	0.116611	NA	chr1:1821410-1821435_-
1.48077	-3.69817	1.68361	-2.19657	0.0280514	0.0646696	chr1:1821549-1821572_-
2.31478	-2.25154	1.3374	-1.68352	0.0922749	0.160319	chr1:1821687-1821720_-
1.46961	-3.68912	1.68386	-2.19088	0.0284608	0.0652234	chr1:1821903-1821928_-
1.07344	-2.0068	2.00408	-1.00136	0.316655	NA	chr1:1822044-1822069_-
8.5976	-3.6734	0.92044	-3.99092	6.58187e-05	0.000694418	chr1:1886154-1886188_-
5.42118	-1.78544	0.785454	-2.27312	0.0230186	0.0556863	chr1:1915219-1915244_-
12.4878	-2.55276	0.591785	-4.31366	1.60572e-05	0.000245518	chr1:1915556-1915595_-
2.65727	-4.55016	1.42239	-3.19896	0.00137922	0.00652394	chr1:1945317-1945342_-
10.3298	-3.17658	0.73837	-4.30215	1.69149e-05	0.00025526	chr1:1945496-1945504_-
2.09172	-0.575633	1.17151	-0.491358	0.623174	0.700821	chr1:1945594-1945617_-
2.33831	5.05312	1.47048	3.43637	0.000589574	0.00345229	chr1:1996520-1996527_+
1.81161	-3.97245	1.5521	-2.55941	0.0104849	0.0304937	chr1:1997062-1997069_+
0.879969	-2.94122	2.40154	-1.22472	0.22068	NA	chr1:2072035-2072042_+
1.17368	-2.10609	1.9191	-1.09744	0.272451	0.367561	chr1:2095279-2095286_+
1.28274	-0.0670686	1.65173	-0.0406052	0.967611	0.977079	chr1:2106821-2106828_+
29.737	-4.51827	0.638603	-7.07524	1.49193e-12	5.17501e-10	chr1:2114415-2114423_-
17.9356	-2.791	0.521288	-5.35405	8.6007e-08	4.57507e-06	chr1:2114613-2114638_-
1.54223	-3.74398	1.64675	-2.27355	0.0229931	0.055649	chr1:2116889-2116914_-
1.24957	4.16233	1.91038	2.1788	0.0293468	0.0668013	chr1:2118695-2118720_-
3.35782	-2.81526	1.21957	-2.3084	0.0209767	0.0519627	chr1:2118787-2118810_-
20.3178	-4.24404	0.701572	-6.04933	1.45453e-09	1.69843e-07	chr1:2123070-2123111_+
14.4602	-2.57407	0.559022	-4.60459	4.13284e-06	8.94242e-05	chr1:2123117-2123151_-
1.26181	-2.29913	1.81498	-1.26675	0.205243	0.296678	chr1:2125660-2125683_-
1.78266	-1.75437	1.45034	-1.20963	0.226422	0.320249	chr1:2125737-2125760_-
27.7602	-4.70719	0.691631	-6.80593	1.00396e-11	2.63828e-09	chr1:2138022-2138046_-
0.635715	-0.866204	3.24134	-0.267236	0.789287	NA	chr1:2138989-2139012_-
1.76829	2.01887	1.4684	1.37488	0.169169	0.256037	chr1:2162109-2162116_+
3.36422	-3.81392	1.36566	-2.79274	0.00522642	0.0178386	chr1:2164310-2164346_+
1.27869	-0.287574	1.64189	-0.175148	0.860963	0.896327	chr1:2164522-2164529_+
1.61152	-2.63017	1.59757	-1.64636	0.0996902	0.169266	chr1:2165874-2165908_+
1.61127	-3.81903	1.62233	-2.35405	0.0185703	0.0471386	chr1:2167690-2167697_+
1.19834	-0.961987	1.8063	-0.532573	0.594329	0.676946	chr1:2168832-2168839_+
4.25397	2.23472	0.858873	2.60192	0.00927033	0.0277226	chr1:2170656-2170689_+
2.89112	-4.65692	1.37866	-3.37786	0.000730518	0.0040322	chr1:2171948-2171956_+
2.42098	0.662335	1.14657	0.577668	0.563488	0.649557	chr1:2175180-2175187_+
0.954581	-1.71888	2.18301	-0.787389	0.431054	NA	chr1:2175799-2175806_+
1.17169	-3.34609	1.93923	-1.72548	0.0844413	0.149923	chr1:2175856-2175863_+
0.933634	-1.68386	2.23993	-0.751744	0.452205	NA	chr1:2176579-2176586_+
2.88295	-1.78217	1.11131	-1.60366	0.108789	0.180985	chr1:2176982-2176989_+
1.8771	2.6599	1.43485	1.85378	0.06377	0.120933	chr1:2177076-2177083_+
1.10417	-2.04633	2.0003	-1.02301	0.306304	NA	chr1:2177453-2177460_+
1.71502	4.65794	1.63221	2.85377	0.00432041	0.0155157	chr1:2177780-2177787_+
1.10326	2.86474	2.02829	1.41239	0.157835	NA	chr1:2179810-2179817_+
1.02177	-1.93735	2.08693	-0.928325	0.353239	NA	chr1:2180542-2180549_+
2.23404	5.01106	1.48646	3.37115	0.000748564	0.00410688	chr1:2183613-2183620_+
1.06519	-0.962158	2.10942	-0.456125	0.6483	NA	chr1:2184123-2184130_+
2.90228	-4.66116	1.37626	-3.38684	0.000707022	0.00394504	chr1:2185998-2186036_+
1.46493	-2.52491	1.68182	-1.5013	0.133278	0.213028	chr1:2186668-2186676_+
3.31693	5.5702	1.37134	4.06185	4.86845e-05	0.000554536	chr1:2186754-2186761_+
1.81119	-1.81326	1.44898	-1.2514	0.210788	0.303203	chr1:2186885-2186892_+
6.02488	3.93084	0.977754	4.02027	5.81306e-05	0.000631592	chr1:2186956-2187017_+
4.98126	1.79767	0.745904	2.41005	0.0159502	0.0419599	chr1:2187242-2187249_+
4.97283	1.35508	0.725576	1.86759	0.0618198	0.118096	chr1:2187289-2187324_+
3.27326	2.95986	1.09692	2.69835	0.00696847	0.022277	chr1:2187517-2187527_+
2.01947	3.78958	1.52132	2.49098	0.0127391	0.0352372	chr1:2191432-2191439_+
0.915635	2.57776	2.41133	1.06902	0.285059	NA	chr1:2191730-2191737_+
1.01756	-0.623772	1.96921	-0.316762	0.751424	NA	chr1:2193432-2193439_+
1.54389	-1.64625	1.57234	-1.04701	0.295097	0.390973	chr1:2193800-2193807_+
6.22497	6.47768	1.27699	5.07263	3.92363e-07	1.49882e-05	chr1:2194256-2194289_+
1.30243	-2.24403	1.8257	-1.22913	0.219023	0.312479	chr1:2194340-2194347_+
4.08334	-1.17082	0.845747	-1.38437	0.166247	0.252666	chr1:2194891-2194943_+
4.27657	5.97214	1.34236	4.44897	8.62817e-06	0.000154941	chr1:2195026-2195033_+
4.11013	-1.64982	0.889015	-1.85579	0.0634838	0.120493	chr1:2195173-2195177_+
2.00814	-1.35946	1.27798	-1.06375	0.28744	0.383253	chr1:2195382-2195415_+
1.10326	2.86474	2.02829	1.41239	0.157835	NA	chr1:2195496-2195503_+
0.620364	-2.43916	3.21698	-0.758213	0.448323	NA	chr1:2195875-2195882_+
2.15576	0.243854	1.10179	0.221326	0.824839	0.868176	chr1:2195951-2195958_+
2.11641	0.794746	1.17801	0.674654	0.499896	0.592836	chr1:2196251-2196258_+
8.6647	-0.805081	0.560948	-1.43522	0.151226	0.234194	chr1:2197495-2197502_+
2.27995	-1.33864	1.18751	-1.12727	0.25963	0.354673	chr1:2197900-2197955_+
5.23139	3.67664	1.00114	3.67245	0.000240235	0.00178292	chr1:2198522-2198555_+
5.20608	-0.130873	0.685998	-0.190777	0.8487	0.886803	chr1:2200323-2200361_+
2.11242	-1.27302	1.2193	-1.04406	0.296457	0.392232	chr1:2201908-2201916_+
1.66259	-0.841854	1.46062	-0.576367	0.564367	0.650363	chr1:2211545-2211552_+
0.991154	-1.76697	2.11563	-0.835196	0.403607	NA	chr1:2213961-2213968_+
1.00487	-1.79732	2.25185	-0.798156	0.42478	NA	chr1:2216903-2216937_+
2.80057	-3.53756	1.38942	-2.54606	0.0108946	0.0313284	chr1:2217225-2217276_+
0.531762	-2.21047	3.96992	-0.556803	0.577662	NA	chr1:2218776-2218783_+
1.65341	-2.66261	1.6042	-1.65977	0.0969609	0.166104	chr1:2220145-2220152_+
1.57356	-2.60384	1.64665	-1.58129	0.113812	0.187629	chr1:2220729-2220736_+
0.828295	-2.86244	2.73182	-1.04782	0.294723	NA	chr1:2220912-2220919_+
1.22503	-1.20924	1.81338	-0.66684	0.504874	0.597055	chr1:2222083-2222090_+
1.11187	-1.98211	1.9868	-0.997636	0.318456	NA	chr1:2225151-2225158_+
3.36764	5.61815	1.37215	4.0944	4.23265e-05	0.000502304	chr1:2226851-2226860_+
6.7546	1.26987	0.612179	2.07435	0.0380467	0.0814845	chr1:2227584-2227630_+
2.08033	-3.11652	1.48996	-2.09168	0.0364672	0.0790193	chr1:2228056-2228065_+
1.74595	-2.76559	1.54877	-1.78567	0.0741522	0.135984	chr1:2228485-2228518_+
4.8089	0.875998	0.743222	1.17865	0.238538	0.332437	chr1:2234391-2234424_+
1.32479	-1.36232	1.70599	-0.798551	0.424551	0.521279	chr1:2234446-2234453_+
1.64923	-0.875026	1.38669	-0.631019	0.528028	0.616926	chr1:2235482-2235489_+
0.963895	-1.81448	2.17631	-0.833739	0.404428	NA	chr1:2235876-2235883_+
3.15211	-4.78048	1.35732	-3.522	0.000428307	0.00272086	chr1:2237505-2237515_+
4.97323	4.24341	1.16236	3.65067	0.000261556	0.00189021	chr1:2239187-2239194_+
3.96141	-1.0737	0.860744	-1.24741	0.212247	0.304869	chr1:2239772-2239805_+
1.83062	-2.85072	1.52618	-1.86788	0.0617789	0.118038	chr1:2302161-2302186_-
2.87713	-3.56902	1.37825	-2.58954	0.00961054	0.0285175	chr1:2302730-2302764_-
1.15074	-3.32417	1.95928	-1.69663	0.0897666	0.157165	chr1:2314514-2314537_-
1.21557	-2.15602	1.87338	-1.15087	0.249786	0.344189	chr1:2316176-2316201_-
1.17321	-2.16666	1.88666	-1.14841	0.250799	0.344915	chr1:2316265-2316290_-
1.6001	-3.81094	1.61405	-2.3611	0.018221	0.0464371	chr1:2317426-2317451_-
1.13296	-0.854372	1.83221	-0.466306	0.640996	0.715289	chr1:2320793-2320818_-
1.31753	-2.26963	1.89397	-1.19834	0.230783	0.32486	chr1:2322255-2322280_-
0.489869	-2.0993	3.95447	-0.530867	0.595511	NA	chr1:2323708-2323715_+
1.70301	-0.040501	1.33533	-0.0303303	0.975804	0.982947	chr1:2324853-2324860_+
0.693124	-1.21523	2.79392	-0.434957	0.663594	NA	chr1:2325053-2325060_+
1.77667	-2.78638	1.54703	-1.80112	0.0716844	0.132419	chr1:2329426-2329435_+
4.22606	0.849983	0.760404	1.11781	0.26365	0.358375	chr1:2330899-2330907_+
3.08831	-2.76123	1.26534	-2.18221	0.0290942	0.0663724	chr1:2331434-2331442_+
2.35028	0.73929	1.05009	0.704026	0.481416	0.576429	chr1:2332307-2332314_+
1.50172	-3.71435	1.6779	-2.21369	0.02685	0.0625025	chr1:2332633-2332640_+
13.5813	-2.63431	0.585641	-4.49818	6.85391e-06	0.000129979	chr1:2332744-2332751_+
16.8862	-2.28223	0.492657	-4.6325	3.61284e-06	8.07696e-05	chr1:2332754-2332765_+
2.40498	4.0662	1.46109	2.78299	0.00538599	0.0182402	chr1:2334660-2334667_+
1.36412	4.31219	1.88851	2.28338	0.0224081	0.0546424	chr1:2442190-2442215_-
2.36585	-3.28612	1.43631	-2.28788	0.0221443	0.0542197	chr1:2447075-2447099_-
1.62319	-0.484509	1.47128	-0.329311	0.741921	0.800498	chr1:2450842-2450867_-
0.57847	-2.34444	3.76189	-0.623208	0.533148	NA	chr1:2451790-2451815_-
4.53142	-1.78852	0.872176	-2.05065	0.0403014	0.0852869	chr1:2454003-2454030_-
1.47812	0.308319	1.51779	0.203136	0.839029	0.87941	chr1:2487972-2487979_+
2.73021	0.569762	1.00489	0.56699	0.570721	0.656286	chr1:3164959-3164966_+
0.468922	-2.04075	3.97773	-0.513043	0.607921	NA	chr1:3246424-3246431_+
0.631531	-2.46327	3.49129	-0.705546	0.480471	NA	chr1:3328907-3328914_+
0.745263	-1.21422	2.64649	-0.458803	0.646375	NA	chr1:3546010-3546017_+
9.66175	-1.14303	0.545508	-2.09535	0.0361402	0.0785129	chr1:3546087-3546094_+
3.30973	-2.78002	1.21485	-2.28837	0.0221158	0.0541622	chr1:3546235-3546270_+
1.1214	-3.29385	2.02262	-1.62851	0.103417	0.17389	chr1:3547843-3547868_-
1.35028	-3.56602	1.76691	-2.01823	0.0435675	0.0904697	chr1:3548223-3548246_-
3.88121	1.07373	0.811731	1.32277	0.185913	0.274217	chr1:3548732-3548757_-
5.42549	0.116243	0.662562	0.175445	0.86073	0.896167	chr1:3549689-3549762_-
6.79668	-0.86474	0.647364	-1.33579	0.181619	0.269692	chr1:3549829-3549864_-
9.5325	3.51458	0.715199	4.91413	8.9179e-07	2.80869e-05	chr1:3549897-3549943_-
1.36511	0.757903	1.64997	0.459344	0.645987	0.719723	chr1:3550049-3550072_-
1.15074	-3.32417	1.95928	-1.69663	0.0897666	0.157165	chr1:3551220-3551245_-
1.33189	0.36003	1.62984	0.220899	0.825171	0.868434	chr1:3551381-3551404_-
3.20407	-0.842232	0.938354	-0.897563	0.369418	0.466252	chr1:3551839-3551873_-
11.8429	-2.25583	0.570567	-3.95366	7.6964e-05	0.000775745	chr1:3552319-3552361_-
8.81686	2.73847	0.651991	4.20017	2.6672e-05	0.000357465	chr1:3552406-3552439_-
7.33621	1.22269	0.594856	2.05543	0.0398372	0.0844793	chr1:3552479-3552521_-
2.09732	-1.25653	1.20959	-1.0388	0.298897	0.394887	chr1:3552576-3552601_-
4.4927	4.08135	1.17882	3.46222	0.000535739	0.00321398	chr1:3552685-3552710_-
1.48918	0.0643174	1.51267	0.0425191	0.966085	0.976071	chr1:3552753-3552776_-
2.17993	-2.04565	1.34288	-1.52333	0.127676	0.205978	chr1:3552977-3553000_-
2.65664	-3.43755	1.40287	-2.45036	0.0142712	0.0385464	chr1:3561249-3561272_-
1.29443	-0.0535017	1.64261	-0.032571	0.974017	0.981734	chr1:3561490-3561513_-
3.01816	5.41327	1.40272	3.85913	0.00011379	0.0010354	chr1:3563042-3563067_-
1.68414	-0.130439	1.38185	-0.0943941	0.924796	0.945482	chr1:3565685-3565710_-
1.00068	-3.12816	2.15455	-1.45189	0.146533	NA	chr1:3571432-3571439_+
0.850879	-1.47888	2.37136	-0.623641	0.532863	NA	chr1:3574848-3574855_+
1.07192	-3.21289	2.10568	-1.52582	0.127055	NA	chr1:3641527-3641534_+
1.55924	-0.736452	1.43064	-0.51477	0.606714	0.687274	chr1:3653316-3653341_-
1.20328	4.12073	1.95034	2.11283	0.034615	0.0763415	chr1:3655095-3655120_-
0.662258	-2.52673	3.355	-0.753122	0.451377	NA	chr1:3657497-3657522_-
0.771807	-2.74956	2.70679	-1.0158	0.309724	NA	chr1:3658954-3658979_-
0.866118	-0.242191	2.35106	-0.103014	0.917952	NA	chr1:3661018-3661043_-
2.98055	4.40046	1.39492	3.15465	0.00160693	0.00728546	chr1:3697901-3697926_-
0.973675	-1.82916	2.19047	-0.835058	0.403685	NA	chr1:3702891-3702916_-
10.3723	-2.89612	0.695158	-4.16613	3.09817e-05	0.00039838	chr1:3729131-3729163_-
12.5026	-3.20822	0.690169	-4.64845	3.34434e-06	7.60872e-05	chr1:3729318-3729342_-
2.48684	-1.75175	1.19207	-1.4695	0.141697	0.22268	chr1:3729913-3729936_-
18.1663	-3.54113	0.619059	-5.72018	1.06414e-08	8.55499e-07	chr1:3730030-3730055_-
9.57654	-3.39285	0.823792	-4.11857	3.81227e-05	0.000463774	chr1:3730057-3730058_-
20.361	-2.00537	0.431247	-4.65016	3.31673e-06	7.56044e-05	chr1:3730276-3730319_-
7.38134	-2.61777	0.78721	-3.32538	0.000882986	0.00465929	chr1:3730423-3730430_-
0.631531	-2.46327	3.49129	-0.705546	0.480471	NA	chr1:3732309-3732334_-
1.67286	-2.75094	1.57243	-1.74948	0.0802084	0.144297	chr1:3741139-3741164_-
0.670651	-2.54248	3.31875	-0.766098	0.443618	NA	chr1:3743926-3743951_-
3.29611	1.1658	0.89312	1.30531	0.191787	0.281192	chr1:3745933-3745956_-
5.78094	3.01352	0.845238	3.56528	0.000363462	0.00240552	chr1:3750600-3750625_-
1.45562	-2.47166	1.70219	-1.45204	0.14649	0.22832	chr1:3752018-3752041_-
0.57847	-2.34444	3.76189	-0.623208	0.533148	NA	chr1:3752643-3752668_-
3.90879	3.25465	1.07122	3.03826	0.00237947	0.00979962	chr1:3753902-3753936_-
1.38671	-1.29063	1.62413	-0.794658	0.426813	0.523233	chr1:3754970-3754995_-
0.609197	-2.41404	3.57413	-0.675422	0.499408	NA	chr1:3756630-3756655_-
7.30856	-3.47151	0.94321	-3.68052	0.000232755	0.0017401	chr1:3756845-3756850_-
1.64377	-1.60774	1.47342	-1.09117	0.2752	0.370544	chr1:3759631-3759656_-
3.03849	-2.68883	1.23318	-2.18041	0.0292272	0.0666382	chr1:3759995-3760019_-
1.65748	-1.62775	1.47132	-1.10632	0.268588	0.363954	chr1:3760046-3760069_-
2.76651	1.06566	1.02294	1.04176	0.297524	0.393327	chr1:3761426-3761451_-
3.05562	-0.97548	0.963	-1.01296	0.31108	0.407134	chr1:3762046-3762071_-
4.86526	2.75219	0.864945	3.18192	0.001463	0.00680489	chr1:3763431-3763456_-
4.84619	-1.51206	0.802816	-1.88344	0.0596401	0.115225	chr1:3763466-3763505_-
2.78587	2.60693	1.16499	2.23773	0.0252387	0.0596279	chr1:3763704-3763729_-
1.12722	-0.60066	1.94227	-0.309257	0.757126	0.812955	chr1:3763772-3763795_-
3.81237	3.79672	1.20213	3.15832	0.0015868	0.00722725	chr1:3764171-3764206_-
4.43164	0.0093535	0.740214	0.0126362	0.989918	0.993057	chr1:3764453-3764477_-
2.25006	-3.17532	1.48922	-2.1322	0.0329903	0.0735667	chr1:3764530-3764555_-
2.28473	-0.357572	1.094	-0.32685	0.743782	0.80212	chr1:3764611-3764636_-
4.68479	4.13276	1.17074	3.53003	0.000415515	0.00265889	chr1:3764653-3764677_-
3.44805	-1.00106	0.90998	-1.10009	0.271293	0.366527	chr1:3764823-3764856_-
5.73021	-1.50566	0.75516	-1.99383	0.0461704	0.0944927	chr1:3765871-3765903_-
4.47081	1.7229	0.845625	2.03743	0.0416071	0.0872373	chr1:3767928-3767953_-
2.04351	-3.01002	1.48852	-2.02216	0.04316	0.0898909	chr1:3771074-3771110_-
3.66491	-3.95686	1.33135	-2.97206	0.00295808	0.0115938	chr1:3771267-3771299_-
3.73643	-1.76481	0.997951	-1.76843	0.0769885	0.139715	chr1:3777036-3777043_+
6.03777	-3.78124	1.13038	-3.3451	0.000822524	0.00441688	chr1:3777642-3777694_+
1.54392	4.44259	1.7165	2.58817	0.00964879	0.0286002	chr1:3780990-3780997_+
1.97774	-1.96938	1.39999	-1.40671	0.159513	0.244274	chr1:3781285-3781314_+
1.30218	-3.49756	1.81371	-1.92839	0.0538061	0.106642	chr1:3782297-3782304_+
2.9184	-3.64023	1.41189	-2.57828	0.00992949	0.0292828	chr1:3784363-3784370_+
0.639924	-2.47987	3.42684	-0.723659	0.469275	NA	chr1:3788884-3788891_+
5.53434	-1.58604	0.75335	-2.10532	0.0352638	0.0772634	chr1:3789627-3789662_+
2.66901	-1.86035	1.15556	-1.60991	0.107418	0.179119	chr1:3800509-3800516_+
56.8222	-4.59204	0.487483	-9.4199	4.515e-21	1.62483e-17	chr1:3800679-3800686_+
15.0938	-4.1032	0.784078	-5.23315	1.66645e-07	7.66676e-06	chr1:3801357-3801371_+
17.9823	-3.75437	0.654434	-5.73682	9.64695e-09	7.94536e-07	chr1:3801376-3801385_+
27.0797	-3.07389	0.455607	-6.7468	1.51147e-11	3.69815e-09	chr1:3806217-3806256_-
1.27007	-3.46761	1.86784	-1.85649	0.0633843	0.120324	chr1:3814281-3814306_-
2.2837	-2.19946	1.31544	-1.67203	0.0945177	0.163141	chr1:3821678-3821717_+
3.59021	-0.333452	0.840882	-0.396551	0.691699	0.758587	chr1:3830443-3830450_+
3.41848	-2.28007	1.082	-2.10728	0.0350936	0.0769646	chr1:3830496-3830504_+
7.98176	-1.51983	0.62455	-2.43348	0.0149544	0.0399759	chr1:3833732-3833770_+
0.651091	-2.50262	3.09341	-0.809017	0.418506	NA	chr1:5674757-5674782_-
0.7802	-2.76323	2.88222	-0.958717	0.337701	NA	chr1:5728194-5728218_-
0.480089	-2.07268	3.97619	-0.521273	0.602177	NA	chr1:5923464-5923489_-
0.620615	-0.799279	3.30251	-0.242021	0.808764	NA	chr1:5982160-5982185_-
3.51681	-1.65118	1.00238	-1.64727	0.0995034	0.169018	chr1:5984769-5984793_-
3.07415	-0.616791	0.921432	-0.669383	0.503251	0.595603	chr1:6010684-6010708_-
1.09486	-1.96666	1.97716	-0.994688	0.319888	NA	chr1:6012894-6012919_-
2.00417	-2.99064	1.57849	-1.89462	0.0581431	0.112995	chr1:6023803-6023826_-
2.92184	-4.66771	1.37823	-3.38674	0.000707277	0.00394569	chr1:6025038-6025094_-
1.83034	-1.70612	1.42216	-1.19967	0.230268	0.32432	chr1:6032999-6033022_-
2.64134	4.20152	1.42657	2.94518	0.00322763	0.0123555	chr1:6044089-6044114_-
1.29254	-2.33043	1.78288	-1.30712	0.191173	0.280429	chr1:6044382-6044407_-
2.36462	-1.4163	1.18764	-1.19254	0.23305	0.327243	chr1:6173462-6173487_-
2.08576	-3.06581	1.47415	-2.07971	0.037552	0.0807165	chr1:6245914-6245939_-
5.67418	5.3771	1.29038	4.16708	3.08524e-05	0.000397086	chr1:6246544-6246569_-
8.32238	5.03793	1.11819	4.50543	6.62397e-06	0.000126751	chr1:6246881-6246911_-
1.96504	-2.96778	1.49233	-1.98869	0.0467357	0.095338	chr1:6247290-6247324_-
5.0309	0.727452	0.698723	1.04112	0.297821	0.393651	chr1:6247359-6247385_-
2.34784	3.06897	1.34111	2.28838	0.0221153	0.0541622	chr1:6247781-6247806_-
2.04064	-0.198751	1.16988	-0.16989	0.865096	0.899275	chr1:6248159-6248184_-
3.39574	1.84261	0.940783	1.95859	0.0501603	0.100882	chr1:6250350-6250383_-
2.45822	-1.05499	1.1015	-0.95778	0.338174	0.435097	chr1:6250755-6250780_-
0.681818	-2.56481	3.2471	-0.789877	0.4296	NA	chr1:6251191-6251216_-
2.22022	-1.33166	1.21514	-1.09589	0.273126	0.368337	chr1:6251929-6251962_-
2.30489	-1.41358	1.19319	-1.1847	0.236135	0.330235	chr1:6252338-6252363_-
4.46301	2.32652	0.874509	2.66038	0.00780531	0.0242268	chr1:6253113-6253138_-
1.61346	-3.79642	1.66793	-2.27613	0.022838	0.0553952	chr1:6253547-6253572_-
2.4627	-4.41369	1.43278	-3.08052	0.00206641	0.00886716	chr1:6253631-6253680_-
4.0837	-2.42695	1.02139	-2.37613	0.0174953	0.0450019	chr1:6256979-6257012_-
1.76752	-3.96871	1.5834	-2.50644	0.0121952	0.0341282	chr1:6257177-6257200_-
3.73797	2.32904	0.923367	2.52233	0.011658	0.0330093	chr1:6257720-6257745_-
7.17093	1.6472	0.654745	2.51579	0.0118765	0.0334915	chr1:6257808-6257848_-
4.21885	-0.585305	0.790007	-0.740885	0.458763	0.553704	chr1:6257958-6257991_-
1.40613	-2.38932	1.72868	-1.38216	0.166922	0.253441	chr1:6259292-6259317_-
5.30719	0.702277	0.70549	0.995447	0.319519	0.415727	chr1:6259607-6259664_-
0.8334	-1.55503	2.43045	-0.639812	0.522295	NA	chr1:6275445-6275452_+
6.70326	-2.79434	0.868272	-3.21828	0.00128962	0.00618476	chr1:6279721-6279737_+
20.457	-3.49978	0.579446	-6.03988	1.54231e-09	1.78245e-07	chr1:6280076-6280107_+
12.4024	-3.16805	0.698765	-4.53378	5.79366e-06	0.000114972	chr1:6282363-6282399_-
7.6743	-5.05768	1.24952	-4.0477	5.17239e-05	0.000580196	chr1:6283317-6283321_-
5.04404	-2.83525	0.983479	-2.88287	0.00394066	0.0144116	chr1:6283409-6283434_-
1.87085	-1.73482	1.41985	-1.22183	0.221772	0.315459	chr1:6283459-6283484_-
0.870439	-1.51543	2.49288	-0.607901	0.543253	NA	chr1:6288907-6288930_-
1.98397	-0.563108	1.23284	-0.456757	0.647846	0.721394	chr1:6289982-6290006_-
1.50375	-0.483304	1.44742	-0.333907	0.73845	0.797449	chr1:6290514-6290537_-
1.20328	4.12073	1.95034	2.11283	0.034615	0.0763415	chr1:6291898-6291923_-
2.25747	-0.425806	1.16018	-0.367019	0.713605	0.776724	chr1:6294142-6294165_-
1.24985	2.1238	1.81682	1.16897	0.242416	0.336717	chr1:6298476-6298483_+
4.42966	-2.15005	0.930422	-2.31083	0.0208422	0.0516948	chr1:6298532-6298605_+
1.7631	-1.7406	1.42677	-1.21996	0.222482	0.316187	chr1:6315768-6315791_-
0.824085	-1.43725	2.44318	-0.58827	0.556351	NA	chr1:6327746-6327771_-
1.27007	-3.46761	1.86784	-1.85649	0.0633843	0.120324	chr1:6376779-6376804_-
1.23467	-2.235	1.86471	-1.19858	0.230692	0.324757	chr1:6381626-6381651_-
1.3008	-3.49611	1.85322	-1.8865	0.0592274	0.1146	chr1:6387887-6387912_-
2.2274	-1.26924	1.25573	-1.01077	0.312128	0.408221	chr1:6412992-6413017_-
0.718746	-2.65518	3.09028	-0.859202	0.390229	NA	chr1:6426769-6426794_-
1.48648	-1.43732	1.55334	-0.925309	0.354805	0.45141	chr1:6430898-6430923_-
2.28763	-2.20805	1.32215	-1.67004	0.0949119	0.163529	chr1:6432645-6432684_-
3.68461	-3.01836	1.20876	-2.49706	0.0125228	0.0348631	chr1:6439552-6439624_-
7.70919	-3.07578	0.833808	-3.68884	0.000225279	0.0016973	chr1:6472641-6472663_-
7.16834	-4.96443	1.2544	-3.95762	7.5701e-05	0.000766119	chr1:6475934-6475957_-
7.02214	-1.71493	0.68584	-2.50048	0.0124025	0.034607	chr1:6477797-6477862_-
1.08308	-3.22844	2.21715	-1.45612	0.145359	NA	chr1:6526737-6526762_-
1.66527	-2.71665	1.65048	-1.64598	0.0997678	0.169369	chr1:6537989-6538014_-
1.02341	-0.613746	1.96161	-0.312878	0.754373	NA	chr1:6539719-6539744_-
34.95	-3.35754	0.439228	-7.64418	2.10281e-14	1.36899e-11	chr1:6582149-6582179_-
4.05835	-0.129304	0.805559	-0.160515	0.872475	0.904944	chr1:6582416-6582441_-
35.214	-3.20595	0.426176	-7.52258	5.37053e-14	3.07866e-11	chr1:6582537-6582571_-
3.96166	-1.98305	0.95023	-2.08692	0.0368958	0.0796934	chr1:6583008-6583033_-
20.0647	-2.83006	0.503179	-5.62437	1.86188e-08	1.34644e-06	chr1:6583409-6583428_-
6.76332	-1.94833	0.769273	-2.53269	0.011319	0.0322934	chr1:6583561-6583584_-
1.92668	-0.220128	1.2352	-0.178213	0.858555	0.894522	chr1:6585253-6585278_-
1.27159	-2.30859	1.82494	-1.26502	0.205864	0.297377	chr1:6588245-6588270_-
0.854347	-1.59594	2.53292	-0.630079	0.528643	NA	chr1:6589620-6589643_-
2.69449	4.27106	1.44139	2.96314	0.00304516	0.0118628	chr1:6592141-6592166_-
0.57847	-2.34444	3.76189	-0.623208	0.533148	NA	chr1:6593006-6593029_-
1.00625	-1.79928	2.11713	-0.849868	0.395399	NA	chr1:6593230-6593253_-
1.71184	-3.88609	1.61024	-2.41336	0.0158061	0.0416465	chr1:6594007-6594030_-
0.781587	-2.76535	2.6519	-1.04278	0.297049	NA	chr1:6598540-6598563_-
1.20466	-0.786682	1.84402	-0.426612	0.669662	0.73973	chr1:6598963-6598988_-
2.94446	-2.70663	1.26477	-2.14002	0.0323534	0.0723587	chr1:6599583-6599616_-
2.8101	-4.62798	1.39257	-3.32333	0.000889491	0.00468426	chr1:6599665-6599689_-
7.2644	-2.94195	0.842276	-3.49286	0.000477883	0.00295149	chr1:6601136-6601151_-
1.68807	-2.69314	1.612	-1.67068	0.094784	0.163465	chr1:6601473-6601496_-
2.46365	-0.958699	1.08869	-0.880601	0.378534	0.475777	chr1:6602489-6602514_-
3.19007	-2.11218	1.07986	-1.95598	0.0504675	0.101419	chr1:6602586-6602611_-
5.9718	-2.24799	0.804829	-2.79312	0.00522018	0.0178233	chr1:6603002-6603030_-
1.16811	-3.36698	1.98199	-1.69879	0.089359	0.156782	chr1:6603323-6603346_-
4.62919	-0.370926	0.727674	-0.509742	0.610232	0.690249	chr1:6603602-6603636_-
2.66368	-0.105732	0.994605	-0.106306	0.91534	0.938195	chr1:6604383-6604437_-
11.3813	3.37382	0.63801	5.28804	1.23634e-07	6.0833e-06	chr1:6605241-6605264_-
3.96029	1.35276	0.805702	1.67898	0.0931564	0.161362	chr1:6605361-6605384_-
2.34668	-1.54508	1.17849	-1.31107	0.189834	0.278975	chr1:6605482-6605507_-
2.5892	4.18325	1.43181	2.92166	0.00348174	0.0130792	chr1:6605585-6605611_-
2.41023	-0.877059	1.09399	-0.801705	0.422723	0.519599	chr1:6606368-6606392_-
1.36319	0.728099	1.51816	0.479593	0.631517	0.707949	chr1:6606437-6606470_-
3.71552	1.01782	0.829589	1.22689	0.219863	0.313446	chr1:6606526-6606551_-
4.6753	-2.75147	1.00113	-2.74836	0.00598937	0.0198	chr1:6606748-6606774_-
3.35025	-0.812082	0.899847	-0.902467	0.366809	0.463557	chr1:6607052-6607076_-
2.505	5.1621	1.44747	3.56629	0.00036207	0.00239864	chr1:6607570-6607595_-
2.71187	-0.689823	1.02065	-0.675867	0.499125	0.592157	chr1:6607686-6607711_-
2.30932	-3.23076	1.44755	-2.23188	0.0256229	0.0602817	chr1:6607897-6607922_-
1.95466	-4.08141	1.53971	-2.65077	0.00803078	0.0247481	chr1:6608369-6608392_-
1.74925	-0.255775	1.27176	-0.20112	0.840605	0.880564	chr1:6608504-6608529_-
3.8068	2.72729	0.968945	2.8147	0.00488231	0.0170169	chr1:6608741-6608766_-
1.17169	-3.34609	1.93923	-1.72548	0.0844413	0.149923	chr1:6612620-6612645_-
1.7966	0.230028	1.30095	0.176815	0.859653	0.895302	chr1:6640403-6640410_+
2.86295	-1.41072	1.03851	-1.35841	0.174333	0.261548	chr1:6641491-6641498_+
4.12827	-5.18598	1.3179	-3.93503	8.31861e-05	0.000818749	chr1:6641668-6641703_+
1.11605	-0.583142	1.87672	-0.310725	0.75601	0.812116	chr1:6642342-6642349_+
1.24275	0.0292093	1.74312	0.0167569	0.986631	0.990578	chr1:6643356-6643363_+
1.28149	-2.22133	1.83894	-1.20794	0.227072	0.32078	chr1:6643743-6643750_+
4.75463	-1.85627	0.880103	-2.10915	0.034932	0.0767661	chr1:6643838-6643871_+
1.97764	0.664102	1.20834	0.5496	0.582594	0.666814	chr1:6645951-6645958_+
2.48692	-0.47617	1.07258	-0.443948	0.65708	0.729089	chr1:6645970-6645977_+
5.503	-0.327338	0.673275	-0.486188	0.626834	0.703752	chr1:6654645-6654670_-
11.032	-1.96306	0.560998	-3.49923	0.00046661	0.0029073	chr1:6654700-6654735_-
34.9537	-1.63527	0.335565	-4.87317	1.09819e-06	3.28477e-05	chr1:6655087-6655112_-
4.07436	-3.15672	1.18096	-2.67301	0.00751735	0.023583	chr1:6676187-6676220_+
2.82718	-3.55077	1.41196	-2.51479	0.0119104	0.0335459	chr1:6681036-6681044_+
2.059	-1.18611	1.23632	-0.959395	0.33736	0.434253	chr1:6681191-6681230_+
0.912687	-1.64459	2.43006	-0.676772	0.498551	NA	chr1:6682941-6682948_+
0.901166	-1.5732	2.46234	-0.638903	0.522886	NA	chr1:6686394-6686401_+
0.850628	-2.89815	2.66216	-1.08864	0.276311	NA	chr1:6692217-6692224_+
1.51989	-3.72685	1.69735	-2.19569	0.028114	0.0647662	chr1:6694130-6694139_+
1.07951	-3.24678	2.06912	-1.56916	0.116611	NA	chr1:6694345-6694352_+
13.615	-3.61368	0.736278	-4.90804	9.1989e-07	2.87795e-05	chr1:6697578-6697589_-
4.10757	-4.1346	1.32264	-3.12602	0.00177187	0.00785431	chr1:6703372-6703407_-
1.83062	-2.85072	1.52618	-1.86788	0.0617789	0.118038	chr1:6703990-6704013_-
1.61966	-3.8238	1.6196	-2.36096	0.0182278	0.0464371	chr1:6704237-6704260_-
1.10464	-1.97898	1.98608	-0.996425	0.319044	NA	chr1:6704696-6704719_-
1.129	1.69731	1.88254	0.901604	0.367267	0.464043	chr1:6706044-6706069_-
2.01035	-0.449902	1.18849	-0.37855	0.705022	0.769645	chr1:6707023-6707046_-
1.01046	-3.13983	2.14108	-1.46647	0.14252	NA	chr1:6707408-6707431_-
0.802673	-1.49703	2.47362	-0.605197	0.545048	NA	chr1:6707565-6707590_-
0.455182	2.69373	4.02842	0.668682	0.503698	NA	chr1:6707614-6707637_-
1.91163	-2.9013	1.52925	-1.89721	0.0578001	0.112477	chr1:6707664-6707687_-
1.65355	-1.61495	1.46446	-1.10276	0.27013	0.365296	chr1:6707780-6707805_-
4.58872	-0.452275	0.759964	-0.595127	0.551759	0.638516	chr1:6708078-6708112_-
1.14806	-0.893555	1.82117	-0.49065	0.623674	0.701098	chr1:6708192-6708217_-
4.87687	-2.26227	0.9074	-2.49313	0.0126622	0.0351047	chr1:6708257-6708300_-
5.15015	0.331109	0.720405	0.459615	0.645792	0.71955	chr1:6708745-6708770_-
6.32874	-1.4911	0.699094	-2.13291	0.0329322	0.0734609	chr1:6709089-6709127_-
1.23652	-2.18004	1.87044	-1.16552	0.243807	0.338072	chr1:6709923-6709946_-
3.65899	-2.35191	1.05038	-2.2391	0.0251492	0.0594501	chr1:6710400-6710425_-
3.67168	-1.88024	0.96914	-1.94011	0.0523667	0.104552	chr1:6710502-6710526_-
4.93052	2.73263	0.860904	3.17413	0.00150284	0.00693609	chr1:6711002-6711027_-
16.0074	1.15484	0.42089	2.74381	0.006073	0.0200261	chr1:6711785-6711800_-
1.84015	-4.01449	1.53167	-2.62099	0.00876745	0.0264761	chr1:6711966-6711991_-
4.93583	-0.732185	0.732283	-0.999865	0.317376	0.41366	chr1:6712575-6712609_-
2.66249	-3.43753	1.4024	-2.45118	0.0142389	0.0384922	chr1:6712660-6712684_-
2.30844	-3.20851	1.45217	-2.20946	0.0271423	0.0630599	chr1:6712981-6713006_-
6.62179	-1.62832	0.700824	-2.32343	0.0201561	0.0502968	chr1:6713685-6713701_-
3.89131	-3.07763	1.19101	-2.58405	0.00976466	0.0288806	chr1:6714884-6714902_-
0.739693	-2.6938	2.77055	-0.972298	0.330902	NA	chr1:6715014-6715039_-
0.541542	-2.23498	3.96887	-0.563127	0.573348	NA	chr1:6716152-6716175_-
1.40206	-0.314815	1.61234	-0.195254	0.845194	0.883938	chr1:6722234-6722259_-
1.83876	-4.0126	1.54875	-2.59086	0.00957354	0.028422	chr1:6726502-6726525_-
3.33619	-2.18137	1.06919	-2.04021	0.0413291	0.0868822	chr1:6727810-6727860_-
0.630144	-2.45941	3.17633	-0.774294	0.438757	NA	chr1:6731946-6731969_-
0.891386	-1.55358	2.32092	-0.669383	0.503251	NA	chr1:6737361-6737384_-
1.55957	-1.3893	1.53664	-0.904113	0.365936	0.462737	chr1:6737583-6737608_-
4.11115	1.03013	0.7857	1.3111	0.189825	0.278971	chr1:6738481-6738506_-
7.04833	0.586636	0.615326	0.953374	0.340401	0.437211	chr1:6752010-6752046_-
1.6548	-0.100189	1.33363	-0.0751255	0.940115	0.956877	chr1:6753171-6753196_-
0.906486	-1.59412	2.42503	-0.657362	0.510948	NA	chr1:6753814-6753837_-
1.65397	-3.84909	3.69687	-1.04117	0.297795	0.393618	chr1:6753949-6753973_-
1.78241	-2.85644	1.53844	-1.85671	0.0633522	0.120324	chr1:6754784-6754807_-
1.21978	-3.42025	1.88099	-1.81832	0.0690146	0.12851	chr1:6754928-6754953_-
2.89368	-1.42359	1.03596	-1.37417	0.169388	0.256303	chr1:6758752-6758786_-
1.98137	2.71736	1.40425	1.9351	0.0529782	0.105446	chr1:6760757-6760782_-
0.833865	-1.45517	2.57129	-0.56593	0.571441	NA	chr1:6761294-6761317_-
2.75387	-3.49815	1.40004	-2.49861	0.0124682	0.034742	chr1:6845533-6845608_+
1.61304	-1.58282	1.50466	-1.05195	0.292824	0.388705	chr1:6846940-6846947_+
1.22655	-0.36552	1.77197	-0.20628	0.836573	0.877514	chr1:6848199-6848206_+
0.510816	-2.15567	3.81762	-0.564665	0.572302	NA	chr1:6849891-6849898_+
1.33911	-3.55572	1.78183	-1.99555	0.0459831	0.0941771	chr1:6858561-6858568_+
2.31784	-0.300256	1.09367	-0.274541	0.783669	0.835115	chr1:6860234-6860241_+
1.39078	-3.59984	1.73062	-2.08008	0.0375179	0.0806601	chr1:6860340-6860347_+
5.05652	-1.99642	0.833375	-2.39559	0.0165937	0.0431751	chr1:6860406-6860430_+
2.8291	-1.36992	1.10862	-1.2357	0.21657	0.309608	chr1:6867729-6867736_+
0.3901	-1.76347	3.9926	-0.441686	0.658716	NA	chr1:6878313-6878320_+
2.00352	4.86081	1.52707	3.1831	0.00145707	0.00678576	chr1:6887032-6887039_+
1.79874	3.60874	1.57108	2.29697	0.0216203	0.0532606	chr1:6889893-6889900_+
1.95388	-2.96042	1.5106	-1.95976	0.0500241	0.100643	chr1:6894142-6894149_+
1.81373	2.74051	1.48861	1.84098	0.0656245	0.123543	chr1:6894697-6894704_+
1.12373	-2.07396	2.13262	-0.972492	0.330806	0.42739	chr1:6895164-6895171_+
1.75573	-2.77196	1.5508	-1.78744	0.0738667	0.135587	chr1:6895447-6895455_+
0.403043	2.53736	4.04208	0.627737	0.530176	NA	chr1:6901365-6901372_+
0.670651	-2.54248	3.31875	-0.766098	0.443618	NA	chr1:6902268-6902275_+
4.12108	-1.30325	0.846813	-1.53901	0.123802	0.201103	chr1:6903797-6903831_+
1.20754	2.97255	1.93397	1.53702	0.124289	0.2017	chr1:6904680-6904687_+
1.72079	-1.57802	1.46336	-1.07835	0.280878	0.376535	chr1:6911838-6911845_+
1.79623	-2.79976	1.56466	-1.78938	0.0735542	0.135204	chr1:6912017-6912024_+
0.870189	-2.92742	2.39965	-1.21994	0.222488	NA	chr1:6916216-6916223_+
3.10942	-1.43729	0.994341	-1.44547	0.148325	0.230584	chr1:6920913-6920947_+
1.5325	2.42712	1.62306	1.49539	0.134812	0.214653	chr1:6921942-6921949_+
0.77042	-2.74627	2.68224	-1.02387	0.305897	NA	chr1:6922276-6922283_+
1.5478	-2.55051	1.66689	-1.53011	0.12599	0.203881	chr1:6922875-6922884_+
0.978614	3.82603	2.39168	1.59972	0.10966	NA	chr1:6923170-6923177_+
1.4539	-1.53928	1.71432	-0.897895	0.369242	0.466081	chr1:6925428-6925435_+
1.49422	0.427276	1.46078	0.292498	0.769906	0.823636	chr1:6927248-6927255_+
1.50653	-3.73911	1.73351	-2.15696	0.0310088	0.0698132	chr1:6927866-6927873_+
0.920476	-2.99921	2.51812	-1.19105	0.233633	NA	chr1:6928274-6928281_+
3.08498	5.50483	1.40349	3.92224	8.77298e-05	0.000851625	chr1:6931344-6931351_+
8.90373	5.08374	1.10239	4.61155	3.99685e-06	8.71921e-05	chr1:6931975-6932016_+
2.12391	4.96235	1.52575	3.2524	0.00114436	0.00565713	chr1:6932089-6932096_+
6.4341	3.57852	0.876804	4.08132	4.47798e-05	0.000523902	chr1:6932138-6932181_+
1.14852	-0.711593	1.99205	-0.357217	0.72093	0.782838	chr1:6934936-6934943_+
1.89991	-1.77496	1.41639	-1.25315	0.21015	0.302439	chr1:6935359-6935366_+
2.35482	-2.34202	1.3499	-1.73496	0.082748	0.147735	chr1:6935603-6935611_+
1.57099	-0.456875	1.41622	-0.322603	0.746996	0.804809	chr1:6936681-6936688_+
1.28744	-3.50779	1.87277	-1.87305	0.0610608	0.11713	chr1:6941644-6941651_+
0.609197	-2.41404	3.57413	-0.675422	0.499408	NA	chr1:6943183-6943190_+
1.18438	-2.18017	1.91579	-1.138	0.25512	0.349731	chr1:6944085-6944092_+
1.14905	-0.669093	2.0223	-0.330858	0.740752	0.799534	chr1:6946092-6946099_+
1.74075	3.5763	1.5895	2.24995	0.0244521	0.0581246	chr1:6946374-6946381_+
1.93469	3.75905	1.53305	2.45201	0.014206	0.03842	chr1:6947368-6947375_+
3.02769	3.45952	1.27012	2.72378	0.00645389	0.0209597	chr1:6948312-6948319_+
10.1174	-3.95939	0.912299	-4.34001	1.42475e-05	0.000225032	chr1:6953292-6953299_+
1.03155	-1.94968	2.19549	-0.888039	0.37452	NA	chr1:6954941-6954948_+
0.878595	2.49212	2.50076	0.996548	0.318984	NA	chr1:6955075-6955082_+
1.61152	-2.63017	1.59757	-1.64636	0.0996902	0.169266	chr1:6956732-6956739_+
1.98749	-0.447173	1.20641	-0.370664	0.710888	0.774424	chr1:6958559-6958566_+
2.04911	-1.30632	1.24596	-1.04845	0.294433	0.39035	chr1:6965562-6965569_+
0.510816	-2.15567	3.81762	-0.564665	0.572302	NA	chr1:6968863-6968870_+
0.749473	-2.71044	2.97486	-0.911117	0.362234	NA	chr1:6986331-6986338_+
1.02163	-3.15397	2.13506	-1.47723	0.139614	NA	chr1:7037487-7037494_+
0.589637	-2.37077	3.67583	-0.644962	0.518952	NA	chr1:7344160-7344167_+
0.641311	-2.48313	3.15157	-0.787902	0.430754	NA	chr1:7456310-7456317_+
1.52888	0.367551	1.4682	0.25034	0.802324	0.850309	chr1:7768885-7768892_+
0.739693	-2.6938	2.77055	-0.972298	0.330902	NA	chr1:7770395-7770402_+
3.59587	-3.91999	1.33118	-2.94475	0.00323212	0.0123701	chr1:7770597-7770631_+
1.02581	-1.82778	2.12093	-0.861781	0.388808	NA	chr1:7772564-7772571_+
1.57041	-0.746598	1.40567	-0.531134	0.595326	0.677799	chr1:7773470-7773477_+
1.02024	-3.15152	2.15747	-1.46075	0.144084	NA	chr1:7775205-7775212_+
0.902441	-1.71813	2.26528	-0.758465	0.448173	NA	chr1:7780194-7780201_+
0.7802	-2.76323	2.88222	-0.958717	0.337701	NA	chr1:7784106-7784113_+
1.69367	-3.87499	1.60418	-2.41556	0.0157109	0.0414521	chr1:7784824-7784831_+
0.510816	-2.15567	3.81762	-0.564665	0.572302	NA	chr1:7789275-7789282_+
3.72576	-5.01421	1.33507	-3.75576	0.000172819	0.00140294	chr1:7797994-7798004_+
3.28855	4.53542	1.38411	3.27676	0.00105004	0.00531945	chr1:7808723-7808730_+
1.48536	3.3645	1.7091	1.96858	0.0490013	0.0989947	chr1:7811226-7811233_+
4.51937	-3.28157	1.15399	-2.84367	0.00445967	0.0158638	chr1:7815328-7815363_+
1.19973	-0.969171	1.87197	-0.517727	0.604649	0.685464	chr1:7816746-7816753_+
1.1158	-1.99422	1.95751	-1.01875	0.30832	NA	chr1:7816847-7816854_+
2.04981	4.88253	1.51772	3.21701	0.00129534	0.00619661	chr1:7817883-7817890_+
1.7867	-1.61807	1.47206	-1.09919	0.271685	0.366903	chr1:7819158-7819165_+
0.877285	-0.26992	2.311	-0.116798	0.90702	NA	chr1:7837359-7837366_+
2.68337	5.26712	1.42287	3.70175	0.000214117	0.00163429	chr1:7838065-7838072_+
1.29811	-1.14095	1.67453	-0.681354	0.495647	0.589228	chr1:7838456-7838463_+
1.29836	-0.0748037	1.66509	-0.0449246	0.964167	0.974548	chr1:7840895-7840902_+
0.839462	-2.88174	2.494	-1.15547	0.247898	NA	chr1:7862530-7862537_+
0.828295	-2.86244	2.73182	-1.04782	0.294723	NA	chr1:7868231-7868238_+
2.74813	-1.18877	1.05441	-1.12742	0.259563	0.354601	chr1:8023136-8023143_+
3.83082	-1.7805	0.969436	-1.83663	0.0662638	0.124534	chr1:8025983-8026011_+
0.872076	0.147126	2.49665	0.0589295	0.953008	NA	chr1:8026591-8026598_+
3.49619	-1.22187	0.937156	-1.30381	0.1923	0.281836	chr1:8026712-8026747_+
3.58469	-0.584279	0.851943	-0.685818	0.492828	0.586717	chr1:8027905-8027953_+
3.63617	-2.96421	1.20626	-2.45735	0.0139965	0.0379727	chr1:8031935-8031943_+
0.489869	-2.0993	3.95447	-0.530867	0.595511	NA	chr1:8032387-8032394_+
3.95688	-3.07207	1.17219	-2.6208	0.00877242	0.0264886	chr1:8033049-8033053_+
0.989517	-3.11363	2.20009	-1.41523	0.157001	NA	chr1:8038769-8038776_+
2.16013	0.00110657	1.18459	0.000934133	0.999255	0.999451	chr1:8074267-8074320_-
1.5987	1.64473	1.4339	1.14703	0.251368	0.345533	chr1:8074456-8074481_-
0.73155	-1.16889	2.88556	-0.405084	0.685416	NA	chr1:8080128-8080153_-
2.00352	4.86081	1.52707	3.1831	0.00145707	0.00678576	chr1:8084789-8084814_-
0.803138	-1.39129	2.67202	-0.520686	0.602585	NA	chr1:8085707-8085732_-
1.81354	1.46516	1.30798	1.12017	0.262642	0.357361	chr1:8266612-8266645_-
3.84791	1.74295	0.859294	2.02835	0.0425249	0.0888216	chr1:8415176-8415210_-
5.19121	-5.49798	1.29516	-4.24501	2.18583e-05	0.00030764	chr1:8420537-8420550_-
1.2463	-2.1903	1.83442	-1.194	0.232478	0.326565	chr1:8420675-8420698_-
1.02316	-1.93927	2.20682	-0.878761	0.379531	NA	chr1:8420773-8420798_-
0.916266	-1.6117	2.43589	-0.661647	0.508198	NA	chr1:8421989-8422012_-
0.729913	-2.67688	2.80022	-0.955954	0.339095	NA	chr1:8422058-8422083_-
0.96857	-3.08565	2.40031	-1.28552	0.198609	NA	chr1:8423508-8423533_-
2.23346	4.00285	1.49961	2.66927	0.00760164	0.0237574	chr1:8423734-8423759_-
0.76064	-2.7301	2.68876	-1.01537	0.309928	NA	chr1:8424554-8424579_-
0.918283	-3.01749	2.51228	-1.2011	0.229714	NA	chr1:8424633-8424658_-
0.662397	-1.13984	2.88791	-0.394694	0.693069	NA	chr1:8424794-8424817_-
3.39834	-2.15493	1.10638	-1.94772	0.0514479	0.103051	chr1:8426886-8426924_-
1.71943	-3.91542	1.57093	-2.49241	0.0126879	0.0351426	chr1:8430143-8430166_-
0.708966	-2.63863	2.89427	-0.911673	0.361941	NA	chr1:8432597-8432622_-
2.37156	-1.56488	1.181	-1.32505	0.185155	0.27337	chr1:8440621-8440644_-
1.16205	-2.15295	1.92167	-1.12035	0.262564	0.357361	chr1:8440701-8440724_-
1.08087	-0.535344	2.11822	-0.252733	0.800474	NA	chr1:8446497-8446522_-
2.45767	1.63312	1.10685	1.47546	0.14009	0.220975	chr1:8446898-8446921_-
0.771946	-1.43608	2.56322	-0.560264	0.5753	NA	chr1:8448966-8448989_-
2.08147	-0.641556	1.15302	-0.556411	0.57793	0.662881	chr1:8450597-8450620_-
1.08929	-3.25776	2.03768	-1.59875	0.109875	NA	chr1:8451885-8451910_-
3.57113	-2.96287	1.20731	-2.45411	0.0141233	0.0382467	chr1:8460358-8460406_-
0.7802	-2.76323	2.88222	-0.958717	0.337701	NA	chr1:8460468-8460493_-
2.93872	-2.62863	1.24559	-2.11035	0.0348283	0.0766077	chr1:8461633-8461669_-
1.95311	-1.10508	1.283	-0.861325	0.389059	0.487045	chr1:8463662-8463687_-
2.30207	0.704443	1.0719	0.657192	0.511057	0.602537	chr1:8471595-8471620_-
2.66169	-0.55574	1.03332	-0.537819	0.590702	0.673963	chr1:8472971-8472996_-
2.16606	0.537401	1.16283	0.46215	0.643973	0.717865	chr1:8473449-8473472_-
2.27389	-0.752473	1.11952	-0.672138	0.501496	0.594149	chr1:8474021-8474044_-
5.76451	0.0501535	0.663746	0.0755612	0.939768	0.956641	chr1:8474742-8474776_-
1.45764	0.462504	1.43927	0.321347	0.747948	0.805501	chr1:8475717-8475740_-
1.44576	-0.546584	1.48053	-0.369182	0.711992	0.775304	chr1:8478336-8478361_-
2.85264	-1.84512	1.11898	-1.64893	0.0991615	0.168628	chr1:8478427-8478451_-
1.09827	1.78651	1.91984	0.930551	0.352086	NA	chr1:8479075-8479098_-
1.56509	-0.73109	1.42768	-0.512081	0.608594	0.688856	chr1:8479576-8479599_-
2.94944	-0.474685	0.950996	-0.499145	0.617677	0.69613	chr1:8480043-8480068_-
6.25284	3.58037	0.895813	3.99678	6.42089e-05	0.000680621	chr1:8480984-8481009_-
1.07522	0.239006	1.94389	0.122953	0.902145	NA	chr1:8482109-8482132_-
6.15314	1.79814	0.671701	2.67699	0.0074286	0.0233813	chr1:8482729-8482778_-
4.69726	-1.8116	0.862113	-2.10135	0.0356101	0.0777284	chr1:8482832-8482855_-
1.82491	-1.83152	1.44788	-1.26497	0.205884	0.297392	chr1:8488121-8488145_-
1.74052	-2.82699	1.58916	-1.77892	0.0752535	0.137459	chr1:8505603-8505626_-
2.61627	-2.44833	1.28478	-1.90563	0.0566976	0.110932	chr1:8506781-8506806_-
1.89766	3.72926	1.55679	2.39549	0.0165983	0.0431751	chr1:8509331-8509356_-
1.01046	-3.13983	2.14108	-1.46647	0.14252	NA	chr1:8509418-8509443_-
2.39056	-0.978622	1.09725	-0.891885	0.372454	0.469407	chr1:8517871-8517896_-
2.21613	0.362588	1.13752	0.318753	0.749914	0.807161	chr1:8521840-8521863_-
1.13689	-0.876626	1.83032	-0.478948	0.631976	0.708153	chr1:8523429-8523452_-
1.69112	-0.911894	1.37525	-0.663074	0.507283	0.59908	chr1:8523817-8523840_-
4.51201	3.0083	0.929904	3.23507	0.00121614	0.0059225	chr1:8525134-8525157_-
3.70493	-2.30598	1.04337	-2.21011	0.0270972	0.0629704	chr1:8525547-8525580_-
0.641311	-2.48313	3.15157	-0.787902	0.430754	NA	chr1:8528951-8528974_-
2.1532	-2.09739	1.33976	-1.56549	0.117467	0.192584	chr1:8530377-8530401_-
2.02603	-3.03409	1.50761	-2.01252	0.0441653	0.0913824	chr1:8530526-8530559_-
2.33831	5.05312	1.47048	3.43637	0.000589574	0.00345229	chr1:8537551-8537576_-
1.12526	-1.04851	2.0457	-0.512545	0.60827	0.688561	chr1:8538116-8538141_-
3.58077	-3.91378	1.33357	-2.93481	0.00333756	0.0126784	chr1:8540242-8540273_-
1.98567	-2.05405	1.39831	-1.46895	0.141847	0.222803	chr1:8545183-8545206_-
1.36996	4.31893	1.80543	2.3922	0.0167479	0.0434413	chr1:8546807-8546832_-
1.39176	3.208	1.77049	1.81192	0.0699985	0.129937	chr1:8547003-8547028_-
1.32373	-2.30911	1.78722	-1.29202	0.196351	0.286182	chr1:8548074-8548099_-
2.45286	5.14298	1.4504	3.54589	0.000391287	0.00253649	chr1:8548703-8548728_-
2.44701	5.14093	1.4585	3.5248	0.000423797	0.00269862	chr1:8554255-8554280_-
1.58218	-2.60693	1.71346	-1.52144	0.128149	0.206569	chr1:8555428-8555453_-
2.51084	5.16391	1.44406	3.57598	0.000348925	0.00234252	chr1:8563640-8563665_-
1.54868	-2.57878	1.66366	-1.55006	0.121127	0.197433	chr1:8567211-8567236_-
2.7058	-2.56885	1.28091	-2.00548	0.0449118	0.0925523	chr1:8567846-8567881_-
2.46622	-2.35421	1.29809	-1.8136	0.0697395	0.129568	chr1:8567955-8567980_-
4.56435	-1.43688	0.828271	-1.7348	0.0827762	0.147778	chr1:8569224-8569285_-
1.49612	-2.50632	1.65349	-1.51577	0.129577	0.208383	chr1:8569656-8569679_-
3.21894	-2.17697	1.12353	-1.93762	0.0526696	0.105011	chr1:8570130-8570153_-
1.10616	-0.832138	1.88227	-0.442094	0.658421	NA	chr1:8572616-8572639_-
0.459142	-2.01322	3.97909	-0.505951	0.612891	NA	chr1:8576167-8576190_-
2.00312	-0.451119	1.17979	-0.382373	0.702185	0.767306	chr1:8583118-8583143_-
0.918283	-3.01749	2.51228	-1.2011	0.229714	NA	chr1:8589417-8589442_-
3.05515	-1.02334	0.974097	-1.05055	0.293464	0.389388	chr1:8590577-8590602_-
3.71524	-2.30099	1.05721	-2.17648	0.0295194	0.0670857	chr1:8591285-8591333_-
1.07951	-3.24678	2.06912	-1.56916	0.116611	NA	chr1:8593056-8593079_-
3.73022	2.63596	1.01969	2.58507	0.00973599	0.0288155	chr1:8598775-8598800_-
4.42857	5.97842	1.33111	4.4913	7.07911e-06	0.000133314	chr1:8599123-8599148_-
3.44526	3.03645	1.08465	2.79947	0.0051186	0.0175717	chr1:8601377-8601402_-
4.49696	3.43807	1.02684	3.34819	0.000813402	0.00437684	chr1:8601866-8601891_-
0.620364	-2.43916	3.21698	-0.758213	0.448323	NA	chr1:8605397-8605422_-
6.77402	-2.46537	0.827731	-2.97847	0.00289692	0.0113913	chr1:8605789-8605821_-
1.01046	-3.13983	2.14108	-1.46647	0.14252	NA	chr1:8605907-8605932_-
2.09166	3.87538	1.52031	2.54907	0.0108012	0.0311345	chr1:8606958-8606983_-
4.41094	4.99009	1.32741	3.75926	0.000170416	0.00138665	chr1:8607434-8607459_-
2.1207	-4.21305	1.46649	-2.87289	0.00406739	0.0147791	chr1:8608778-8608801_-
2.00647	-3.02333	1.50947	-2.00291	0.0451865	0.0929801	chr1:8608952-8608977_-
2.11157	0.924954	1.15643	0.799836	0.423806	0.520645	chr1:8611096-8611121_-
1.43282	-2.49632	1.69079	-1.47642	0.139831	0.220626	chr1:8611215-8611238_-
0.962065	-0.173409	2.30415	-0.0752593	0.940008	NA	chr1:8612191-8612214_-
1.08486	-0.7194	1.99866	-0.359942	0.71889	NA	chr1:8614140-8614163_-
2.83944	-4.63828	1.38694	-3.34427	0.000825004	0.00442754	chr1:8614724-8614748_-
4.16141	-2.56626	1.02018	-2.5155	0.0118863	0.0335117	chr1:8616181-8616205_-
1.46008	-2.46972	1.6783	-1.47156	0.141139	0.222022	chr1:8619114-8619139_-
2.69506	5.27078	1.43439	3.67457	0.000238246	0.0017713	chr1:8619601-8619626_-
3.27549	-1.58183	1.00741	-1.57019	0.116371	0.191097	chr1:8619750-8619774_-
0.501035	-2.1301	3.97351	-0.536075	0.591907	NA	chr1:8621120-8621143_-
2.19285	0.518882	1.11826	0.46401	0.642641	0.716707	chr1:8622607-8622630_-
1.11048	-1.97897	1.97991	-0.999528	0.317539	NA	chr1:8625669-8625692_-
1.56935	-1.39806	1.53318	-0.911869	0.361837	0.458609	chr1:8627014-8627037_-
2.99976	-1.44389	1.01123	-1.42785	0.153336	0.236583	chr1:8629216-8629241_-
2.18774	4.97611	3.35329	1.48395	0.137822	0.218265	chr1:8630033-8630058_-
1.47878	1.59528	1.60208	0.995756	0.319369	0.415627	chr1:8631217-8631242_-
0.660871	-2.52193	3.07671	-0.819683	0.412397	NA	chr1:8634158-8634181_-
4.94599	-0.958654	0.749293	-1.27941	0.200752	0.291621	chr1:8635645-8635692_-
1.04318	-1.89483	2.08845	-0.907289	0.364254	NA	chr1:8637132-8637157_-
2.07565	-2.13777	1.37698	-1.5525	0.120543	0.196642	chr1:8637890-8637914_-
2.95205	-0.519772	1.00819	-0.51555	0.606169	0.686768	chr1:8638152-8638175_-
2.66133	-1.19627	1.05171	-1.13746	0.255345	0.349985	chr1:8640857-8640903_-
3.209	-1.53813	1.04838	-1.46715	0.142336	0.2234	chr1:8642378-8642412_-
1.37134	-0.273867	1.62274	-0.168768	0.865979	0.899919	chr1:8643693-8643716_-
3.78077	-1.97384	0.97424	-2.02603	0.0427619	0.089223	chr1:8644417-8644463_-
2.84336	-0.43227	0.972231	-0.444616	0.656597	0.72869	chr1:8644955-8644978_-
2.27825	1.10221	1.09061	1.01064	0.31219	0.408249	chr1:8647760-8647785_-
1.63817	-0.697473	1.34757	-0.517577	0.604753	0.685464	chr1:8648456-8648479_-
3.25165	2.41215	1.05264	2.29153	0.0219326	0.0538401	chr1:8650729-8650754_-
1.8404	-2.85663	1.5247	-1.87356	0.0609906	0.117098	chr1:8652449-8652474_-
2.45969	-1.71007	1.1995	-1.42565	0.153968	0.237345	chr1:8657388-8657413_-
1.93969	4.82939	1.55905	3.09764	0.00195068	0.00848834	chr1:8659581-8659606_-
1.28847	-0.301811	1.69519	-0.178039	0.858692	0.894603	chr1:8659838-8659863_-
1.62463	-3.82366	3.53943	-1.08031	0.280006	0.375838	chr1:8660079-8660104_-
2.31504	0.537369	1.09543	0.490554	0.623742	0.701165	chr1:8660588-8660611_-
2.63165	-3.47099	1.40602	-2.46866	0.0135621	0.0370596	chr1:8661305-8661330_-
3.08634	0.452671	0.95041	0.47629	0.633868	0.709768	chr1:8663813-8663838_-
3.2123	2.84784	1.12936	2.52165	0.0116806	0.0330578	chr1:8664620-8664645_-
5.28299	-1.76753	0.787285	-2.2451	0.0247616	0.05873	chr1:8664752-8664757_-
2.72328	-2.5145	1.27101	-1.97835	0.0478895	0.0971206	chr1:8665229-8665284_-
2.37066	-3.31092	1.45252	-2.27943	0.0226412	0.0550006	chr1:8665447-8665471_-
17.6768	-2.7581	0.544961	-5.06111	4.1683e-07	1.56528e-05	chr1:8665957-8665982_-
2.07907	-0.146353	1.16093	-0.126065	0.89968	0.926107	chr1:8666017-8666042_-
1.95723	4.81675	3.30661	1.4567	0.145199	0.226697	chr1:8666613-8666638_-
4.17353	-2.08493	0.947016	-2.20158	0.0276947	0.0640012	chr1:8667219-8667271_-
1.48812	-0.479349	1.43301	-0.334506	0.737998	0.797133	chr1:8667401-8667424_-
6.00001	-2.63901	0.864462	-3.05277	0.00226739	0.00946966	chr1:8667658-8667679_-
6.3229	-2.04757	0.76279	-2.68432	0.00726777	0.0230115	chr1:8667838-8667863_-
1.90094	0.236487	1.179	0.200582	0.841025	0.880901	chr1:8667997-8668020_-
2.33878	-0.31495	1.09854	-0.2867	0.774342	0.827425	chr1:8668148-8668173_-
0.739693	-2.6938	2.77055	-0.972298	0.330902	NA	chr1:8668507-8668530_-
0.739693	-2.6938	2.77055	-0.972298	0.330902	NA	chr1:8669983-8670008_-
1.1007	-1.96668	1.97093	-0.997845	0.318354	NA	chr1:8670121-8670144_-
2.37876	5.07165	1.49448	3.39359	0.000689838	0.00387415	chr1:8670802-8670827_-
2.4752	0.00872158	1.01718	0.00857427	0.993159	0.995124	chr1:8671555-8671578_-
3.48317	2.59097	1.01439	2.55422	0.0106427	0.0307824	chr1:8676642-8676667_-
3.57254	1.38855	0.881436	1.57533	0.11518	0.18947	chr1:8678584-8678607_-
3.55173	0.693902	0.845328	0.820867	0.411722	0.509355	chr1:8681856-8681879_-
4.17515	5.89793	1.32945	4.43636	9.14948e-06	0.00016146	chr1:8682880-8682905_-
0.771807	-2.74956	2.70679	-1.0158	0.309724	NA	chr1:8683476-8683499_-
5.27257	5.24554	1.29423	4.05302	5.05609e-05	0.000570214	chr1:8684066-8684091_-
4.96135	3.15516	0.910877	3.46387	0.00053246	0.00319927	chr1:8684130-8684154_-
2.76482	-0.816815	0.997061	-0.819222	0.41266	0.510225	chr1:8684244-8684280_-
5.01964	-1.3297	0.760158	-1.74924	0.0802495	0.144359	chr1:8684695-8684728_-
0.849242	-2.89618	2.47269	-1.17127	0.241492	NA	chr1:8693305-8693328_-
2.92498	-1.29963	1.02419	-1.26893	0.204466	0.295901	chr1:8693366-8693390_-
1.5059	-2.51413	1.64991	-1.5238	0.127559	0.205816	chr1:8693447-8693470_-
2.68656	-3.47284	1.42031	-2.44513	0.0144798	0.0389883	chr1:8693760-8693783_-
0.891135	-2.95766	2.35903	-1.25376	0.209928	NA	chr1:8696257-8696280_-
4.70235	-3.42329	1.17602	-2.9109	0.0036039	0.0134345	chr1:8698900-8698943_-
0.510816	-2.15567	3.81762	-0.564665	0.572302	NA	chr1:8699061-8699084_-
1.86134	-2.87014	1.51543	-1.89395	0.0582316	0.11309	chr1:8700142-8700165_-
2.14689	-2.17635	1.36766	-1.59129	0.111544	0.18464	chr1:8713509-8713557_-
2.98045	-0.938828	0.966965	-0.970902	0.331597	0.428167	chr1:8714121-8714146_-
2.99802	-1.40813	1.02863	-1.36893	0.171021	0.258255	chr1:8714753-8714777_-
4.71673	-1.43691	0.804192	-1.78678	0.0739735	0.135752	chr1:8716310-8716343_-
0.839462	-2.88174	2.494	-1.15547	0.247898	NA	chr1:8716400-8716423_-
0.714536	-1.14048	2.7278	-0.418096	0.675877	NA	chr1:8718859-8718882_-
0.631531	-2.46327	3.49129	-0.705546	0.480471	NA	chr1:8723464-8723487_-
1.26181	-2.29913	1.81498	-1.26675	0.205243	0.296678	chr1:8727553-8727586_-
1.97283	-4.08975	1.52018	-2.69031	0.00713851	0.0226868	chr1:8735491-8735514_-
5.39029	-0.709705	0.689673	-1.02905	0.303458	0.399213	chr1:8741072-8741105_-
1.86358	-0.897764	1.32466	-0.677731	0.497942	0.591052	chr1:8743281-8743306_-
2.22803	-2.09846	1.37162	-1.52991	0.126038	0.203931	chr1:8745680-8745705_-
2.05566	4.88493	1.51159	3.23165	0.00123078	0.00596533	chr1:8749777-8749802_-
4.2901	1.28159	0.772889	1.65818	0.0972807	0.166563	chr1:8750822-8750845_-
5.12358	-2.33428	0.900024	-2.59358	0.00949828	0.0282468	chr1:8751019-8751035_-
2.65479	-3.45963	1.42734	-2.42384	0.0153574	0.0407813	chr1:8752461-8752485_-
1.35205	-1.24115	1.65218	-0.751219	0.452521	0.547456	chr1:8752536-8752559_-
0.859022	-2.90988	2.64149	-1.10161	0.270633	NA	chr1:8756573-8756596_-
0.459142	-2.01322	3.97909	-0.505951	0.612891	NA	chr1:8757702-8757725_-
0.699186	-2.61913	3.16396	-0.8278	0.407784	NA	chr1:8761400-8761425_-
3.73633	1.75178	0.88087	1.9887	0.0467348	0.095338	chr1:8762126-8762151_-
1.42151	-3.62491	1.71946	-2.10817	0.0350166	0.0768192	chr1:8762328-8762353_-
4.19261	-2.53983	1.01556	-2.50091	0.0123876	0.0345731	chr1:8768426-8768448_-
1.41489	-1.30868	1.62141	-0.807125	0.419595	0.516621	chr1:8770221-8770246_-
0.459142	-2.01322	3.97909	-0.505951	0.612891	NA	chr1:8770866-8770889_-
1.1007	-1.96668	1.97093	-0.997845	0.318354	NA	chr1:8776083-8776108_-
1.40209	-2.4693	1.70914	-1.44476	0.148527	0.230752	chr1:8776321-8776344_-
4.11132	5.88498	1.32853	4.4297	9.43657e-06	0.000165301	chr1:8777281-8777306_-
2.91127	-1.28911	1.0239	-1.25902	0.208022	0.299931	chr1:8787221-8787255_-
1.18147	-3.35597	1.94368	-1.72661	0.0842376	0.149759	chr1:8787453-8787476_-
4.46366	-1.3549	0.822469	-1.64736	0.0994842	0.168996	chr1:8791910-8791935_-
0.859022	-2.90988	2.64149	-1.10161	0.270633	NA	chr1:8798220-8798245_-
1.71143	-1.7019	1.46552	-1.1613	0.245521	0.34	chr1:8798401-8798424_-
2.8559	5.36361	1.40552	3.81609	0.000135581	0.00117238	chr1:8802094-8802119_-
1.2986	-3.51913	1.8449	-1.90749	0.0564572	0.11059	chr1:8803214-8803237_-
2.23734	-2.18267	1.32648	-1.64546	0.0998743	0.169495	chr1:8803552-8803577_-
3.24456	-0.990968	0.958901	-1.03344	0.301397	0.397552	chr1:8805755-8805779_-
1.40345	-0.317134	1.53662	-0.206383	0.836492	0.877508	chr1:8806492-8806515_-
2.7522	-2.44923	1.26616	-1.93437	0.0530672	0.105567	chr1:8806915-8806938_-
3.92115	-1.97084	0.947502	-2.08004	0.0375219	0.0806672	chr1:8806971-8806995_-
2.90753	-2.67029	1.26438	-2.11193	0.0346925	0.0764525	chr1:8807113-8807146_-
3.16541	-2.77743	1.23635	-2.24648	0.0246733	0.0585771	chr1:8807867-8807900_-
0.791367	-2.78098	2.62607	-1.05899	0.289604	NA	chr1:8807927-8807952_-
0.802673	-1.49703	2.47362	-0.605197	0.545048	NA	chr1:8808406-8808429_-
1.1795	0.395307	1.82538	0.216561	0.82855	0.871159	chr1:8808533-8808556_-
2.63141	-1.14736	1.10839	-1.03516	0.300593	0.396662	chr1:8808813-8808837_-
1.82477	-2.85069	1.52751	-1.86623	0.062009	0.118323	chr1:8810018-8810041_-
1.50197	-2.50629	1.65083	-1.5182	0.128963	0.207633	chr1:8810109-8810134_-
2.63086	-0.648139	1.01036	-0.641494	0.521202	0.611055	chr1:8811550-8811583_-
2.65112	4.2015	1.42579	2.94679	0.00321091	0.0123155	chr1:8814486-8814511_-
1.04829	-0.675106	1.93731	-0.348476	0.727483	NA	chr1:8815930-8815953_-
3.95283	4.79673	1.34088	3.57731	0.000347154	0.00234124	chr1:8816017-8816042_-
1.33831	0.786164	1.57879	0.497954	0.618516	0.69692	chr1:8816182-8816205_-
2.07006	-1.31872	1.23123	-1.07106	0.284143	0.379914	chr1:8818307-8818330_-
5.12757	0.313652	0.690125	0.454486	0.649479	0.72275	chr1:8818510-8818535_-
2.29945	1.832	1.14955	1.59366	0.111011	0.183983	chr1:8818659-8818684_-
2.1919	-2.01653	1.39821	-1.44222	0.14924	0.231712	chr1:8820138-8820163_-
1.10464	-1.97898	1.98608	-0.996425	0.319044	NA	chr1:8820299-8820322_-
2.09092	2.15563	1.24868	1.72633	0.0842887	0.149831	chr1:8820441-8820466_-
1.99392	-3.01499	1.51644	-1.9882	0.0467897	0.0954219	chr1:8821726-8821749_-
1.43268	-3.63458	1.7219	-2.1108	0.0347899	0.0765656	chr1:8823457-8823482_-
1.91547	-0.040737	1.20829	-0.0337147	0.973105	0.981094	chr1:8825787-8825810_-
1.07976	-1.93816	2.018	-0.960433	0.336837	NA	chr1:8827656-8827681_-
2.17605	4.98675	1.49752	3.33	0.000868459	0.0046041	chr1:8829380-8829405_-
5.43834	-0.812443	0.714508	-1.13707	0.255511	0.350186	chr1:8829767-8829792_-
3.21645	-2.05293	1.08765	-1.88748	0.0590955	0.11442	chr1:8831330-8831353_-
1.2737	-0.948679	1.72515	-0.549911	0.58238	0.666622	chr1:8831462-8831485_-
3.20935	-3.72741	1.36367	-2.73337	0.00626894	0.0205091	chr1:8835071-8835096_-
4.65433	-3.32448	1.15273	-2.88402	0.00392639	0.0143671	chr1:8835424-8835429_-
1.8809	-2.88192	1.52858	-1.88535	0.059382	0.114845	chr1:8835540-8835564_-
3.00755	-1.99108	1.09999	-1.81009	0.070282	0.130376	chr1:8836584-8836608_-
1.45529	-1.52894	1.60847	-0.950557	0.341829	0.438564	chr1:8836653-8836678_-
3.9772	-1.12276	0.872448	-1.28691	0.198126	0.28827	chr1:8836817-8836857_-
1.42014	0.2432	1.57181	0.154726	0.877037	0.908582	chr1:8837091-8837114_-
2.70326	4.21975	1.42618	2.95878	0.00308861	0.0119908	chr1:8837418-8837443_-
6.58005	-4.83418	1.26626	-3.8177	0.000134703	0.00116896	chr1:8838977-8838982_-
1.21929	-0.994611	1.8556	-0.536006	0.591955	0.67499	chr1:8840076-8840099_-
0.73155	-1.16889	2.88556	-0.405084	0.685416	NA	chr1:8840446-8840469_-
0.933634	-1.68386	2.23993	-0.751744	0.452205	NA	chr1:8843990-8844013_-
2.0476	0.412075	1.1778	0.349868	0.726438	0.787547	chr1:8849263-8849286_-
1.50347	0.387749	1.40606	0.275769	0.782725	0.834322	chr1:8849642-8849665_-
1.68389	-3.86902	1.61783	-2.39149	0.0167801	0.0435001	chr1:8850800-8850823_-
0.641311	-2.48313	3.15157	-0.787902	0.430754	NA	chr1:8850944-8850967_-
0.902553	-1.57673	2.4315	-0.648462	0.516686	NA	chr1:8853898-8853923_-
3.10386	-0.299244	1.00433	-0.297955	0.765738	0.820234	chr1:8854784-8854807_-
4.38209	4.02245	1.17617	3.41994	0.000626344	0.00361354	chr1:8856655-8856680_-
2.80744	3.39046	1.28847	2.63138	0.00850377	0.0258151	chr1:8856932-8856957_-
2.1817	0.570023	1.16001	0.491396	0.623147	0.700815	chr1:8857976-8857999_-
6.22878	-2.2956	0.799704	-2.87056	0.0040974	0.0148635	chr1:8858208-8858243_-
1.47939	-3.69628	1.68728	-2.19067	0.0284758	0.0652234	chr1:8858283-8858308_-
2.68485	-2.56075	1.28599	-1.99127	0.0464509	0.0949582	chr1:8858343-8858386_-
0.720133	-2.65852	3.07783	-0.863764	0.387717	NA	chr1:8858979-8859002_-
1.83979	-1.07709	1.32268	-0.814321	0.415461	0.512794	chr1:8860037-8860060_-
2.17207	-0.209574	1.15287	-0.181785	0.855752	0.892372	chr1:8861088-8861111_-
2.21743	-0.320215	1.10578	-0.289584	0.772135	0.825523	chr1:8863001-8863026_-
2.01672	-2.99768	1.48512	-2.01848	0.0435415	0.0904697	chr1:8863525-8863549_-
2.2899	-2.23119	1.34973	-1.65306	0.0983182	0.167579	chr1:8863752-8863777_-
2.78929	-3.57382	1.40706	-2.53992	0.0110879	0.031767	chr1:8865168-8865193_-
1.27348	-0.0206113	1.7183	-0.0119951	0.990429	0.993232	chr1:8865680-8865703_-
2.45456	-3.30054	1.43674	-2.29723	0.0216055	0.053245	chr1:8865775-8865798_-
3.61185	-3.94019	1.34456	-2.93047	0.00338454	0.0128043	chr1:8865938-8865984_-
2.19332	-4.24903	1.46448	-2.90139	0.00371511	0.0137612	chr1:8867250-8867275_-
2.43003	-3.31323	1.42618	-2.32315	0.0201713	0.0503277	chr1:8869099-8869124_-
2.47776	2.03208	1.12112	1.81253	0.0699038	0.129806	chr1:8869820-8869845_-
5.92032	5.43327	1.28543	4.22682	2.37015e-05	0.00032656	chr1:8869884-8869917_-
1.76703	-1.75224	1.43347	-1.22237	0.221567	0.315234	chr1:8870430-8870453_-
1.72243	-0.675732	1.37686	-0.490777	0.623584	0.701098	chr1:8872702-8872725_-
3.63643	3.73979	1.23796	3.02094	0.00251995	0.0102283	chr1:8873187-8873212_-
2.66019	-3.50215	1.42673	-2.45467	0.0141015	0.0381986	chr1:8873822-8873846_-
3.81354	-0.0406367	0.823209	-0.0493638	0.960629	0.972102	chr1:8874660-8874693_-
2.00937	4.8628	1.54204	3.15348	0.00161337	0.00730285	chr1:8874905-8874930_-
3.11324	-1.52237	1.01232	-1.50384	0.132622	0.212394	chr1:8875113-8875146_-
4.9285	0.494397	0.700751	0.705525	0.480484	0.575516	chr1:8875337-8875367_-
2.64241	0.225494	1.00013	0.225466	0.821617	0.865654	chr1:8875507-8875530_-
2.72383	-3.50815	1.40062	-2.50471	0.0122551	0.0342714	chr1:8875787-8875833_-
2.89332	1.43885	0.986408	1.45867	0.144655	0.225984	chr1:8876916-8876941_-
2.15431	-1.29964	1.22304	-1.06263	0.287951	0.383745	chr1:8877006-8877031_-
0.749473	-2.71044	2.97486	-0.911117	0.362234	NA	chr1:8877304-8877329_-
8.66063	3.133	0.703292	4.45477	8.39825e-06	0.000151885	chr1:8877539-8877580_-
4.41383	0.39368	0.748608	0.525883	0.59897	0.680689	chr1:8921127-8921151_-
3.07472	5.46767	1.391	3.93073	8.46875e-05	0.000828674	chr1:8921933-8921958_-
4.25131	-4.19889	1.31379	-3.19601	0.0013934	0.0065748	chr1:8922570-8922604_-
3.4847	-1.77718	0.987734	-1.79925	0.0719791	0.132821	chr1:8922729-8922759_-
1.8517	-1.84179	1.41527	-1.30137	0.193133	0.282787	chr1:8924187-8924211_-
2.66601	-1.73975	1.13391	-1.53429	0.124958	0.202496	chr1:8924415-8924441_-
2.48905	-0.966681	1.07254	-0.901298	0.36743	0.464187	chr1:8924638-8924669_-
1.69228	-3.87282	1.58819	-2.43852	0.0147475	0.03956	chr1:8925821-8925845_-
7.66079	-2.30782	0.738125	-3.1266	0.00176839	0.00784074	chr1:8927673-8927697_-
8.22172	3.93032	0.83957	4.68134	2.85002e-06	6.79175e-05	chr1:8928098-8928122_-
3.77522	-0.155913	1.52127	-0.102489	0.918369	0.940603	chr1:8928150-8928172_-
4.23838	-1.23667	0.843882	-1.46546	0.142797	0.223975	chr1:8928821-8928860_-
11.3534	0.165444	0.469209	0.352601	0.724387	0.785839	chr1:8928941-8928974_-
6.06638	2.54381	0.762602	3.3357	0.000850863	0.00453383	chr1:8929583-8929635_-
2.87287	-1.0037	1.04768	-0.958016	0.338055	0.434979	chr1:8929875-8929899_-
2.75922	-0.333663	0.980577	-0.340272	0.733652	0.7936	chr1:8930393-8930417_-
53.2226	-1.21272	0.271317	-4.46976	7.83063e-06	0.000144095	chr1:8930568-8930590_-
6.23689	-2.74843	0.87061	-3.1569	0.00159458	0.00725075	chr1:8930748-8930762_-
6.16076	2.38897	0.730799	3.26899	0.00107933	0.00542943	chr1:8930944-8930977_-
3.1494	-1.46202	1.00988	-1.44773	0.147693	0.229793	chr1:8931596-8931628_-
5.2897	0.803567	0.683873	1.17502	0.239985	0.333972	chr1:8931706-8931731_-
5.07537	0.323002	0.698368	0.46251	0.643716	0.717633	chr1:8931931-8931967_-
2.92663	2.2459	1.06536	2.10811	0.0350216	0.0768288	chr1:8934010-8934033_-
3.9541	-0.4687	0.805562	-0.581829	0.560682	0.646941	chr1:8934366-8934391_-
5.89772	-2.28654	0.811017	-2.81935	0.00481211	0.0168238	chr1:8934444-8934467_-
6.70473	4.08624	0.961535	4.2497	2.14055e-05	0.000303014	chr1:8934844-8934877_-
4.82165	4.1726	1.16714	3.57506	0.00035015	0.00234904	chr1:8934970-8935003_-
6.36598	1.66312	0.663701	2.50583	0.0122164	0.0341774	chr1:8935060-8935083_-
7.71815	5.82473	1.26226	4.61453	3.93987e-06	8.62938e-05	chr1:8935340-8935375_-
2.63318	-2.54115	1.30453	-1.94795	0.0514208	0.103003	chr1:8935392-8935419_-
10.1545	0.560949	0.497382	1.1278	0.259403	0.354417	chr1:8935592-8935629_-
3.87055	-1.49711	0.919661	-1.6279	0.103546	0.173985	chr1:8935925-8935957_-
10.7634	3.28284	0.641807	5.115	3.13736e-07	1.25431e-05	chr1:8936351-8936415_-
5.09724	-4.43831	1.28917	-3.44276	0.000575807	0.00340011	chr1:8936842-8936877_-
16.7957	-1.18244	0.418805	-2.82337	0.00475223	0.0166713	chr1:8936952-8936984_-
2.9764	-1.90892	1.11613	-1.7103	0.0872097	0.15376	chr1:8938020-8938050_-
5.68032	-0.370794	0.662857	-0.559388	0.575897	0.661067	chr1:8938215-8938280_-
0.672177	-1.16373	3.0683	-0.379276	0.704483	NA	chr1:8938501-8938524_-
1.15227	-2.14208	1.91228	-1.12017	0.262641	0.357361	chr1:9168752-9168777_-
10.9948	-2.71629	0.64962	-4.18136	2.8977e-05	0.000380316	chr1:9169369-9169375_-
4.55736	-2.70903	1.00001	-2.70902	0.00674833	0.0217098	chr1:9169713-9169727_-
1.58472	-2.61377	1.6098	-1.62367	0.104447	0.174981	chr1:9185326-9185351_-
0.912221	-1.73356	2.25005	-0.770454	0.44103	NA	chr1:9186282-9186307_-
1.20572	-0.083766	1.69662	-0.0493724	0.960622	0.972099	chr1:9228444-9228469_-
2.14894	0.586844	1.17119	0.501068	0.616323	0.69493	chr1:9228648-9228673_-
3.10343	-0.59255	0.94722	-0.625567	0.531599	0.620194	chr1:9229441-9229466_-
1.92269	-2.97311	1.50423	-1.97651	0.0480976	0.0974563	chr1:9229567-9229602_-
1.66532	-0.779089	1.38639	-0.561954	0.574147	0.659453	chr1:9230255-9230280_-
2.0726	-4.16569	1.48541	-2.80442	0.00504078	0.0174129	chr1:9230496-9230519_-
0.803138	-1.39129	2.67202	-0.520686	0.602585	NA	chr1:9230751-9230776_-
1.00068	-3.12816	2.15455	-1.45189	0.146533	NA	chr1:9232585-9232610_-
1.78405	-1.75575	1.41912	-1.23721	0.21601	0.308947	chr1:9232683-9232708_-
4.10052	-2.45668	1.059	-2.31981	0.0203509	0.0506888	chr1:9233331-9233370_-
4.53173	-5.30457	1.29966	-4.08152	4.47421e-05	0.000523574	chr1:9233446-9233484_-
0.939481	-1.68401	2.23088	-0.754864	0.450331	NA	chr1:9233735-9233760_-
1.74758	-1.59112	1.44065	-1.10444	0.269401	0.364702	chr1:9233826-9233851_-
3.35178	-3.84477	1.34818	-2.85182	0.00434698	0.0155982	chr1:9236010-9236049_-
11.5579	-3.04984	0.686858	-4.44028	8.98421e-06	0.000159466	chr1:9236405-9236423_-
1.88313	4.74959	1.55268	3.05895	0.00222111	0.00933813	chr1:9236982-9237007_-
1.29989	0.694473	1.60531	0.432609	0.665299	0.736178	chr1:9238034-9238059_-
2.07438	-2.01829	1.35943	-1.48466	0.137633	0.21804	chr1:9238313-9238338_-
0.902302	-2.97417	2.40159	-1.23842	0.21556	NA	chr1:9240873-9240898_-
0.912333	-1.59391	2.41386	-0.660316	0.509051	NA	chr1:9241730-9241755_-
0.651091	-2.50262	3.09341	-0.809017	0.418506	NA	chr1:9242304-9242329_-
0.620364	-2.43916	3.21698	-0.758213	0.448323	NA	chr1:9243113-9243120_+
2.61082	-3.41589	1.4073	-2.42726	0.0152133	0.0405018	chr1:9243452-9243460_+
0.812314	-2.81668	2.78007	-1.01317	0.310979	NA	chr1:9301677-9301684_+
10.9254	-5.58764	1.22934	-4.54524	5.48719e-06	0.000110402	chr1:9325737-9325741_+
14.8078	-4.52376	0.887185	-5.09901	3.41437e-07	1.34452e-05	chr1:9325751-9325768_+
5.89836	-2.24252	0.806229	-2.7815	0.00541088	0.0182877	chr1:9326928-9326962_+
5.1156	-2.37494	0.895411	-2.65235	0.00799336	0.024668	chr1:9328022-9328071_+
16.0158	-2.73258	0.548448	-4.98239	6.28031e-07	2.14845e-05	chr1:9331198-9331206_+
3.40748	-2.09763	1.08304	-1.93681	0.052769	0.105186	chr1:9331251-9331258_+
1.22641	-1.21331	1.82083	-0.666351	0.505187	0.597287	chr1:9359967-9359974_+
2.82949	4.3069	1.40927	3.05613	0.00224216	0.0093931	chr1:9601755-9601762_+
1.88622	-2.88919	1.51267	-1.91	0.0561332	0.110194	chr1:9607448-9607455_+
1.6957	-0.740812	1.37907	-0.537183	0.591141	0.674303	chr1:9610226-9610233_+
1.1411	-2.12654	2.05275	-1.03595	0.300227	0.396275	chr1:9613846-9613855_+
0.468922	-2.04075	3.97773	-0.513043	0.607921	NA	chr1:9615788-9615795_+
0.77599	-1.28709	2.75809	-0.466662	0.640742	NA	chr1:9620401-9620408_+
2.26668	-2.19738	1.33567	-1.64516	0.0999375	0.169583	chr1:9627025-9627059_+
5.50562	-2.4749	0.90003	-2.74979	0.00596332	0.0197239	chr1:9627330-9627344_+
2.01112	-1.86989	1.39025	-1.345	0.178625	0.266288	chr1:9628266-9628273_+
1.6908	-0.40357	1.36219	-0.296265	0.767028	0.821317	chr1:9628441-9628448_+
2.37205	-3.313	1.4318	-2.31388	0.0206746	0.0513306	chr1:9628810-9628872_+
1.0328	-3.16836	2.19006	-1.4467	0.147982	NA	chr1:9629242-9629249_+
1.04119	-3.17668	2.10979	-1.50569	0.132148	NA	chr1:9630793-9630800_+
0.979737	-3.1017	2.19337	-1.41413	0.157325	NA	chr1:9631550-9631557_+
1.61966	-3.8238	1.6196	-2.36096	0.0182278	0.0464371	chr1:9632925-9632932_+
2.23261	5.05113	1.52404	3.31431	0.000918685	0.00480946	chr1:9633378-9633385_+
0.858225	3.61368	2.50128	1.44473	0.148532	NA	chr1:9634832-9634839_+
2.3874	-2.28805	1.30248	-1.75669	0.0789698	0.142537	chr1:9641333-9641341_+
2.33512	-3.27166	1.43519	-2.27961	0.022631	0.0549815	chr1:9641728-9641736_+
0.73155	-1.16889	2.88556	-0.405084	0.685416	NA	chr1:9659398-9659405_+
0.791367	-2.78098	2.62607	-1.05899	0.289604	NA	chr1:9666683-9666690_+
0.688019	-2.59704	3.23783	-0.802094	0.422498	NA	chr1:9746630-9746637_+
14.83	-3.18779	0.63296	-5.03632	4.74556e-07	1.73316e-05	chr1:9787976-9787983_+
2.19594	3.92316	1.48289	2.64561	0.00815433	0.025025	chr1:9790525-9790550_-
2.58228	-3.38194	1.44689	-2.33739	0.0194187	0.0489072	chr1:9790666-9790689_-
4.49657	-3.30846	1.1627	-2.84551	0.00443408	0.0158061	chr1:9790725-9790756_-
1.5523	1.25586	1.50007	0.837201	0.40248	0.500461	chr1:9792298-9792321_-
1.78449	-0.0251503	1.30265	-0.019307	0.984596	0.988966	chr1:9795579-9795604_-
2.56272	-3.37217	1.42229	-2.37095	0.0177424	0.0455323	chr1:9796906-9796929_-
1.52128	-3.72834	1.64995	-2.25966	0.0238423	0.0570531	chr1:9797123-9797146_-
4.73304	-3.40566	1.15306	-2.95359	0.00314104	0.0121287	chr1:9797248-9797253_-
7.31361	1.67568	0.634808	2.63967	0.00829867	0.0253661	chr1:9797605-9797638_-
2.67441	0.0798515	0.996118	0.0801627	0.936108	0.953874	chr1:9797742-9797766_-
0.997924	1.61814	2.13358	0.758415	0.448202	NA	chr1:9798042-9798067_-
2.48684	-1.75175	1.19207	-1.4695	0.141697	0.22268	chr1:9798757-9798805_-
5.47604	-0.17769	0.689672	-0.257644	0.796681	0.84574	chr1:9799845-9799882_-
3.52461	-2.18442	1.05809	-2.0645	0.0389702	0.0829953	chr1:9799930-9799954_-
2.57378	-3.42486	1.40662	-2.43482	0.0148991	0.0398701	chr1:9800257-9800282_-
3.44299	-2.84297	1.23042	-2.31056	0.020857	0.0517236	chr1:9800933-9800966_-
1.90534	0.314423	1.2519	0.251156	0.801693	0.849894	chr1:9803196-9803221_-
4.06907	-1.96545	0.950479	-2.06785	0.0386541	0.0824685	chr1:9803647-9803699_-
6.35941	-3.86587	1.11864	-3.45587	0.000548511	0.0032695	chr1:9804852-9804905_-
0.912082	-2.98731	2.35038	-1.27099	0.203733	NA	chr1:9804958-9804983_-
1.02898	0.667169	1.95639	0.341021	0.733088	NA	chr1:9809893-9809918_-
2.42645	4.07012	1.45204	2.80303	0.00506249	0.01746	chr1:9810039-9810064_-
1.61545	-2.63722	1.59697	-1.65139	0.0986591	0.16798	chr1:9810547-9810572_-
1.14806	-0.893555	1.82117	-0.49065	0.623674	0.701098	chr1:9812460-9812485_-
1.4173	-2.40078	1.73361	-1.38485	0.1661	0.252521	chr1:9813211-9813234_-
2.54483	-1.71014	1.1571	-1.47796	0.139419	0.22019	chr1:9814386-9814410_-
2.1967	-3.15197	1.49575	-2.10729	0.0350926	0.0769632	chr1:9817353-9817378_-
0.3901	-1.76347	3.9926	-0.441686	0.658716	NA	chr1:9820713-9820736_-
1.60188	-1.57285	1.50258	-1.04677	0.295205	0.390973	chr1:9824667-9824692_-
0.954581	-1.71888	2.18301	-0.787389	0.431054	NA	chr1:9825476-9825499_-
2.23549	-2.25249	1.35299	-1.66482	0.0959482	0.164727	chr1:9827392-9827416_-
2.46185	0.740639	1.08729	0.681178	0.495759	0.589303	chr1:9827728-9827751_-
0.879969	-2.94122	2.40154	-1.22472	0.22068	NA	chr1:9828507-9828530_-
3.6115	-3.92262	1.33183	-2.94529	0.00322653	0.0123555	chr1:9829128-9829159_-
1.34075	-2.32142	1.74906	-1.32724	0.18443	0.272648	chr1:9829182-9829204_-
2.61209	-3.46341	1.40658	-2.46228	0.0138055	0.0375757	chr1:9829231-9829255_-
4.25498	-2.48016	1.04381	-2.37607	0.0174984	0.0450087	chr1:9829859-9829884_-
1.78088	-3.95368	1.55282	-2.54613	0.0108925	0.0313236	chr1:9829981-9830004_-
2.43574	-1.56277	1.17071	-1.33489	0.181914	0.270071	chr1:9831047-9831072_-
2.35225	-0.912144	1.10264	-0.827236	0.408104	0.506024	chr1:9833275-9833300_-
1.13536	-2.01847	1.96576	-1.02681	0.304508	0.400178	chr1:9833845-9833870_-
2.47586	-3.3367	1.41587	-2.35663	0.0184415	0.0468761	chr1:9841541-9841580_-
4.2759	-1.97255	0.944938	-2.08749	0.0368438	0.0796748	chr1:9845114-9845122_-
3.47469	-3.88207	1.33966	-2.89781	0.00375777	0.013886	chr1:9853115-9853149_-
3.27102	-2.82864	1.23644	-2.28772	0.0221537	0.0542374	chr1:9855264-9855292_-
3.35263	-0.761887	0.912127	-0.835286	0.403557	0.50149	chr1:9857385-9857410_-
0.501035	-2.1301	3.97351	-0.536075	0.591907	NA	chr1:9863034-9863057_-
0.800239	3.53018	2.63513	1.33966	0.180356	NA	chr1:9864883-9864908_-
1.09486	-1.96666	1.97716	-0.994688	0.319888	NA	chr1:9869864-9869887_-
1.94153	-0.975458	1.27249	-0.766572	0.443336	0.538503	chr1:9875338-9875363_-
1.59182	-0.663501	1.41131	-0.470131	0.638262	0.713393	chr1:9876690-9876715_-
3.71053	-3.00819	1.19186	-2.52395	0.0116046	0.0329152	chr1:9878110-9878144_-
5.34461	-2.98612	1.00294	-2.97737	0.00290732	0.0114256	chr1:9878438-9878454_-
2.34083	-1.54836	1.17959	-1.31262	0.189311	0.278324	chr1:9879064-9879089_-
2.12478	-0.329698	1.16354	-0.283357	0.776903	0.829549	chr1:9881671-9881695_-
1.39217	-3.60191	1.75091	-2.05716	0.0396706	0.0841783	chr1:9914790-9914813_-
0.964361	-1.73395	2.16982	-0.799119	0.424221	NA	chr1:9914990-9915015_-
0.810927	-2.81403	2.82406	-0.996446	0.319033	NA	chr1:9926515-9926540_-
2.1263	-1.22618	1.29127	-0.949589	0.342321	0.439002	chr1:9954632-9954657_-
2.8437	0.580239	0.982507	0.59057	0.554809	0.641524	chr1:9990496-9990521_-
3.23991	-1.51802	0.983027	-1.54423	0.122533	0.199393	chr1:9991178-9991203_-
1.7602	0.380708	1.28503	0.296265	0.767027	0.821317	chr1:9991942-9991967_-
0.94901	-3.0617	2.27461	-1.34603	0.178292	NA	chr1:9995937-9995962_-
1.18346	-2.11734	1.91101	-1.10797	0.267876	0.363137	chr1:9996159-9996184_-
0.630144	-2.45941	3.17633	-0.774294	0.438757	NA	chr1:9999385-9999410_-
1.30371	-2.34223	1.7762	-1.31868	0.187277	0.27585	chr1:10008580-10008587_+
2.5994	-4.50947	1.41318	-3.19101	0.00141774	0.00666262	chr1:10012294-10012335_+
0.630144	-2.45941	3.17633	-0.774294	0.438757	NA	chr1:10014364-10014371_+
1.55062	-3.74995	1.6903	-2.21852	0.0265197	0.0618963	chr1:10024938-10024945_+
5.78966	-1.57467	0.748978	-2.10243	0.035516	0.0775593	chr1:10043364-10043386_+
13.4321	-4.98389	1.07727	-4.62641	3.72057e-06	8.25583e-05	chr1:10043587-10043591_+
14.123	-4.46326	0.89613	-4.98059	6.33893e-07	2.16425e-05	chr1:10043606-10043617_+
8.10409	-2.21334	0.682403	-3.24346	0.00118089	0.00579001	chr1:10044154-10044161_+
11.0092	-3.61178	0.808854	-4.46531	7.99525e-06	0.000146504	chr1:10064244-10064251_+
1.95194	-1.85131	1.42611	-1.29816	0.194234	0.284033	chr1:10093630-10093637_+
1.2637	-0.00693587	1.64691	-0.00421144	0.99664	0.99756	chr1:10094887-10094894_+
1.05881	-1.90661	2.16682	-0.879912	0.378907	NA	chr1:10109541-10109548_+
2.10114	-4.20361	1.47882	-2.84253	0.00447565	0.0159028	chr1:10109888-10109924_+
2.1772	-0.876614	1.18302	-0.740995	0.458697	0.553639	chr1:10117736-10117743_+
1.76449	-1.74292	1.45687	-1.19635	0.231561	0.325627	chr1:10133544-10133551_+
1.0525	-1.97906	2.04453	-0.967979	0.333055	NA	chr1:10134464-10134471_+
3.89145	-2.43974	1.04402	-2.33688	0.0194455	0.0489562	chr1:10136041-10136099_+
0.77599	-1.28709	2.75809	-0.466662	0.640742	NA	chr1:10137130-10137137_+
1.05067	-0.434268	2.1262	-0.204246	0.838161	NA	chr1:10139181-10139188_+
1.95352	-2.92784	1.52447	-1.92055	0.054788	0.108252	chr1:10139451-10139496_+
1.38671	-1.29063	1.62413	-0.794658	0.426813	0.523233	chr1:10140419-10140426_+
0.510816	-2.15567	3.81762	-0.564665	0.572302	NA	chr1:10141524-10141531_+
2.73775	-1.75248	1.18545	-1.47832	0.139322	0.220058	chr1:10142481-10142535_+
0.820152	-1.41631	2.60221	-0.544272	0.586254	NA	chr1:10142803-10142810_+
0.860408	-2.91338	2.44086	-1.19359	0.232639	NA	chr1:10158991-10158998_+
1.32512	-2.31171	1.78196	-1.29728	0.194535	0.284259	chr1:10159241-10159248_+
1.41082	0.391228	1.50606	0.259769	0.795042	0.844404	chr1:10162980-10162987_+
1.249	3.10166	1.95062	1.59008	0.111816	0.185033	chr1:10166102-10166109_+
2.69472	-1.11974	1.07157	-1.04495	0.296045	0.39178	chr1:10166838-10166847_+
1.44609	-1.21424	1.58179	-0.767636	0.442704	0.537911	chr1:10167699-10167706_+
2.3795	-0.859576	1.09172	-0.78736	0.431071	0.526816	chr1:10168403-10168410_+
1.98476	0.472117	1.16462	0.405382	0.685197	0.75313	chr1:10168951-10168958_+
1.24655	-0.852552	1.73291	-0.491975	0.622737	0.700494	chr1:10169433-10169440_+
0.672038	-2.54588	3.28722	-0.774477	0.438649	NA	chr1:10171931-10171938_+
4.52678	-0.832346	0.789192	-1.05468	0.291571	0.387614	chr1:10172642-10172676_+
2.31746	-4.34756	1.49161	-2.91468	0.00356058	0.0133053	chr1:10174765-10174799_+
2.36099	-3.25586	1.4328	-2.27237	0.023064	0.0557371	chr1:10174861-10174870_+
2.15899	-2.03271	1.34894	-1.50689	0.131838	0.211359	chr1:10175287-10175294_+
1.99239	-4.10179	1.54731	-2.65091	0.00802763	0.0247428	chr1:10175561-10175568_+
2.7965	-1.82745	1.11612	-1.63732	0.101563	0.17155	chr1:10176442-10176450_+
2.17119	-0.158209	1.14257	-0.138468	0.88987	0.918462	chr1:10177418-10177425_+
2.65756	-3.46143	1.41863	-2.43997	0.0146883	0.0394359	chr1:10180521-10180528_+
1.57672	-0.638583	1.39491	-0.457796	0.647099	0.720748	chr1:10180835-10180842_+
1.02316	-1.93927	2.20682	-0.878761	0.379531	NA	chr1:10181197-10181204_+
2.11242	-1.27302	1.2193	-1.04406	0.296457	0.392232	chr1:10181359-10181366_+
2.22234	5.00671	1.48747	3.36593	0.000762866	0.00416006	chr1:10182979-10182986_+
1.47466	0.456645	1.5335	0.29778	0.765871	0.820302	chr1:10183009-10183016_+
4.3894	-4.25831	1.3131	-3.24294	0.00118303	0.00579941	chr1:10183412-10183459_+
1.09511	-0.543072	1.97503	-0.27497	0.78334	NA	chr1:10186007-10186014_+
0.57847	-2.34444	3.76189	-0.623208	0.533148	NA	chr1:10189711-10189718_+
2.32104	-4.33073	1.47538	-2.93533	0.00333192	0.0126597	chr1:10190372-10190380_+
1.2044	-2.14262	1.86463	-1.14908	0.250521	0.344889	chr1:10191482-10191489_+
1.82278	-3.9795	1.54526	-2.57529	0.0100156	0.0294552	chr1:10191748-10191781_+
1.2312	-2.16674	1.83635	-1.17992	0.238034	0.331934	chr1:10191962-10191969_+
1.22503	-1.20924	1.81338	-0.66684	0.504874	0.597055	chr1:10193872-10193879_+
3.13826	-2.74686	1.22498	-2.24237	0.0249374	0.0590453	chr1:10194041-10194081_+
2.94498	-4.66198	1.42226	-3.27786	0.00104596	0.00530834	chr1:10194514-10194521_+
0.681818	-2.56481	3.2471	-0.789877	0.4296	NA	chr1:10195727-10195734_+
1.37566	-1.07273	1.71751	-0.624584	0.532244	0.620795	chr1:10197528-10197535_+
4.24979	-5.21477	1.31597	-3.96268	7.41127e-05	0.000755974	chr1:10199397-10199430_+
1.91861	-1.17895	1.29774	-0.908465	0.363633	0.460396	chr1:10203090-10203097_+
1.36006	-3.57416	1.75279	-2.03913	0.0414367	0.0869798	chr1:10203364-10203371_+
1.55959	-3.78142	1.67126	-2.26261	0.0236595	0.0567416	chr1:10204734-10204741_+
4.60416	1.85534	0.794787	2.33439	0.0195755	0.0491953	chr1:10204971-10205004_+
1.77301	4.69197	1.59115	2.94879	0.00319016	0.0122613	chr1:10205836-10205843_+
4.93231	0.475645	0.746236	0.637393	0.523869	0.613341	chr1:10207490-10207498_+
0.499649	-2.12546	3.97372	-0.534879	0.592734	NA	chr1:10208013-10208020_+
6.79446	-2.47394	0.794058	-3.11556	0.00183594	0.00808176	chr1:10208224-10208231_+
2.23549	-2.25249	1.35299	-1.66482	0.0959482	0.164727	chr1:10208629-10208636_+
2.53756	-2.28968	1.29048	-1.77429	0.0760147	0.138449	chr1:10208942-10208949_+
3.22697	-2.72647	1.21196	-2.24963	0.0244722	0.0581564	chr1:10210869-10210877_+
1.89043	-4.04298	1.522	-2.65635	0.00789908	0.0244324	chr1:10212261-10212268_+
2.16437	-2.10396	1.33322	-1.57811	0.114541	0.188562	chr1:10212797-10212847_+
2.78217	-3.53051	1.41508	-2.49491	0.0125988	0.0349656	chr1:10215919-10215976_+
1.45055	-1.19997	1.62098	-0.740273	0.459135	0.554049	chr1:10216982-10216989_+
1.54283	-2.57869	1.66621	-1.54764	0.121708	0.198215	chr1:10217778-10217785_+
1.84597	-1.71033	1.39614	-1.22504	0.220561	0.314191	chr1:10220742-10220749_+
1.34269	-3.53423	1.82519	-1.93637	0.0528227	0.105231	chr1:10220834-10220842_+
2.75537	1.51066	1.05546	1.43128	0.152351	0.235453	chr1:10221172-10221180_+
1.44398	-2.50658	1.67882	-1.49306	0.135423	0.215319	chr1:10221944-10221953_+
2.09617	-4.21905	1.52082	-2.7742	0.0055338	0.0185988	chr1:10222593-10222632_+
1.07391	-1.93807	2.02457	-0.957275	0.338429	NA	chr1:10223554-10223561_+
5.02159	-5.4539	1.28728	-4.23676	2.2677e-05	0.000316597	chr1:10223843-10223852_+
1.65341	-2.66261	1.6042	-1.65977	0.0969609	0.166104	chr1:10224272-10224279_+
3.74979	0.345019	0.809384	0.426273	0.669909	0.739942	chr1:10224348-10224355_+
1.29659	-2.24418	1.82993	-1.22637	0.220058	0.313641	chr1:10226980-10226987_+
4.5166	-3.27907	1.16342	-2.81848	0.00482517	0.0168576	chr1:10227112-10227155_+
1.2044	-2.14262	1.86463	-1.14908	0.250521	0.344889	chr1:10229393-10229402_+
1.28486	-0.959426	1.7632	-0.544139	0.586346	0.67011	chr1:10229443-10229450_+
3.09676	2.27964	1.08681	2.09755	0.0359452	0.0782244	chr1:10230326-10230333_+
2.83092	1.34792	1.05673	1.27556	0.202112	0.293208	chr1:10231178-10231185_+
1.81452	-2.87783	1.53322	-1.87698	0.0605203	0.116518	chr1:10237456-10237489_+
1.83876	-4.0126	1.54875	-2.59086	0.00957354	0.028422	chr1:10273915-10273949_+
1.02188	-1.81319	2.09815	-0.864188	0.387485	NA	chr1:10287635-10287642_+
2.70105	-2.41431	1.2706	-1.90013	0.057416	0.112024	chr1:10289876-10289885_+
1.14249	-2.13073	1.93868	-1.09906	0.271742	0.366903	chr1:10293958-10293965_+
0.928063	-3.03286	2.34587	-1.29285	0.196063	NA	chr1:10294370-10294377_+
0.812453	-1.51602	2.62735	-0.577016	0.563929	NA	chr1:10296269-10296276_+
4.36836	-1.06424	0.822317	-1.2942	0.195598	0.285372	chr1:10298006-10298041_+
1.0121	-1.79919	2.10955	-0.852875	0.393728	NA	chr1:10300853-10300860_+
0.499649	-2.12546	3.97372	-0.534879	0.592734	NA	chr1:10304875-10304882_+
4.15642	-3.15912	1.16879	-2.70289	0.00687403	0.0220357	chr1:10306746-10306784_+
0.871826	-1.51889	2.35376	-0.645305	0.51873	NA	chr1:10307148-10307155_+
0.75643	-1.24311	2.81301	-0.441915	0.65855	NA	chr1:10309894-10309901_+
0.551323	-2.25898	3.9325	-0.574439	0.565671	NA	chr1:10314049-10314056_+
1.65735	-2.66941	1.59681	-1.67171	0.0945818	0.163178	chr1:10317243-10317251_+
2.00352	4.86081	1.52707	3.1831	0.00145707	0.00678576	chr1:10319056-10319063_+
6.07356	0.279442	0.626833	0.4458	0.655742	0.727994	chr1:10319956-10319997_+
1.84269	4.72694	3.31354	1.42656	0.153708	0.237001	chr1:10320290-10320297_+
1.60048	4.53616	1.65486	2.74112	0.00612309	0.0201259	chr1:10320500-10320507_+
5.2611	2.08694	0.779281	2.67803	0.00740572	0.0233282	chr1:10321934-10321969_+
1.30756	4.21086	1.86596	2.25668	0.0240283	0.0573968	chr1:10323444-10323451_+
1.35025	-1.06065	1.67982	-0.631407	0.527775	0.616741	chr1:10325685-10325692_+
1.89193	-1.0293	1.30557	-0.788391	0.430468	0.526287	chr1:10327235-10327242_+
2.87462	-0.435944	0.958444	-0.454846	0.64922	0.722533	chr1:10328578-10328611_+
2.56279	3.16046	1.31123	2.41029	0.0159397	0.0419399	chr1:10328916-10328923_+
3.31852	-1.1409	0.939431	-1.21446	0.224571	0.318358	chr1:10329337-10329344_+
1.39103	-2.36947	1.75003	-1.35395	0.175751	0.263131	chr1:10329506-10329513_+
2.36961	-0.966649	1.10291	-0.87645	0.380785	0.478116	chr1:10329820-10329827_+
2.26818	-2.08953	1.32141	-1.58129	0.113812	0.187629	chr1:10330818-10330853_+
1.39392	0.678133	1.54413	0.439168	0.66054	0.732169	chr1:10331570-10331577_+
1.65262	4.56791	1.63076	2.8011	0.00509288	0.0175049	chr1:10332770-10332777_+
2.11739	2.83249	1.4016	2.0209	0.0432901	0.090083	chr1:10332910-10332917_+
1.22956	-3.42944	1.87287	-1.83111	0.0670837	0.125668	chr1:10333312-10333319_+
2.18428	-2.15247	1.377	-1.56316	0.118016	0.193256	chr1:10333373-10333380_+
20.2419	-0.216817	0.367414	-0.590115	0.555113	0.64179	chr1:10333712-10333761_+
10.194	-2.39679	0.642066	-3.73294	0.00018926	0.00150513	chr1:10334257-10334269_+
2.61369	5.2431	1.45571	3.60175	0.00031608	0.00218847	chr1:10334540-10334547_+
5.52108	2.67141	0.792777	3.36969	0.000752526	0.00412547	chr1:10334938-10334952_+
4.2303	2.83809	0.960251	2.95557	0.00312089	0.0120781	chr1:10335459-10335466_+
2.52677	-0.148926	1.0132	-0.146987	0.883143	0.913286	chr1:10335544-10335552_+
0.810927	-2.81403	2.82406	-0.996446	0.319033	NA	chr1:10335965-10335972_+
1.7853	-0.298395	1.27937	-0.233236	0.815578	0.861055	chr1:10336187-10336194_+
2.77519	2.68558	1.14107	2.35356	0.0185947	0.0471927	chr1:10336428-10336435_+
7.37788	4.8358	1.11716	4.32866	1.50018e-05	0.000233404	chr1:10338206-10338240_+
8.51321	4.00976	0.837915	4.78541	1.70642e-06	4.60512e-05	chr1:10338316-10338349_+
3.05464	4.46121	1.40053	3.18536	0.00144573	0.00675593	chr1:10338450-10338457_+
3.46647	2.21088	1.01046	2.18799	0.02867	0.0656016	chr1:10338915-10338922_+
2.68279	4.26865	1.42473	2.99612	0.00273443	0.0108796	chr1:10339041-10339048_+
2.19094	2.92687	1.37168	2.13378	0.0328612	0.0733248	chr1:10339758-10339765_+
3.27457	-1.53499	0.981796	-1.56345	0.117946	0.1932	chr1:10340356-10340404_+
4.03514	0.886326	0.840521	1.0545	0.291656	0.387712	chr1:10340902-10340909_+
4.83774	4.20901	1.17453	3.58357	0.00033893	0.00230075	chr1:10341039-10341046_+
3.45	0.99964	0.887832	1.12593	0.260193	0.355258	chr1:10341101-10341108_+
3.85913	3.86092	1.22415	3.15397	0.00161066	0.00729955	chr1:10341445-10341452_+
2.58436	4.22692	1.49045	2.836	0.00456822	0.0161685	chr1:10342230-10342237_+
4.09828	-0.258424	0.781258	-0.33078	0.740811	0.799575	chr1:10342355-10342364_+
1.07948	-0.537236	1.97393	-0.272165	0.785495	NA	chr1:10342742-10342749_+
3.47924	-0.970397	0.897267	-1.0815	0.279474	0.375286	chr1:10343209-10343216_+
1.90152	0.521211	1.23497	0.422043	0.672994	0.742675	chr1:10343549-10343556_+
1.50452	-2.5135	1.75595	-1.43142	0.152311	0.235413	chr1:10344152-10344159_+
1.03141	-3.16533	2.11343	-1.49772	0.134206	NA	chr1:10344214-10344221_+
2.02245	-3.05909	1.48109	-2.06543	0.0388825	0.0828466	chr1:10344599-10344606_+
1.59082	-1.39225	1.54453	-0.901407	0.367372	0.464119	chr1:10344782-10344789_+
1.48594	4.40284	1.71964	2.56032	0.0104575	0.0304378	chr1:10347162-10347169_+
2.01292	-1.9819	1.36443	-1.45255	0.14635	0.228182	chr1:10347368-10347375_+
6.35318	0.102932	0.61735	0.166732	0.867581	0.901233	chr1:10348146-10348179_+
1.64388	-1.44293	1.53222	-0.94172	0.346336	0.442937	chr1:10349486-10349493_+
0.871714	-1.66395	2.48074	-0.67075	0.50238	NA	chr1:10349642-10349649_+
2.37634	-2.17883	1.30713	-1.66689	0.0955371	0.164183	chr1:10349895-10349902_+
4.13085	-3.18742	1.21224	-2.62936	0.00855458	0.0259445	chr1:10350838-10350895_+
3.10196	0.448903	0.946019	0.474518	0.635131	0.710736	chr1:10351139-10351146_+
1.68669	-2.69113	1.61166	-1.66979	0.0949617	0.163529	chr1:10351533-10351540_+
2.18616	3.92316	1.48406	2.64353	0.00820472	0.0251448	chr1:10352236-10352243_+
2.46455	5.14682	1.45738	3.53155	0.00041313	0.00264578	chr1:10352454-10352461_+
1.4338	4.36624	1.76071	2.47981	0.0131452	0.0360966	chr1:10353265-10353272_+
1.78366	-3.95727	1.58659	-2.49421	0.0126239	0.0350249	chr1:10354663-10354670_+
2.12503	0.267143	1.11073	0.240512	0.809933	0.856474	chr1:10354874-10354881_+
1.29722	-3.51463	1.95777	-1.79522	0.0726181	0.133789	chr1:10355718-10355725_+
1.75171	1.80213	1.40808	1.27985	0.200598	0.291431	chr1:10356637-10356644_+
4.66679	2.38748	0.831561	2.87108	0.00409067	0.0148416	chr1:10357207-10357214_+
0.849242	-2.89618	2.47269	-1.17127	0.241492	NA	chr1:10360032-10360039_+
1.17	-0.715325	1.88204	-0.380079	0.703886	0.768745	chr1:10365537-10365544_+
7.811	-0.967001	0.605864	-1.59607	0.110473	0.183271	chr1:10367374-10367408_+
15.7738	-3.08367	0.594001	-5.19135	2.0877e-07	9.13906e-06	chr1:10367456-10367465_+
20.8936	-2.66086	0.486885	-5.46507	4.62714e-08	2.81176e-06	chr1:10367602-10367609_+
1.97175	3.81441	1.60064	2.38306	0.0171695	0.0443056	chr1:10368729-10368736_+
2.84411	-0.843842	0.985122	-0.856586	0.391674	0.48977	chr1:10371529-10371536_+
1.64677	4.56476	1.65252	2.76229	0.00573967	0.0191238	chr1:10371790-10371797_+
1.53677	-1.48456	1.60851	-0.922937	0.35604	0.452474	chr1:10373842-10373849_+
2.40083	-2.31493	1.34342	-1.72316	0.0848601	0.150516	chr1:10374162-10374198_+
1.5115	-3.7214	1.65847	-2.24388	0.02484	0.0588518	chr1:10376036-10376043_+
10.4502	-1.24686	0.527178	-2.36517	0.018022	0.0460764	chr1:10379803-10379821_+
2.99112	-0.0996806	0.931412	-0.107021	0.914772	0.937795	chr1:10380149-10380156_+
2.25538	-3.18107	1.45442	-2.18717	0.0287299	0.065709	chr1:10380962-10380989_+
2.14342	-2.09225	1.33694	-1.56496	0.117592	0.192746	chr1:10380998-10381039_+
1.27146	-3.4695	1.82694	-1.89908	0.0575538	0.112096	chr1:10381365-10381372_+
1.06516	1.61352	2.02494	0.796826	0.425552	NA	chr1:10381985-10381992_+
1.58692	-2.58421	1.70721	-1.5137	0.130101	0.209113	chr1:10382992-10382999_+
2.55018	-0.617696	1.0731	-0.575621	0.564872	0.650862	chr1:10383461-10383468_+
1.83572	-1.79264	1.42074	-1.26177	0.207032	0.298741	chr1:10384829-10384864_+
1.80178	-0.783982	1.34853	-0.581362	0.560997	0.647164	chr1:10386413-10386420_+
2.17808	-2.11817	1.33951	-1.5813	0.11381	0.187629	chr1:10388103-10388110_+
1.01603	-1.81333	2.10556	-0.861207	0.389124	NA	chr1:10388181-10388188_+
3.82759	-1.94393	0.956364	-2.03262	0.0420906	0.0881032	chr1:10389740-10389774_+
1.76474	-0.859512	1.32396	-0.649198	0.51621	0.606569	chr1:10392358-10392365_+
2.22266	-4.26312	1.47316	-2.89387	0.00380527	0.0140331	chr1:10393112-10393145_+
1.67089	-0.00674552	1.32555	-0.00508883	0.99594	0.997206	chr1:10394991-10394998_+
1.64366	-1.76425	1.54301	-1.14338	0.252879	0.347233	chr1:10395495-10395502_+
2.70427	-3.50058	1.39231	-2.51423	0.0119293	0.0335866	chr1:10400771-10400778_+
1.6586	1.70685	1.53029	1.11537	0.264691	0.359638	chr1:10403596-10403603_+
1.73071	-0.846173	1.41057	-0.599882	0.548585	0.635576	chr1:10405148-10405155_+
1.59463	4.53244	1.67049	2.71323	0.00666303	0.0214842	chr1:10405881-10405888_+
1.92479	-1.80659	1.37839	-1.31065	0.189975	0.279112	chr1:10407806-10407813_+
0.639924	-2.47987	3.42684	-0.723659	0.469275	NA	chr1:10410091-10410098_+
2.07006	-1.31872	1.23123	-1.07106	0.284143	0.379914	chr1:10411964-10411971_+
2.9404	0.0920604	0.958972	0.0959991	0.923521	0.944589	chr1:10412687-10412694_+
4.7248	1.51455	0.752689	2.01219	0.0442001	0.0914388	chr1:10412920-10412933_+
1.38592	3.20357	1.75893	1.82132	0.0685579	0.127913	chr1:10412993-10413000_+
0.960427	-1.71896	2.17445	-0.790527	0.42922	NA	chr1:10413535-10413542_+
1.70476	4.59858	1.62244	2.83436	0.00459171	0.0162213	chr1:10414642-10414649_+
2.38988	4.06816	1.45532	2.79537	0.0051841	0.0177282	chr1:10415096-10415103_+
0.889749	-2.95537	2.57024	-1.14984	0.250209	NA	chr1:10416658-10416665_+
0.620364	-2.43916	3.21698	-0.758213	0.448323	NA	chr1:10417175-10417182_+
1.1158	-1.99422	1.95751	-1.01875	0.30832	NA	chr1:10418602-10418609_+
2.04981	4.88253	1.51772	3.21701	0.00129534	0.00619661	chr1:10420132-10420141_+
3.47719	4.6572	1.36358	3.41541	0.000636854	0.00366325	chr1:10420392-10420399_+
1.41883	-1.32413	1.59508	-0.830131	0.406465	0.504501	chr1:10420687-10420694_+
1.42151	-3.62491	1.71946	-2.10817	0.0350166	0.0768192	chr1:10422472-10422479_+
1.15252	-0.881991	1.90434	-0.463149	0.643258	0.717219	chr1:10422985-10422992_+
1.64895	-2.66636	1.68152	-1.58568	0.112811	0.186332	chr1:10430252-10430259_+
2.48912	-0.667103	1.12575	-0.592588	0.553457	0.640244	chr1:10435285-10435292_+
0.520596	-2.18069	3.75771	-0.580326	0.561695	NA	chr1:10438839-10438846_+
1.15631	-2.04504	1.94742	-1.05013	0.293659	0.389531	chr1:10440273-10440280_+
1.84372	-3.99283	1.55492	-2.56786	0.0102328	0.0299579	chr1:10440484-10440491_+
13.6644	-2.47047	0.574651	-4.29907	1.71514e-05	0.000258197	chr1:10440613-10440632_+
4.57046	3.05852	0.934968	3.27125	0.00107071	0.00539797	chr1:10441523-10441530_+
3.51861	-1.71375	0.981765	-1.74558	0.080884	0.145323	chr1:10441578-10441588_+
1.08929	-3.25776	2.03768	-1.59875	0.109875	NA	chr1:10460847-10460854_+
1.8015	-0.0359524	1.27356	-0.0282298	0.977479	0.984011	chr1:10461030-10461038_+
2.58325	-1.66431	1.14714	-1.45084	0.146825	0.228755	chr1:10461203-10461211_+
2.02612	0.0528744	1.1835	0.0446765	0.964365	0.97468	chr1:10462013-10462020_+
2.9716	-2.74002	1.2837	-2.13447	0.0328039	0.0732166	chr1:10462811-10462820_+
1.12979	-3.3018	2.00881	-1.64366	0.100246	0.169744	chr1:10463429-10463436_+
6.48704	-1.83088	0.722578	-2.53381	0.0112829	0.0322208	chr1:10463587-10463594_+
0.879969	-2.94122	2.40154	-1.22472	0.22068	NA	chr1:10467380-10467387_+
0.800239	3.53018	2.63513	1.33966	0.180356	NA	chr1:10467663-10467670_+
1.4342	-2.49858	1.69471	-1.47434	0.14039	0.221255	chr1:10467902-10467909_+
0.77042	-2.74627	2.68224	-1.02387	0.305897	NA	chr1:10469934-10469941_+
3.26875	-2.81276	1.21601	-2.3131	0.0207172	0.0514202	chr1:10470438-10470471_+
2.59497	-2.40668	1.28655	-1.87064	0.0613954	0.117477	chr1:10472693-10472701_+
0.973675	-1.82916	2.19047	-0.835058	0.403685	NA	chr1:10473227-10473234_+
0.912333	-1.59391	2.41386	-0.660316	0.509051	NA	chr1:10473727-10473734_+
1.53688	-1.30395	1.58527	-0.822543	0.410768	0.508514	chr1:10473877-10473884_+
1.65696	0.727283	1.3438	0.541214	0.58836	0.671932	chr1:10474052-10474059_+
0.75111	-1.2141	2.63117	-0.461431	0.64449	NA	chr1:10475330-10475337_+
3.06212	-4.7335	1.3697	-3.45587	0.000548514	0.0032695	chr1:10478773-10478807_+
1.42151	-3.62491	1.71946	-2.10817	0.0350166	0.0768192	chr1:10492665-10492672_+
1.25633	-0.86432	1.74997	-0.493907	0.621372	0.699385	chr1:10499311-10499318_+
3.93295	5.81701	1.33725	4.34999	1.36143e-05	0.000217414	chr1:10516698-10516721_-
3.88356	-1.45278	0.899382	-1.61531	0.106244	0.177505	chr1:10517239-10517291_-
1.67134	-3.85881	1.5935	-2.42159	0.015453	0.0409467	chr1:10518797-10518805_+
2.75794	-2.5338	1.25831	-2.01366	0.0440456	0.0911725	chr1:10520036-10520061_-
9.16334	-3.29218	0.831093	-3.96127	7.45519e-05	0.000758216	chr1:10520716-10520738_-
17.2912	-4.31688	0.774795	-5.57165	2.52341e-08	1.72153e-06	chr1:10521078-10521111_-
5.5748	-3.61013	1.13527	-3.17997	0.0014729	0.00682948	chr1:10521230-10521253_-
8.70713	-4.36125	1.09793	-3.97224	7.12008e-05	0.000735362	chr1:10522041-10522064_-
1.40419	-1.1665	1.61213	-0.723576	0.469326	0.564525	chr1:10522573-10522598_-
2.31683	-3.2123	1.46155	-2.19787	0.0279585	0.0645343	chr1:10523770-10523795_-
3.13269	-3.73793	1.35892	-2.75066	0.00594755	0.0196838	chr1:10525201-10525225_-
0.64145	-1.08302	3.2029	-0.338137	0.73526	NA	chr1:10525614-10525637_-
1.40719	-1.44672	1.67575	-0.863325	0.387959	0.485873	chr1:10530096-10530121_-
1.08289	3.94383	2.10258	1.87571	0.0606953	NA	chr1:10531574-10531599_-
2.04397	4.87995	1.53769	3.17356	0.0015058	0.00694184	chr1:10540005-10540012_+
0.942948	-1.78209	2.20494	-0.808225	0.418961	NA	chr1:10540369-10540376_+
0.981124	-3.10334	2.37834	-1.30483	0.19195	NA	chr1:10550664-10550671_+
0.468922	-2.04075	3.97773	-0.513043	0.607921	NA	chr1:10551182-10551189_+
1.57027	-1.51522	1.55176	-0.976455	0.328839	0.425545	chr1:10564233-10564240_+
1.52699	-1.47376	1.54759	-0.952292	0.340949	0.437712	chr1:10564789-10564796_+
0.610584	-2.41787	3.5672	-0.677805	0.497896	NA	chr1:10573628-10573635_+
0.921862	-3.00034	2.32484	-1.29056	0.196857	NA	chr1:10577447-10577454_+
2.55001	-2.39334	1.28898	-1.85678	0.063343	0.120324	chr1:10578478-10578486_+
1.32794	-3.54348	1.92042	-1.84516	0.0650143	0.122655	chr1:10579448-10579455_+
1.68555	-1.79502	1.51791	-1.18256	0.236984	0.331167	chr1:10580155-10580162_+
1.38253	-2.45187	1.74121	-1.40814	0.159089	0.243796	chr1:10600063-10600072_+
1.2312	-2.16674	1.83635	-1.17992	0.238034	0.331934	chr1:10600487-10600494_+
5.97928	3.08638	0.841583	3.66735	0.00024508	0.00180558	chr1:10600623-10600657_+
4.66155	-0.0992887	0.723218	-0.137287	0.890804	0.919187	chr1:10601074-10601082_+
2.57003	-2.34017	1.28288	-1.82416	0.0681275	0.127219	chr1:10601219-10601276_+
0.651091	-2.50262	3.09341	-0.809017	0.418506	NA	chr1:10601577-10601584_+
2.3582	3.99366	1.49167	2.67732	0.00742138	0.0233608	chr1:10602049-10602056_+
1.33152	-3.52428	1.85043	-1.90458	0.0568352	0.111128	chr1:10602732-10602739_+
0.859022	-2.90988	2.64149	-1.10161	0.270633	NA	chr1:10603747-10603754_+
1.26193	-2.20035	1.81536	-1.21207	0.225485	0.319232	chr1:10606384-10606391_+
2.34307	-0.385585	1.08834	-0.354288	0.723123	0.784737	chr1:10606707-10606714_+
1.15809	0.260632	1.7942	0.145264	0.884503	0.914338	chr1:10611781-10611788_+
0.480089	-2.07268	3.97619	-0.521273	0.602177	NA	chr1:10614285-10614292_+
3.47002	-2.94464	1.22986	-2.39428	0.0166529	0.0432899	chr1:10618735-10618743_+
2.27888	-0.36294	1.11205	-0.32637	0.744144	0.802421	chr1:10622014-10622021_+
6.2326	-2.33644	0.802735	-2.9106	0.00360739	0.0134459	chr1:10623908-10623915_+
8.86425	-2.64217	0.713172	-3.70482	0.000211545	0.00162241	chr1:10623922-10623937_+
3.21509	-3.76505	1.35245	-2.78388	0.00537123	0.0182047	chr1:10624656-10624665_+
0.794392	3.52045	2.83999	1.2396	0.215124	NA	chr1:10625557-10625564_+
1.63817	-0.697473	1.34757	-0.517577	0.604753	0.685464	chr1:10625899-10625906_+
1.3494	3.16479	1.86352	1.69829	0.0894529	0.156917	chr1:10629319-10629326_+
0.844705	-0.449111	2.53159	-0.177403	0.859192	NA	chr1:10636835-10636842_+
3.47376	-0.502809	0.866628	-0.58019	0.561787	0.64791	chr1:10636937-10636944_+
1.01046	-3.13983	2.14108	-1.46647	0.14252	NA	chr1:10646940-10646947_+
0.870439	-1.51543	2.49288	-0.607901	0.543253	NA	chr1:10652322-10652329_+
0.7802	-2.76323	2.88222	-0.958717	0.337701	NA	chr1:10660714-10660721_+
0.73155	-1.16889	2.88556	-0.405084	0.685416	NA	chr1:10661083-10661090_+
3.09104	-2.72472	1.24696	-2.18509	0.0288822	0.0659746	chr1:10661258-10661266_+
1.14096	-3.31417	1.96015	-1.69077	0.0908798	0.158488	chr1:10664609-10664618_+
2.82499	-3.56907	1.3818	-2.58292	0.00979682	0.0289595	chr1:10680116-10680123_+
0.270771	-1.22908	4.03044	-0.30495	0.760405	NA	chr1:10688976-10688983_+
0.960177	-3.07553	2.41106	-1.27559	0.202099	NA	chr1:10710337-10710362_-
1.21397	-0.970401	1.88894	-0.513727	0.607443	0.687848	chr1:10790221-10790246_-
1.9548	-2.99261	1.49725	-1.99874	0.0456366	0.0937231	chr1:10853489-10853513_-
1.87144	4.74461	1.58202	2.99908	0.00270795	0.0107967	chr1:11074621-11074628_+
0.849242	-2.89618	2.47269	-1.17127	0.241492	NA	chr1:11074733-11074740_+
0.651091	-2.50262	3.09341	-0.809017	0.418506	NA	chr1:11074860-11074863_+
1.06366	-1.99454	2.01412	-0.990282	0.322036	NA	chr1:11075036-11075039_+
6.5404	-3.23264	0.977207	-3.30804	0.0009395	0.00489686	chr1:11075486-11075500_+
0.934694	-0.693152	2.32961	-0.29754	0.766054	NA	chr1:11075996-11076003_+
1.40373	-1.29573	1.59298	-0.8134	0.415989	0.513141	chr1:11076223-11076226_+
2.2129	-0.636941	1.173	-0.543001	0.587129	0.670795	chr1:11076298-11076305_+
4.70515	-2.74699	1.00363	-2.73706	0.00619906	0.0203338	chr1:11077373-11077383_+
2.60813	-1.68291	1.12657	-1.49384	0.135218	0.21514	chr1:11077842-11077849_+
4.46787	-0.623314	0.791152	-0.787855	0.430781	0.526621	chr1:11078495-11078535_+
1.21339	2.97725	1.91247	1.55675	0.119529	0.195317	chr1:11078658-11078661_+
2.86994	4.32042	1.40979	3.06458	0.00217974	0.00923236	chr1:11078903-11078910_+
3.85946	1.25994	0.829674	1.51859	0.128865	0.207555	chr1:11078913-11078916_+
1.92328	2.17092	1.35151	1.60629	0.10821	0.180212	chr1:11079019-11079026_+
2.96018	5.39562	1.40195	3.84866	0.000118765	0.00106644	chr1:11079190-11079197_+
2.45351	0.492933	1.02648	0.480216	0.631074	0.707592	chr1:11079622-11079629_+
2.05318	-3.07585	1.47424	-2.0864	0.0369427	0.0797536	chr1:11079707-11079717_+
3.41146	0.838899	0.866249	0.968426	0.332831	0.429529	chr1:11080175-11080182_+
11.5292	3.84759	0.695345	5.53335	3.14169e-08	2.05721e-06	chr1:11080279-11080317_+
8.47359	1.90689	0.587694	3.2447	0.00117573	0.00576985	chr1:11080457-11080491_+
3.31955	2.97333	1.09792	2.70815	0.00676588	0.0217553	chr1:11080627-11080634_+
0.812314	-2.81668	2.78007	-1.01317	0.310979	NA	chr1:11080826-11080829_+
2.70952	-1.8804	1.16318	-1.61661	0.105963	0.177087	chr1:11081593-11081596_+
5.46383	3.33674	0.898111	3.71529	0.00020297	0.00157511	chr1:11082053-11082060_+
4.43849	3.38728	1.03041	3.2873	0.00101153	0.00517149	chr1:11082154-11082161_+
8.04547	-0.921718	0.586776	-1.57082	0.116225	0.190881	chr1:11082529-11082557_+
11.8334	3.25187	0.615471	5.28355	1.26702e-07	6.2033e-06	chr1:11082795-11082839_+
3.34503	1.77424	0.939587	1.88832	0.0589835	0.114239	chr1:11082908-11082911_+
11.1609	4.04796	0.759591	5.32913	9.86842e-08	5.08552e-06	chr1:11083217-11083246_+
3.75222	2.69505	0.98247	2.74313	0.00608563	0.0200624	chr1:11083400-11083407_+
11.2931	1.99559	0.505524	3.94756	7.8952e-05	0.000790698	chr1:11083500-11083529_+
9.35985	2.35709	0.593746	3.96987	7.19132e-05	0.000741007	chr1:11083544-11083578_+
18.729	1.71266	0.391084	4.37926	1.19081e-05	0.00019742	chr1:11084094-11084107_+
10.2688	3.63585	0.715931	5.07849	3.80438e-07	1.46362e-05	chr1:11084490-11084550_+
19.5729	3.11352	0.468887	6.64025	3.13157e-11	6.80662e-09	chr1:11084718-11084769_+
12.0593	5.53564	1.08301	5.11133	3.19902e-07	1.27385e-05	chr1:11084785-11084818_+
14.0213	2.78956	0.527552	5.28775	1.23831e-07	6.09182e-06	chr1:11084840-11084873_+
14.4614	5.22334	0.896236	5.82808	5.60685e-09	5.15172e-07	chr1:11085092-11085118_+
11.6173	5.51337	1.08441	5.0842	3.69182e-07	1.42966e-05	chr1:11085140-11085148_+
15.6994	5.95435	1.07011	5.56425	2.63282e-08	1.78303e-06	chr1:11085151-11085169_+
9.56	1.72438	0.5346	3.22554	0.00125733	0.00606713	chr1:11085318-11085351_+
4.81718	3.55698	1.01621	3.50026	0.000464811	0.00289922	chr1:11085361-11085368_+
0.468922	-2.04075	3.97773	-0.513043	0.607921	NA	chr1:11114843-11114868_-
1.78798	-1.76703	1.41974	-1.24462	0.213272	0.305882	chr1:11130546-11130571_-
2.40771	-0.533748	1.09546	-0.487235	0.626092	0.703139	chr1:11132763-11132786_-
3.85841	2.72926	0.979162	2.78735	0.00531417	0.0180531	chr1:11134054-11134079_-
5.15093	-2.9137	0.981736	-2.9679	0.00299838	0.0117142	chr1:11134514-11134548_-
4.59495	3.54193	1.04065	3.40357	0.000665105	0.00377877	chr1:11137009-11137034_-
3.57503	0.435273	0.83949	0.518496	0.604112	0.685082	chr1:11137411-11137436_-
1.26927	1.09451	1.68066	0.651238	0.514893	0.605525	chr1:11137525-11137550_-
2.04518	-1.29633	1.23946	-1.04589	0.295614	0.391386	chr1:11137838-11137861_-
1.97589	-2.04783	1.39532	-1.46764	0.142202	0.223222	chr1:11139490-11139513_-
1.86213	-1.09347	1.30118	-0.840368	0.400702	0.498754	chr1:11139749-11139784_-
1.87819	0.43616	1.24671	0.34985	0.726451	0.787547	chr1:11140107-11140132_-
10.3308	2.85066	0.599174	4.75765	1.95864e-06	5.09641e-05	chr1:11140456-11140538_-
11.8192	1.91856	0.500776	3.83116	0.000127539	0.00112258	chr1:11140599-11140635_-
10.6178	3.46991	0.666836	5.20354	1.95531e-07	8.66938e-06	chr1:11140723-11140760_-
4.3274	3.44078	1.06332	3.23588	0.00121268	0.0059098	chr1:11140815-11140840_-
2.41258	0.347113	1.09584	0.316757	0.751428	0.808392	chr1:11141874-11141897_-
1.54237	-2.62081	1.6344	-1.60353	0.108817	0.180985	chr1:11141931-11141954_-
2.04679	0.690088	1.14767	0.601295	0.547643	0.634757	chr1:11142276-11142299_-
0	NA	NA	NA	NA	NA	chr1:11142937-11142960_-
4.58687	5.04857	1.31226	3.84722	0.000119465	0.00107035	chr1:11147329-11147354_-
2.29846	0.347791	1.08286	0.321179	0.748075	0.805608	chr1:11147629-11147654_-
2.22674	-0.399129	1.1371	-0.351005	0.725585	0.786894	chr1:11149103-11149128_-
1.38125	-2.36012	1.72805	-1.36577	0.172011	0.259222	chr1:11149792-11149815_-
2.04412	-1.92086	1.36238	-1.40993	0.158562	0.243187	chr1:11150110-11150135_-
1.47405	2.23252	1.59253	1.40187	0.160954	0.246062	chr1:11150641-11150666_-
2.68379	-3.47113	1.40175	-2.47628	0.0132759	0.0363861	chr1:11150701-11150734_-
3.12394	-1.57271	1.00983	-1.55741	0.119373	0.195135	chr1:11150857-11150882_-
2.2383	3.94544	1.4801	2.66565	0.00768391	0.0239388	chr1:11151237-11151262_-
3.07472	5.46767	1.391	3.93073	8.46875e-05	0.000828674	chr1:11151638-11151663_-
2.17461	-2.03641	1.33047	-1.53059	0.12587	0.203726	chr1:11152320-11152343_-
1.35247	-3.54313	1.83648	-1.9293	0.0536934	0.106526	chr1:11152640-11152665_-
1.61316	-1.41581	1.52797	-0.9266	0.354134	0.45083	chr1:11153962-11153985_-
1.87736	-2.92014	1.57583	-1.85308	0.0638709	0.121095	chr1:11154390-11154413_-
1.61277	-0.684363	1.40456	-0.487245	0.626085	0.703134	chr1:11154581-11154606_-
2.60135	1.32581	1.03771	1.27764	0.201378	0.292384	chr1:11158128-11158153_-
0.965421	-0.738969	2.14043	-0.345243	0.729912	NA	chr1:11168520-11168545_-
2.39854	-0.883047	1.11903	-0.789119	0.430042	0.525928	chr1:11169426-11169451_-
1.71894	-1.6765	1.47468	-1.13685	0.2556	0.350286	chr1:11171432-11171455_-
1.3674	-0.257541	1.51175	-0.170359	0.864727	0.899025	chr1:11172845-11172870_-
1.55556	0.116862	1.4507	0.0805553	0.935796	0.95359	chr1:11174929-11174954_-
2.35001	5.05813	1.48369	3.40915	0.00065165	0.0037204	chr1:11175095-11175120_-
3.2426	-2.72599	1.21905	-2.23616	0.025341	0.0598304	chr1:11176500-11176534_-
2.98695	-2.01445	1.12944	-1.78357	0.0744929	0.136435	chr1:11178720-11178744_-
0.900916	-2.97106	2.34089	-1.2692	0.20437	NA	chr1:11179622-11179647_-
0.541542	-2.23498	3.96887	-0.563127	0.573348	NA	chr1:11179682-11179707_-
3.61045	-1.72922	0.956656	-1.80757	0.0706742	0.130976	chr1:11180038-11180087_-
1.57087	-0.64165	1.43057	-0.448528	0.653772	0.726245	chr1:11180277-11180302_-
1.15074	-3.32417	1.95928	-1.69663	0.0897666	0.157165	chr1:11180679-11180704_-
2.32487	0.754789	1.10888	0.680677	0.496076	0.589493	chr1:11181936-11181961_-
2.00055	-1.32977	1.34497	-0.988694	0.322813	0.419313	chr1:11183572-11183597_-
2.15088	0.0262504	1.14579	0.0229102	0.981722	0.987032	chr1:11184287-11184312_-
1.06602	0.805449	1.91461	0.420685	0.673985	NA	chr1:11187871-11187896_-
1.23109	-2.26588	1.86865	-1.21258	0.225292	0.319105	chr1:11189245-11189270_-
1.52849	-1.29603	1.61569	-0.802152	0.422465	0.519386	chr1:11191109-11191134_-
3.6635	1.1374	0.842554	1.34995	0.177033	0.26461	chr1:11191254-11191279_-
4.00335	3.25022	1.04685	3.10476	0.00190436	0.00832257	chr1:11195334-11195359_-
1.51795	-2.5524	1.69252	-1.50805	0.131543	0.21098	chr1:11195640-11195665_-
3.34992	-0.536475	0.885322	-0.605966	0.544537	0.631954	chr1:11195882-11195907_-
1.47471	-2.5327	1.67354	-1.51338	0.130182	0.209172	chr1:11196711-11196736_-
1.67843	-1.64408	1.45997	-1.1261	0.260122	0.355175	chr1:11196825-11196850_-
6.6188	-3.30036	0.948487	-3.4796	0.000502157	0.0030638	chr1:11196946-11196962_-
1.36319	0.728099	1.51816	0.479593	0.631517	0.707949	chr1:11197613-11197638_-
1.86423	-0.271592	1.24456	-0.218223	0.827256	0.870136	chr1:11204947-11204972_-
2.14342	-2.09225	1.33694	-1.56496	0.117592	0.192746	chr1:11205683-11205716_-
1.98777	-1.13951	1.23088	-0.925769	0.354566	0.451194	chr1:11209323-11209356_-
5.28753	-1.11616	0.748647	-1.49091	0.135986	0.21606	chr1:11210270-11210306_-
1.23513	-2.17715	1.83415	-1.18701	0.235225	0.329229	chr1:11213866-11213891_-
2.92847	-2.67898	1.26591	-2.11625	0.034324	0.0759316	chr1:11217194-11217227_-
3.67019	-1.39742	0.924616	-1.51136	0.130698	0.209867	chr1:11230788-11230822_-
0.630144	-2.45941	3.17633	-0.774294	0.438757	NA	chr1:11231476-11231501_-
1.59871	-3.80864	1.65712	-2.29835	0.0215419	0.0531125	chr1:11233109-11233143_-
0.933634	-1.68386	2.23993	-0.751744	0.452205	NA	chr1:11233528-11233553_-
0.683344	-1.1923	2.82295	-0.42236	0.672762	NA	chr1:11235299-11235324_-
0.818515	-2.84887	2.57513	-1.1063	0.268595	NA	chr1:11236392-11236417_-
1.70965	-3.90944	1.57325	-2.48494	0.0129573	0.0357171	chr1:11237381-11237406_-
1.10747	1.0767	1.92176	0.560267	0.575297	NA	chr1:11237895-11237920_-
4.67131	-2.72293	0.996487	-2.73253	0.00628509	0.0205463	chr1:11240887-11240910_-
1.42151	-3.62491	1.71946	-2.10817	0.0350166	0.0768192	chr1:11252547-11252572_-
0.8334	-1.55503	2.43045	-0.639812	0.522295	NA	chr1:11253104-11253129_-
1.05435	-1.90988	2.16006	-0.884179	0.3766	NA	chr1:11255063-11255088_-
3.2602	0.440647	0.875943	0.503055	0.614926	0.69394	chr1:11256177-11256202_-
5.14512	-2.03191	0.829092	-2.45076	0.0142553	0.038516	chr1:11256890-11256923_-
0.77042	-2.74627	2.68224	-1.02387	0.305897	NA	chr1:11262156-11262181_-
2.0321	-4.14479	1.48425	-2.79251	0.00523002	0.0178424	chr1:11262241-11262283_-
0.970208	-1.73399	2.16146	-0.802229	0.42242	NA	chr1:11267413-11267438_-
1.58611	-2.61545	1.64284	-1.59203	0.111378	0.184437	chr1:11267699-11267724_-
1.05388	-1.98216	2.0513	-0.966291	0.333899	NA	chr1:11269832-11269857_-
1.89625	-1.74218	1.4298	-1.21848	0.223042	0.316745	chr1:11271540-11271565_-
6.17709	5.47094	1.2779	4.2812	1.8589e-05	0.000274966	chr1:11273187-11273221_-
2.55703	-0.224	1.01305	-0.221116	0.825002	0.868306	chr1:11280694-11280727_-
3.67696	-3.97235	1.35007	-2.94234	0.00325747	0.0124506	chr1:11281088-11281153_-
1.39395	-1.28649	1.61931	-0.794468	0.426923	0.523266	chr1:11281277-11281302_-
1.36996	4.31893	1.80543	2.3922	0.0167479	0.0434413	chr1:11284316-11284341_-
3.06018	-3.67395	1.36592	-2.68972	0.00715123	0.0227191	chr1:11285515-11285551_-
3.67814	-1.45127	0.944045	-1.53729	0.124223	0.201624	chr1:11287089-11287114_-
2.24723	-2.07836	1.31666	-1.57851	0.114449	0.188445	chr1:11294426-11294451_-
3.15167	-1.48712	1.00232	-1.48367	0.137896	0.218364	chr1:11298243-11298277_-
0.589637	-2.37077	3.67583	-0.644962	0.518952	NA	chr1:11303519-11303544_-
1.41198	-2.38922	1.72539	-1.38474	0.166132	0.252529	chr1:11309300-11309325_-
1.15252	-0.881991	1.90434	-0.463149	0.643258	0.717219	chr1:11310758-11310783_-
3.25455	-1.57254	0.996998	-1.57728	0.114732	0.188823	chr1:11312415-11312484_-
2.82407	-3.5482	1.38925	-2.55404	0.010648	0.0307827	chr1:11313507-11313549_-
3.41931	-1.61015	0.989921	-1.62654	0.103834	0.174323	chr1:11317190-11317228_-
0.56869	-2.32172	3.81723	-0.608221	0.543041	NA	chr1:11335635-11335642_+
[truncated: 304,870+ more rows]

## Sheet: Supplemental_Table_6
Supplemental Table 6. Fold Change in U2AF2 crosslinking relative to 3' splice sites
	logFC	logCPM	PValue	FDR	u2af_ctl1	u2af_ctl2	u2af_ctl3	u2af_oe1	u2af_oe2	u2af_oe3	u2af_ctl1	u2af_ctl2	u2af_ctl3	u2af_oe1	u2af_oe2	u2af_oe3
chr8:144676688:144676888:chr8:144676063-144679845;refseq_id=NM_001130055,NM_001960,NM_001195203,NM_001130056,NM_001130053,NM_032378;ensg_id=ENSG00000104529;gsymbol=EEF1D;-:200:-	7.44771	-0.292176	5.40673e-11	5.88541e-10	0	0	0	11	6	15	0	0	0	436.162	200.454	484.966
chr7:99702296:99702496:chr7:99701715-99702721;refseq_id=NM_004722;ensg_id=ENSG00000221838;gsymbol=AP4M1;+:200:+	7.4442	-0.292292	9.9428e-12	1.22688e-10	0	0	0	11	7	14	0	0	0	436.162	233.863	452.635
chr2:190590405:190590605:chr2:190585345-190592823;refseq_id=NM_144708;ensg_id=ENSG00000151687;gsymbol=ANKAR;+:200:+	7.10974	-0.561266	1.21413e-08	8.78954e-08	0	0	0	13	8	4	0	0	0	515.464	267.272	129.324
chr1:153725976:153726176:chr1:153724755-153727215;refseq_id=NM_023015;ensg_id=ENSG00000143624;gsymbol=INTS3;+:200:+	6.97291	-0.6484	1.70039e-08	1.19587e-07	0	0	0	8	4	11	0	0	0	317.209	133.636	355.642
chr17:61904874:61905033:chr17:61904770-61905569;refseq_id=NM_002805;ensg_id=ENSG00000087191;gsymbol=PSMC5;+:159:+	6.82626	-0.741185	6.48368e-08	3.97867e-07	0	0	0	3	8	10	0	0	0	118.953	267.272	323.311
chr17:36462299:36462499:chr17:36455317-36474634;refseq_id=NM_032351;ensg_id=ENSG00000174100;gsymbol=MRPL45;+:200:+	6.51581	0.87125	9.82467e-31	6.21865e-29	0	1	1	25	26	26	0	15.1717	11.6482	991.277	868.636	840.608
chr17:55075534:55075734:chr17:55074323-55078353;refseq_id=NM_021626;ensg_id=ENSG00000121064;gsymbol=SCPEP1;+:200:+	6.16507	0.533167	2.42108e-20	7.07286e-19	0	2	0	22	14	24	0	30.3435	0	872.324	467.727	775.946
chr17:55075545:55075745:chr17:55074323-55078353;refseq_id=NM_021626;ensg_id=ENSG00000121064;gsymbol=SCPEP1;+:200:+	6.16507	0.533167	2.40501e-20	7.07286e-19	0	2	0	22	14	24	0	30.3435	0	872.324	467.727	775.946
chr2:230765574:230765774:chr2:230744698-230786655;refseq_id=NM_004238;ensg_id=ENSG00000153827;gsymbol=TRIP12;-:200:-	6.10757	-0.15816	2.05359e-12	2.83031e-11	0	1	0	14	7	14	0	15.1717	0	555.115	233.863	452.635
chr8:146054611:146054811:chr8:146054428-146062892;refseq_id=NM_003416;ensg_id=ENSG00000147789;gsymbol=ZNF7;+:200:+	6.03218	0.418229	7.19711e-22	2.38832e-20	1	1	0	18	16	21	16.4913	15.1717	0	713.719	534.545	678.952
chr8:146054662:146054862:chr8:146054428-146062892;refseq_id=NM_003416;ensg_id=ENSG00000147789;gsymbol=ZNF7;+:200:+	5.97968	0.370797	1.25151e-20	3.78553e-19	1	1	0	18	15	20	16.4913	15.1717	0	713.719	501.136	646.621
chr8:146054629:146054829:chr8:146054428-146062892;refseq_id=NM_003416;ensg_id=ENSG00000147789;gsymbol=ZNF7;+:200:+	5.97967	0.370797	1.20138e-20	3.66634e-19	1	1	0	18	15	20	16.4913	15.1717	0	713.719	501.136	646.621
chr12:66275322:66275522:chr12:66232299-66345195;refseq_id=NM_003483;ensg_id=ENSG00000149948;gsymbol=HMGA2;+:200:+	5.85493	1.05559	3.27142e-25	1.39771e-23	1	1	2	27	18	41	16.4913	15.1717	23.2964	1070.58	601.363	1325.57
chr7:56141606:56141806:chr7:56140690-56145879;refseq_id=NM_015411,NM_001146333,NM_001130069,NM_001042469,NM_001042470;ensg_id=ENSG00000129103;gsymbol=SUMF2;+:200:+	5.82569	-0.371582	7.50232e-12	9.35873e-11	0	0	1	8	12	9	0	0	11.6482	317.209	400.909	290.98
chr16:1887871:1888071:chr16:1883984-1889439;refseq_id=NM_001163560,NM_152764;ensg_id=ENSG00000162039;gsymbol=MEIOB;-:200:-	5.77817	0.190869	9.56128e-18	2.38543e-16	0	1	1	15	12	19	0	15.1717	11.6482	594.766	400.909	614.29
chr15:32907805:32908005:chr15:32907345-32912379;refseq_id=NA;ensg_id=ENSG00000198826;gsymbol=ARHGAP11A;+:200:+	5.71665	0.934407	9.96226e-29	5.40492e-27	2	1	1	19	26	34	32.9826	15.1717	11.6482	753.37	868.636	1099.26
chr7:21468094:21468294:chr7:21467689-21516925;refseq_id=NM_003112;ensg_id=ENSG00000105866;gsymbol=SP4;+:200:+	5.68186	0.547742	1.89814e-24	7.54402e-23	1	0	2	20	21	19	16.4913	0	23.2964	793.021	701.59	614.29
chr1:85724744:85724944:chr1:85724207-85725355;refseq_id=NR_024113,NM_198077;ensg_id=ENSG00000162642;gsymbol=C1orf52;-:200:-	5.67716	0.110509	3.53185e-16	7.83888e-15	2	0	0	13	11	19	32.9826	0	0	515.464	367.5	614.29
chr5:138941628:138941828:chr5:138940751-138980020;refseq_id=NM_181838,NM_003339;ensg_id=ENSG00000131508;gsymbol=UBE2D2;+:200:+	5.67405	-0.483986	3.28108e-10	3.1152e-09	0	1	0	10	6	10	0	15.1717	0	396.511	200.454	323.311
chr6:43173973:43174058:chr6:43173745-43181032;refseq_id=NM_015089;ensg_id=ENSG00000112659;gsymbol=CUL9;+:85:+	5.65927	-0.484642	7.34427e-08	4.45084e-07	1	0	0	6	3	17	16.4913	0	0	237.906	100.227	549.628
chr17:26999574:26999774:chr17:26989302-27000528;refseq_id=NM_003170;ensg_id=ENSG00000109111;gsymbol=SUPT6H;+:200:+	5.56463	0.751453	9.49853e-19	2.49738e-17	0	1	3	26	11	32	0	15.1717	34.9447	1030.93	367.5	1034.59
chr15:74969363:74969563:chr15:74967302-74988386;refseq_id=NA;ensg_id=ENSG00000179151;gsymbol=EDC3;-:200:-	5.49753	-0.607996	1.67633e-08	1.18382e-07	1	0	0	8	4	11	16.4913	0	0	317.209	133.636	355.642
chr7:150725697:150725866:chr7:150725510-150731004;refseq_id=NM_007188;ensg_id=ENSG00000197150;gsymbol=ABCB8;+:169:+	5.43006	-0.652576	1.89831e-09	1.55844e-08	0	1	0	7	7	8	0	15.1717	0	277.557	233.863	258.649
chr7:150725697:150725887:chr7:150725510-150728378;refseq_id=NM_007188;ensg_id=ENSG00000197150;gsymbol=ABCB8;+:190:+	5.43006	-0.652576	1.89831e-09	1.55844e-08	0	1	0	7	7	8	0	15.1717	0	277.557	233.863	258.649
chr7:91874909:91875109:chr7:91874216-91875414;refseq_id=NM_194456,NM_004912,NM_194454,NM_001013406,NM_194455;ensg_id=ENSG00000001631;gsymbol=KRIT1;-:200:-	5.40914	2.04901	3.51309e-54	2.00129e-51	2	5	4	51	48	62	32.9826	75.8587	46.5929	2022.2	1603.63	2004.53
chr7:91874909:91875103:chr7:91874216-91875228;refseq_id=NM_194456,NM_004912,NM_194454,NM_001013406,NM_194455;ensg_id=ENSG00000001631;gsymbol=KRIT1;-:194:-	5.40914	2.04901	3.37359e-54	2.00129e-51	2	5	4	51	48	62	32.9826	75.8587	46.5929	2022.2	1603.63	2004.53
chr7:128317417:128317617:chr7:128315729-128320203;refseq_id=NM_001128926,NM_001012454;ensg_id=ENSG00000205085;gsymbol=FAM71F2;+:200:+	5.37943	-0.695335	1.37787e-07	8.03677e-07	1	0	0	10	3	8	16.4913	0	0	396.511	100.227	258.649
chr17:60584541:60584741:chr17:60558482-60585914;refseq_id=NM_001112707,NM_006852;ensg_id=ENSG00000146872;gsymbol=TLK2;+:200:+	5.33636	0.239224	2.5919e-18	6.66098e-17	0	1	2	18	16	13	0	15.1717	23.2964	713.719	534.545	420.304
chr22:31926377:31926577:chr22:31924676-31927115;refseq_id=NM_001258326,NM_001258327,NM_001007467,NM_014775,NM_001258325;ensg_id=ENSG00000198089;gsymbol=SFI1;+:200:+	5.32746	-0.740686	1.48444e-06	7.11616e-06	1	0	0	11	1	8	16.4913	0	0	436.162	33.4091	258.649
chr6:31707839:31707970:chr6:31707725-31708390;refseq_id=NA;ensg_id=ENSG00000204410;gsymbol=MSH5;+:131:+	5.31647	0.825483	2.38504e-23	8.9583e-22	1	2	2	27	16	29	16.4913	30.3435	23.2964	1070.58	534.545	937.601
chr16:30015688:30015888:chr16:30012735-30017112;refseq_id=NM_173618;ensg_id=ENSG00000169592;gsymbol=INO80E;+:200:+	5.29422	-0.744951	1.81017e-08	1.255e-07	0	0	1	6	6	8	0	0	11.6482	237.906	200.454	258.649
chr12:107360958:107361060:chr12:107360889-107367813;refseq_id=NM_152261;ensg_id=ENSG00000151135;gsymbol=C12orf23;+:102:+	5.29326	-0.745757	3.54498e-08	2.30356e-07	0	0	1	4	7	9	0	0	11.6482	158.604	233.863	290.98
chr7:91874888:91875088:chr7:91874216-91875228;refseq_id=NM_194456,NM_004912,NM_194454,NM_001013406,NM_194455;ensg_id=ENSG00000001631;gsymbol=KRIT1;-:200:-	5.28889	1.9206	1.05039e-49	3.59024e-47	2	5	4	48	43	57	32.9826	75.8587	46.5929	1903.25	1436.59	1842.87
chr1:247682276:247682476:chr1:247681734-247690356;refseq_id=NA;ensg_id=ENSG00000169224;gsymbol=GCSAML;+:200:+	5.27799	0.520872	3.19169e-23	1.18578e-21	1	0	3	18	17	23	16.4913	0	34.9447	713.719	567.954	743.615
chr11:117042137:117042337:chr11:117034486-117047131;refseq_id=NM_001184746,NM_001184747,NM_001184748;ensg_id=ENSG00000168092;gsymbol=PAFAH1B2;+:200:+	5.22233	-0.792554	9.74823e-08	5.79468e-07	0	0	1	6	9	4	0	0	11.6482	237.906	300.682	129.324
chr2:85583889:85584089:chr2:85582678-85589383;refseq_id=NM_001135022,NM_001135023,NM_001135021,NM_032213;ensg_id=ENSG00000115459;gsymbol=ELMOD3;+:200:+	5.18039	1.14569	2.39808e-28	1.24191e-26	2	3	2	38	23	28	32.9826	45.5152	23.2964	1506.74	768.408	905.27
chr16:2012657:2012736:chr16:2012062-2012910;refseq_id=NM_002952;ensg_id=ENSG00000140988;gsymbol=RPS2;-:79:-	5.16392	-0.302157	1.15473e-08	8.37973e-08	0	1	1	6	4	20	0	15.1717	11.6482	237.906	133.636	646.621
chr10:75933973:75934173:chr10:75910943-75960596;refseq_id=NA;ensg_id=NA;gsymbol=NA;+:200:+	5.16239	-0.298552	1.13026e-11	1.37481e-10	2	0	0	12	11	7	32.9826	0	0	475.813	367.5	226.317
chr14:71436375:71436575:chr14:71435738-71445365;refseq_id=NM_014982;ensg_id=ENSG00000100731;gsymbol=PCNX;+:200:+	5.14879	0.669654	6.35195e-21	2.01027e-19	1	2	2	25	14	25	16.4913	30.3435	23.2964	991.277	467.727	808.277
chr19:40840811:40841011:chr19:40839758-40842131;refseq_id=NM_001256440,NR_046202;ensg_id=ENSG00000160392;gsymbol=C19orf47;-:200:-	5.14388	-0.838689	2.90741e-07	1.57739e-06	1	0	0	7	7	4	16.4913	0	0	277.557	233.863	129.324
chr10:21829991:21830191:chr10:21827762-21875277;refseq_id=NM_004641,NM_001195626;ensg_id=ENSG00000078403;gsymbol=MLLT10;+:200:+	5.13342	0.36167	1.73616e-15	3.57481e-14	0	1	3	22	9	20	0	15.1717	34.9447	872.324	300.682	646.621
chr15:52575081:52575281:chr15:52571706-52587995;refseq_id=NM_018728;ensg_id=ENSG00000128833;gsymbol=MYO5C;-:200:-	5.11324	-0.336748	5.23055e-12	6.72105e-11	1	0	1	10	8	11	16.4913	0	11.6482	396.511	267.272	355.642
chr17:45608582:45608782:chr17:45600323-45623359;refseq_id=NA;ensg_id=ENSG00000141279;gsymbol=NPEPPS;+:200:+	5.09665	1.24346	1.26223e-31	8.45939e-30	1	2	5	35	24	36	16.4913	30.3435	58.2411	1387.79	801.817	1163.92
chr22:42969439:42969639:chr22:42968442-42970388;refseq_id=NM_014509;ensg_id=ENSG00000183569;gsymbol=SERHL2;+:200:+	5.07087	0.017278	1.41844e-14	2.53834e-13	0	1	2	12	9	18	0	15.1717	23.2964	475.813	300.682	581.959
chr6:31608305:31608421:chr6:31607976-31608481;refseq_id=NM_080702,NM_001199698,NM_001199697,NM_001098534,NM_080703,NM_004639;ensg_id=ENSG00000204463;gsymbol=BAG6;-:116:-	5.06389	-0.371626	1.50532e-11	1.79274e-10	1	1	0	11	8	9	16.4913	15.1717	0	436.162	267.272	290.98
chr22:24383081:24383281:chr22:24381700-24384284;refseq_id=NM_000853;ensg_id=ENSG00000184674;gsymbol=GSTT1;-:200:-	5.05194	2.13392	3.45611e-39	5.36953e-37	5	3	7	62	39	66	82.4565	45.5152	81.5376	2458.37	1302.95	2133.85
chr17:45608555:45608755:chr17:45600323-45623359;refseq_id=NA;ensg_id=ENSG00000141279;gsymbol=NPEPPS;+:200:+	5.02789	1.33979	8.60357e-33	6.39283e-31	1	2	6	36	25	40	16.4913	30.3435	69.8893	1427.44	835.227	1293.24
chr7:75914372:75914572:chr7:75912282-75916605;refseq_id=NM_001110199;ensg_id=ENSG00000177679;gsymbol=SRRM3;+:200:+	5.01672	1.18518	5.31315e-35	5.50314e-33	4	2	2	29	28	34	65.9652	30.3435	23.2964	1149.88	935.454	1099.26
chr11:62653708:62653908:chr11:62652937-62655690;refseq_id=NM_002394,NM_001012662,NM_001012664,NM_001013251;ensg_id=ENSG00000168003;gsymbol=SLC3A2;+:200:+	5.01104	1.48402	3.32764e-31	2.18728e-29	2	3	5	32	25	54	32.9826	45.5152	58.2411	1268.83	835.227	1745.88
chr1:47778693:47778893:chr1:47775948-47779819;refseq_id=NM_003035,NM_001048166;ensg_id=ENSG00000123473;gsymbol=STIL;-:200:-	5.0064	1.3312	1.21154e-32	8.81072e-31	3	3	3	41	29	30	49.4739	45.5152	34.9447	1625.69	968.863	969.932
chr2:74691849:74692049:chr2:74690317-74692537;refseq_id=NM_001146158,NM_006302;ensg_id=ENSG00000115275;gsymbol=MOGS;-:200:-	4.99642	-0.412394	5.60668e-10	5.03783e-09	0	2	0	4	11	12	0	30.3435	0	158.604	367.5	387.973
chr2:74691849:74692022:chr2:74690317-74692537;refseq_id=NM_001146158,NM_006302;ensg_id=ENSG00000115275;gsymbol=MOGS;-:173:-	4.9964	-0.412394	5.63165e-10	5.039e-09	0	2	0	4	11	12	0	30.3435	0	158.604	367.5	387.973
chr20:33868632:33868832:chr20:33867745-33872064;refseq_id=NM_001267067,NM_002212,NR_052022,NM_181466,NM_001267062,NM_181468,NR_049790;ensg_id=ENSG00000242372;gsymbol=EIF6;-:200:-	4.97386	0.259227	2.36082e-19	6.45544e-18	2	0	2	11	20	16	32.9826	0	23.2964	436.162	668.181	517.297
chr2:28974703:28974903:chr2:28974542-28999848;refseq_id=NM_206876;ensg_id=ENSG00000213639;gsymbol=PPP1CB;+:200:+	4.94192	0.234477	3.86997e-16	8.49731e-15	2	0	2	11	12	23	32.9826	0	23.2964	436.162	400.909	743.615
chr19:19639972:19640172:chr19:19639670-19643549;refseq_id=NA;ensg_id=ENSG00000250067,ENSG00000258674,ENSG00000186010;gsymbol=YJEFN3,NDUFA13;+:200:+	4.90752	-0.104793	8.37161e-15	1.58089e-13	1	0	2	12	14	9	16.4913	0	23.2964	475.813	467.727	290.98
chr1:144604209:144604409:chr1:144598512-144606510;refseq_id=NA;ensg_id=ENSG00000225241;gsymbol=NBPF8;+:200:+	4.90434	0.209042	1.71116e-15	3.54469e-14	1	2	1	10	12	23	16.4913	30.3435	11.6482	396.511	400.909	743.615
chrX:48844291:48844491:chrX:48841681-48844610;refseq_id=NM_020137,NM_207672;ensg_id=ENSG00000068400;gsymbol=GRIPAP1;-:200:-	4.90001	-0.49026	1.19297e-10	1.24316e-09	0	1	1	7	8	10	0	15.1717	11.6482	277.557	267.272	323.311
chr1:155145368:155145568:chr1:155145041-155145737;refseq_id=NM_173852;ensg_id=ENSG00000163463;gsymbol=KRTCAP2;-:200:-	4.89965	-0.489978	1.8729e-09	1.54627e-08	1	0	1	6	6	13	16.4913	0	11.6482	237.906	200.454	420.304
chr17:2340134:2340334:chr17:2324025-2341492;refseq_id=NM_024086;ensg_id=ENSG00000127804;gsymbol=METTL16;-:200:-	4.89862	-0.48869	2.18306e-10	2.15656e-09	1	1	0	6	8	11	16.4913	15.1717	0	237.906	267.272	355.642
chr11:118901445:118901558:chr11:118899932-118901616;refseq_id=NM_001164277,NM_001467,NM_001164278,NM_001164279;ensg_id=ENSG00000137700;gsymbol=SLC37A4;-:113:-	4.8976	0.448799	5.80272e-20	1.65281e-18	1	0	4	17	14	23	16.4913	0	46.5929	674.068	467.727	743.615
chr1:151297393:151297593:chr1:151288049-151300191;refseq_id=NM_001198774,NM_001198775;ensg_id=ENSG00000143393;gsymbol=PI4KB;-:200:-	4.88569	1.04466	6.67227e-21	2.09228e-19	4	1	3	32	14	36	65.9652	15.1717	34.9447	1268.83	467.727	1163.92
chr8:22451045:22451245:chr8:22449064-22458870;refseq_id=NA;ensg_id=ENSG00000248235;gsymbol=AC037459.4;+:200:+	4.86608	0.854352	3.71914e-26	1.69493e-24	3	1	3	26	19	27	49.4739	15.1717	34.9447	1030.93	634.772	872.939
chr11:903753:903953:chr11:902962-904859;refseq_id=NM_023947,NM_001142675,NM_001142676,NM_001142674,NM_001142677;ensg_id=ENSG00000177830;gsymbol=CHID1;-:200:-	4.86334	-0.138856	3.26673e-12	4.34463e-11	0	1	2	6	11	17	0	15.1717	23.2964	237.906	367.5	549.628
chr7:100465282:100465482:chr7:100464950-100465855;refseq_id=NM_003302;ensg_id=ENSG00000087077;gsymbol=TRIP6;+:200:+	4.8577	1.33822	3.12112e-34	2.80737e-32	2	4	4	34	26	40	32.9826	60.687	46.5929	1348.14	868.636	1293.24
chr1:11075380:11075580:chr1:11073773-11077064;refseq_id=NM_007375;ensg_id=ENSG00000120948;gsymbol=TARDBP;+:200:+	4.84951	0.644595	8.1705e-15	1.55149e-13	3	1	2	18	9	35	49.4739	15.1717	23.2964	713.719	300.682	1131.59
chr7:99699668:99699868:chr7:99699503-99700404;refseq_id=NM_004722;ensg_id=ENSG00000221838;gsymbol=AP4M1;+:200:+	4.84804	1.93712	1.08313e-52	4.62767e-50	5	4	6	46	45	56	82.4565	60.687	69.8893	1823.95	1503.41	1810.54
chr17:61904988:61905188:chr17:61904770-61905569;refseq_id=NM_002805;ensg_id=ENSG00000087191;gsymbol=PSMC5;+:200:+	4.84048	-0.530963	8.39117e-10	7.26102e-09	1	0	1	5	9	10	16.4913	0	11.6482	198.255	300.682	323.311
chr19:40740478:40740678:chr19:40736224-40741054;refseq_id=NM_001243028,NM_001626,NM_001243027;ensg_id=ENSG00000105221;gsymbol=AKT2;-:200:-	4.81867	0.809276	2.68968e-28	1.37214e-26	1	0	6	18	25	27	16.4913	0	69.8893	713.719	835.227	872.939
chr9:369021:369221:chr9:368018-370300;refseq_id=NM_203447,NM_001193536,NM_001190458;ensg_id=ENSG00000107099;gsymbol=DOCK8;+:200:+	4.81761	0.814719	2.16483e-22	7.47412e-21	3	1	3	18	17	35	49.4739	15.1717	34.9447	713.719	567.954	1131.59
chr1:151734501:151734580:chr1:151733927-151734631;refseq_id=NM_031420;ensg_id=ENSG00000143436;gsymbol=MRPL9;-:79:-	4.79438	-0.199277	1.11034e-11	1.3554e-10	1	1	1	15	10	7	16.4913	15.1717	11.6482	594.766	334.091	226.317
chr17:15927602:15927802:chr17:15909788-15928485;refseq_id=NM_017775,NM_001271420;ensg_id=ENSG00000011295;gsymbol=TTC19;+:200:+	4.79015	3.22213	7.07652e-49	2.01563e-46	11	11	13	124	82	113	181.404	166.889	151.427	4916.73	2739.54	3653.41
chr20:54963562:54963762:chr20:54963212-54965721;refseq_id=NM_198434,NM_198436,NM_198435,NM_198437,NM_198433,NM_003600;ensg_id=ENSG00000087586;gsymbol=AURKA;-:200:-	4.78404	-0.572805	1.96515e-09	1.60308e-08	0	0	2	8	6	9	0	0	23.2964	317.209	200.454	290.98
chr16:4882222:4882422:chr16:4873822-4882913;refseq_id=NM_032569;ensg_id=ENSG00000140632;gsymbol=GLYR1;-:200:-	4.735	0.562538	2.04281e-14	3.59913e-13	2	4	0	17	9	32	32.9826	60.687	0	674.068	300.682	1034.59
chr17:17876965:17877165:chr17:17876127-17881072;refseq_id=NM_001130091,NM_001130092,NM_001130090,NM_031294;ensg_id=ENSG00000171962;gsymbol=LRRC48;+:200:+	4.72483	-0.613762	1.3514e-08	9.7244e-08	0	1	1	7	4	11	0	15.1717	11.6482	277.557	133.636	355.642
chr3:33852388:33852588:chr3:33840066-33853618;refseq_id=NM_001256192,NM_013374,NM_001162429;ensg_id=ENSG00000170248;gsymbol=PDCD6IP;+:200:+	4.72183	-0.236659	7.07718e-10	6.20251e-09	0	2	1	5	7	19	0	30.3435	11.6482	198.255	233.863	614.29
chr19:30196301:30196501:chr19:30189793-30199330;refseq_id=NA;ensg_id=NA;gsymbol=NA;-:200:-	4.71479	0.716791	7.31986e-26	3.2076e-24	2	0	5	20	19	26	32.9826	0	58.2411	793.021	634.772	840.608
chr2:170393850:170394050:chr2:170387862-170396689;refseq_id=NM_024622;ensg_id=ENSG00000138399;gsymbol=FASTKD1;-:200:-	4.70301	0.888992	6.10086e-27	2.97896e-25	4	2	2	27	20	26	65.9652	30.3435	23.2964	1070.58	668.181	840.608
chr16:89829201:89829401:chr16:89828357-89831474;refseq_id=NM_000135;ensg_id=ENSG00000187741;gsymbol=FANCA;-:200:-	4.70144	0.0432327	7.31426e-14	1.19048e-12	0	3	1	9	10	20	0	45.5152	11.6482	356.86	334.091	646.621
chr10:120879652:120879852:chr10:120877031-120883081;refseq_id=NM_207009;ensg_id=ENSG00000119979;gsymbol=FAM45A;+:200:+	4.69579	0.0160214	1.49267e-12	2.09957e-11	1	1	2	16	6	16	16.4913	15.1717	23.2964	634.417	200.454	517.297
chr20:33868625:33868825:chr20:33867745-33872064;refseq_id=NM_001267067,NM_002212,NR_052022,NM_181466,NM_001267062,NM_181468,NR_049790;ensg_id=ENSG00000242372;gsymbol=EIF6;-:200:-	4.68804	0.281146	1.18365e-19	3.2892e-18	2	1	2	11	20	16	32.9826	15.1717	23.2964	436.162	668.181	517.297
chr17:8113567:8113767:chr17:8111056-8113883;refseq_id=NM_004217,NM_001256834;ensg_id=ENSG00000178999;gsymbol=AURKB;-:200:-	4.68399	2.04295	2.63363e-42	4.73776e-40	3	7	8	45	42	69	49.4739	106.202	93.1858	1784.3	1403.18	2230.84
chr6:90331440:90331640:chr6:90327673-90333263;refseq_id=NM_001242809,NM_014942,NM_001242813,NM_001242811,NM_001242814;ensg_id=ENSG00000135299;gsymbol=ANKRD6;+:200:+	4.67661	0.869096	1.62554e-26	7.50823e-25	5	1	2	21	20	31	82.4565	15.1717	23.2964	832.672	668.181	1002.26
chr8:97256308:97256508:chr8:97251645-97258159;refseq_id=NM_015942;ensg_id=ENSG00000156469;gsymbol=MTERFD1;-:200:-	4.66291	-0.657135	6.50774e-08	3.98628e-07	0	1	1	7	3	11	0	15.1717	11.6482	277.557	100.227	355.642
chr12:31237702:31237902:chr12:31236747-31240917;refseq_id=NM_030653,NM_001257145,NM_004399,NM_152438,NM_001257144;ensg_id=ENSG00000013573;gsymbol=DDX11;+:200:+	4.65215	-0.30576	3.3698e-10	3.1852e-09	1	0	2	9	5	15	16.4913	0	23.2964	356.86	167.045	484.966
chr7:100465332:100465532:chr7:100464950-100465855;refseq_id=NM_003302;ensg_id=ENSG00000087077;gsymbol=TRIP6;+:200:+	4.65066	1.27727	2.08385e-33	1.61878e-31	2	5	4	31	25	39	32.9826	75.8587	46.5929	1229.18	835.227	1260.91
chr14:74762682:74762882:chr14:74761851-74763152;refseq_id=NM_005050,NR_003256;ensg_id=ENSG00000119688;gsymbol=ABCD4;-:200:-	4.64601	-0.305682	1.28326e-11	1.54989e-10	0	1	2	11	7	11	0	15.1717	23.2964	436.162	233.863	355.642
chr10:81940892:81941092:chr10:81935863-81965328;refseq_id=NM_145869,NM_001157,NM_145868;ensg_id=ENSG00000122359;gsymbol=ANXA11;-:200:-	4.62792	-0.0144677	1.50521e-15	3.15633e-14	1	3	0	8	13	16	16.4913	45.5152	0	317.209	434.318	517.297
chr12:57033976:57034176:chr12:57032890-57036364;refseq_id=NM_001686;ensg_id=ENSG00000110955;gsymbol=ATP5B;-:200:-	4.62006	1.61723	3.11975e-29	1.80734e-27	8	4	2	43	27	48	131.93	60.687	23.2964	1705	902.045	1551.89
chr5:169010893:169011091:chr5:169010638-169015579;refseq_id=NM_017785;ensg_id=ENSG00000040275;gsymbol=SPDL1;+:198:+	4.61437	0.971934	5.34321e-30	3.20405e-28	3	5	1	23	23	31	49.4739	75.8587	11.6482	911.975	768.408	1002.26
chr12:69018250:69018450:chr12:69004619-69042561;refseq_id=NM_015646,NM_001010942,NM_001251921,NM_001251917,NM_001251918,NM_001251922;ensg_id=ENSG00000127314;gsymbol=RAP1B;+:200:+	4.60423	-0.336833	1.11946e-09	9.49456e-09	1	2	0	15	7	6	16.4913	30.3435	0	594.766	233.863	193.986
chr2:71298615:71298815:chr2:71297871-71299881;refseq_id=NM_017567;ensg_id=ENSG00000124357;gsymbol=NAGK;+:200:+	4.58135	-0.339845	2.72072e-11	3.13112e-10	2	1	0	6	9	13	32.9826	15.1717	0	237.906	300.682	420.304
chr6:32132155:32132355:chr6:32130345-32134043;refseq_id=NM_005155,NM_030652;ensg_id=ENSG00000258388;gsymbol=EGFL8;+:200:+	4.58073	-0.702316	1.5131e-08	1.07521e-07	1	0	1	6	8	6	16.4913	0	11.6482	237.906	267.272	193.986
chr3:9860038:9860238:chr3:9859329-9862425;refseq_id=NM_001198793,NM_001025930;ensg_id=ENSG00000250151,ENSG00000214021;gsymbol=ARPC4-TTLL3,TTLL3;+:200:+	4.5793	2.16097	1.20404e-48	3.1657e-46	5	2	14	55	48	64	82.4565	30.3435	163.075	2180.81	1603.63	2069.19
chr4:176733400:176733600:chr4:176622726-176812905;refseq_id=NM_001261448,NM_201591,NM_005277,NM_201592,NM_001256862,NM_001256863;ensg_id=ENSG00000150625;gsymbol=GPM6A;-:200:-	4.57838	1.94344	2.06952e-47	5.05259e-45	8	2	8	37	48	61	131.93	30.3435	93.1858	1467.09	1603.63	1972.2
chr16:28884290:28884490:chr16:28883855-28885534;refseq_id=NA;ensg_id=NA;gsymbol=NA;+:200:+	4.57772	-0.700204	1.53781e-07	8.90887e-07	1	1	0	6	3	11	16.4913	15.1717	0	237.906	100.227	355.642
chr17:73224892:73225092:chr17:73222146-73227518;refseq_id=NM_024844;ensg_id=ENSG00000125450;gsymbol=NUP85;+:200:+	4.55838	-0.702271	1.4685e-07	8.55084e-07	1	1	0	2	9	9	16.4913	15.1717	0	79.3021	300.682	290.98
chr15:60770836:60771036:chr15:60768262-60771344;refseq_id=NM_024611,NM_001018089;ensg_id=ENSG00000128915;gsymbol=NARG2;-:200:-	4.54619	1.51023	3.26498e-34	2.86146e-32	2	4	8	44	34	32	32.9826	60.687	93.1858	1744.65	1135.91	1034.59
chr2:130915838:130916038:chr2:130914824-130918845;refseq_id=NM_001171083,NM_017951,NR_033231,NM_017751,NR_033232;ensg_id=ENSG00000136699;gsymbol=SMPD4;-:200:-	4.54476	0.376877	3.45817e-19	9.23439e-18	1	2	3	17	13	20	16.4913	30.3435	34.9447	674.068	434.318	646.621
chr17:61905010:61905210:chr17:61904770-61905569;refseq_id=NM_002805;ensg_id=ENSG00000087191;gsymbol=PSMC5;+:200:+	4.53513	-0.378298	1.49805e-11	1.79032e-10	2	0	1	6	11	10	32.9826	0	11.6482	237.906	367.5	323.311
chr16:448007:448207:chr16:447192-449123;refseq_id=NA;ensg_id=ENSG00000103202;gsymbol=NME4;+:200:+	4.51436	1.27439	1.46323e-33	1.1631e-31	3	5	4	31	25	38	49.4739	75.8587	46.5929	1229.18	835.227	1228.58
chr15:60770849:60771049:chr15:60768262-60771344;refseq_id=NM_024611,NM_001018089;ensg_id=ENSG00000128915;gsymbol=NARG2;-:200:-	4.50954	1.47254	1.87294e-32	1.30647e-30	3	3	8	44	31	32	49.4739	45.5152	93.1858	1744.65	1035.68	1034.59
chr15:60770859:60771059:chr15:60768262-60771344;refseq_id=NM_024611,NM_001018089;ensg_id=ENSG00000128915;gsymbol=NARG2;-:200:-	4.50954	1.47254	1.8678e-32	1.30647e-30	3	3	8	44	31	32	49.4739	45.5152	93.1858	1744.65	1035.68	1034.59
chr7:135298268:135298468:chr7:135291995-135299021;refseq_id=NM_015135;ensg_id=ENSG00000155561;gsymbol=NUP205;+:200:+	4.50758	-0.750087	3.09873e-08	2.04074e-07	0	0	2	6	7	6	0	0	23.2964	237.906	233.863	193.986
chr11:504888:505088:chr11:502062-506821;refseq_id=NM_203385,NM_203384,NM_203388,NM_203386,NM_203387,NM_203389;ensg_id=ENSG00000023191;gsymbol=RNH1;-:200:-	4.48808	1.57013	4.93499e-38	6.74712e-36	2	7	6	40	32	42	32.9826	106.202	69.8893	1586.04	1069.09	1357.9
chr15:89866742:89866942:chr15:89865973-89867132;refseq_id=NM_002693,NM_001126131;ensg_id=ENSG00000140521;gsymbol=POLG;-:200:-	4.47848	0.126971	1.10573e-14	2.02106e-13	2	3	0	10	10	21	32.9826	45.5152	0	396.511	334.091	678.952
chr2:73830857:73831057:chr2:73830368-73835701;refseq_id=NM_015120;ensg_id=ENSG00000116127;gsymbol=ALMS1;+:200:+	4.4653	0.0966439	4.53957e-16	9.88296e-15	1	1	3	16	11	13	16.4913	15.1717	34.9447	634.417	367.5	420.304
chr20:62520342:62520542:chr20:62514072-62522898;refseq_id=NM_199362,NM_199363,NM_001243894,NM_001243892,NM_199359,NM_001243895,NM_003288,NR_045090,NM_001243891,NM_199360,NM_199361;ensg_id=ENSG00000101150;gsymbol=TPD52L2;+:200:+	4.46015	0.824671	1.61728e-28	8.50438e-27	1	3	5	23	22	24	16.4913	45.5152	58.2411	911.975	734.999	775.946
chr18:6926224:6926424:chr18:6925473-6926557;refseq_id=NA;ensg_id=ENSG00000265933;gsymbol=LINC00668;-:200:-	4.44605	0.81178	4.66765e-20	1.34067e-18	5	1	3	25	14	29	82.4565	15.1717	34.9447	991.277	467.727	937.601
chr18:3596376:3596576:chr18:3594418-3597370;refseq_id=NA;ensg_id=ENSG00000177337;gsymbol=DLGAP1-AS1;+:200:+	4.44228	1.08349	1.41799e-25	6.13503e-24	5	3	3	33	20	29	82.4565	45.5152	34.9447	1308.49	668.181	937.601
chr10:124610066:124610266:chr10:124608610-124615302;refseq_id=NM_022034,NM_152644;ensg_id=ENSG00000213185,ENSG00000138161;gsymbol=FAM24B,CUZD1;-:200:-	4.44043	1.32706	9.77225e-22	3.21169e-20	4	5	4	26	19	52	65.9652	75.8587	46.5929	1030.93	634.772	1681.22
chr14:96135687:96135887:chr14:96134463-96136914;refseq_id=NR_028288;ensg_id=ENSG00000187621,ENSG00000259084;gsymbol=TCL6,RP11-1070N10.6;+:200:+	4.43818	0.808107	7.40433e-27	3.515e-25	2	4	3	20	20	28	32.9826	60.687	34.9447	793.021	668.181	905.27
chr1:15891476:15891676:chr1:15890778-15892494;refseq_id=NM_015291;ensg_id=ENSG00000116138;gsymbol=DNAJC16;+:200:+	4.42662	-0.45067	5.66543e-10	5.05599e-09	2	1	0	11	8	6	32.9826	15.1717	0	436.162	267.272	193.986
chr15:85235351:85235551:chr15:85234766-85259691;refseq_id=NM_001271918,NM_001267864,NM_001267863,NM_152446,NM_014300,NR_102737,NR_102738;ensg_id=ENSG00000140612;gsymbol=SEC11A;-:200:-	4.42492	-0.45445	5.97369e-11	6.45755e-10	1	1	1	6	9	10	16.4913	15.1717	11.6482	237.906	300.682	323.311
chr20:23421288:23421488:chr20:23420781-23424681;refseq_id=NM_138283;ensg_id=ENSG00000125823;gsymbol=CSTL1;+:200:+	4.42349	0.277174	1.37716e-13	2.15923e-12	1	2	3	11	10	25	16.4913	30.3435	34.9447	436.162	334.091	808.277
chr4:99807697:99807897:chr4:99806073-99808343;refseq_id=NM_001130678,NM_001130679,NM_001968;ensg_id=ENSG00000151247;gsymbol=EIF4E;-:200:-	4.41745	2.34224	2.53683e-54	2.00129e-51	5	8	13	60	54	71	82.4565	121.374	151.427	2379.06	1804.09	2295.51
chr1:21219222:21219422:chr1:21212694-21220129;refseq_id=NM_003760,NM_001198801,NM_001198802;ensg_id=ENSG00000075151;gsymbol=EIF4G3;-:200:-	4.40016	1.84495	3.39197e-34	2.89844e-32	5	8	6	47	33	55	82.4565	121.374	69.8893	1863.6	1102.5	1778.21
chr13:42799225:42799425:chr13:42795400-42803891;refseq_id=NA;ensg_id=ENSG00000102780;gsymbol=DGKH;+:200:+	4.38105	0.7515	7.79983e-25	3.17379e-23	1	4	4	24	18	23	16.4913	60.687	46.5929	951.626	601.363	743.615
chr2:242443511:242443711:chr2:242440893-242447997;refseq_id=NM_001271978,NM_006374,NM_001271977,NM_001271980,NM_001271979,NR_073531;ensg_id=ENSG00000115694;gsymbol=STK25;-:200:-	4.36818	-0.493139	3.37345e-10	3.1852e-09	0	2	1	9	9	6	0	30.3435	11.6482	356.86	300.682	193.986
chr17:42286369:42286569:chr17:42285232-42286909;refseq_id=NM_014233,NM_001076684,NM_001076683;ensg_id=ENSG00000108312;gsymbol=UBTF;-:200:-	4.36652	-0.492971	1.19297e-10	1.24316e-09	1	1	1	8	8	8	16.4913	15.1717	11.6482	317.209	267.272	258.649
chr22:22325433:22325633:chr22:22324582-22326323;refseq_id=NM_003935;ensg_id=ENSG00000100038;gsymbol=TOP3B;-:200:-	4.3663	-0.492689	6.61547e-10	5.84281e-09	2	0	1	7	6	11	32.9826	0	11.6482	277.557	200.454	355.642
chr1:1250998:1251198:chr1:1250204-1256473;refseq_id=NM_017871,NM_001256463,NM_001256462,NM_001256456,NM_001256460;ensg_id=ENSG00000127054;gsymbol=CPSF3L;-:200:-	4.35968	-0.843507	1.21176e-06	5.97661e-06	1	0	1	6	2	9	16.4913	0	11.6482	237.906	66.8181	290.98
chr5:177658830:177659030:chr5:177658406-177659803;refseq_id=NA;ensg_id=NA;gsymbol=NA;-:200:-	4.35876	0.225224	1.07255e-17	2.65649e-16	1	1	4	13	12	19	16.4913	15.1717	46.5929	515.464	400.909	614.29
chr15:37391800:37392000:chr15:37390168-37393500;refseq_id=NM_002399;ensg_id=ENSG00000134138;gsymbol=MEIS2;-:200:-	4.34082	2.77699	5.74897e-64	1.965e-60	7	8	21	72	74	95	115.439	121.374	244.613	2854.88	2472.27	3071.45
chr11:113091817:113092017:chr11:113085091-113102517;refseq_id=NM_001076682,NM_001242608,NM_001242607,NM_181351,NM_000615;ensg_id=ENSG00000149294;gsymbol=NCAM1;+:200:+	4.33897	0.402051	1.2449e-16	2.93452e-15	3	3	1	21	13	16	49.4739	45.5152	11.6482	832.672	434.318	517.297
chr2:114351664:114351864:chr2:114346127-114352738;refseq_id=NR_024077;ensg_id=ENSG00000146556;gsymbol=WASH2P;+:200:+	4.33573	0.855006	8.15784e-29	4.57106e-27	1	4	5	17	27	26	16.4913	60.687	58.2411	674.068	902.045	840.608
chr22:51221473:51221673:chr22:51220616-51222087;refseq_id=NM_001130921,NM_001003789,NM_001130922,NM_001130919,NM_007081;ensg_id=ENSG00000079974;gsymbol=RABL2B;-:200:-	4.33538	1.69781	9.96141e-35	9.72803e-33	5	5	8	32	35	56	82.4565	75.8587	93.1858	1268.83	1169.32	1810.54
chr7:23727646:23727846:chr7:23724118-23729078;refseq_id=NM_199136,NM_001127364,NM_001127365;ensg_id=ENSG00000188732;gsymbol=FAM221A;+:200:+	4.31557	1.82384	8.4161e-42	1.43831e-39	3	5	12	45	38	50	49.4739	75.8587	139.779	1784.3	1269.54	1616.55
chr5:140063252:140063452:chr5:140062685-140070529;refseq_id=NM_002109,NM_001258041,NM_001258040,NM_001258042;ensg_id=ENSG00000170445;gsymbol=HARS;-:200:-	4.31306	1.31017	2.7236e-35	3.00299e-33	7	2	5	32	34	29	115.439	30.3435	58.2411	1268.83	1135.91	937.601
chr2:242688079:242688279:chr2:242684124-242689709;refseq_id=NM_152783;ensg_id=ENSG00000180902;gsymbol=D2HGDH;+:200:+	4.31182	-0.537396	1.79776e-09	1.49144e-08	0	0	3	7	11	5	0	0	34.9447	277.557	367.5	161.655
chr11:85779775:85779975:chr11:85742511-85780923;refseq_id=NA;ensg_id=ENSG00000073921;gsymbol=PICALM;-:200:-	4.30846	-0.534959	5.32296e-10	4.82597e-09	0	1	2	8	6	9	0	15.1717	23.2964	317.209	200.454	290.98
chr22:41180608:41180808:chr22:41175013-41188680;refseq_id=NM_006358;ensg_id=ENSG00000100372;gsymbol=SLC25A17;-:200:-	4.3055	-0.53175	4.75839e-10	4.37209e-09	3	0	0	6	9	8	49.4739	0	0	237.906	300.682	258.649
chr17:8113543:8113743:chr17:8111056-8113883;refseq_id=NM_004217,NM_001256834;ensg_id=ENSG00000178999;gsymbol=AURKB;-:200:-	4.29248	2.28295	2.64089e-39	4.29837e-37	5	12	10	52	47	78	82.4565	182.061	116.482	2061.86	1570.23	2521.82
chr21:35281515:35281715:chr21:35279645-35284703;refseq_id=NM_001697;ensg_id=ENSG00000241837;gsymbol=ATP5O;-:200:-	4.2884	1.17684	1.8336e-35	2.08908e-33	3	4	6	24	32	31	49.4739	60.687	69.8893	951.626	1069.09	1002.26
chr12:47600368:47600568:chr12:47599681-47603241;refseq_id=NA;ensg_id=ENSG00000247774;gsymbol=PCED1B-AS1;-:200:-	4.28327	-0.0444569	1.95753e-10	1.95068e-09	3	1	1	18	7	10	49.4739	15.1717	11.6482	713.719	233.863	323.311
chr12:47600371:47600571:chr12:47599681-47610047;refseq_id=NA;ensg_id=ENSG00000247774;gsymbol=PCED1B-AS1;-:200:-	4.28326	-0.0444569	1.94263e-10	1.94149e-09	3	1	1	18	7	10	49.4739	15.1717	11.6482	713.719	233.863	323.311
chr1:169796651:169796851:chr1:169796192-169798590;refseq_id=NM_018186;ensg_id=ENSG00000000460;gsymbol=C1orf112;+:200:+	4.27533	1.80863	2.66761e-37	3.50688e-35	6	9	5	41	36	54	98.9479	136.546	58.2411	1625.69	1202.73	1745.88
chr2:66666774:66666974:chr2:66664869-66667744;refseq_id=NM_002398;ensg_id=ENSG00000143995;gsymbol=MEIS1;+:200:+	4.25783	0.781048	5.09589e-21	1.62783e-19	2	2	6	16	18	32	32.9826	30.3435	69.8893	634.417	601.363	1034.59
chr7:32973118:32973318:chr7:32969690-32973508;refseq_id=NR_003500;ensg_id=ENSG00000205763;gsymbol=RP9P;-:200:-	4.25211	0.150061	1.26542e-16	2.96248e-15	2	3	1	12	11	18	32.9826	45.5152	11.6482	475.813	367.5	581.959
chr5:177658867:177659067:chr5:177658406-177659803;refseq_id=NA;ensg_id=NA;gsymbol=NA;-:200:-	4.24927	-0.0807769	5.05976e-10	4.62413e-09	1	1	3	12	5	17	16.4913	15.1717	34.9447	475.813	167.045	549.628
chr12:69018254:69018454:chr12:69004619-69042561;refseq_id=NM_015646,NM_001010942,NM_001251921,NM_001251917,NM_001251918,NM_001251922;ensg_id=ENSG00000127314;gsymbol=RAP1B;+:200:+	4.24427	-0.30435	1.90588e-08	1.31072e-07	1	3	0	15	7	6	16.4913	45.5152	0	594.766	233.863	193.986
chr1:151734486:151734580:chr1:151733927-151734631;refseq_id=NM_031420;ensg_id=ENSG00000143436;gsymbol=MRPL9;-:94:-	4.23366	-0.0784509	3.6757e-13	5.58379e-12	2	1	2	15	10	9	32.9826	15.1717	23.2964	594.766	334.091	290.98
chr2:113303207:113303407:chr2:113299492-113304756;refseq_id=NM_019014,NM_001137604;ensg_id=ENSG00000125630;gsymbol=POLR1B;+:200:+	4.23103	-0.0825863	8.38373e-13	1.21939e-11	0	2	3	9	8	17	0	30.3435	34.9447	356.86	267.272	549.628
chr16:28490907:28491107:chr16:28489058-28493519;refseq_id=NM_001042432,NM_000086;ensg_id=ENSG00000188603,ENSG00000261832;gsymbol=CLN3;-:200:-	4.20926	-0.0822536	3.35981e-12	4.4511e-11	2	1	2	5	12	17	32.9826	15.1717	23.2964	198.255	400.909	549.628
chr2:77748944:77749144:chr2:77745444-77749502;refseq_id=NM_024993;ensg_id=ENSG00000176204;gsymbol=LRRTM4;-:200:-	4.18513	-0.618689	3.36906e-08	2.1976e-07	1	0	2	8	10	3	16.4913	0	23.2964	317.209	334.091	96.9932
chr15:85190254:85190454:chr15:85189415-85191185;refseq_id=NM_032856;ensg_id=ENSG00000177082;gsymbol=WDR73;-:200:-	4.1816	1.8551	6.41856e-39	9.53854e-37	8	6	8	46	37	51	131.93	91.0305	93.1858	1823.95	1236.14	1648.88
chr2:242255636:242255836:chr2:242255281-242257014;refseq_id=NM_001008491,NM_006155,NM_004404;ensg_id=ENSG00000168385;gsymbol=SEPT2;+:200:+	4.17845	-0.346488	7.50232e-12	9.35873e-11	0	2	2	8	10	9	0	30.3435	23.2964	317.209	334.091	290.98
chr2:242255644:242255844:chr2:242255281-242257014;refseq_id=NM_001008491,NM_006155,NM_004404;ensg_id=ENSG00000168385;gsymbol=SEPT2;+:200:+	4.17845	-0.346488	7.50232e-12	9.35873e-11	0	2	2	8	10	9	0	30.3435	23.2964	317.209	334.091	290.98
chr14:91689822:91690022:chr14:91681749-91691703;refseq_id=NM_001102368,NM_024952;ensg_id=ENSG00000133943;gsymbol=C14orf159;+:200:+	4.17579	-0.615059	6.83803e-09	5.12552e-08	1	2	0	8	5	8	16.4913	30.3435	0	317.209	167.045	258.649
chr1:148566581:148566781:chr1:148560847-148568877;refseq_id=NM_001170755,NM_173638;ensg_id=ENSG00000243452;gsymbol=NBPF15;+:200:+	4.17561	-0.946176	8.29246e-06	3.51222e-05	1	0	1	6	8	1	16.4913	0	11.6482	237.906	267.272	32.3311
chr16:70381577:70381777:chr16:70380824-70384508;refseq_id=NM_001257175,NM_007242,NM_018332;ensg_id=ENSG00000260537,ENSG00000168872;gsymbol=DDX19B,DDX19A;+:200:+	4.15322	2.59067	1.69473e-42	3.21811e-40	8	14	14	83	65	63	131.93	212.404	163.075	3291.04	2171.59	2036.86
chr17:73204049:73204249:chr17:73201815-73204715;refseq_id=NM_024844;ensg_id=ENSG00000125450;gsymbol=NUP85;+:200:+	4.1509	1.48443	3.87879e-23	1.42556e-21	2	6	10	44	22	39	32.9826	91.0305	116.482	1744.65	734.999	1260.91
chr1:151239215:151239415:chr1:151238996-151239954;refseq_id=NM_002810;ensg_id=ENSG00000159352;gsymbol=PSMD4;+:200:+	4.12435	-0.383929	2.9914e-11	3.40821e-10	0	2	2	6	10	10	0	30.3435	23.2964	237.906	334.091	323.311
chr1:155678623:155678823:chr1:155658882-155679615;refseq_id=NM_001199849,NM_004632,NM_001199851,NM_001199850,NM_033657;ensg_id=ENSG00000132676,ENSG00000125459,ENSG00000203761;gsymbol=DAP3,MSTO1,RP11-243J18.3;+:200:+	4.11625	-0.660083	3.10801e-07	1.67558e-06	1	1	1	7	2	11	16.4913	15.1717	11.6482	277.557	66.8181	355.642
chr15:78452233:78452433:chr15:78449890-78454110;refseq_id=NM_005530;ensg_id=ENSG00000166411;gsymbol=IDH3A;+:200:+	4.11168	0.668208	5.88973e-23	2.07537e-21	2	6	2	14	23	23	32.9826	91.0305	23.2964	555.115	768.408	743.615
chr6:30618570:30618770:chr6:30614816-30619243;refseq_id=NM_001161376,NM_001109938,NM_145029;ensg_id=ENSG00000204564;gsymbol=C6orf136;+:200:+	4.10792	0.370455	3.36662e-15	6.69018e-14	1	4	3	17	10	21	16.4913	60.687	34.9447	674.068	334.091	678.952
chr19:9923950:9924150:chr19:9920943-9929293;refseq_id=NM_017703;ensg_id=ENSG00000127452;gsymbol=FBXL12;-:200:-	4.1059	-0.661057	8.56031e-09	6.30585e-08	0	2	1	7	7	6	0	30.3435	11.6482	277.557	233.863	193.986
chr19:36234246:36234446:chr19:36233428-36234805;refseq_id=NM_024660;ensg_id=ENSG00000267120,ENSG00000161265;gsymbol=AD000671.6,U2AF1L4;-:200:-	4.10024	1.29983	2.35751e-34	2.23833e-32	5	3	8	30	28	35	82.4565	45.5152	93.1858	1189.53	935.454	1131.59
chr1:35485203:35485403:chr1:35480589-35486068;refseq_id=NM_007167;ensg_id=ENSG00000163867;gsymbol=ZMYM6;-:200:-	4.09964	0.906968	3.14463e-19	8.46325e-18	3	6	3	19	17	35	49.4739	91.0305	34.9447	753.37	567.954	1131.59
chr8:124824095:124824295:chr8:124822522-124827690;refseq_id=NM_144963;ensg_id=ENSG00000176853;gsymbol=FAM91A1;+:200:+	4.09554	0.370495	1.4867e-18	3.87904e-17	3	3	2	13	15	20	49.4739	45.5152	23.2964	515.464	501.136	646.621
chr17:45247408:45247608:chr17:45235572-45259003;refseq_id=NM_001114091,NM_001256;ensg_id=ENSG00000004897;gsymbol=CDC27;-:200:-	4.08623	2.69643	6.00769e-35	6.03949e-33	14	9	17	69	54	102	230.878	136.546	198.02	2735.92	1804.09	3297.77
chr2:74432631:74432831:chr2:74425690-74434953;refseq_id=NR_027405,NM_006636;ensg_id=ENSG00000065911;gsymbol=MTHFD2;+:200:+	4.08425	-0.17218	3.19392e-11	3.61484e-10	4	1	0	11	13	7	65.9652	15.1717	0	436.162	434.318	226.317
chr2:148779016:148779216:chr2:148778580-148936362;refseq_id=NM_018328;ensg_id=ENSG00000204406;gsymbol=MBD5;+:200:+	4.07779	1.8117	1.73359e-45	3.70338e-43	5	4	14	41	41	48	82.4565	60.687	163.075	1625.69	1369.77	1551.89
chr12:9576944:9577123:chr12:9574414-9577236;refseq_id=NR_033399;ensg_id=ENSG00000214826;gsymbol=DDX12P;-:179:-	4.07248	-0.422649	2.50728e-10	2.44156e-09	0	1	3	6	7	12	0	15.1717	34.9447	237.906	233.863	387.973
chrX:48434055:48434202:chrX:48433949-48434807;refseq_id=NM_006743;ensg_id=ENSG00000102317;gsymbol=RBM3;+:147:+	4.06866	2.73046	1.24096e-63	2.1208e-60	16	11	14	64	75	91	263.861	166.889	163.075	2537.67	2505.68	2942.13
chr1:46521643:46521843:chr1:46512223-46527743;refseq_id=NM_003629,NM_001114172;ensg_id=ENSG00000117461;gsymbol=PIK3R3;-:200:-	4.06678	0.00335903	1.87371e-15	3.83494e-14	2	0	4	9	13	14	32.9826	0	46.5929	356.86	434.318	452.635
chr8:144672908:144673108:chr8:144671161-144678924;refseq_id=NM_001130055,NM_001960,NM_001195203,NM_001130056,NM_001130057,NM_001130053,NM_032378;ensg_id=ENSG00000104529;gsymbol=EEF1D;-:200:-	4.05935	0.344202	1.12662e-15	2.39673e-14	3	2	3	10	14	23	49.4739	30.3435	34.9447	396.511	467.727	743.615
chr8:144672905:144673105:chr8:144671161-144675063;refseq_id=NM_001130055,NM_001960,NM_001195203,NM_001130056,NM_001130057,NM_001130053,NM_032378;ensg_id=ENSG00000104529;gsymbol=EEF1D;-:200:-	4.05935	0.344202	1.12894e-15	2.39673e-14	3	2	3	10	14	23	49.4739	30.3435	34.9447	396.511	467.727	743.615
chr8:144672899:144673099:chr8:144671161-144679845;refseq_id=NM_001130055,NM_001960,NM_001195203,NM_001130056,NM_001130053,NM_032378;ensg_id=ENSG00000104529;gsymbol=EEF1D;-:200:-	4.05934	0.344202	1.14512e-15	2.41606e-14	3	2	3	10	14	23	49.4739	30.3435	34.9447	396.511	467.727	743.615
chr16:1735239:1735439:chr16:1728278-1741986;refseq_id=NM_144570;ensg_id=ENSG00000206053;gsymbol=HN1L;+:200:+	4.05544	0.969739	1.29518e-29	7.63262e-28	4	3	6	23	26	25	65.9652	45.5152	69.8893	911.975	868.636	808.277
chr19:15234387:15234587:chr19:15233927-15235880;refseq_id=NM_006844;ensg_id=ENSG00000105135;gsymbol=ILVBL;-:200:-	4.05	-0.212825	3.93185e-12	5.12942e-11	1	0	4	8	8	14	16.4913	0	46.5929	317.209	267.272	452.635
chr19:48752890:48753007:chr19:48744219-48753104;refseq_id=NM_001184903,NM_014959,NM_001184901,NM_001184904;ensg_id=ENSG00000105483;gsymbol=CARD8;-:117:-	4.03362	-0.458076	2.30386e-07	1.28251e-06	0	2	2	9	3	12	0	30.3435	23.2964	356.86	100.227	387.973
chr1:151534860:151535060:chr1:151512781-151536466;refseq_id=NM_020127,NM_001126337;ensg_id=ENSG00000143367;gsymbol=TUFT1;+:200:+	4.02793	-0.46108	7.45174e-10	6.46676e-09	0	0	4	10	6	8	0	0	46.5929	396.511	200.454	258.649
chr1:151534868:151535068:chr1:151512781-151536466;refseq_id=NM_020127,NM_001126337;ensg_id=ENSG00000143367;gsymbol=TUFT1;+:200:+	4.02785	-0.46108	7.37519e-10	6.43071e-09	0	0	4	10	6	8	0	0	46.5929	396.511	200.454	258.649
chr7:100454289:100454489:chr7:100451778-100456564;refseq_id=NM_001267814,NM_001320,NM_020246;ensg_id=ENSG00000146828;gsymbol=SLC12A9;+:200:+	4.01598	0.932403	9.93529e-29	5.40492e-27	3	3	7	19	27	26	49.4739	45.5152	81.5376	753.37	902.045	840.608
chr15:42135123:42135323:chr15:42134752-42136009;refseq_id=NM_001114632,NM_005090,NM_001198588,NM_001114633;ensg_id=ENSG00000243708,ENSG00000168970;gsymbol=PLA2G4B,JMJD7-PLA2G4B;+:200:+	4.01359	0.431862	8.63008e-14	1.3914e-12	2	1	6	13	11	26	32.9826	15.1717	69.8893	515.464	367.5	840.608
chr20:30142348:30142548:chr20:30137867-30147450;refseq_id=NM_178581,NM_030789,NM_178580;ensg_id=ENSG00000101294;gsymbol=HM13;+:200:+	4.01312	1.38943	3.73401e-27	1.84969e-25	1	10	7	29	26	43	16.4913	151.717	81.5376	1149.88	868.636	1390.24
chr7:100274774:100274974:chr7:100271363-100275283;refseq_id=NM_005273;ensg_id=ENSG00000172354;gsymbol=GNB2;+:200:+	4.01185	-0.458717	5.38501e-10	4.85646e-09	1	1	2	7	6	11	16.4913	15.1717	23.2964	277.557	200.454	355.642
chr15:75645879:75646079:chr15:75644943-75646618;refseq_id=NM_024608,NR_073137,NM_001256552;ensg_id=ENSG00000140398;gsymbol=NEIL1;+:200:+	4.00411	-0.457847	7.45437e-10	6.46676e-09	2	1	1	6	12	6	32.9826	15.1717	11.6482	237.906	400.909	193.986
chr15:52856443:52856643:chr15:52849297-52861099;refseq_id=NM_006628;ensg_id=ENSG00000128989;gsymbol=ARPP19;-:200:-	4.00387	-0.278534	2.75996e-08	1.8461e-07	1	0	4	14	4	10	16.4913	0	46.5929	555.115	133.636	323.311
chr12:49524127:49524327:chr12:49523283-49525178;refseq_id=NM_006082;ensg_id=ENSG00000123416;gsymbol=TUBA1B;-:200:-	3.99497	-0.242907	1.88188e-12	2.61474e-11	1	3	1	7	11	11	16.4913	45.5152	11.6482	277.557	367.5	355.642
chr12:57109990:57110190:chr12:57108386-57113380;refseq_id=NM_001113203,NM_001113202;ensg_id=ENSG00000196531;gsymbol=NACA;-:200:-	3.96522	0.979087	5.43169e-25	2.29204e-23	3	1	10	26	28	20	49.4739	15.1717	116.482	1030.93	935.454	646.621
chr1:154184854:154184933:chr1:154179183-154185100;refseq_id=NM_001098616;ensg_id=ENSG00000143612;gsymbol=C1orf43;-:79:-	3.95918	-0.753369	2.007e-07	1.12828e-06	1	0	2	6	9	3	16.4913	0	23.2964	237.906	300.682	96.9932
chr7:45150476:45150676:chr7:45148426-45151317;refseq_id=NM_030900,NM_199122;ensg_id=ENSG00000136270;gsymbol=TBRG4;-:200:-	3.95917	-0.751145	2.71285e-07	1.48837e-06	1	1	1	6	3	9	16.4913	15.1717	11.6482	237.906	100.227	290.98
chrX:153060917:153061117:chrX:153060129-153062007;refseq_id=NR_037927,NM_006280,NM_001204527,NM_001204526;ensg_id=ENSG00000180879;gsymbol=SSR4;+:200:+	3.95722	-0.276515	1.19353e-09	1.00728e-08	1	2	2	12	6	10	16.4913	30.3435	23.2964	475.813	200.454	323.311
chr19:38897349:38897549:chr19:38896159-38899728;refseq_id=NA;ensg_id=ENSG00000130244;gsymbol=FAM98C;+:200:+	3.95691	0.392431	8.27898e-13	1.2093e-11	2	4	3	20	8	20	32.9826	60.687	34.9447	793.021	267.272	646.621
chr16:30370682:30370858:chr16:30369984-30370924;refseq_id=NM_015527;ensg_id=ENSG00000169221;gsymbol=TBC1D10B;-:176:-	3.95135	-0.753038	1.69326e-07	9.64596e-07	0	2	1	3	7	8	0	30.3435	11.6482	118.953	233.863	258.649
chr6:135816847:135816951:chr6:135813366-135817036;refseq_id=NM_001134832,NM_017651,NM_001134831,NM_001134830;ensg_id=ENSG00000135541;gsymbol=AHI1;-:104:-	3.94604	-0.274713	3.48126e-10	3.27795e-09	3	1	1	11	7	10	49.4739	15.1717	11.6482	436.162	233.863	323.311
chr8:37964338:37964538:chr8:37963896-37967985;refseq_id=NM_004674,NM_001105214,NM_001261832;ensg_id=ENSG00000129691;gsymbol=ASH2L;+:200:+	3.94479	-0.282314	3.75737e-12	4.95857e-11	0	1	4	7	12	9	0	15.1717	46.5929	277.557	400.909	290.98
chr17:40720287:40720487:chr17:40719637-40720961;refseq_id=NM_198204,NM_198205,NM_170607;ensg_id=ENSG00000108788;gsymbol=MLX;+:200:+	3.9418	-0.0837752	9.43478e-13	1.36068e-11	2	2	2	11	14	8	32.9826	30.3435	23.2964	436.162	467.727	258.649
chr12:132414079:132414279:chr12:132413745-132414680;refseq_id=NM_001002020;ensg_id=ENSG00000177192;gsymbol=PUS1;+:200:+	3.94088	-0.279558	1.37188e-11	1.65108e-10	1	2	2	5	11	12	16.4913	30.3435	23.2964	198.255	367.5	387.973
chr8:141756959:141757159:chr8:141754751-141762415;refseq_id=NM_153831,NM_001199649,NM_005607;ensg_id=ENSG00000169398;gsymbol=PTK2;-:200:-	3.93715	0.970986	5.44347e-22	1.84216e-20	4	6	4	26	18	29	65.9652	91.0305	46.5929	1030.93	601.363	937.601
chr17:7476517:7476717:chr17:7476144-7477626;refseq_id=NM_001416,NM_001204510;ensg_id=ENSG00000161960,ENSG00000264772,ENSG00000265500;gsymbol=EIF4A1,RP11-186B7.4,SENP3-EIF4A1;+:200:+	3.93609	0.246819	2.84716e-16	6.44476e-15	3	3	2	11	13	19	49.4739	45.5152	23.2964	436.162	434.318	614.29
chr13:111298978:111299178:chr13:111298314-111299586;refseq_id=NM_024537;ensg_id=ENSG00000134905;gsymbol=CARS2;-:200:-	3.9338	0.247395	1.07171e-11	1.31294e-10	2	4	2	12	8	23	32.9826	60.687	23.2964	475.813	267.272	743.615
chr11:504996:505196:chr11:502062-507283;refseq_id=NM_203389;ensg_id=ENSG00000023191;gsymbol=RNH1;-:200:-	3.91002	1.59535	4.70251e-35	5.02287e-33	5	9	8	39	33	39	82.4565	136.546	93.1858	1546.39	1102.5	1260.91
chr5:138609854:138610052:chr5:138609527-138611839;refseq_id=NM_199189;ensg_id=ENSG00000015479;gsymbol=MATR3;+:198:+	3.90601	0.365247	7.98273e-13	1.17608e-11	1	5	3	12	10	25	16.4913	75.8587	34.9447	475.813	334.091	808.277
chr5:138609852:138610052:chr5:138609441-138611839;refseq_id=NM_199189;ensg_id=ENSG00000015479;gsymbol=MATR3;+:200:+	3.90601	0.365247	8.08132e-13	1.18549e-11	1	5	3	12	10	25	16.4913	75.8587	34.9447	475.813	334.091	808.277
chr1:1324427:1324627:chr1:1323334-1325751;refseq_id=NM_030937,NM_001039577;ensg_id=ENSG00000221978;gsymbol=CCNL2;-:200:-	3.88515	-0.537881	9.50394e-10	8.18249e-09	1	2	1	5	9	8	16.4913	30.3435	11.6482	198.255	300.682	258.649
chr11:17098094:17098294:chr11:17097001-17098793;refseq_id=NM_001017;ensg_id=ENSG00000110700;gsymbol=RPS13;-:200:-	3.88301	-0.539391	1.21673e-08	8.78954e-08	1	1	2	6	12	4	16.4913	15.1717	23.2964	237.906	400.909	129.324
chr17:26898206:26898406:chr17:26897870-26898887;refseq_id=NM_033198;ensg_id=ENSG00000087111,ENSG00000258472;gsymbol=PIGS,RP11-192H23.4;-:200:-	3.87383	-0.79886	2.06906e-07	1.15935e-06	1	1	1	6	7	4	16.4913	15.1717	11.6482	237.906	233.863	129.324
chr3:97671096:97671296:chr3:97669630-97673339;refseq_id=NM_001261829,NM_153182,NM_032778,NM_001042533;ensg_id=ENSG00000170854;gsymbol=MINA;-:200:-	3.87328	-0.538577	1.59154e-07	9.17349e-07	1	2	1	3	9	10	16.4913	30.3435	11.6482	118.953	300.682	323.311
chr15:75655089:75655289:chr15:75654684-75657006;refseq_id=NM_001256495,NM_006715,NM_001256496,NM_001256494;ensg_id=ENSG00000140400;gsymbol=MAN2C1;-:200:-	3.86256	-0.144922	2.32751e-10	2.27298e-09	3	1	2	13	6	12	49.4739	15.1717	23.2964	515.464	200.454	387.973
chr2:47691218:47691418:chr2:47690170-47693947;refseq_id=NM_001258281,NM_000251;ensg_id=ENSG00000095002;gsymbol=MSH2;+:200:+	3.86216	0.0345756	2.48276e-14	4.3482e-13	2	4	1	12	12	12	32.9826	60.687	11.6482	475.813	400.909	387.973
chr9:36198775:36198975:chr9:36197548-36204176;refseq_id=NM_001184762,NM_001184760,NM_001833,NM_001184761,NM_007096,NM_001076677;ensg_id=ENSG00000122705;gsymbol=CLTA;+:200:+	3.85328	-0.143931	3.47766e-11	3.92298e-10	3	2	1	13	10	8	49.4739	30.3435	11.6482	515.464	334.091	258.649
chr2:198364162:198364362:chr2:198363399-198364640;refseq_id=NM_002156,NM_199440;ensg_id=ENSG00000144381;gsymbol=HSPD1;-:200:-	3.84607	-0.348609	6.28754e-09	4.7546e-08	1	2	2	9	5	12	16.4913	30.3435	23.2964	356.86	167.045	387.973
chrX:48434109:48434309:chrX:48433949-48434807;refseq_id=NM_006743;ensg_id=ENSG00000102317;gsymbol=RBM3;+:200:+	3.84059	2.46143	4.23021e-37	5.35513e-35	16	8	16	48	58	86	263.861	121.374	186.372	1903.25	1937.73	2780.47
chr11:63523383:63523583:chr11:63521134-63527363;refseq_id=NM_201428,NM_001265590;ensg_id=ENSG00000133318;gsymbol=RTN3;+:200:+	3.84031	-0.353953	6.15615e-11	6.6169e-10	0	1	4	5	10	11	0	15.1717	46.5929	198.255	334.091	355.642
chr6:117002501:117002609:chr6:117002367-117010616;refseq_id=NM_002269;ensg_id=ENSG00000196911;gsymbol=KPNA5;+:108:+	3.83604	-0.350229	2.732e-09	2.19004e-08	1	2	2	7	13	6	16.4913	30.3435	23.2964	277.557	434.318	193.986
chr7:30666472:30666672:chr7:30665850-30668285;refseq_id=NM_002047;ensg_id=ENSG00000106105;gsymbol=GARS;+:200:+	3.83072	-0.576592	1.90734e-06	9.02949e-06	2	1	1	9	2	10	32.9826	15.1717	11.6482	356.86	66.8181	323.311
chr1:151342030:151342188:chr1:151341480-151342245;refseq_id=NM_003944,NM_001258288,NM_001258289;ensg_id=ENSG00000143416;gsymbol=SELENBP1;-:158:-	3.82114	-0.0271949	1.37444e-09	1.15426e-08	0	3	4	16	6	12	0	45.5152	46.5929	634.417	200.454	387.973
chr15:65412292:65412492:chr15:65411714-65421508;refseq_id=NM_005707;ensg_id=ENSG00000090470;gsymbol=PDCD7;-:200:-	3.81898	-0.579611	2.82266e-09	2.24892e-08	2	0	2	6	6	9	32.9826	0	23.2964	237.906	200.454	290.98
chr13:41483615:41483815:chr13:41482294-41485941;refseq_id=NR_038258,NR_038259;ensg_id=ENSG00000168852;gsymbol=TPTE2P5;-:200:-	3.80346	-0.848533	1.37897e-06	6.66665e-06	1	0	2	6	2	8	16.4913	0	23.2964	237.906	66.8181	258.649
chr17:2239434:2239624:chr17:2238805-2240678;refseq_id=NM_018128;ensg_id=ENSG00000167721;gsymbol=TSR1;-:190:-	3.80297	2.06034	1.68551e-50	6.4012e-48	11	3	18	44	52	53	181.404	45.5152	209.668	1744.65	1737.27	1713.55
chr6:15652371:15652571:chr6:15637975-15663289;refseq_id=NA;ensg_id=ENSG00000047579;gsymbol=DTNBP1;-:200:-	3.79798	0.142709	1.68386e-15	3.50941e-14	3	3	2	14	13	12	49.4739	45.5152	23.2964	555.115	434.318	387.973
chr16:2984415:2984615:chr16:2983717-2987385;refseq_id=NM_020912,NM_032296;ensg_id=ENSG00000059122;gsymbol=FLYWCH1;+:200:+	3.79257	-0.849504	6.77361e-07	3.51323e-06	0	1	2	6	7	3	0	15.1717	23.2964	237.906	233.863	96.9932
chr19:7695917:7696117:chr19:7695709-7696510;refseq_id=NM_001171155,NR_033242;ensg_id=ENSG00000229833,ENSG00000268400;gsymbol=PET100,CTD-3214H19.4;+:200:+	3.79015	-0.382635	1.68322e-08	1.18623e-07	2	2	1	12	7	6	32.9826	30.3435	11.6482	475.813	233.863	193.986
chr8:110354718:110354918:chr8:110352718-110358189;refseq_id=NA;ensg_id=NA;gsymbol=NA;+:200:+	3.78754	-0.385573	7.70595e-09	5.70107e-08	1	2	2	10	10	5	16.4913	30.3435	23.2964	396.511	334.091	161.655
chr5:179956074:179956274:chr5:179921417-179977117;refseq_id=NM_015455;ensg_id=ENSG00000113300;gsymbol=CNOT6;+:200:+	3.78056	-0.0260779	4.0816e-13	6.17297e-12	1	4	2	11	9	14	16.4913	60.687	23.2964	436.162	300.682	452.635
chr3:9852104:9852304:chr3:9845527-9854795;refseq_id=NA;ensg_id=ENSG00000241553,ENSG00000250151;gsymbol=ARPC4,ARPC4-TTLL3;+:200:+	3.78022	-0.0276182	1.86208e-13	2.89299e-12	1	3	3	12	13	9	16.4913	45.5152	34.9447	475.813	434.318	290.98
chr15:91500142:91500342:chr15:91499842-91500955;refseq_id=NM_033544,NM_001017919;ensg_id=ENSG00000166965;gsymbol=RCCD1;+:200:+	3.7786	-0.385717	3.38208e-09	2.65746e-08	1	3	1	5	9	11	16.4913	45.5152	11.6482	198.255	300.682	355.642
chr4:2243564:2243764:chr4:2241765-2243860;refseq_id=NM_024511;ensg_id=ENSG00000214367;gsymbol=HAUS3;-:200:-	3.7681	-0.38635	2.76712e-08	1.84727e-07	0	4	1	4	8	13	0	60.687	11.6482	158.604	267.272	420.304
chr1:155279379:155279579:chr1:155278539-155279996;refseq_id=NM_001242824,NM_001135822,NM_001242825;ensg_id=ENSG00000160752;gsymbol=FDPS;+:200:+	3.76518	0.111225	6.97099e-12	8.7922e-11	2	2	4	10	9	19	32.9826	30.3435	46.5929	396.511	300.682	614.29
chr19:36000863:36001063:chr19:35996841-36001154;refseq_id=NM_001126056,NM_001190347,NM_033317,NM_001126059,NM_001035516,NM_001190348,NM_001126057,NM_001126058,NM_001190349;ensg_id=ENSG00000161249;gsymbol=DMKN;-:200:-	3.75218	-0.212941	7.0684e-08	4.30656e-07	2	2	2	7	5	17	32.9826	30.3435	23.2964	277.557	167.045	549.628
chr1:39466443:39466643:chr1:39463843-39469090;refseq_id=NM_024595,NM_001136275;ensg_id=ENSG00000174574;gsymbol=AKIRIN1;+:200:+	3.75029	0.241376	1.36681e-13	2.15288e-12	2	3	4	13	10	19	32.9826	45.5152	46.5929	515.464	334.091	614.29
chr1:24119297:24119497:chr1:24119147-24119706;refseq_id=NM_007260;ensg_id=ENSG00000011009;gsymbol=LYPLA2;+:200:+	3.74893	-0.622497	7.57439e-09	5.61589e-08	1	1	2	6	7	7	16.4913	15.1717	23.2964	237.906	233.863	226.317
chr19:39410789:39410989:chr19:39410402-39412086;refseq_id=NM_001145901,NM_017827;ensg_id=ENSG00000104835,ENSG00000269547;gsymbol=SARS2,FBXO17;-:200:-	3.74421	0.993613	7.21194e-25	2.96993e-23	6	5	5	18	25	30	98.9479	75.8587	58.2411	713.719	835.227	969.932
chrX:48380332:48380532:chrX:48380164-48382460;refseq_id=NM_006579;ensg_id=ENSG00000147155;gsymbol=EBP;+:200:+	3.73376	0.237647	2.86066e-12	3.86471e-11	1	4	4	6	17	19	16.4913	60.687	46.5929	237.906	567.954	614.29
chr8:37698077:37698277:chr8:37697639-37701504;refseq_id=NM_032777;ensg_id=ENSG00000020181;gsymbol=GPR124;+:200:+	3.72926	-0.421069	2.22258e-08	1.51935e-07	1	3	1	10	5	9	16.4913	45.5152	11.6482	396.511	167.045	290.98
chr17:3785664:3785821:chr17:3784921-3785858;refseq_id=NM_032294,NM_172206,NM_172207;ensg_id=ENSG00000004660;gsymbol=CAMKK1;-:157:-	3.72413	-0.424594	6.55337e-09	4.93379e-08	0	3	2	6	7	11	0	45.5152	23.2964	237.906	233.863	355.642
chr11:3005043:3005243:chr11:3000437-3009356;refseq_id=NM_005969;ensg_id=ENSG00000205531;gsymbol=NAP1L4;-:200:-	3.72238	0.0871387	1.26756e-14	2.29233e-13	3	3	2	12	11	14	49.4739	45.5152	23.2964	475.813	367.5	452.635
chr11:14378315:14378515:chr11:14317314-14380730;refseq_id=NM_001177315,NM_012250,NM_001102669,NM_001177314;ensg_id=ENSG00000133818;gsymbol=RRAS2;-:200:-	3.70877	-0.421328	1.88024e-08	1.29832e-07	3	2	0	4	9	11	49.4739	30.3435	0	158.604	300.682	355.642
chr17:34857801:34858001:chr17:34856909-34859040;refseq_id=NM_001163735,NM_025109,NM_001033580;ensg_id=ENSG00000141140;gsymbol=MYO19;-:200:-	3.70632	-0.246246	3.94538e-11	4.39261e-10	2	2	2	10	10	8	32.9826	30.3435	23.2964	396.511	334.091	258.649
chr3:49048653:49048853:chr3:49044637-49051549;refseq_id=NM_018031;ensg_id=ENSG00000178252;gsymbol=WDR6;+:200:+	3.69322	-0.0885306	1.39208e-12	1.96617e-11	2	2	3	10	10	12	32.9826	30.3435	34.9447	396.511	334.091	387.973
chr15:75639975:75640175:chr15:75639544-75641680;refseq_id=NM_024608;ensg_id=ENSG00000140398;gsymbol=NEIL1;+:200:+	3.67979	-0.665648	8.3313e-07	4.23756e-06	1	1	2	6	4	9	16.4913	15.1717	23.2964	237.906	133.636	290.98
chr18:5410618:5410818:chr18:5406776-5419930;refseq_id=NM_012307;ensg_id=ENSG00000082397;gsymbol=EPB41L3;-:200:-	3.67594	-0.666101	1.98877e-08	1.36498e-07	1	1	2	6	8	5	16.4913	15.1717	23.2964	237.906	267.272	161.655
chr19:50170075:50170275:chr19:50169942-50172194;refseq_id=NM_138639,NM_001256438,NM_001258221,NM_001040668,NM_001258222,NM_001271956,NM_001271951,NM_001271955,NM_001271953,NM_001271952,NR_049848;ensg_id=ENSG00000126453;gsymbol=BCL2L12;+:200:+	3.66861	0.309159	1.50292e-17	3.66927e-16	2	1	7	15	14	15	32.9826	15.1717	81.5376	594.766	467.727	484.966
chr19:50170078:50170278:chr19:50169942-50172194;refseq_id=NM_138639,NM_001256438,NM_001258221,NM_001040668,NM_001258222,NM_001271956,NM_001271951,NM_001271955,NM_001271953,NM_001271952,NR_049848;ensg_id=ENSG00000126453;gsymbol=BCL2L12;+:200:+	3.66861	0.309159	1.50292e-17	3.66927e-16	2	1	7	15	14	15	32.9826	15.1717	81.5376	594.766	467.727	484.966
chr9:123216151:123216351:chr9:123210173-123220900;refseq_id=NM_001272039,NM_018249,NR_073556,NR_073554,NR_073555,NR_073558,NR_073557,NM_001011649;ensg_id=ENSG00000136861;gsymbol=CDK5RAP2;-:200:-	3.66312	-0.465048	4.16375e-09	3.22314e-08	1	0	4	8	8	7	16.4913	0	46.5929	317.209	267.272	226.317
chr6:31939502:31939702:chr6:31938689-31940032;refseq_id=NM_005510;ensg_id=ENSG00000204348;gsymbol=DOM3Z;-:200:-	3.66186	-0.460547	4.13569e-08	2.6226e-07	1	3	1	7	5	11	16.4913	45.5152	11.6482	277.557	167.045	355.642
chr16:21628985:21629185:chr16:21623966-21636436;refseq_id=NM_016025,NM_001077180;ensg_id=ENSG00000197006;gsymbol=METTL9;+:200:+	3.65646	-0.278435	9.57413e-10	8.22221e-09	2	3	1	11	6	10	32.9826	45.5152	11.6482	436.162	200.454	323.311
chr1:2125572:2125772:chr1:2125078-2129581;refseq_id=NM_001146310;ensg_id=ENSG00000162585;gsymbol=C1orf86;-:200:-	3.65469	-0.280966	1.55588e-09	1.29392e-08	2	2	2	8	6	13	32.9826	30.3435	23.2964	317.209	200.454	420.304
chr14:73751082:73751282:chr14:73749067-73754022;refseq_id=NM_001005745,NM_001005744,NM_001005743,NM_003744;ensg_id=ENSG00000133961;gsymbol=NUMB;-:200:-	3.65342	-0.281153	2.77443e-10	2.6864e-09	3	1	2	7	8	12	49.4739	15.1717	23.2964	277.557	267.272	387.973
chr4:39460218:39460418:chr4:39459814-39460568;refseq_id=NM_000661;ensg_id=ENSG00000163682;gsymbol=RPL9;-:200:-	3.65211	0.512855	9.49141e-15	1.76313e-13	0	6	6	20	12	19	0	91.0305	69.8893	793.021	400.909	614.29
chr19:13002930:13003130:chr19:13002645-13004467;refseq_id=NM_013976,NM_000159,NR_102317,NR_102316;ensg_id=ENSG00000105607;gsymbol=GCDH;+:200:+	3.65062	0.397723	3.82199e-14	6.49459e-13	0	3	8	11	13	23	0	45.5152	93.1858	436.162	434.318	743.615
chr12:121004427:121004627:chr12:121003231-121009094;refseq_id=NM_014868;ensg_id=ENSG00000022840;gsymbol=RNF10;+:200:+	3.63789	-0.117853	9.36958e-09	6.88714e-08	4	1	2	8	6	17	65.9652	15.1717	23.2964	317.209	200.454	549.628
chr12:56745234:56745434:chr12:56744882-56748398;refseq_id=NM_198332,NM_005419;ensg_id=ENSG00000170581;gsymbol=STAT2;-:200:-	3.62735	0.490824	3.19647e-14	5.49023e-13	3	2	7	20	11	19	49.4739	30.3435	81.5376	793.021	367.5	614.29
chr19:14030430:14030630:chr19:14029943-14031481;refseq_id=NM_017721;ensg_id=ENSG00000132024;gsymbol=CC2D1A;+:200:+	3.62432	1.79362	5.6341e-34	4.69691e-32	6	11	13	43	36	44	98.9479	166.889	151.427	1705	1202.73	1422.57
chr3:160118409:160118609:chr3:160117430-160119881;refseq_id=NM_001002800,NM_005496;ensg_id=ENSG00000113810;gsymbol=SMC4;+:200:+	3.61456	0.783075	3.28814e-16	7.394e-15	5	2	8	18	14	30	82.4565	30.3435	93.1858	713.719	467.727	969.932
chr2:9985985:9986185:chr2:9985349-9989589;refseq_id=NM_005680;ensg_id=ENSG00000115750;gsymbol=TAF1B;+:200:+	3.61246	-0.000710886	4.51321e-11	4.9787e-10	3	1	4	14	8	12	49.4739	15.1717	46.5929	555.115	267.272	387.973
chr20:31984658:31984858:chr20:31982819-31989337;refseq_id=NM_001278168,NM_016408,NM_001278167,NM_001278169,NM_016082;ensg_id=ENSG00000101391;gsymbol=CDK5RAP1;-:200:-	3.60474	-0.497924	1.68393e-07	9.60881e-07	3	1	1	10	4	8	49.4739	15.1717	11.6482	396.511	133.636	258.649
chr17:79874015:79874215:chr17:79873487-79875595;refseq_id=NM_016538;ensg_id=ENSG00000187531;gsymbol=SIRT7;-:200:-	3.601	-0.709915	1.02098e-06	5.10936e-06	2	0	2	7	7	4	32.9826	0	23.2964	277.557	233.863	129.324
chr15:68492019:68492219:chr15:68489778-68498448;refseq_id=NA;ensg_id=ENSG00000260007;gsymbol=RP11-315D16.2;-:200:-	3.59313	0.49886	2.38172e-12	3.26937e-11	4	7	1	19	10	21	65.9652	106.202	11.6482	753.37	334.091	678.952
chr3:49048867:49049067:chr3:49046360-49050347;refseq_id=NM_018031;ensg_id=ENSG00000178252;gsymbol=WDR6;+:200:+	3.58666	0.469917	1.3108e-10	1.35767e-09	3	4	5	15	7	27	49.4739	60.687	58.2411	594.766	233.863	872.939
chr12:56676691:56676891:chr12:56676204-56679807;refseq_id=NM_004077;ensg_id=ENSG00000062485;gsymbol=CS;-:200:-	3.58044	0.856299	5.04078e-23	1.83291e-21	4	7	5	20	20	25	65.9652	106.202	58.2411	793.021	668.181	808.277
chr11:61188729:61188861:chr11:61187942-61189080;refseq_id=NM_001136040,NM_001142565,NM_024811;ensg_id=ENSG00000149532;gsymbol=CPSF7;-:132:-	3.56317	0.108851	1.24447e-11	1.50837e-10	1	5	3	10	9	18	16.4913	75.8587	34.9447	396.511	300.682	581.959
chr8:17359565:17359765:chr8:17354597-17401224;refseq_id=NM_001008539;ensg_id=ENSG00000003989;gsymbol=SLC7A2;+:200:+	3.56002	0.107541	3.78098e-12	4.97053e-11	4	1	4	10	18	9	65.9652	15.1717	46.5929	396.511	601.363	290.98
chr17:42809345:42809545:chr17:42808333-42811531;refseq_id=NM_025104,NM_145663,NR_036623;ensg_id=ENSG00000161692;gsymbol=DBF4B;+:200:+	3.55832	0.110344	5.13996e-09	3.92152e-08	4	2	3	10	6	21	65.9652	30.3435	34.9447	396.511	200.454	678.952
chr11:77818810:77819010:chr11:77817853-77820627;refseq_id=NM_024079,NM_001007027;ensg_id=ENSG00000159063;gsymbol=ALG8;-:200:-	3.54505	-0.543495	1.77415e-07	1.00565e-06	0	2	3	7	4	10	0	30.3435	34.9447	277.557	133.636	323.311
chr1:150314305:150314505:chr1:150312874-150315928;refseq_id=NM_004698;ensg_id=ENSG00000117360;gsymbol=PRPF3;+:200:+	3.5439	-0.351902	1.10354e-09	9.40622e-09	4	0	2	7	8	10	65.9652	0	23.2964	277.557	267.272	323.311
chr6:131959550:131959750:chr6:131958375-131962670;refseq_id=NM_005021;ensg_id=ENSG00000154269;gsymbol=ENPP3;+:200:+	3.53996	-0.389159	3.45547e-06	1.5561e-05	0	3	3	14	7	3	0	45.5152	34.9447	555.115	233.863	96.9932
chr12:50390987:50391187:chr12:50388197-50393054;refseq_id=NM_013277,NM_001126103,NM_001126104;ensg_id=ENSG00000161800;gsymbol=RACGAP1;-:200:-	3.53084	1.7038	5.49095e-29	3.12801e-27	5	11	14	38	31	46	82.4565	166.889	163.075	1506.74	1035.68	1487.23
chr8:82598198:82598398:chr8:82593733-82598589;refseq_id=NM_001144878,NM_005536,NM_001144879;ensg_id=ENSG00000133731;gsymbol=IMPA1;-:200:-	3.53079	-0.542788	5.58787e-08	3.46003e-07	2	1	2	4	9	8	32.9826	15.1717	23.2964	158.604	300.682	258.649
chr12:111172791:111172991:chr12:111169575-111180783;refseq_id=NA;ensg_id=NA;gsymbol=NA;-:200:-	3.52962	-0.214686	2.75488e-07	1.49939e-06	4	0	3	15	9	4	65.9652	0	34.9447	594.766	300.682	129.324
chr2:219523524:219523702:chr2:219520873-219523853;refseq_id=NM_001105537,NR_073599,NR_073600;ensg_id=ENSG00000115568;gsymbol=ZNF142;-:178:-	3.52576	-0.0637236	3.19592e-10	3.0428e-09	2	1	5	10	7	15	32.9826	15.1717	58.2411	396.511	233.863	484.966
chr5:56234165:56234365:chr5:56233405-56234844;refseq_id=NM_152622;ensg_id=ENSG00000155545;gsymbol=MIER3;-:200:-	3.52566	-0.54405	2.31263e-07	1.2853e-06	0	3	2	3	10	8	0	45.5152	23.2964	118.953	334.091	258.649
chr1:29547433:29547633:chr1:29543100-29557454;refseq_id=NA;ensg_id=NA;gsymbol=NA;-:200:-	3.52384	0.0785198	3.34704e-13	5.13013e-12	1	3	5	12	13	11	16.4913	45.5152	58.2411	475.813	434.318	355.642
chr20:30136567:30136767:chr20:30132750-30137924;refseq_id=NM_178581,NM_030789,NM_178580;ensg_id=ENSG00000101294;gsymbol=HM13;+:200:+	3.52222	0.0774884	2.77262e-09	2.21421e-08	3	1	5	6	10	20	49.4739	15.1717	58.2411	237.906	334.091	646.621
chrX:47034217:47034417:chrX:47032527-47035985;refseq_id=NM_005676,NM_001204468,NM_001204467,NM_001204466,NM_152856;ensg_id=ENSG00000182872;gsymbol=RBM10;+:200:+	3.51027	0.532555	3.15604e-15	6.30839e-14	8	1	4	11	19	21	131.93	15.1717	46.5929	436.162	634.772	678.952
chr1:155741008:155741208:chr1:155737216-155743001;refseq_id=NM_001037533,NM_032292;ensg_id=ENSG00000116580;gsymbol=GON4L;-:200:-	3.50715	-0.389979	2.80411e-08	1.86468e-07	0	3	3	11	5	8	0	45.5152	34.9447	436.162	167.045	258.649
chr15:91527370:91527570:chr15:91524978-91537804;refseq_id=NM_003981,NM_199413,NM_001267580;ensg_id=ENSG00000198901;gsymbol=PRC1;-:200:-	3.50465	1.3578	7.3862e-24	2.90184e-22	5	10	9	32	23	36	82.4565	151.717	104.834	1268.83	768.408	1163.92
chr12:6949832:6950032:chr12:6949375-6950508;refseq_id=NM_002075;ensg_id=ENSG00000111664;gsymbol=GNB3;+:200:+	3.5038	-0.224031	8.11006e-11	8.60876e-10	0	1	6	6	11	11	0	15.1717	69.8893	237.906	367.5	355.642
chr2:27595289:27595489:chr2:27594136-27596178;refseq_id=NR_049784,NR_049788,NM_001267061,NR_049783,NM_014748,NR_049786,NM_001267059,NR_049782,NM_001267060,NR_049785;ensg_id=ENSG00000115234;gsymbol=SNX17;+:200:+	3.5012	-0.216044	5.282e-10	4.81437e-09	4	1	2	7	9	12	65.9652	15.1717	23.2964	277.557	300.682	387.973
chr2:27595265:27595465:chr2:27594136-27596178;refseq_id=NR_049784,NR_049788,NM_001267061,NR_049783,NM_014748,NR_049786,NM_001267059,NR_049782,NM_001267060,NR_049785;ensg_id=ENSG00000115234;gsymbol=SNX17;+:200:+	3.50119	-0.216044	5.30475e-10	4.82225e-09	4	1	2	7	9	12	65.9652	15.1717	23.2964	277.557	300.682	387.973
chr8:23109680:23109880:chr8:23106723-23112945;refseq_id=NM_152272;ensg_id=ENSG00000147457;gsymbol=CHMP7;+:200:+	3.495	0.052995	1.68695e-11	1.98828e-10	1	4	4	14	8	13	16.4913	60.687	46.5929	555.115	267.272	420.304
chr2:27573499:27573699:chr2:27566175-27579868;refseq_id=NM_001521,NM_001035521;ensg_id=ENSG00000115207;gsymbol=GTF3C2;-:200:-	3.48609	-0.392298	2.57972e-09	2.0747e-08	2	0	4	7	7	10	32.9826	0	46.5929	277.557	233.863	323.311
chr4:88366273:88366473:chr4:88362981-88370405;refseq_id=NM_024047,NM_001248011,NM_198038;ensg_id=ENSG00000170502;gsymbol=NUDT9;+:200:+	3.4836	-0.392241	2.633e-08	1.77157e-07	1	2	3	6	13	5	16.4913	30.3435	34.9447	237.906	434.318	161.655
chr9:130257398:130257598:chr9:130255081-130258374;refseq_id=NM_001005373,NM_001190723,NM_138361,NM_001005374;ensg_id=ENSG00000148356;gsymbol=LRSAM1;+:200:+	3.47963	1.27719	8.06671e-24	3.09798e-22	10	3	10	29	24	33	164.913	45.5152	116.482	1149.88	801.817	1066.93
chrX:13678949:13679149:chrX:13677771-13682247;refseq_id=NM_152634;ensg_id=ENSG00000176896;gsymbol=TCEANC;+:200:+	3.47955	0.286301	4.2718e-09	3.29594e-08	0	8	3	14	7	21	0	121.374	34.9447	555.115	233.863	678.952
chr10:99197032:99197232:chr10:99195666-99198460;refseq_id=NA;ensg_id=NA;gsymbol=NA;-:200:-	3.47948	-0.0909217	5.61561e-10	5.03783e-09	1	4	3	13	7	11	16.4913	60.687	34.9447	515.464	233.863	355.642
chr9:15489438:15489638:chr9:15486825-15490122;refseq_id=NM_021144,NM_033222,NM_001128217;ensg_id=ENSG00000164985;gsymbol=PSIP1;-:200:-	3.46942	-0.583292	3.5717e-07	1.91349e-06	0	3	2	7	4	9	0	45.5152	23.2964	277.557	133.636	290.98
chr16:18797658:18797858:chr16:18796060-18799464;refseq_id=NM_001019,NM_001030009;ensg_id=ENSG00000134419;gsymbol=RPS15A;-:200:-	3.46791	1.20586	8.74527e-27	4.0947e-25	9	4	9	22	29	31	148.422	60.687	104.834	872.324	968.863	1002.26
chr12:56558152:56558352:chr12:56555636-56558515;refseq_id=NA;ensg_id=NA;gsymbol=NA;-:200:-	3.46709	0.739293	2.11223e-16	4.82982e-15	1	5	10	21	14	24	16.4913	75.8587	116.482	832.672	467.727	775.946
chr1:151341982:151342182:chr1:151341480-151342245;refseq_id=NM_003944,NM_001258288,NM_001258289;ensg_id=ENSG00000143416;gsymbol=SELENBP1;-:200:-	3.46166	-0.00705351	4.95714e-08	3.1032e-07	0	3	6	16	5	12	0	45.5152	69.8893	634.417	167.045	387.973
chr12:50538752:50538952:chr12:50537735-50561097;refseq_id=NA;ensg_id=ENSG00000139624;gsymbol=CERS5;-:200:-	3.45948	-0.582347	2.24158e-07	1.25396e-06	2	2	1	4	7	9	32.9826	30.3435	11.6482	158.604	233.863	290.98
chr17:80407832:80408032:chr17:80407046-80408707;refseq_id=NA;ensg_id=NA;gsymbol=NA;-:200:-	3.45898	0.486353	4.23526e-15	8.3196e-14	3	5	5	11	15	23	49.4739	75.8587	58.2411	436.162	501.136	743.615
chr2:130917207:130917407:chr2:130914824-130918845;refseq_id=NM_001171083,NM_017951,NR_033231,NM_017751,NR_033232;ensg_id=ENSG00000136699;gsymbol=SMPD4;-:200:-	3.45699	-0.247615	8.9852e-06	3.76827e-05	4	1	2	11	2	14	65.9652	15.1717	23.2964	436.162	66.8181	452.635
chr2:219081985:219082185:chr2:219081874-219090677;refseq_id=NM_152862;ensg_id=ENSG00000163466;gsymbol=ARPC2;+:200:+	3.45564	-0.251634	3.87929e-09	3.02726e-08	3	0	4	11	8	8	49.4739	0	46.5929	436.162	267.272	258.649
chr20:5092454:5092654:chr20:5089978-5093733;refseq_id=NM_014145,NM_001009925,NM_001009923;ensg_id=ENSG00000089063;gsymbol=TMEM230;-:200:-	3.45025	1.42919	8.44468e-25	3.39576e-23	9	6	11	30	25	40	148.422	91.0305	128.13	1189.53	835.227	1293.24
chr1:110027753:110027953:chr1:110026561-110028744;refseq_id=NM_153340;ensg_id=ENSG00000162650;gsymbol=ATXN7L2;+:200:+	3.45017	0.380631	2.6129e-12	3.55813e-11	3	6	3	15	10	20	49.4739	91.0305	34.9447	594.766	334.091	646.621
chr19:35996951:35997151:chr19:35996620-36001154;refseq_id=NM_001126056,NM_001190347,NM_033317,NM_001126059,NM_001035516,NM_001190348,NM_001126057,NM_001126058,NM_001190349;ensg_id=ENSG00000161249;gsymbol=DMKN;-:200:-	3.4455	-0.429398	3.72903e-08	2.39583e-07	0	2	4	10	5	8	0	30.3435	46.5929	396.511	167.045	258.649
chr17:8079344:8079517:chr17:8076297-8079714;refseq_id=NA;ensg_id=NA;gsymbol=NA;-:173:-	3.44222	-0.586872	6.55822e-06	2.82003e-05	2	0	3	1	11	8	32.9826	0	34.9447	39.6511	367.5	258.649
chr2:61147317:61147517:chr2:61147176-61147777;refseq_id=NM_002908;ensg_id=ENSG00000162924;gsymbol=REL;+:200:+	3.43985	-0.426288	4.57248e-07	2.42682e-06	0	4	2	11	7	5	0	60.687	23.2964	436.162	233.863	161.655
chr19:35998413:35998613:chr19:35997028-35999142;refseq_id=NM_001126056,NM_001190347,NM_033317,NM_001126059,NM_001035516,NM_001190348,NM_001126057,NM_001126058,NM_001190349;ensg_id=ENSG00000161249;gsymbol=DMKN;-:200:-	3.43814	0.898798	5.41342e-23	1.94769e-21	3	7	8	21	23	22	49.4739	106.202	93.1858	832.672	768.408	711.284
chr8:41467917:41468117:chr8:41467174-41468329;refseq_id=NM_178819;ensg_id=ENSG00000158669;gsymbol=AGPAT6;+:200:+	3.43723	-0.431353	1.90272e-08	1.31072e-07	0	1	5	9	6	8	0	15.1717	58.2411	356.86	200.454	258.649
chr19:17534106:17534306:chr19:17533141-17534608;refseq_id=NM_138401;ensg_id=ENSG00000141971;gsymbol=FAM125A;+:200:+	3.42926	-0.120408	1.34265e-05	5.45683e-05	2	4	2	11	1	18	32.9826	60.687	23.2964	436.162	33.4091	581.959
chr6:31696998:31697198:chr6:31696423-31698039;refseq_id=NM_013974;ensg_id=ENSG00000213722;gsymbol=DDAH2;-:200:-	3.42674	0.350378	2.50613e-14	4.3482e-13	4	0	8	15	12	17	65.9652	0	93.1858	594.766	400.909	549.628
chr6:31697002:31697202:chr6:31696423-31698039;refseq_id=NM_013974;ensg_id=ENSG00000213722;gsymbol=DDAH2;-:200:-	3.42674	0.350378	2.49951e-14	4.3482e-13	4	0	8	15	12	17	65.9652	0	93.1858	594.766	400.909	549.628
chr15:41582302:41582502:chr15:41578209-41591795;refseq_id=NR_026757;ensg_id=ENSG00000247556;gsymbol=OIP5-AS1;+:200:+	3.42449	-0.12192	2.85269e-10	2.7389e-09	3	2	3	12	8	10	49.4739	30.3435	34.9447	475.813	267.272	323.311
chr4:71894139:71894339:chr4:71892382-71896631;refseq_id=NM_000788;ensg_id=ENSG00000156136;gsymbol=DCK;+:200:+	3.42312	-0.425334	5.55727e-08	3.44732e-07	3	2	1	7	10	6	49.4739	30.3435	11.6482	277.557	334.091	193.986
chr16:28847569:28847769:chr16:28847254-28848558;refseq_id=NM_148414,NM_017492,NM_145714,NM_007245,NM_148416,NM_148415;ensg_id=ENSG00000168488;gsymbol=ATXN2L;+:200:+	3.42151	1.62856	2.48988e-21	8.02867e-20	13	7	10	32	26	50	214.387	106.202	116.482	1268.83	868.636	1616.55
chr7:99746921:99747121:chr7:99746530-99751140;refseq_id=NM_001008395;ensg_id=ENSG00000188186;gsymbol=LAMTOR4;+:200:+	3.41941	0.134911	1.81328e-12	2.52972e-11	5	2	3	12	10	15	82.4565	30.3435	34.9447	475.813	334.091	484.966
chr19:54609917:54610117:chr19:54609241-54612034;refseq_id=NA;ensg_id=ENSG00000170906;gsymbol=NDUFA3;+:200:+	3.41685	0.228756	2.05113e-12	2.83031e-11	1	2	8	13	10	17	16.4913	30.3435	93.1858	515.464	334.091	549.628
chr10:82114214:82114414:chr10:82112211-82116511;refseq_id=NA;ensg_id=ENSG00000170788;gsymbol=DYDC1;-:200:-	3.40879	-0.286874	3.22862e-08	2.11407e-07	2	1	4	9	5	12	32.9826	15.1717	46.5929	356.86	167.045	387.973
chr2:159389491:159389691:chr2:159313967-159433895;refseq_id=NM_001005476,NM_003628;ensg_id=ENSG00000144283;gsymbol=PKP4;+:200:+	3.40749	0.135181	7.5178e-09	5.58605e-08	3	5	2	10	7	20	49.4739	75.8587	23.2964	396.511	233.863	646.621
chr20:34324489:34324689:chr20:34322441-34326939;refseq_id=NM_184234,NM_004902,NM_001242600,NM_001242599,NR_040724,NR_040722;ensg_id=ENSG00000131051;gsymbol=RBM39;-:200:-	3.40188	3.08914	5.73861e-43	1.1538e-40	20	27	31	90	75	106	329.826	409.637	361.095	3568.6	2505.68	3427.09
chr5:176917594:176917794:chr5:176916394-176917907;refseq_id=NM_213636,NM_203352,NM_005451;ensg_id=ENSG00000196923;gsymbol=PDLIM7;-:200:-	3.4016	1.60472	5.03342e-30	3.07218e-28	13	6	11	36	34	36	214.387	91.0305	128.13	1427.44	1135.91	1163.92
chr20:62575269:62575469:chr20:62572463-62575811;refseq_id=NM_001193379,NM_017859;ensg_id=ENSG00000198276;gsymbol=UCKL1;-:200:-	3.40104	0.232447	1.26441e-14	2.29233e-13	4	2	5	10	14	16	65.9652	30.3435	58.2411	396.511	467.727	517.297
chr11:34073767:34073967:chr11:34073230-34093335;refseq_id=NM_005898;ensg_id=ENSG00000135387;gsymbol=CAPRIN1;+:200:+	3.39887	-0.00709056	8.71561e-12	1.08327e-10	2	3	4	9	15	9	32.9826	45.5152	46.5929	356.86	501.136	290.98
chr1:236899657:236899857:chr1:236898935-236900514;refseq_id=NM_001103;ensg_id=ENSG00000077522;gsymbol=ACTN2;+:200:+	3.39694	-0.287847	4.64019e-10	4.27498e-09	1	2	4	8	7	11	16.4913	30.3435	46.5929	317.209	233.863	355.642
chr1:86822285:86822485:chr1:86820457-86824574;refseq_id=NM_001184765,NM_001184766,NM_001007022,NM_020729;ensg_id=ENSG00000122417;gsymbol=ODF2L;-:200:-	3.39338	2.73021	3.88737e-57	4.42901e-54	15	14	34	68	72	78	247.37	212.404	396.04	2696.27	2405.45	2521.82
chr12:57625063:57625263:chr12:57624586-57625696;refseq_id=NM_005412,NM_001166356,NM_001166358,NM_001166359,NR_029417,NR_029416,NR_029415,NM_001166357,NR_048562;ensg_id=ENSG00000182199;gsymbol=SHMT2;+:200:+	3.38931	-0.624195	3.72631e-07	1.99008e-06	1	3	1	6	5	8	16.4913	45.5152	11.6482	237.906	167.045	258.649
chr17:80007882:80008082:chr17:80007553-80008431;refseq_id=NM_002917;ensg_id=ENSG00000169733;gsymbol=RFNG;-:200:-	3.38746	-0.284983	2.0435e-07	1.14691e-06	2	3	2	6	5	15	32.9826	45.5152	23.2964	237.906	167.045	484.966
chr17:5321461:5321661:chr17:5319833-5323059;refseq_id=NM_002532;ensg_id=ENSG00000108559;gsymbol=NUP88;-:200:-	3.38427	-0.0367771	7.29619e-09	5.45697e-08	3	0	6	13	6	13	49.4739	0	69.8893	515.464	200.454	420.304
chr14:69259787:69259987:chr14:69254372-69262960;refseq_id=NA;ensg_id=NA;gsymbol=NA;-:200:-	3.37587	-0.284228	2.88027e-08	1.9116e-07	4	2	1	4	12	10	65.9652	30.3435	11.6482	158.604	400.909	323.311
chr6:3076797:3076997:chr6:3064122-3078169;refseq_id=NA;ensg_id=NA;gsymbol=NA;+:200:+	3.37368	-0.466864	1.43787e-06	6.9026e-06	1	2	3	9	10	3	16.4913	30.3435	34.9447	356.86	334.091	96.9932
chr17:5321436:5321636:chr17:5319833-5323059;refseq_id=NM_002532;ensg_id=ENSG00000108559;gsymbol=NUP88;-:200:-	3.36578	-0.188405	5.17141e-07	2.73198e-06	3	0	5	13	4	11	49.4739	0	58.2411	515.464	133.636	355.642
chr17:27184756:27184956:chr17:27183523-27185225;refseq_id=NM_005702;ensg_id=ENSG00000132591;gsymbol=ERAL1;+:200:+	3.36339	1.80231	9.28228e-31	5.9862e-29	8	16	11	43	38	39	131.93	242.748	128.13	1705	1269.54	1260.91
chr7:107642829:107643029:chr7:107642003-107643416;refseq_id=NM_002291;ensg_id=ENSG00000091136;gsymbol=LAMB1;-:200:-	3.35916	0.298536	1.14178e-13	1.81516e-12	2	1	9	13	18	11	32.9826	15.1717	104.834	515.464	601.363	355.642
chr18:691276:691476:chr18:691068-693908;refseq_id=NM_202758,NM_017512,NM_001126123;ensg_id=ENSG00000132199;gsymbol=ENOSF1;-:200:-	3.35534	1.82081	4.95374e-33	3.76264e-31	5	12	19	38	37	47	82.4565	182.061	221.316	1506.74	1236.14	1519.56
chr19:4179283:4179483:chr19:4177076-4180906;refseq_id=NM_016539,NM_001193285;ensg_id=ENSG00000077463;gsymbol=SIRT6;-:200:-	3.35311	-0.465375	3.2068e-07	1.72612e-06	1	4	1	4	8	10	16.4913	60.687	11.6482	158.604	267.272	323.311
chr10:27470208:27470408:chr10:27462050-27475848;refseq_id=NM_032844,NM_001172303,NM_001172304;ensg_id=ENSG00000120539;gsymbol=MASTL;+:200:+	3.35155	0.305518	9.70051e-15	1.79224e-13	3	4	5	15	14	13	49.4739	60.687	58.2411	594.766	467.727	420.304
chr17:73221592:73221792:chr17:73221437-73222252;refseq_id=NM_024844;ensg_id=ENSG00000125450;gsymbol=NUP85;+:200:+	3.35153	0.303568	1.84476e-14	3.28405e-13	4	2	6	12	13	17	65.9652	30.3435	69.8893	475.813	434.318	549.628
chr1:38047146:38047346:chr1:38042029-38047937;refseq_id=NM_013285;ensg_id=ENSG00000134697;gsymbol=GNL2;-:200:-	3.34233	-0.320722	1.78174e-08	1.24323e-07	2	2	3	9	6	10	32.9826	30.3435	34.9447	356.86	200.454	323.311
chr2:242033847:242034047:chr2:242029693-242039309;refseq_id=NM_182501;ensg_id=ENSG00000122085;gsymbol=MTERFD2;-:200:-	3.33756	2.01761	3.13944e-38	4.47108e-36	11	14	16	40	44	54	181.404	212.404	186.372	1586.04	1470	1745.88
chr12:49524185:49524385:chr12:49523283-49525178;refseq_id=NM_006082;ensg_id=ENSG00000123416;gsymbol=TUBA1B;-:200:-	3.33105	-0.318142	3.7181e-08	2.39583e-07	4	2	1	6	7	12	65.9652	30.3435	11.6482	237.906	233.863	387.973
chr17:5390676:5390876:chr17:5389694-5391909;refseq_id=NA;ensg_id=ENSG00000167842;gsymbol=MIS12;+:200:+	3.32751	1.08884	1.95709e-19	5.39462e-18	8	6	8	28	19	27	131.93	91.0305	93.1858	1110.23	634.772	872.939
chr3:9845019:9845219:chr3:9843345-9845697;refseq_id=NM_001024960,NM_001024959,NM_005718,NM_001198780;ensg_id=ENSG00000241553,ENSG00000250151;gsymbol=ARPC4,ARPC4-TTLL3;+:200:+	3.32549	2.50722	6.70935e-26	2.97826e-24	18	14	25	65	43	79	296.844	212.404	291.206	2577.32	1436.59	2554.15
chr11:67374569:67374769:chr11:67374429-67375949;refseq_id=NM_001166102,NM_007103;ensg_id=ENSG00000167792;gsymbol=NDUFV1;+:200:+	3.32298	0.182393	3.88109e-12	5.08259e-11	3	5	3	8	13	17	49.4739	75.8587	34.9447	317.209	434.318	549.628
chr14:68159769:68159969:chr14:68159155-68162510;refseq_id=NM_016026,NM_001252650;ensg_id=ENSG00000072042;gsymbol=RDH11;-:200:-	3.32082	-0.185123	1.47591e-09	1.2304e-08	5	1	2	10	11	7	82.4565	15.1717	23.2964	396.511	367.5	226.317
chr1:33097480:33097680:chr1:33093109-33099328;refseq_id=NM_178547;ensg_id=ENSG00000176261;gsymbol=ZBTB8OS;-:200:-	3.31899	2.02962	6.70986e-22	2.24846e-20	11	7	25	54	33	51	181.404	106.202	291.206	2141.16	1102.5	1648.88
chr7:99048124:99048324:chr7:99047899-99050063;refseq_id=NM_001081559,NM_006693;ensg_id=ENSG00000160917;gsymbol=CPSF4;+:200:+	3.31895	-0.188353	2.06302e-06	9.68601e-06	2	3	3	6	4	18	32.9826	45.5152	34.9447	237.906	133.636	581.959
chr1:44063218:44063418:chr1:44058128-44064584;refseq_id=NM_002840,NM_130440;ensg_id=ENSG00000142949;gsymbol=PTPRF;+:200:+	3.31797	-0.670626	1.09798e-06	5.4548e-06	1	1	3	6	4	8	16.4913	15.1717	34.9447	237.906	133.636	258.649
chr5:176918977:176919177:chr5:176918405-176919436;refseq_id=NM_213636,NM_203352,NM_005451;ensg_id=ENSG00000196923;gsymbol=PDLIM7;-:200:-	3.31512	-0.19171	1.63497e-06	7.81585e-06	1	3	4	3	8	17	16.4913	45.5152	46.5929	118.953	267.272	549.628
chr19:46886467:46886667:chr19:46879710-46887135;refseq_id=NM_006247,NM_001204284;ensg_id=ENSG00000011485;gsymbol=PPP5C;+:200:+	3.31275	0.180528	3.14739e-09	2.49023e-08	3	4	4	6	11	21	49.4739	60.687	46.5929	237.906	367.5	678.952
chr14:21905124:21905324:chr14:21899970-21905457;refseq_id=NA;ensg_id=ENSG00000100888;gsymbol=CHD8;-:200:-	3.3106	-0.0661649	1.16212e-10	1.21844e-09	2	3	4	9	8	14	32.9826	45.5152	46.5929	356.86	267.272	452.635
chr7:23570889:23571089:chr7:23561326-23571656;refseq_id=NM_013293;ensg_id=ENSG00000164548;gsymbol=TRA2A;-:200:-	3.30788	0.370734	2.67664e-15	5.38163e-14	4	2	7	13	17	14	65.9652	30.3435	81.5376	515.464	567.954	452.635
chrX:53247894:53248094:chrX:53247458-53250098;refseq_id=NM_004187,NM_001146702;ensg_id=ENSG00000126012;gsymbol=KDM5C;-:200:-	3.30125	-0.670523	2.6789e-06	1.23403e-05	2	1	2	2	8	8	32.9826	15.1717	23.2964	79.3021	267.272	258.649
chr7:102006220:102006420:chr7:102004308-102016396;refseq_id=NA;ensg_id=NA;gsymbol=NA;+:200:+	3.30107	-0.506392	4.60509e-07	2.44034e-06	0	3	3	8	5	8	0	45.5152	34.9447	317.209	167.045	258.649
chr3:184034908:184035108:chr3:184033920-184035604;refseq_id=NM_198242,NM_001194946,NM_001194947,NM_198241,NM_198244,NM_182917;ensg_id=ENSG00000114867,ENSG00000145191;gsymbol=EIF4G1,EIF2B5;+:200:+	3.29599	0.54136	1.72356e-11	2.02444e-10	5	2	8	10	13	27	82.4565	30.3435	93.1858	396.511	434.318	872.939
chr15:42966824:42967024:chr15:42966638-42967944;refseq_id=NM_020759;ensg_id=ENSG00000159433;gsymbol=STARD9;+:200:+	3.29162	-0.502814	1.30122e-06	6.37186e-06	2	3	1	7	4	10	32.9826	45.5152	11.6482	277.557	133.636	323.311
chr16:69269450:69269650:chr16:69221050-69279718;refseq_id=NM_006750;ensg_id=ENSG00000168807;gsymbol=SNTB2;+:200:+	3.28793	0.0522388	2.55832e-10	2.48419e-09	3	6	1	10	16	8	49.4739	91.0305	11.6482	396.511	534.545	258.649
chr10:99236676:99236876:chr10:99236440-99237173;refseq_id=NM_022362;ensg_id=ENSG00000155229;gsymbol=MMS19;-:200:-	3.28706	1.04753	7.62039e-21	2.36786e-19	4	6	12	19	22	31	65.9652	91.0305	139.779	753.37	734.999	1002.26
chr15:66643938:66644138:chr15:66641653-66644545;refseq_id=NM_017858;ensg_id=ENSG00000075131;gsymbol=TIPIN;-:200:-	3.2866	-0.36038	2.79213e-08	1.86033e-07	1	1	5	9	9	6	16.4913	15.1717	58.2411	356.86	300.682	193.986
chr7:150729730:150729930:chr7:150728328-150731004;refseq_id=NM_007188;ensg_id=ENSG00000197150;gsymbol=ABCB8;+:200:+	3.28555	-0.503526	0.00031695	0.000991157	4	0	2	6	1	14	65.9652	0	23.2964	237.906	33.4091	452.635
chr12:53690037:53690237:chr12:53689235-53691708;refseq_id=NM_002624,NM_145897;ensg_id=ENSG00000123349;gsymbol=PFDN5;+:200:+	3.28491	0.7044	3.87823e-16	8.49731e-15	7	4	6	22	19	15	115.439	60.687	69.8893	872.324	634.772	484.966
chr11:61188602:61188802:chr11:61187942-61189080;refseq_id=NM_001136040,NM_001142565,NM_024811;ensg_id=ENSG00000149532;gsymbol=CPSF7;-:200:-	3.28176	0.627008	5.00534e-15	9.72059e-14	7	4	5	14	15	24	115.439	60.687	58.2411	555.115	501.136	775.946
chr11:61188599:61188799:chr11:61187942-61189080;refseq_id=NM_001136040,NM_001142565,NM_024811;ensg_id=ENSG00000149532;gsymbol=CPSF7;-:200:-	3.28175	0.627008	5.0375e-15	9.72778e-14	7	4	5	14	15	24	115.439	60.687	58.2411	555.115	501.136	775.946
chr20:34308524:34308724:chr20:34304662-34309799;refseq_id=NM_184234,NM_004902,NM_001242600,NM_001242599,NR_040724,NR_040722;ensg_id=ENSG00000131051;gsymbol=RBM39;-:200:-	3.28142	0.257245	6.65669e-14	1.09387e-12	4	4	4	14	14	12	65.9652	60.687	46.5929	555.115	467.727	387.973
chr1:156307031:156307231:chr1:156305618-156308206;refseq_id=NM_005998,NR_036565,NM_001008800;ensg_id=ENSG00000163468;gsymbol=CCT3;-:200:-	3.27915	1.9561	1.73338e-36	2.11596e-34	9	11	21	40	42	50	148.422	166.889	244.613	1586.04	1403.18	1616.55
chr19:53120068:53120268:chr19:53115618-53122315;refseq_id=NA;ensg_id=ENSG00000167766;gsymbol=ZNF83;-:200:-	3.27374	1.16313	3.5025e-22	1.19716e-20	5	7	12	17	31	30	82.4565	106.202	139.779	674.068	1035.68	969.932
chr17:25631605:25631805:chr17:25621106-25633908;refseq_id=NM_015626,NM_134265;ensg_id=ENSG00000109046;gsymbol=WSB1;+:200:+	3.27223	0.230067	1.99432e-09	1.623e-08	3	3	6	15	6	18	49.4739	45.5152	69.8893	594.766	200.454	581.959
chr17:73204398:73204598:chr17:73201815-73206080;refseq_id=NM_024844;ensg_id=ENSG00000125450;gsymbol=NUP85;+:200:+	3.26843	0.91249	8.31911e-21	2.56169e-19	5	9	6	20	22	23	82.4565	136.546	69.8893	793.021	734.999	743.615
chr19:51305871:51306071:chr19:51305474-51307974;refseq_id=NM_199250,NM_199249;ensg_id=ENSG00000167747;gsymbol=C19orf48;-:200:-	3.26393	0.100334	3.72805e-08	2.39583e-07	3	1	7	18	7	10	49.4739	15.1717	81.5376	713.719	233.863	323.311
chr16:28847497:28847646:chr16:28847254-28848558;refseq_id=NM_148414,NM_017492,NM_145714,NM_007245,NM_148416,NM_148415;ensg_id=ENSG00000168488;gsymbol=ATXN2L;+:149:+	3.25207	0.498674	2.45308e-12	3.35385e-11	4	2	9	15	11	22	65.9652	30.3435	104.834	594.766	367.5	711.284
chr1:19476289:19476489:chr1:19475057-19477287;refseq_id=NM_020765;ensg_id=ENSG00000127481;gsymbol=UBR4;-:200:-	3.24196	0.49354	1.32211e-14	2.3784e-13	3	1	11	11	17	20	49.4739	15.1717	128.13	436.162	567.954	646.621
chr14:73604614:73604814:chr14:73603144-73614584;refseq_id=NA;ensg_id=ENSG00000080815;gsymbol=PSEN1;+:200:+	3.24154	-0.715197	3.70518e-06	1.65547e-05	1	1	3	6	3	8	16.4913	15.1717	34.9447	237.906	100.227	258.649
chr14:73604619:73604819:chr14:73603143-73614584;refseq_id=NA;ensg_id=ENSG00000080815;gsymbol=PSEN1;+:200:+	3.24152	-0.715197	3.69564e-06	1.65336e-05	1	1	3	6	3	8	16.4913	15.1717	34.9447	237.906	100.227	258.649
chr16:89902422:89902622:chr16:89894907-89911773;refseq_id=NM_032451;ensg_id=ENSG00000204991;gsymbol=SPIRE2;+:200:+	3.23514	-0.713259	3.54718e-06	1.5932e-05	2	1	2	6	3	8	32.9826	15.1717	23.2964	237.906	100.227	258.649
chr11:47256223:47256307:chr11:47256124-47256963;refseq_id=NM_000107;ensg_id=ENSG00000134574;gsymbol=DDB2;+:84:+	3.22118	-0.394869	1.48524e-07	8.63362e-07	1	3	3	6	6	11	16.4913	45.5152	34.9447	237.906	200.454	355.642
chr22:21341592:21341792:chr22:21340130-21342407;refseq_id=NM_006767;ensg_id=ENSG00000099949;gsymbol=LZTR1;+:200:+	3.21998	-0.394022	3.74839e-08	2.39925e-07	4	0	3	6	9	8	65.9652	0	34.9447	237.906	300.682	258.649
chr11:67947004:67947204:chr11:67942485-67947667;refseq_id=NM_017635,NM_016028;ensg_id=ENSG00000110066;gsymbol=SUV420H1;-:200:-	3.21619	-0.257656	3.90882e-09	3.04336e-08	2	2	4	6	12	8	32.9826	30.3435	46.5929	237.906	400.909	258.649
chr14:105911848:105912003:chr14:105911755-105915746;refseq_id=NM_004689,NM_001203258;ensg_id=ENSG00000226174,ENSG00000182979;gsymbol=TEX22,MTA1;+:155:+	3.2135	-0.127795	2.22406e-10	2.19073e-09	3	3	3	6	11	12	49.4739	45.5152	34.9447	237.906	367.5	387.973
chr10:46135869:46136069:chr10:46135264-46143982;refseq_id=NM_001128324,NM_174890;ensg_id=ENSG00000172671;gsymbol=ZFAND4;-:200:-	3.20806	0.0990885	1.74394e-08	1.22398e-07	3	3	5	7	8	20	49.4739	45.5152	58.2411	277.557	267.272	646.621
chr18:21047162:21047362:chr18:21046097-21053590;refseq_id=NM_003831;ensg_id=ENSG00000101782;gsymbol=RIOK3;+:200:+	3.20766	0.29777	1.12252e-13	1.79289e-12	3	3	7	10	13	18	49.4739	45.5152	81.5376	396.511	434.318	581.959
chr5:176918996:176919196:chr5:176918405-176919436;refseq_id=NM_213636,NM_203352,NM_005451;ensg_id=ENSG00000196923;gsymbol=PDLIM7;-:200:-	3.2061	-0.258875	1.06077e-05	4.38532e-05	1	3	4	2	7	17	16.4913	45.5152	46.5929	79.3021	233.863	549.628
chr19:54656736:54656917:chr19:54656604-54657577;refseq_id=NM_014516;ensg_id=ENSG00000088038;gsymbol=CNOT3;+:181:+	3.20598	-0.388818	8.91655e-07	4.51508e-06	5	2	0	6	6	11	82.4565	30.3435	0	237.906	200.454	355.642
chr1:35558794:35558994:chr1:35544972-35559684;refseq_id=NM_024772;ensg_id=ENSG00000197056;gsymbol=ZMYM1;+:200:+	3.18198	0.367115	6.39692e-13	9.54789e-12	3	3	8	15	11	17	49.4739	45.5152	93.1858	594.766	367.5	549.628
chr12:50135551:50135739:chr12:50135391-50146332;refseq_id=NM_003217;ensg_id=ENSG00000139644;gsymbol=TMBIM6;+:188:+	3.18145	0.179099	1.69554e-10	1.72481e-09	2	5	5	16	10	11	32.9826	75.8587	58.2411	634.417	334.091	355.642
chr12:50135539:50135739:chr12:50135340-50146332;refseq_id=NM_003217;ensg_id=ENSG00000139644;gsymbol=TMBIM6;+:200:+	3.18145	0.179099	1.69411e-10	1.72481e-09	2	5	5	16	10	11	32.9826	75.8587	58.2411	634.417	334.091	355.642
chr20:33331145:33331345:chr20:33326702-33334732;refseq_id=NM_014071,NM_001242539;ensg_id=ENSG00000198646;gsymbol=NCOA6;-:200:-	3.17443	0.534435	1.41626e-16	3.29305e-15	2	3	11	15	17	17	32.9826	45.5152	128.13	594.766	567.954	549.628
chr17:46651376:46651576:chr17:46632893-46667631;refseq_id=NA;ensg_id=ENSG00000120093;gsymbol=HOXB3;-:200:-	3.17285	2.90992	4.97827e-54	2.43082e-51	24	19	37	70	77	91	395.791	288.263	430.984	2775.57	2572.5	2942.13
chr7:115891613:115891813:chr7:115890215-115892530;refseq_id=NM_015641,NM_152829;ensg_id=ENSG00000135269;gsymbol=TES;+:200:+	3.17218	-0.0360068	4.93332e-09	3.78074e-08	3	4	3	14	10	7	49.4739	60.687	34.9447	555.115	334.091	226.317
chr16:3788673:3788873:chr16:3786651-3789725;refseq_id=NM_004380,NM_001079846;ensg_id=ENSG00000005339;gsymbol=CREBBP;-:200:-	3.171	-0.432551	1.83309e-06	8.69002e-06	3	0	4	9	10	3	49.4739	0	46.5929	356.86	334.091	96.9932
chr3:139098749:139098949:chr3:139098222-139102277;refseq_id=NM_004766;ensg_id=ENSG00000184432;gsymbol=COPB2;-:200:-	3.1693	-0.286943	7.13293e-07	3.67728e-06	5	0	3	11	5	9	82.4565	0	34.9447	436.162	167.045	290.98
chr19:57905355:57905555:chr19:57901218-57908542;refseq_id=NM_001172773,NM_152909;ensg_id=ENSG00000188785,ENSG00000268133;gsymbol=ZNF548,AC003002.4;+:200:+	3.16523	-0.586693	1.14996e-05	4.72992e-05	3	0	3	9	7	3	49.4739	0	34.9447	356.86	233.863	96.9932
chr10:35300892:35301092:chr10:35297479-35302728;refseq_id=NM_001198777,NM_001198778,NM_001198779,NM_003591;ensg_id=ENSG00000108094;gsymbol=CUL2;-:200:-	3.16396	-0.157301	6.30272e-09	4.75556e-08	4	2	3	11	9	8	65.9652	30.3435	34.9447	436.162	300.682	258.649
chr8:144676241:144676441:chr8:144668899-144679845;refseq_id=NM_001130055,NM_001960,NM_001195203,NM_001130056,NM_001130053,NM_032378;ensg_id=ENSG00000104529;gsymbol=EEF1D;-:200:-	3.16224	-0.588079	9.86317e-06	4.10126e-05	1	2	3	6	3	10	16.4913	30.3435	34.9447	237.906	100.227	323.311
chr20:3782168:3782368:chr20:3781901-3782747;refseq_id=NM_021873,NM_004358,NM_021872;ensg_id=ENSG00000101224;gsymbol=CDC25B;+:200:+	3.16044	-0.587677	9.96699e-06	4.13437e-05	2	1	3	6	3	10	32.9826	15.1717	34.9447	237.906	100.227	323.311
chr17:78188937:78189137:chr17:78187971-78190991;refseq_id=NM_000199;ensg_id=ENSG00000181523;gsymbol=SGSH;-:200:-	3.15751	-0.286457	1.13564e-07	6.64662e-07	2	5	1	9	10	6	32.9826	75.8587	11.6482	356.86	334.091	193.986
chr16:712472:712672:chr16:712220-715801;refseq_id=NM_145294;ensg_id=ENSG00000161996;gsymbol=WDR90;+:200:+	3.14993	-0.328032	5.35892e-07	2.81797e-06	1	1	6	11	4	9	16.4913	15.1717	69.8893	436.162	133.636	290.98
chr16:712478:712678:chr16:712220-715801;refseq_id=NM_145294;ensg_id=ENSG00000161996;gsymbol=WDR90;+:200:+	3.14989	-0.328032	5.3369e-07	2.81071e-06	1	1	6	11	4	9	16.4913	15.1717	69.8893	436.162	133.636	290.98
chr1:150814944:150815144:chr1:150811917-150818783;refseq_id=NM_001197325,NM_001668,NM_178427;ensg_id=ENSG00000143437;gsymbol=ARNT;-:200:-	3.14204	1.12142	2.12706e-20	6.37743e-19	9	6	10	25	29	20	148.422	91.0305	116.482	991.277	968.863	646.621
chr11:124746980:124747180:chr11:124746738-124747554;refseq_id=NM_022370;ensg_id=ENSG00000154134;gsymbol=ROBO3;+:200:+	3.14093	-0.586847	7.28224e-06	3.10745e-05	4	0	2	3	7	9	65.9652	0	23.2964	118.953	233.863	290.98
chr19:40742292:40742492:chr19:40741797-40743998;refseq_id=NM_001243028,NM_001626,NM_001243027;ensg_id=ENSG00000105221;gsymbol=AKT2;-:200:-	3.13831	0.435161	8.97176e-12	1.11107e-10	6	3	6	11	12	22	98.9479	45.5152	69.8893	436.162	400.909	711.284
chr1:148556491:148556691:chr1:148555979-148558287;refseq_id=NA;ensg_id=ENSG00000243452;gsymbol=NBPF15;+:200:+	3.13056	0.251701	1.67585e-11	1.98203e-10	6	2	5	9	12	18	98.9479	30.3435	58.2411	356.86	400.909	581.959
chr18:9593872:9594072:chr18:9588709-9595100;refseq_id=NR_052003,NM_005134,NM_001042388;ensg_id=ENSG00000154845;gsymbol=PPP4R1;-:200:-	3.13	0.941346	4.80253e-17	1.16419e-15	8	8	6	19	18	28	131.93	121.374	69.8893	753.37	601.363	905.27
chr1:24105727:24105927:chr1:24104876-24106431;refseq_id=NA;ensg_id=NA;gsymbol=NA;+:200:+	3.11871	-0.0703763	4.78226e-10	4.38224e-09	2	4	4	8	12	10	32.9826	60.687	46.5929	317.209	400.909	323.311
chr11:116746725:116746925:chr11:116746090-116747079;refseq_id=NM_025164;ensg_id=ENSG00000160584;gsymbol=SIK3;-:200:-	3.116	0.922993	7.03029e-18	1.76688e-16	6	8	8	24	19	21	98.9479	121.374	93.1858	951.626	634.772	678.952
chr2:55800913:55801113:chr2:55795330-55804492;refseq_id=NM_001122964,NM_020463;ensg_id=ENSG00000138041;gsymbol=SMEK2;-:200:-	3.10951	1.43658	5.67389e-23	2.02014e-21	7	7	18	20	34	38	115.439	106.202	209.668	793.021	1135.91	1228.58
chr12:21654149:21654349:chr12:21652489-21654603;refseq_id=NA;ensg_id=ENSG00000004700;gsymbol=RECQL;-:200:-	3.10704	-0.192016	1.80672e-08	1.255e-07	4	2	3	6	13	8	65.9652	30.3435	34.9447	237.906	434.318	258.649
chr12:21654149:21654346:chr12:21652489-21654603;refseq_id=NA;ensg_id=ENSG00000004700;gsymbol=RECQL;-:197:-	3.10704	-0.192016	1.80737e-08	1.255e-07	4	2	3	6	13	8	65.9652	30.3435	34.9447	237.906	434.318	258.649
chr3:181432772:181432972:chr3:181417386-181459005;refseq_id=NR_075091,NR_103443,NR_004053,NM_006354,NR_046734;ensg_id=ENSG00000242808;gsymbol=SOX2-OT;+:200:+	3.0943	-0.46951	1.17847e-06	5.84618e-06	3	1	3	7	4	10	49.4739	15.1717	34.9447	277.557	133.636	323.311
chr19:45571477:45571677:chr19:45571273-45572382;refseq_id=NM_007056;ensg_id=ENSG00000104859;gsymbol=CLASRP;+:200:+	3.09068	-0.46997	5.19484e-07	2.74012e-06	3	1	3	6	5	10	49.4739	15.1717	34.9447	237.906	167.045	323.311
chr16:68355128:68355328:chr16:68349800-68358735;refseq_id=NM_001184824,NM_019023;ensg_id=ENSG00000132600;gsymbol=PRMT7;+:200:+	3.08003	0.477336	7.35421e-13	1.08817e-11	4	7	5	12	13	21	65.9652	106.202	58.2411	475.813	434.318	678.952
chr3:53052244:53052444:chr3:53003117-53077270;refseq_id=NM_016329;ensg_id=ENSG00000163935;gsymbol=SFMBT1;-:200:-	3.07633	-0.633858	7.66499e-06	3.26263e-05	0	2	4	3	7	8	0	30.3435	46.5929	118.953	233.863	258.649
chr11:124746962:124747162:chr11:124746738-124747554;refseq_id=NM_022370;ensg_id=ENSG00000154134;gsymbol=ROBO3;+:200:+	3.06621	-0.629212	9.05871e-06	3.79444e-05	4	0	2	3	7	8	65.9652	0	23.2964	118.953	233.863	258.649
chr7:102006201:102006401:chr7:102004308-102016396;refseq_id=NA;ensg_id=NA;gsymbol=NA;+:200:+	3.06196	-0.227138	2.74713e-08	1.84111e-07	1	3	5	10	7	9	16.4913	45.5152	58.2411	396.511	233.863	290.98
chr19:40317627:40317827:chr19:40317312-40318065;refseq_id=NM_006484,NM_004714,NM_006483;ensg_id=ENSG00000105204;gsymbol=DYRK1B;-:200:-	3.05701	0.453591	7.65067e-11	8.14641e-10	5	4	7	13	10	22	82.4565	60.687	81.5376	515.464	334.091	711.284
chr5:145519266:145519466:chr5:145515164-145519824;refseq_id=NM_020117;ensg_id=ENSG00000133706;gsymbol=LARS;-:200:-	3.05364	-0.221541	1.09494e-07	6.41937e-07	1	7	1	10	9	7	16.4913	106.202	11.6482	396.511	300.682	226.317
chr16:89755459:89755659:chr16:89753359-89757032;refseq_id=NM_052987,NM_001160367,NM_001098533,NM_052988;ensg_id=ENSG00000185324;gsymbol=CDK10;+:200:+	3.0482	0.0966253	7.36594e-11	7.86775e-10	5	1	6	12	10	12	82.4565	15.1717	69.8893	475.813	334.091	387.973
chr3:132415657:132415857:chr3:132413671-132416206;refseq_id=NM_153240;ensg_id=ENSG00000113971;gsymbol=NPHP3;-:200:-	3.04086	-0.362922	3.74839e-08	2.39925e-07	3	1	4	5	9	9	49.4739	15.1717	46.5929	198.255	300.682	290.98
chr20:2816960:2817160:chr20:2815960-2819124;refseq_id=NM_001271168,NM_022760;ensg_id=ENSG00000132635;gsymbol=PCED1A;-:200:-	3.04065	0.36382	4.78892e-12	6.1768e-11	3	6	6	9	15	18	49.4739	91.0305	69.8893	356.86	501.136	581.959
chr17:44116581:44116781:chr17:44115904-44117250;refseq_id=NM_015443,NM_001193465,NM_001193466;ensg_id=ENSG00000120071;gsymbol=KANSL1;-:200:-	3.03877	0.980548	4.1433e-18	1.05685e-16	8	5	11	23	19	24	131.93	75.8587	128.13	911.975	634.772	775.946
chr16:685063:685263:chr16:684719-685340;refseq_id=NM_001040161,NM_032366,NM_001040160,NM_001040165,NM_001040162;ensg_id=ENSG00000130731;gsymbol=C16orf13;-:200:-	3.03174	0.432313	1.26728e-10	1.31658e-09	5	4	7	16	9	19	82.4565	60.687	81.5376	634.417	300.682	614.29
chr22:30366764:30366964:chr22:30353025-30374520;refseq_id=NM_153050,NM_021090,NM_153051;ensg_id=ENSG00000100330;gsymbol=MTMR3;+:200:+	3.02772	0.851361	2.52244e-15	5.10161e-14	8	4	10	23	17	20	131.93	60.687	116.482	911.975	567.954	646.621
chr12:53690013:53690213:chr12:53689623-53691708;refseq_id=NM_002624,NM_145897;ensg_id=ENSG00000123349;gsymbol=PFDN5;+:200:+	3.02416	0.852336	1.46579e-16	3.38519e-15	8	5	9	23	19	18	131.93	75.8587	104.834	911.975	634.772	581.959
chr15:58350306:58350506:chr15:58306375-58358121;refseq_id=NM_170697,NM_003888,NM_001206897,NM_170696;ensg_id=ENSG00000128918;gsymbol=ALDH1A2;-:200:-	3.02392	0.733143	3.61965e-15	7.15142e-14	9	6	5	16	16	23	148.422	91.0305	58.2411	634.417	534.545	743.615
chr12:50143200:50143400:chr12:50135740-50146332;refseq_id=NM_003217,NM_001098576;ensg_id=ENSG00000139644;gsymbol=TMBIM6;+:200:+	3.02227	-0.507009	1.37376e-06	6.66e-06	3	2	2	8	4	8	49.4739	30.3435	23.2964	317.209	133.636	258.649
chr17:4618338:4618494:chr17:4618308-4619328;refseq_id=NM_001257330,NM_001257328,NM_004313,NR_049852,NM_001257331,NM_199004;ensg_id=ENSG00000141480;gsymbol=ARRB2;+:156:+	3.01971	-0.135972	1.46905e-08	1.05046e-07	3	1	6	5	12	11	49.4739	15.1717	69.8893	198.255	400.909	355.642
chr22:41195675:41195875:chr22:41195027-41215392;refseq_id=NA;ensg_id=ENSG00000100372;gsymbol=SLC25A17;-:200:-	3.01185	1.4174	7.65689e-24	2.97401e-22	11	10	12	24	29	36	181.404	151.717	139.779	951.626	968.863	1163.92
chr12:56694004:56694204:chr12:56680379-56708750;refseq_id=NA;ensg_id=ENSG00000144785;gsymbol=CNPY2;-:200:-	3.01125	0.432676	3.05751e-11	3.47195e-10	6	5	5	10	13	21	98.9479	75.8587	58.2411	396.511	434.318	678.952
chr1:150464686:150464886:chr1:150463870-150470223;refseq_id=NM_025150,NR_073514,NM_001271895,NM_001271896,NM_001256402;ensg_id=ENSG00000143374;gsymbol=TARS2;+:200:+	3.00682	-0.256775	1.92787e-07	1.08917e-06	3	3	3	11	6	8	49.4739	45.5152	34.9447	436.162	200.454	258.649
chr10:103344676:103344876:chr10:103343265-103345913;refseq_id=NM_013274,NM_001174085,NM_001174084;ensg_id=ENSG00000166169;gsymbol=POLL;-:200:-	3.00537	0.0677258	3.86478e-11	4.33109e-10	3	3	6	11	10	12	49.4739	45.5152	69.8893	436.162	334.091	387.973
chrX:47057507:47057707:chrX:47053201-47058318;refseq_id=NM_153280;ensg_id=ENSG00000130985;gsymbol=UBA1;+:200:+	3.00401	0.704418	7.25816e-14	1.187e-12	4	6	10	12	17	25	65.9652	91.0305	116.482	475.813	567.954	808.277
chr10:99502650:99502850:chr10:99498234-99504672;refseq_id=NM_001174121,NM_001174122,NM_001174120,NM_001174119,NM_144588,NM_001002262,NM_001002261;ensg_id=ENSG00000155256;gsymbol=ZFYVE27;+:200:+	3.00091	-0.260834	3.6933e-08	2.38633e-07	2	3	4	6	10	9	32.9826	45.5152	46.5929	237.906	334.091	290.98
chr18:9583273:9583473:chr18:9577062-9584578;refseq_id=NR_052003,NM_005134,NM_001042388;ensg_id=ENSG00000154845;gsymbol=PPP4R1;-:200:-	3.00034	-0.261298	5.01958e-08	3.13655e-07	2	3	4	5	11	9	32.9826	45.5152	46.5929	198.255	367.5	290.98
chr3:49048362:49048562:chr3:49044637-49050347;refseq_id=NM_018031;ensg_id=ENSG00000178252;gsymbol=WDR6;+:200:+	2.99512	0.248787	1.8024e-09	1.49167e-08	4	5	5	11	8	19	65.9652	75.8587	58.2411	436.162	267.272	614.29
chr16:842023:842223:chr16:841161-842590;refseq_id=NM_022092;ensg_id=ENSG00000127586;gsymbol=CHTF18;+:200:+	2.99331	-0.399432	1.38914e-05	5.61902e-05	1	3	4	6	3	13	16.4913	45.5152	46.5929	237.906	100.227	420.304
chr15:91303176:91303376:chr15:91298041-91304485;refseq_id=NM_000057;ensg_id=ENSG00000197299;gsymbol=BLM;+:200:+	2.98747	2.03244	1.37534e-28	7.34519e-27	11	16	24	47	39	47	181.404	242.748	279.557	1863.6	1302.95	1519.56
chr7:128851023:128851223:chr7:128850806-128851611;refseq_id=NM_005631;ensg_id=ENSG00000128602;gsymbol=SMO;+:200:+	2.98499	-0.167614	5.65551e-08	3.49558e-07	2	1	7	9	6	12	32.9826	15.1717	81.5376	356.86	200.454	387.973
chr11:124496388:124496588:chr11:124495567-124496946;refseq_id=NM_032811,NR_016021;ensg_id=ENSG00000154144;gsymbol=TBRG1;+:200:+	2.98133	-0.0355156	4.61998e-08	2.91887e-07	6	5	0	9	8	13	98.9479	75.8587	0	356.86	267.272	420.304
chr2:177134743:177134943:chr2:177134123-177161635;refseq_id=NM_006554;ensg_id=ENSG00000128654;gsymbol=MTX2;+:200:+	2.97896	-0.400393	9.5661e-08	5.69633e-07	2	1	5	8	8	6	32.9826	15.1717	58.2411	317.209	267.272	193.986
chr8:11679058:11679258:chr8:11667176-11683724;refseq_id=NM_004462;ensg_id=ENSG00000079459;gsymbol=FDFT1;+:200:+	2.97445	-0.0802154	1.66403e-07	9.54304e-07	1	1	9	11	12	6	16.4913	15.1717	104.834	436.162	400.909	193.986
chr6:26462824:26463024:chr6:26459709-26463753;refseq_id=NM_007049,NM_001197233,NM_078476,NM_001197234;ensg_id=ENSG00000112763;gsymbol=BTN2A1;+:200:+	2.96696	-0.16596	7.59352e-08	4.58563e-07	3	2	5	7	14	6	49.4739	30.3435	58.2411	277.557	467.727	193.986
chr19:34717112:34717312:chr19:34712412-34720420;refseq_id=NM_015578,NM_001114093;ensg_id=ENSG00000257103;gsymbol=LSM14A;+:200:+	2.96646	1.50651	9.38951e-23	3.27483e-21	7	16	13	24	31	39	115.439	242.748	151.427	951.626	1035.68	1260.91
chr17:79531005:79531205:chr17:79523913-79532633;refseq_id=NM_017921;ensg_id=ENSG00000182446;gsymbol=NPLOC4;-:200:-	2.96222	0.0412897	1.21891e-08	8.78954e-08	5	2	5	9	7	16	82.4565	30.3435	58.2411	356.86	233.863	517.297
chr1:12041826:12042026:chr1:12040238-12049400;refseq_id=NM_001127660;ensg_id=ENSG00000116688;gsymbol=MFN2;+:200:+	2.96153	0.116671	3.92174e-09	3.04648e-08	1	4	8	12	7	15	16.4913	60.687	93.1858	475.813	233.863	484.966
chr17:45917738:45917938:chr17:45916810-45918209;refseq_id=NM_001145023,NM_138355;ensg_id=ENSG00000141295;gsymbol=SCRN2;-:200:-	2.96077	-0.550251	6.62861e-06	2.8463e-05	0	4	3	7	3	9	0	60.687	34.9447	277.557	100.227	290.98
chr22:51020524:51020677:chr22:51020178-51020786;refseq_id=NR_027928,NM_005198;ensg_id=ENSG00000100288,ENSG00000254413;gsymbol=CHKB,CHKB-CPT1B;-:153:-	2.94137	-0.298102	5.50179e-07	2.88865e-06	1	3	5	4	12	8	16.4913	45.5152	58.2411	158.604	400.909	258.649
chr6:15505195:15505395:chr6:15504731-15507485;refseq_id=NM_004973,NM_001267040;ensg_id=ENSG00000008083;gsymbol=JARID2;+:200:+	2.93922	-0.293193	1.72615e-07	9.81696e-07	4	2	3	5	8	11	65.9652	30.3435	34.9447	198.255	267.272	355.642
chr22:37420851:37421042:chr22:37420233-37425863;refseq_id=NA;ensg_id=ENSG00000128309;gsymbol=MPST;+:191:+	2.93732	0.289602	1.03423e-11	1.27158e-10	5	1	9	11	12	16	82.4565	15.1717	104.834	436.162	400.909	517.297
chr12:53565772:53565972:chr12:53564207-53567260;refseq_id=NM_001244706,NM_015989,NM_001244705;ensg_id=ENSG00000139631;gsymbol=CSAD;-:200:-	2.93568	-0.294276	2.74609e-07	1.49699e-06	3	3	3	4	11	9	49.4739	45.5152	34.9447	158.604	367.5	290.98
chr20:37049745:37049945:chr20:37049239-37050888;refseq_id=NR_027241;ensg_id=ENSG00000196756;gsymbol=RP4-564F22.2;-:200:-	2.93489	1.97439	1.33664e-30	8.30661e-29	17	15	18	43	45	39	280.352	227.576	209.668	1705	1503.41	1260.91
chr17:74086478:74086678:chr17:74085256-74090662;refseq_id=NM_001013839,NM_001145297,NM_001145299,NM_001145298,NM_015219;ensg_id=ENSG00000182473;gsymbol=EXOC7;-:200:-	2.92955	0.163227	5.00048e-06	2.18284e-05	2	2	10	8	5	22	32.9826	30.3435	116.482	317.209	167.045	711.284
chr12:53699491:53699691:chr12:53696818-53700104;refseq_id=NM_021640;ensg_id=ENSG00000139637;gsymbol=C12orf10;+:200:+	2.9253	-0.0175801	8.7502e-06	3.68327e-05	4	1	7	14	3	13	65.9652	15.1717	81.5376	555.115	100.227	420.304
chr16:89862426:89862626:chr16:89858879-89865640;refseq_id=NM_000135;ensg_id=ENSG00000187741;gsymbol=FANCA;-:200:-	2.9239	0.775514	8.89053e-15	1.66054e-13	8	3	11	17	16	23	131.93	45.5152	128.13	674.068	534.545	743.615
chr2:10015793:10015993:chr2:10008405-10022934;refseq_id=NM_005680;ensg_id=ENSG00000115750;gsymbol=TAF1B;+:200:+	2.91854	0.192043	5.76233e-11	6.25259e-10	4	2	8	8	12	16	65.9652	30.3435	93.1858	317.209	400.909	517.297
chr5:169014002:169014202:chr5:169010638-169015579;refseq_id=NM_017785;ensg_id=ENSG00000040275;gsymbol=SPDL1;+:200:+	2.91565	1.14457	2.89919e-12	3.90136e-11	9	10	10	36	18	18	148.422	151.717	116.482	1427.44	601.363	581.959
chr8:17166835:17167035:chr8:17163266-17169145;refseq_id=NM_004686;ensg_id=ENSG00000003987;gsymbol=MTMR7;-:200:-	2.91357	-0.194099	1.04987e-07	6.20842e-07	5	2	3	8	11	7	82.4565	30.3435	34.9447	317.209	367.5	226.317
chrX:48339338:48339538:chrX:48337426-48339730;refseq_id=NM_012280,NM_177439;ensg_id=ENSG00000068438;gsymbol=FTSJ1;+:200:+	2.90718	-0.429456	2.21719e-06	1.03671e-05	5	3	0	7	6	8	82.4565	45.5152	0	277.557	200.454	258.649
chr5:74877662:74877862:chr5:74877034-74879242;refseq_id=NM_016218;ensg_id=ENSG00000122008;gsymbol=POLK;+:200:+	2.90641	0.705911	1.04466e-15	2.2457e-14	8	5	8	15	19	19	131.93	75.8587	93.1858	594.766	634.772	614.29
chr19:53120588:53120788:chr19:53119971-53122315;refseq_id=NM_018300,NM_001105554,NM_001105552,NM_001105550,NM_001105553,NM_001105549,NM_173529,NM_001105551,NM_001242531,NM_001242538,NR_048536,NM_001278268,NM_001277951;ensg_id=ENSG00000167766;gsymbol=ZNF83;-:200:-	2.89807	0.0882996	5.80527e-10	5.15387e-09	3	2	8	8	10	15	49.4739	30.3435	93.1858	317.209	334.091	484.966
chr16:30674180:30674362:chr16:30673880-30675837;refseq_id=NM_001105079;ensg_id=ENSG00000156860;gsymbol=FBRS;+:182:+	2.89745	-0.192312	2.49149e-06	1.15548e-05	5	3	2	7	5	14	82.4565	45.5152	23.2964	277.557	167.045	452.635
chrX:48380380:48380580:chrX:48380164-48382460;refseq_id=NM_006579;ensg_id=ENSG00000147155;gsymbol=EBP;+:200:+	2.88304	-0.437821	0.000101455	0.000356029	1	4	3	1	8	12	16.4913	60.687	34.9447	39.6511	267.272	387.973
chr5:138699247:138699447:chr5:138677519-138700432;refseq_id=NA;ensg_id=NA;gsymbol=NA;+:200:+	2.88157	-0.329796	2.47347e-07	1.3658e-06	3	2	4	6	7	10	49.4739	30.3435	46.5929	237.906	233.863	323.311
chr19:47700289:47700489:chr19:47673075-47706997;refseq_id=NM_005500,NM_001145714,NM_001145713;ensg_id=ENSG00000142230;gsymbol=SAE1;+:200:+	2.87528	1.06572	5.70965e-14	9.47359e-13	6	11	11	27	15	26	98.9479	166.889	128.13	1070.58	501.136	840.608
chr5:138614539:138614739:chr5:138611810-138644016;refseq_id=NM_199189,NM_001194954,NM_001194956,NM_018834,NM_001194955;ensg_id=ENSG00000015479;gsymbol=MATR3;+:200:+	2.87254	1.06055	1.17116e-16	2.77988e-15	8	5	15	25	19	24	131.93	75.8587	174.723	991.277	634.772	775.946
chr10:114919478:114919678:chr10:114918426-114927436;refseq_id=NM_001146286,NM_001198531,NM_001198530,NM_001198529,NM_001146284,NM_001146283,NM_001198526,NM_001146285,NM_001146274,NM_001198525,NM_030756,NM_001198528,NM_001198527;ensg_id=ENSG00000148737;gsymbol=TCF7L2;+:200:+	2.8719	-0.0198314	1.99473e-07	1.12508e-06	3	3	6	6	7	17	49.4739	45.5152	69.8893	237.906	233.863	549.628
chr15:75655631:75655831:chr15:75654983-75656529;refseq_id=NM_001256495,NM_006715,NM_001256496,NM_001256494;ensg_id=ENSG00000140400;gsymbol=MAN2C1;-:200:-	2.86494	0.17061	2.16148e-09	1.74655e-08	5	5	4	6	16	13	82.4565	75.8587	46.5929	237.906	534.545	420.304
chr5:151169683:151169883:chr5:151166133-151170623;refseq_id=NM_005754,NM_198395;ensg_id=ENSG00000145907;gsymbol=G3BP1;+:200:+	2.86277	1.5101	5.32691e-16	1.15237e-14	9	10	20	41	27	24	148.422	151.717	232.964	1625.69	902.045	775.946
chr11:2975640:2975756:chr11:2973010-2975876;refseq_id=NM_005969;ensg_id=ENSG00000205531;gsymbol=NAP1L4;-:116:-	2.86067	0.240153	3.67323e-11	4.12997e-10	2	5	8	11	12	14	32.9826	75.8587	93.1858	436.162	400.909	452.635
chr12:49524057:49524257:chr12:49523283-49525178;refseq_id=NM_006082;ensg_id=ENSG00000123416;gsymbol=TUBA1B;-:200:-	2.85746	-0.229974	3.6933e-08	2.38633e-07	2	4	4	7	9	9	32.9826	60.687	46.5929	277.557	300.682	290.98
chr14:21722752:21722952:chr14:21702112-21731495;refseq_id=NM_004500,NM_001077443,NM_031314,NM_001077442;ensg_id=ENSG00000092199;gsymbol=HNRNPC;-:200:-	2.85123	0.666106	6.36369e-15	1.21514e-13	6	6	9	17	16	18	98.9479	91.0305	104.834	674.068	534.545	581.959
chr1:46713815:46714015:chr1:46713367-46714270;refseq_id=NM_001142548;ensg_id=ENSG00000085999;gsymbol=RAD54L;+:200:+	2.85022	1.45507	7.77306e-20	2.17773e-18	15	7	15	25	26	38	247.37	106.202	174.723	991.277	868.636	1228.58
chr3:38538133:38538333:chr3:38537763-38539269;refseq_id=NM_005107,NM_001145464;ensg_id=ENSG00000157036;gsymbol=EXOG;+:200:+	2.84643	0.307571	5.969e-12	7.62958e-11	2	4	10	10	14	15	32.9826	60.687	116.482	396.511	467.727	484.966
chr17:7154920:7155120:chr17:7150596-7155810;refseq_id=NA;ensg_id=ENSG00000175826,ENSG00000262302;gsymbol=CTDNEP1,RP1-4G17.5;-:200:-	2.84332	0.527955	7.8386e-14	1.26978e-12	6	4	9	13	16	17	98.9479	60.687	104.834	515.464	534.545	549.628
chr7:44118037:44118152:chr7:44116108-44118410;refseq_id=NM_013284;ensg_id=ENSG00000122678;gsymbol=POLM;-:115:-	2.83962	-0.134824	8.2856e-08	4.95975e-07	5	1	5	10	7	10	82.4565	15.1717	58.2411	396.511	233.863	323.311
chr5:134118434:134118634:chr5:134117611-134120231;refseq_id=NM_014829;ensg_id=ENSG00000145833;gsymbol=DDX46;+:200:+	2.83908	-0.132763	1.07573e-07	6.33939e-07	6	1	4	11	8	8	98.9479	15.1717	46.5929	436.162	267.272	258.649
chr17:28444119:28444319:chr17:28443834-28445191;refseq_id=NM_032141,NM_001261467;ensg_id=ENSG00000126653;gsymbol=NSRP1;+:200:+	2.83438	0.936863	9.62876e-13	1.38282e-11	4	11	11	15	16	31	65.9652	166.889	128.13	594.766	534.545	1002.26
chr15:52892432:52892632:chr15:52885775-52893362;refseq_id=NM_019600;ensg_id=ENSG00000047346;gsymbol=FAM214A;-:200:-	2.83424	-0.131053	9.68305e-07	4.86716e-06	7	1	3	11	9	7	115.439	15.1717	34.9447	436.162	300.682	226.317
chr2:27534819:27535019:chr2:27532360-27535114;refseq_id=NM_002437;ensg_id=ENSG00000115204;gsymbol=MPV17;-:200:-	2.83351	-0.171278	2.72609e-06	1.25239e-05	2	1	8	12	5	9	32.9826	15.1717	93.1858	475.813	167.045	290.98
chr2:216184187:216184387:chr2:216182880-216190052;refseq_id=NM_004044;ensg_id=ENSG00000138363;gsymbol=ATIC;+:200:+	2.82582	1.21275	3.39946e-16	7.59435e-15	9	7	16	25	18	32	148.422	106.202	186.372	991.277	601.363	1034.59
chr3:49134720:49134920:chr3:49133365-49135550;refseq_id=NR_073590,NM_001272073,NM_005051;ensg_id=ENSG00000172053;gsymbol=QARS;-:200:-	2.82322	-0.475004	2.78061e-05	0.000106668	3	2	3	2	7	11	49.4739	30.3435	34.9447	79.3021	233.863	355.642
chr16:29819350:29819550:chr16:29817855-29820062;refseq_id=NM_001276275;ensg_id=ENSG00000103495;gsymbol=MAZ;+:200:+	2.8225	0.146257	5.86949e-08	3.61476e-07	3	8	3	8	9	17	49.4739	121.374	34.9447	317.209	300.682	549.628
chr10:104119740:104119940:chr10:104119027-104120877;refseq_id=NM_001199379,NM_001199378,NM_004193;ensg_id=ENSG00000107862;gsymbol=GBF1;+:200:+	2.82225	-0.13778	4.52914e-06	1.99492e-05	4	2	5	3	8	16	65.9652	30.3435	58.2411	118.953	267.272	517.297
chr16:30012534:30012734:chr16:30012250-30017112;refseq_id=NM_173618;ensg_id=ENSG00000169592;gsymbol=INO80E;+:200:+	2.82219	-0.135995	1.43619e-06	6.9026e-06	4	3	4	4	8	15	65.9652	45.5152	46.5929	158.604	267.272	484.966
chr12:111082571:111082771:chr12:111078829-111085141;refseq_id=NM_001082538,NM_001082537,NM_024549,NM_001173976,NM_001173975;ensg_id=ENSG00000204852;gsymbol=TCTN1;+:200:+	2.82204	0.44805	8.75127e-13	1.26745e-11	6	6	6	13	15	15	98.9479	91.0305	69.8893	515.464	501.136	484.966
chr16:30012585:30012785:chr16:30012250-30017112;refseq_id=NM_173618;ensg_id=ENSG00000169592;gsymbol=INO80E;+:200:+	2.82048	-0.13588	2.30769e-06	1.07462e-05	4	3	4	4	7	16	65.9652	45.5152	46.5929	158.604	233.863	517.297
chr7:72420030:72420230:chr7:72419431-72420500;refseq_id=NR_033323;ensg_id=ENSG00000106133;gsymbol=NSUN5P2;-:200:-	2.81821	-0.367327	4.3641e-07	2.32344e-06	1	3	5	8	7	7	16.4913	45.5152	58.2411	317.209	233.863	226.317
chr6:138733019:138733219:chr6:138727108-138734310;refseq_id=NM_014320;ensg_id=ENSG00000051620;gsymbol=HEBP2;+:200:+	2.81104	0.446491	2.09578e-10	2.08237e-09	7	5	6	8	16	19	115.439	75.8587	69.8893	317.209	534.545	614.29
chr1:206631516:206631716:chr1:206628224-206632293;refseq_id=NM_015326,NM_001170637;ensg_id=ENSG00000163486;gsymbol=SRGAP2;+:200:+	2.81015	0.50792	6.49735e-12	8.25574e-11	4	8	7	11	14	20	65.9652	121.374	81.5376	436.162	467.727	646.621
chr4:1895256:1895456:chr4:1894509-1901122;refseq_id=NM_007331,NM_133331,NM_133335,NM_133330,NM_133334;ensg_id=ENSG00000109685;gsymbol=WHSC1;+:200:+	2.80916	-0.361046	9.69078e-06	4.0394e-05	6	1	2	7	5	10	98.9479	15.1717	23.2964	277.557	167.045	323.311
chr6:166782449:166782649:chr6:166780283-166783709;refseq_id=NM_001271668,NM_001271669,NM_016098;ensg_id=ENSG00000060762;gsymbol=MPC1;-:200:-	2.7996	-0.26304	1.65753e-07	9.52173e-07	3	3	4	7	6	11	49.4739	45.5152	46.5929	277.557	200.454	355.642
chr14:23377589:23377789:chr14:23375404-23388358;refseq_id=NM_018107,NM_001077351,NM_001077352;ensg_id=ENSG00000100461;gsymbol=RBM23;-:200:-	2.79923	-0.266197	1.61207e-07	9.27618e-07	1	4	5	6	11	7	16.4913	60.687	58.2411	237.906	367.5	226.317
chr16:684956:685156:chr16:684719-685340;refseq_id=NM_001040161,NM_032366,NM_001040160,NM_001040165,NM_001040162;ensg_id=ENSG00000130731;gsymbol=C16orf13;-:200:-	2.79575	0.623543	5.53193e-14	9.22348e-13	5	5	11	17	15	17	82.4565	75.8587	128.13	674.068	501.136	549.628
chr4:109741054:109741254:chr4:109738553-109745383;refseq_id=NM_198721,NR_045756;ensg_id=ENSG00000188517;gsymbol=COL25A1;-:200:-	2.7937	0.624526	3.83823e-14	6.49459e-13	4	8	9	15	19	15	65.9652	121.374	104.834	594.766	634.772	484.966
chr11:10830055:10830251:chr11:10828802-10830582;refseq_id=NM_001418,NM_001042559;ensg_id=ENSG00000110321;gsymbol=EIF4G2;-:196:-	2.79226	0.115504	1.33418e-09	1.12321e-08	5	2	7	11	10	12	82.4565	30.3435	81.5376	436.162	334.091	387.973
chr14:31067488:31067688:chr14:31066626-31071100;refseq_id=NM_017769;ensg_id=ENSG00000092140;gsymbol=G2E3;+:200:+	2.79152	1.20531	5.19816e-17	1.25122e-15	14	7	11	27	25	22	230.878	106.202	128.13	1070.58	835.227	711.284
chr16:30733683:30733883:chr16:30733443-30734550;refseq_id=NM_006662;ensg_id=ENSG00000080603;gsymbol=SRCAP;+:200:+	2.79025	0.806471	9.29892e-14	1.49219e-12	11	4	9	12	23	21	181.404	60.687	104.834	475.813	768.408	678.952
chr11:66134035:66134235:chr11:66133597-66135019;refseq_id=NM_001532;ensg_id=ENSG00000174669;gsymbol=SLC29A2;-:200:-	2.78871	-0.0836848	1.0477e-07	6.20628e-07	2	1	9	8	7	13	32.9826	15.1717	104.834	317.209	233.863	420.304
chr18:47018203:47018403:chr18:47017902-47018834;refseq_id=NM_001035006,NM_001199345,NM_000985,NM_001199340;ensg_id=ENSG00000265681,ENSG00000215472;gsymbol=RPL17,RPL17-C18ORF32;-:200:-	2.78395	1.43753	1.15139e-21	3.74804e-20	8	14	16	29	28	30	131.93	212.404	186.372	1149.88	935.454	969.932
chr17:73844011:73844211:chr17:73843568-73844743;refseq_id=NM_012478;ensg_id=ENSG00000132471;gsymbol=WBP2;-:200:-	2.77798	-0.402038	0.000104343	0.000365788	1	4	4	8	2	11	16.4913	60.687	46.5929	317.209	66.8181	355.642
chr19:39389065:39389265:chr19:39384459-39389558;refseq_id=NM_030593,NM_001193286,NM_012237;ensg_id=ENSG00000068903;gsymbol=SIRT2;-:200:-	2.77067	-0.63299	0.000122208	0.000418545	4	1	2	2	7	8	65.9652	15.1717	23.2964	79.3021	233.863	258.649
chr6:166782453:166782653:chr6:166780283-166796486;refseq_id=NM_001271668,NM_001271669,NM_016098;ensg_id=ENSG00000060762;gsymbol=MPC1;-:200:-	2.76972	-0.0796172	1.75287e-08	1.22773e-07	3	3	6	7	9	12	49.4739	45.5152	69.8893	277.557	300.682	387.973
chr9:13165407:13165607:chr9:13162690-13168563;refseq_id=NM_001261406,NM_003829,NM_001261407;ensg_id=ENSG00000107186;gsymbol=MPDZ;-:200:-	2.7688	0.263357	7.32541e-10	6.40364e-09	2	8	6	8	13	16	32.9826	121.374	69.8893	317.209	434.318	517.297
chr18:697355:697555:chr18:694248-706578;refseq_id=NM_202758,NM_017512,NM_001126123;ensg_id=ENSG00000132199;gsymbol=ENOSF1;-:200:-	2.76798	0.66447	3.16065e-10	3.01763e-09	4	10	8	18	10	22	65.9652	151.717	93.1858	713.719	334.091	711.284
chr11:126137981:126138181:chr11:126137444-126138877;refseq_id=NA;ensg_id=ENSG00000182934;gsymbol=SRPR;-:200:-	2.76694	-0.513593	1.1063e-05	4.56684e-05	2	3	3	6	9	4	32.9826	45.5152	34.9447	237.906	300.682	129.324
chr12:32491519:32491719:chr12:32490433-32520679;refseq_id=NM_001714,NM_001003398;ensg_id=ENSG00000151746;gsymbol=BICD1;+:200:+	2.7655	2.16076	7.12206e-34	5.796e-32	22	18	22	39	53	48	362.809	273.091	256.261	1546.39	1770.68	1551.89
chr16:2014629:2014807:chr16:2014277-2014827;refseq_id=NM_002952;ensg_id=ENSG00000140988;gsymbol=RPS2;-:178:-	2.76285	0.269291	1.23865e-06	6.10046e-06	8	3	5	12	5	20	131.93	45.5152	58.2411	475.813	167.045	646.621
chr15:55657507:55657707:chr15:55647421-55664242;refseq_id=NA;ensg_id=NA;gsymbol=NA;-:200:-	2.75493	-0.401194	2.25498e-06	1.05294e-05	4	1	4	8	5	8	65.9652	15.1717	46.5929	317.209	167.045	258.649
chr1:154186422:154186622:chr1:154184934-154187050;refseq_id=NM_001098616,NM_015449,NM_138740;ensg_id=ENSG00000143612;gsymbol=C1orf43;-:200:-	2.7538	-0.40233	1.6063e-06	7.68957e-06	2	3	4	7	5	9	32.9826	45.5152	46.5929	277.557	167.045	290.98
chr1:92415661:92415861:chr1:92414928-92428503;refseq_id=NM_001242806,NM_207189,NM_001242807,NM_001242808,NM_001242810,NM_001242805;ensg_id=ENSG00000137948;gsymbol=BRDT;+:200:+	2.75344	-0.402324	1.4271e-06	6.8702e-06	2	3	4	8	8	5	32.9826	45.5152	46.5929	317.209	267.272	161.655
chr2:27448798:27448998:chr2:27448573-27449517;refseq_id=NM_004341;ensg_id=ENSG00000084774;gsymbol=CAD;+:200:+	2.75137	-0.400746	1.42294e-06	6.8598e-06	4	2	3	6	8	7	65.9652	30.3435	34.9447	237.906	267.272	226.317
chr10:105155789:105155989:chr10:105152128-105156270;refseq_id=NA;ensg_id=NA;gsymbol=NA;-:200:-	2.74601	0.163941	1.10771e-09	9.41827e-09	2	5	8	13	9	12	32.9826	75.8587	93.1858	515.464	300.682	387.973
chr1:17742:17914:chr1:17233-18061;refseq_id=NR_024540;ensg_id=ENSG00000227232;gsymbol=WASH7P;-:172:-	2.74343	-0.302896	4.19889e-06	1.86629e-05	0	4	6	4	8	11	0	60.687	69.8893	158.604	267.272	355.642
chrX:48793629:48793829:chrX:48792227-48801544;refseq_id=NM_001136158,NM_017602,NM_001136157,NM_001136159;ensg_id=ENSG00000068308;gsymbol=OTUD5;-:200:-	2.74292	-0.300378	2.63137e-07	1.44831e-06	2	2	6	9	8	6	32.9826	30.3435	69.8893	356.86	267.272	193.986
chr12:124473655:124473855:chr12:124472593-124495988;refseq_id=NM_152437,NM_001204298;ensg_id=ENSG00000179195,ENSG00000255906;gsymbol=ZNF664,RP11-522N14.1;+:200:+	2.73909	-0.208643	7.13186e-07	3.67728e-06	1	1	9	5	10	10	16.4913	15.1717	104.834	198.255	334.091	323.311
chr17:47011938:47012138:chr17:47010567-47013604;refseq_id=NM_007241;ensg_id=ENSG00000159210;gsymbol=SNF8;-:200:-	2.73774	-0.298453	2.7401e-07	1.49611e-06	3	3	4	5	8	10	49.4739	45.5152	46.5929	198.255	267.272	323.311
chr14:65946224:65946424:chr14:65922339-66028484;refseq_id=NM_178155,NM_178156,NM_004480,NR_038167;ensg_id=ENSG00000033170;gsymbol=FUT8;+:200:+	2.73772	-0.0196502	9.64551e-07	4.85947e-06	4	3	6	15	7	7	65.9652	45.5152	69.8893	594.766	233.863	226.317
chr5:93955569:93955769:chr5:93954391-93964629;refseq_id=NM_032290;ensg_id=ENSG00000133302;gsymbol=ANKRD32;+:200:+	2.72481	-0.199795	4.68589e-07	2.47932e-06	4	3	4	7	12	6	65.9652	45.5152	46.5929	277.557	400.909	193.986
chr5:137355666:137355866:chr5:137354644-137356886;refseq_id=NM_016603,NM_001101801,NM_001101800;ensg_id=ENSG00000031003;gsymbol=FAM13B;-:200:-	2.72365	0.309248	2.2938e-10	2.24648e-09	5	5	7	9	12	17	82.4565	75.8587	81.5376	356.86	400.909	549.628
chr3:37090194:37090394:chr3:37070275-37092337;refseq_id=NM_000249,NM_001258273,NM_001258271,NM_001258274,NM_001167617,NM_001167618,NM_001167619;ensg_id=ENSG00000076242;gsymbol=MLH1;+:200:+	2.71815	0.380708	4.5155e-11	4.9787e-10	5	8	5	13	15	12	82.4565	121.374	58.2411	515.464	501.136	387.973
chr11:75113195:75113395:chr11:75112684-75115251;refseq_id=NM_001276726,NM_001005,NM_001276724,NM_020929;ensg_id=ENSG00000149273;gsymbol=RPS3;+:200:+	2.7072	0.212966	9.61659e-09	7.03844e-08	2	6	8	14	8	13	32.9826	91.0305	93.1858	555.115	267.272	420.304
chr16:29820660:29820860:chr16:29819891-29822504;refseq_id=NA;ensg_id=NA;gsymbol=NA;+:200:+	2.69764	0.208062	2.57028e-07	1.41697e-06	2	5	9	5	11	19	32.9826	75.8587	104.834	198.255	367.5	614.29
chr1:38481830:38482030:chr1:38478384-38483442;refseq_id=NA;ensg_id=ENSG00000183520;gsymbol=UTP11L;+:200:+	2.68966	0.280625	3.52517e-10	3.31018e-09	3	4	10	10	11	16	49.4739	60.687	116.482	396.511	367.5	517.297
chr7:128504973:128505173:chr7:128502857-128505903;refseq_id=NA;ensg_id=NA;gsymbol=NA;+:200:+	2.68814	-0.440537	9.11205e-06	3.81212e-05	1	4	4	6	4	10	16.4913	60.687	46.5929	237.906	133.636	323.311
chr4:103747793:103747993:chr4:103730949-103790032;refseq_id=NA;ensg_id=ENSG00000109332;gsymbol=UBE2D3;-:200:-	2.68283	-0.439859	4.74875e-06	2.08093e-05	3	2	4	6	5	9	49.4739	30.3435	46.5929	237.906	167.045	290.98
chr1:15038:15238:chr1:14362-15947;refseq_id=NA;ensg_id=NA;gsymbol=NA;-:200:-	2.66599	-0.140031	1.03025e-07	6.11354e-07	4	2	6	10	7	9	65.9652	30.3435	69.8893	396.511	233.863	290.98
chr11:129763280:129763480:chr11:129762610-129764333;refseq_id=NM_001143835;ensg_id=ENSG00000170322;gsymbol=NFRKB;-:200:-	2.66451	0.706012	3.12754e-14	5.39895e-13	3	7	14	14	17	20	49.4739	106.202	163.075	555.115	567.954	646.621
chr2:9558861:9559061:chr2:9552398-9563643;refseq_id=NM_004763,NM_022334;ensg_id=ENSG00000119185;gsymbol=ITGB1BP1;-:200:-	2.66365	-0.144478	5.79393e-08	3.57467e-07	2	2	8	8	8	10	32.9826	30.3435	93.1858	317.209	267.272	323.311
chr6:127652175:127652375:chr6:127648147-127664754;refseq_id=NM_001002030,NM_001105544,NM_018479,NM_001105545;ensg_id=ENSG00000093144;gsymbol=ECHDC1;-:200:-	2.65915	-0.0488172	8.08684e-08	4.85779e-07	5	4	4	9	12	7	82.4565	60.687	46.5929	356.86	400.909	226.317
chr5:137865367:137865567:chr5:137854381-137877400;refseq_id=NM_004730,NR_045994;ensg_id=ENSG00000120705;gsymbol=ETF1;-:200:-	2.65718	-0.131809	8.13281e-07	4.14895e-06	7	4	1	10	8	8	115.439	60.687	11.6482	396.511	267.272	258.649
chr19:35996888:35997088:chr19:35996620-36001154;refseq_id=NM_001126056,NM_001190347,NM_033317,NM_001126059,NM_001035516,NM_001190348,NM_001126057,NM_001126058,NM_001190349;ensg_id=ENSG00000161249;gsymbol=DMKN;-:200:-	2.65045	0.188247	2.73595e-09	2.19004e-08	3	6	7	13	11	10	49.4739	91.0305	81.5376	515.464	367.5	323.311
chr20:17956126:17956326:chr20:17950444-17968941;refseq_id=NM_052865;ensg_id=ENSG00000125871;gsymbol=C20orf72;+:200:+	2.64806	0.767108	3.09584e-10	2.96403e-09	7	10	8	15	27	11	115.439	151.717	93.1858	594.766	902.045	355.642
chr12:56679028:56679228:chr12:56677576-56679807;refseq_id=NM_004077;ensg_id=ENSG00000062485;gsymbol=CS;-:200:-	2.6479	0.330257	8.09213e-09	5.97384e-08	3	8	7	11	9	18	49.4739	121.374	81.5376	436.162	300.682	581.959
chr1:155238583:155238783:chr1:155238084-155239507;refseq_id=NM_003993;ensg_id=ENSG00000176444;gsymbol=CLK2;-:200:-	2.64591	1.31638	6.04e-13	9.0547e-12	9	10	19	24	16	38	148.422	151.717	221.316	951.626	534.545	1228.58
chr12:132569308:132569508:chr12:132568828-132588715;refseq_id=NA;ensg_id=ENSG00000185684;gsymbol=EP400NL;+:200:+	2.64419	0.331726	5.79629e-10	5.15387e-09	4	8	6	11	11	16	65.9652	121.374	69.8893	436.162	367.5	517.297
chr2:175262802:175263002:chr2:175260457-175264831;refseq_id=NA;ensg_id=NA;gsymbol=NA;+:200:+	2.64063	0.460084	1.41052e-11	1.69164e-10	6	6	8	11	17	14	98.9479	91.0305	93.1858	436.162	567.954	452.635
chr2:203084829:203085029:chr2:203079080-203103322;refseq_id=NM_001005781,NM_001005782;ensg_id=ENSG00000116030;gsymbol=SUMO1;-:200:-	2.63711	0.469378	9.25155e-08	5.51864e-07	7	9	4	20	13	9	115.439	136.546	46.5929	793.021	434.318	290.98
chr3:130613351:130613551:chr3:130612835-130649370;refseq_id=NM_001199182,NM_001199181,NM_001199180,NM_001199184,NM_001199179;ensg_id=ENSG00000017260;gsymbol=ATP2C1;+:200:+	2.63455	-0.175122	1.03271e-06	5.15298e-06	2	2	8	11	6	8	32.9826	30.3435	93.1858	436.162	200.454	258.649
chr6:30617327:30617527:chr6:30614816-30618859;refseq_id=NM_001161376,NM_001109938,NM_145029;ensg_id=ENSG00000204564;gsymbol=C6orf136;+:200:+	2.63364	-0.0520671	9.79811e-06	4.07916e-05	6	2	5	4	16	8	98.9479	30.3435	58.2411	158.604	534.545	258.649
chr20:30136917:30137009:chr20:30136832-30137924;refseq_id=NM_178581,NM_030789,NM_178580;ensg_id=ENSG00000101294;gsymbol=HM13;+:92:+	2.61717	-0.598115	8.04531e-05	0.000287946	2	1	5	6	8	3	32.9826	15.1717	58.2411	237.906	267.272	96.9932
chr5:72794758:72794958:chr5:72794250-72798426;refseq_id=NA;ensg_id=ENSG00000145741;gsymbol=BTF3;+:200:+	2.6143	0.307086	1.47755e-08	1.05433e-07	3	8	7	13	8	16	49.4739	121.374	81.5376	515.464	267.272	517.297
chr9:21994052:21994252:chr9:21970901-21995300;refseq_id=NA;ensg_id=ENSG00000147889;gsymbol=CDKN2A;-:200:-	2.61138	0.556015	3.93797e-11	4.39261e-10	5	5	12	12	13	20	82.4565	75.8587	139.779	475.813	434.318	646.621
chr7:112428599:112428799:chr7:112423753-112430478;refseq_id=NM_022484;ensg_id=ENSG00000146802;gsymbol=TMEM168;-:200:-	2.60982	-0.268672	1.19503e-06	5.91118e-06	1	5	5	7	6	10	16.4913	75.8587	58.2411	277.557	200.454	323.311
chr12:49959998:49960198:chr12:49959312-49961911;refseq_id=NM_006337;ensg_id=ENSG00000187778;gsymbol=MCRS1;-:200:-	2.6093	-0.370909	5.18727e-06	2.25287e-05	2	3	5	7	9	5	32.9826	45.5152	58.2411	277.557	300.682	161.655
chr1:1041429:1041629:chr1:1027371-1051736;refseq_id=NM_017891;ensg_id=ENSG00000131591;gsymbol=C1orf159;-:200:-	2.60892	1.12834	4.14808e-10	3.87381e-09	12	12	9	19	13	36	197.896	182.061	104.834	753.37	434.318	1163.92
chr3:49514081:49514281:chr3:49507565-49548252;refseq_id=NM_001177643,NM_001177635,NM_001177639,NM_001177642,NM_001177640,NM_001177637,NM_004393,NM_001177644,NM_001177638,NM_001177641,NM_001165928,NM_001177634,NM_001177636;ensg_id=ENSG00000173402;gsymbol=DAG1;+:200:+	2.6088	0.565863	2.70217e-08	1.81454e-07	8	7	7	17	8	20	131.93	106.202	81.5376	674.068	267.272	646.621
chr17:4618338:4618445:chr17:4618308-4619328;refseq_id=NM_001257330,NM_001257328,NM_004313,NR_049852,NM_001257331,NM_199004;ensg_id=ENSG00000141480;gsymbol=ARRB2;+:107:+	2.60874	-0.373025	1.11838e-05	4.60564e-05	3	1	6	4	9	8	49.4739	15.1717	69.8893	158.604	300.682	258.649
chr19:48654596:48654796:chr19:48653345-48660397;refseq_id=NM_000234;ensg_id=ENSG00000105486;gsymbol=LIG1;-:200:-	2.60646	0.232535	1.06128e-09	9.07133e-09	5	3	9	9	12	14	82.4565	45.5152	104.834	356.86	400.909	452.635
chr6:88274380:88274580:chr6:88273848-88279308;refseq_id=NM_020320;ensg_id=ENSG00000146282;gsymbol=RARS2;-:200:-	2.60495	-0.597867	9.15029e-05	0.00032343	2	2	4	2	7	8	32.9826	30.3435	46.5929	79.3021	233.863	258.649
chr7:102918793:102918993:chr7:102918061-102920913;refseq_id=NA;ensg_id=NA;gsymbol=NA;-:200:-	2.60349	0.00758896	2.43843e-07	1.34863e-06	4	7	3	9	13	7	65.9652	106.202	34.9447	356.86	434.318	226.317
chr10:79799761:79799961:chr10:79796952-79800473;refseq_id=NM_001142285;ensg_id=ENSG00000138326;gsymbol=RPS24;+:200:+	2.60212	3.91634	2.2563e-49	7.01094e-47	49	78	82	129	133	155	808.074	1183.4	955.154	5114.99	4443.41	5011.32
chr2:109067283:109067483:chr2:109066089-109068922;refseq_id=NM_181453,NR_028063;ensg_id=ENSG00000135968;gsymbol=GCC2;+:200:+	2.60135	0.312946	6.43409e-07	3.34729e-06	6	8	4	17	14	6	98.9479	121.374	46.5929	674.068	467.727	193.986
chr9:128677764:128677964:chr9:128510829-128692124;refseq_id=NR_024123,NM_006195,NR_024122,NM_001134778;ensg_id=ENSG00000167081;gsymbol=PBX3;+:200:+	2.6001	-0.370036	1.43065e-05	5.77327e-05	4	2	4	3	9	9	65.9652	30.3435	46.5929	118.953	300.682	290.98
chr4:122737098:122737298:chr4:122735021-122737602;refseq_id=NM_001034194,NM_005033;ensg_id=ENSG00000123737;gsymbol=EXOSC9;+:200:+	2.59885	-0.264435	2.25645e-05	8.77422e-05	5	3	3	6	5	12	82.4565	45.5152	34.9447	237.906	167.045	387.973
chr1:155238586:155238786:chr1:155238084-155239507;refseq_id=NM_003993;ensg_id=ENSG00000176444;gsymbol=CLK2;-:200:-	2.59154	1.34965	4.14861e-12	5.39161e-11	10	10	20	24	16	39	164.913	151.717	232.964	951.626	534.545	1260.91
chr10:79799758:79799958:chr10:79796952-79800473;refseq_id=NM_001142285;ensg_id=ENSG00000138326;gsymbol=RPS24;+:200:+	2.58802	3.91939	5.17533e-47	1.17929e-44	49	80	82	129	133	155	808.074	1213.74	955.154	5114.99	4443.41	5011.32
chr12:122240690:122240784:chr12:122239613-122241390;refseq_id=NR_002809;ensg_id=ENSG00000212694;gsymbol=AC084018.1;-:94:-	2.58521	0.86649	1.22127e-12	1.7393e-11	10	7	11	22	16	18	164.913	106.202	128.13	872.324	534.545	581.959
chr12:6781698:6781898:chr12:6779926-6782606;refseq_id=NM_133476,NM_001039920,NM_001135734;ensg_id=ENSG00000126746;gsymbol=ZNF384;-:200:-	2.57949	-0.30462	3.67382e-05	0.000139214	3	1	7	8	3	11	49.4739	15.1717	81.5376	317.209	100.227	355.642
chr14:21731495:21731695:chr14:21702112-21737638;refseq_id=NM_004500,NM_001077443,NM_031314,NM_001077442;ensg_id=ENSG00000092199;gsymbol=HNRNPC;-:200:-	2.57799	3.58415	3.4159e-36	4.02605e-34	46	47	80	100	100	137	758.6	713.072	931.858	3965.11	3340.91	4429.36
chr10:970373:970573:chr10:931581-977645;refseq_id=NA;ensg_id=NA;gsymbol=NA;-:200:-	2.57271	0.0549861	7.62954e-07	3.92147e-06	4	3	8	9	6	15	65.9652	45.5152	93.1858	356.86	200.454	484.966
chr6:33243076:33243276:chr6:33240405-33243660;refseq_id=NM_022551;ensg_id=ENSG00000231500;gsymbol=RPS18;+:200:+	2.5623	0.139713	9.94137e-09	7.2606e-08	7	4	5	12	9	11	115.439	60.687	58.2411	475.813	300.682	355.642
chr1:231480168:231480368:chr1:231475515-231483671;refseq_id=NM_032018,NM_001010984,NM_001261462;ensg_id=ENSG00000010072;gsymbol=SPRTN;+:200:+	2.5514	0.639452	5.88465e-10	5.21081e-09	7	9	8	19	11	17	115.439	136.546	93.1858	753.37	367.5	549.628
chr12:58163739:58163939:chr12:58163348-58165040;refseq_id=NM_005371,NM_023033;ensg_id=ENSG00000037897;gsymbol=METTL1;-:200:-	2.5488	-0.202521	1.40934e-06	6.80383e-06	2	7	3	6	9	9	32.9826	106.202	34.9447	237.906	300.682	290.98
chr13:29233758:29233958:chr13:29233141-29236644;refseq_id=NA;ensg_id=NA;gsymbol=NA;+:200:+	2.54682	-0.303439	3.4361e-06	1.54996e-05	0	6	5	8	8	6	0	91.0305	58.2411	317.209	267.272	193.986
chr5:180481038:180481238:chr5:180480469-180482316;refseq_id=NM_152547;ensg_id=ENSG00000165810;gsymbol=BTNL9;+:200:+	2.54669	-0.23638	0.000173578	0.000578821	3	3	6	13	2	8	49.4739	45.5152	69.8893	515.464	66.8181	258.649
chr12:95657321:95657521:chr12:95656682-95660408;refseq_id=NM_017599,NR_038241,NR_038242;ensg_id=ENSG00000028203;gsymbol=VEZT;+:200:+	2.54595	0.631206	2.63903e-12	3.57944e-11	5	7	12	14	17	16	82.4565	106.202	139.779	555.115	567.954	517.297
chr15:89837945:89838145:chr15:89837064-89843197;refseq_id=NM_018193,NM_001113378;ensg_id=ENSG00000140525;gsymbol=FANCI;+:200:+	2.54584	-0.20113	2.56541e-06	1.18334e-05	5	4	3	6	7	11	82.4565	60.687	34.9447	237.906	233.863	355.642
chr4:40101455:40101655:chr4:40098847-40104838;refseq_id=NM_018177;ensg_id=ENSG00000078177;gsymbol=N4BP2;+:200:+	2.54317	0.634712	6.53926e-08	3.99842e-07	5	10	9	11	10	26	82.4565	151.717	104.834	436.162	334.091	840.608
chr17:26657254:26657454:chr17:26656199-26657554;refseq_id=NM_174887,NM_001267776,NM_001256932,NM_001256829,NM_001267774;ensg_id=ENSG00000109083;gsymbol=IFT20;-:200:-	2.54102	0.518469	2.8686e-11	3.29023e-10	5	8	9	15	16	12	82.4565	121.374	104.834	594.766	534.545	387.973
chr16:2818305:2818505:chr16:2811562-2819285;refseq_id=NM_016333;ensg_id=ENSG00000167978;gsymbol=SRRM2;+:200:+	2.53677	3.43386	2.87772e-34	2.65839e-32	38	49	74	97	89	118	626.67	743.415	861.969	3846.15	2973.41	3815.07
chr5:7873285:7873485:chr5:7870883-7875488;refseq_id=NM_024010,NM_002454;ensg_id=ENSG00000124275;gsymbol=MTRR;+:200:+	2.53631	0.388502	1.37043e-10	1.41088e-09	2	7	11	13	12	14	32.9826	106.202	128.13	515.464	400.909	452.635
chr16:2012910:2013110:chr16:2012498-2013257;refseq_id=NM_002952;ensg_id=ENSG00000140988;gsymbol=RPS2;-:200:-	2.529	2.02246	2.33842e-18	6.0551e-17	16	18	31	36	32	55	263.861	273.091	361.095	1427.44	1069.09	1778.21
chr1:155880595:155880795:chr1:155880241-155881193;refseq_id=NR_049741,NM_006912,NM_001256820;ensg_id=ENSG00000143622;gsymbol=RIT1;-:200:-	2.52331	-0.637361	9.9009e-05	0.000347803	2	3	3	6	7	3	32.9826	45.5152	34.9447	237.906	233.863	96.9932
chr15:77577397:77577597:chr15:77544709-77578846;refseq_id=NM_024776;ensg_id=ENSG00000173517;gsymbol=PEAK1;-:200:-	2.52198	0.186062	1.35671e-08	9.74209e-08	8	2	7	11	11	11	131.93	30.3435	81.5376	436.162	367.5	355.642
chr12:49231176:49231376:chr12:49230677-49231863;refseq_id=NM_004818;ensg_id=ENSG00000174243;gsymbol=DDX23;-:200:-	2.51651	0.105316	3.10577e-08	2.04144e-07	5	3	8	6	13	12	82.4565	45.5152	93.1858	237.906	434.318	387.973
chr12:76450452:76450652:chr12:76449813-76454059;refseq_id=NM_139207,NM_004537;ensg_id=ENSG00000187109;gsymbol=NAP1L1;-:200:-	2.51556	1.37653	3.42157e-13	5.22095e-12	9	17	16	34	24	21	148.422	257.92	186.372	1348.14	801.817	678.952
chr16:3760454:3760654:chr16:3740828-3767598;refseq_id=NM_016292,NM_001272049;ensg_id=ENSG00000126602;gsymbol=TRAP1;-:200:-	2.51141	0.0326531	2.93577e-07	1.59025e-06	7	3	5	11	7	11	115.439	45.5152	58.2411	436.162	233.863	355.642
chr1:207523282:207523482:chr1:207512742-207534311;refseq_id=NM_001114752,NM_000574;ensg_id=ENSG00000196352;gsymbol=CD55;+:200:+	2.50241	0.43457	2.16062e-10	2.14058e-09	5	7	9	14	12	14	82.4565	106.202	104.834	555.115	400.909	452.635
chr8:141931231:141931431:chr8:141900642-141935848;refseq_id=NM_153831,NM_001199649,NM_005607;ensg_id=ENSG00000169398;gsymbol=PTK2;-:200:-	2.50039	-0.143252	1.33695e-06	6.51881e-06	5	2	6	10	9	6	82.4565	30.3435	69.8893	396.511	300.682	193.986
chr18:192641:192841:chr18:180236-196767;refseq_id=NM_005151,NM_001037334;ensg_id=ENSG00000101557;gsymbol=USP14;+:200:+	2.49754	1.07307	3.34396e-14	5.71482e-13	12	8	14	21	25	18	197.896	121.374	163.075	832.672	835.227	581.959
chr22:27113902:27114102:chr22:27113216-27170180;refseq_id=NA;ensg_id=ENSG00000244625;gsymbol=CTA-211A9.5;+:200:+	2.49243	0.22966	4.55252e-08	2.88158e-07	4	5	9	10	8	16	65.9652	75.8587	104.834	396.511	267.272	517.297
chr6:30709481:30709568:chr6:30708967-30709644;refseq_id=NM_005803;ensg_id=ENSG00000137312;gsymbol=FLOT1;-:87:-	2.48821	-0.240232	1.32341e-06	6.47129e-06	2	4	6	5	8	10	32.9826	60.687	69.8893	198.255	267.272	323.311
chr16:68321025:68321225:chr16:68308594-68321774;refseq_id=NM_003983,NM_001076785;ensg_id=ENSG00000103064;gsymbol=SLC7A6;+:200:+	2.488	-0.237354	4.32746e-06	1.91597e-05	3	4	5	8	8	7	49.4739	60.687	58.2411	317.209	267.272	226.317
chr17:35937711:35937911:chr17:35936439-35939530;refseq_id=NM_007247,NM_198882,NM_001163544,NM_001163545,NM_080550,NM_001163546,NM_001163547;ensg_id=ENSG00000006114;gsymbol=SYNRG;-:200:-	2.48797	-0.237816	4.32746e-06	1.91597e-05	3	4	5	7	9	7	49.4739	60.687	58.2411	277.557	300.682	226.317
chr1:150476911:150477107:chr1:150476811-150477454;refseq_id=NM_025150,NR_073514,NM_001271895,NM_001271896,NM_001256402;ensg_id=ENSG00000143374;gsymbol=TARS2;+:196:+	2.4779	-0.447583	0.000129268	0.000440077	1	3	6	6	10	3	16.4913	45.5152	69.8893	237.906	334.091	96.9932
chr12:57883128:57883237:chr12:57883050-57884162;refseq_id=NM_004990;ensg_id=ENSG00000166986;gsymbol=MARS;+:109:+	2.47751	-0.337212	3.5194e-06	1.5828e-05	4	2	5	7	6	8	65.9652	30.3435	58.2411	277.557	200.454	258.649
chr7:43919385:43919585:chr7:43915501-43921296;refseq_id=NA;ensg_id=ENSG00000106608;gsymbol=URGCP;-:200:-	2.47634	-0.336592	1.19111e-05	4.88155e-05	3	4	4	7	10	4	49.4739	60.687	46.5929	277.557	334.091	129.324
chr7:150777009:150777209:chr7:150775929-150777970;refseq_id=NA;ensg_id=NA;gsymbol=NA;-:200:-	2.4732	0.272777	2.35273e-06	1.0941e-05	4	4	11	8	7	20	65.9652	60.687	128.13	317.209	233.863	646.621
chr15:72541655:72541855:chr15:72534961-72542433;refseq_id=NM_020214,NM_001258272,NM_001271876;ensg_id=ENSG00000137817;gsymbol=PARP6;-:200:-	2.47276	0.474296	6.70591e-10	5.90743e-09	8	4	10	13	17	11	131.93	60.687	116.482	515.464	567.954	355.642
chr19:18547915:18548115:chr19:18547140-18548570;refseq_id=NM_001253389,NM_001170938,NM_016368,NR_045573;ensg_id=ENSG00000105655;gsymbol=ISYNA1;-:200:-	2.46852	0.739881	4.24462e-12	5.4955e-11	9	7	11	14	17	19	148.422	106.202	128.13	555.115	567.954	614.29
chr16:14698083:14698283:chr16:14693761-14700383;refseq_id=NM_001134477,NM_002582,NM_001242992;ensg_id=ENSG00000140694;gsymbol=PARN;-:200:-	2.45972	-0.175596	8.19854e-05	0.000293124	3	4	6	9	3	12	49.4739	60.687	69.8893	356.86	100.227	387.973
chr12:51451588:51451788:chr12:51450133-51454207;refseq_id=NA;ensg_id=ENSG00000050426;gsymbol=LETMD1;+:200:+	2.457	0.280526	7.50766e-08	4.5418e-07	5	7	7	14	8	13	82.4565	106.202	81.5376	555.115	267.272	420.304
chr10:102283896:102284096:chr10:102276631-102286311;refseq_id=NM_005004;ensg_id=ENSG00000255339,ENSG00000075826,ENSG00000166136;gsymbol=NDUFB8,SEC31B;-:200:-	2.4569	0.69361	4.16801e-09	3.22314e-08	11	8	7	17	11	20	181.404	121.374	81.5376	674.068	367.5	646.621
chr15:73048788:73048988:chr15:73047897-73052868;refseq_id=NM_031284,NR_023319;ensg_id=ENSG00000159322;gsymbol=ADPGK;-:200:-	2.45112	0.34891	1.09149e-07	6.41014e-07	6	8	6	9	10	18	98.9479	121.374	69.8893	356.86	334.091	581.959
chr22:24043032:24043232:chr22:24036306-24047728;refseq_id=NR_024448;ensg_id=ENSG00000228315;gsymbol=GUSBP11;-:200:-	2.44471	-0.176172	4.06057e-06	1.80716e-05	3	4	6	8	5	11	49.4739	60.687	69.8893	317.209	167.045	355.642
chr2:27015423:27015623:chr2:27014999-27016194;refseq_id=NM_001809,NM_001042426;ensg_id=ENSG00000115163;gsymbol=CENPA;+:200:+	2.44097	-0.0816439	6.78147e-06	2.90465e-05	7	3	4	7	6	13	115.439	45.5152	46.5929	277.557	200.454	420.304
chr16:685774:685974:chr16:685281-686347;refseq_id=NM_001040162;ensg_id=ENSG00000130731;gsymbol=C16orf13;-:200:-	2.43423	0.250499	4.48305e-06	1.97717e-05	1	9	9	10	6	18	16.4913	136.546	104.834	396.511	200.454	581.959
chr1:52257333:52257533:chr1:52256572-52257770;refseq_id=NM_002525,NM_001101662,NM_001242361;ensg_id=ENSG00000078618;gsymbol=NRD1;-:200:-	2.43255	-0.680859	0.000441858	0.00132946	2	3	3	6	7	2	32.9826	45.5152	34.9447	237.906	233.863	64.6621
chr3:32805746:32805946:chr3:32804225-32806301;refseq_id=NM_015442,NM_001256741,NR_046352,NM_001256742;ensg_id=ENSG00000182973;gsymbol=CNOT10;+:200:+	2.43237	0.132754	7.19259e-08	4.37443e-07	5	5	7	12	10	9	82.4565	75.8587	81.5376	475.813	334.091	290.98
chr3:130613374:130613574:chr3:130612835-130649370;refseq_id=NM_001199182,NM_001199181,NM_001199180,NM_001199184,NM_001199179;ensg_id=ENSG00000017260;gsymbol=ATP2C1;+:200:+	2.4301	-0.275677	3.35044e-06	1.52082e-05	2	2	8	8	6	8	32.9826	30.3435	93.1858	317.209	200.454	258.649
chr12:6658650:6658850:chr12:6657834-6659062;refseq_id=NM_001039670,NR_036467,NM_001193457,NM_080730;ensg_id=ENSG00000010295;gsymbol=IFFO1;-:200:-	2.42663	-0.555767	0.000416859	0.00126136	5	2	2	2	7	8	82.4565	30.3435	23.2964	79.3021	233.863	258.649
chr17:59465778:59465978:chr17:59457867-59470199;refseq_id=NM_001099432;ensg_id=ENSG00000141376;gsymbol=BCAS3;+:200:+	2.42071	-0.271096	1.53313e-05	6.16497e-05	3	5	4	4	8	10	49.4739	75.8587	46.5929	158.604	267.272	323.311
chr17:47014295:47014381:chr17:47013532-47014486;refseq_id=NM_007241;ensg_id=ENSG00000159210;gsymbol=SNF8;-:86:-	2.41845	-0.0296686	2.95809e-06	1.35533e-05	4	4	7	9	5	13	65.9652	60.687	81.5376	356.86	167.045	420.304
chr7:100480185:100480385:chr7:100479674-100481860;refseq_id=NM_001128852,NM_015908,NM_001128854,NM_001128853;ensg_id=ENSG00000087087;gsymbol=SRRT;+:200:+	2.4128	2.73866	5.62975e-25	2.34664e-23	29	37	43	51	58	83	478.248	561.355	500.874	2022.2	1937.73	2683.48
chr12:112147876:112148076:chr12:112147330-112150461;refseq_id=NM_025247,NM_001136538;ensg_id=ENSG00000111271;gsymbol=ACAD10;+:200:+	2.41127	-0.375322	1.6997e-05	6.77896e-05	2	3	6	7	5	8	32.9826	45.5152	69.8893	277.557	167.045	258.649
chr22:45573918:45574118:chr22:45571775-45577248;refseq_id=NM_007172,NM_153645;ensg_id=ENSG00000093000;gsymbol=NUP50;+:200:+	2.40874	-0.0298972	5.54511e-07	2.90248e-06	4	4	7	9	7	11	65.9652	60.687	81.5376	356.86	233.863	355.642
chr17:18157033:18157233:chr17:18156615-18157496;refseq_id=NM_001256264,NM_002018,NM_001256265;ensg_id=ENSG00000177731;gsymbol=FLII;-:200:-	2.4068	0.177609	6.10593e-08	3.75361e-07	3	5	10	13	10	9	49.4739	75.8587	116.482	515.464	334.091	290.98
chr10:65024524:65024724:chr10:64976967-65028982;refseq_id=NM_004241,NM_032776;ensg_id=ENSG00000171988;gsymbol=JMJD1C;-:200:-	2.40356	0.642308	1.42836e-10	1.46611e-09	6	7	13	10	16	20	98.9479	106.202	151.427	396.511	534.545	646.621
chr1:33097946:33098146:chr1:33097428-33099328;refseq_id=NM_178547;ensg_id=ENSG00000176261;gsymbol=ZBTB8OS;-:200:-	2.39915	0.432711	5.44089e-09	4.13265e-08	8	6	8	11	11	17	131.93	91.0305	93.1858	436.162	367.5	549.628
chr3:119196980:119197180:chr3:119196160-119199019;refseq_id=NR_024265,NM_152305;ensg_id=ENSG00000163389;gsymbol=POGLUT1;+:200:+	2.39544	-0.371456	0.000115982	0.000399623	5	3	3	3	8	9	82.4565	45.5152	34.9447	118.953	267.272	290.98
chr22:29927099:29927299:chr22:29925151-29927952;refseq_id=NM_003678,NM_001002879,NM_001002878,NM_001002877;ensg_id=ENSG00000100296,ENSG00000234208;gsymbol=THOC5,CTA-256D12.11;-:200:-	2.39097	-0.315729	0.000558907	0.00163417	2	0	10	2	11	8	32.9826	0	116.482	79.3021	367.5	258.649
chr16:29936902:29937102:chr16:29934511-29937545;refseq_id=NM_178863;ensg_id=ENSG00000174943;gsymbol=KCTD13;-:200:-	2.38453	0.0991632	1.92691e-06	9.10197e-06	3	5	9	5	16	9	49.4739	75.8587	104.834	198.255	534.545	290.98
chr4:164436264:164436464:chr4:164435226-164438628;refseq_id=NM_018352;ensg_id=ENSG00000198498;gsymbol=TMA16;+:200:+	2.37895	-0.205065	2.21436e-05	8.62035e-05	4	5	4	10	8	5	65.9652	75.8587	46.5929	396.511	267.272	161.655
chr22:18276560:18276760:chr22:18273968-18291703;refseq_id=NM_015241;ensg_id=ENSG00000093100,ENSG00000243156;gsymbol=XXbac-B461K10.4,MICAL3;-:200:-	2.37742	-0.205335	8.50541e-06	3.59351e-05	6	3	4	7	8	8	98.9479	45.5152	46.5929	277.557	267.272	258.649
chr13:45918263:45918463:chr13:45915554-45944317;refseq_id=NR_024458;ensg_id=ENSG00000170919;gsymbol=TPT1-AS1;+:200:+	2.37117	0.0272921	7.36279e-07	3.79006e-06	6	4	6	11	9	8	98.9479	60.687	69.8893	436.162	300.682	258.649
chr12:54067596:54067796:chr12:54066360-54070512;refseq_id=NM_001002031;ensg_id=ENSG00000135390;gsymbol=ATP5G2;-:200:-	2.36583	-0.208941	8.03074e-05	0.000287726	4	4	5	3	8	12	65.9652	60.687	58.2411	118.953	267.272	387.973
chr3:10329428:10329628:chr3:10327432-10335133;refseq_id=NA;ensg_id=NA;gsymbol=NA;+:200:+	2.3627	0.848186	2.50282e-11	2.89988e-10	8	7	16	16	15	22	131.93	106.202	186.372	634.417	501.136	711.284
chr12:58145125:58145282:chr12:58144706-58145519;refseq_id=NM_000075;ensg_id=ENSG00000135446;gsymbol=CDK4;-:157:-	2.35591	-0.304214	2.18487e-05	8.53473e-05	1	8	3	6	8	7	16.4913	121.374	34.9447	237.906	267.272	226.317
chr2:148602442:148602642:chr2:148602086-148654077;refseq_id=NM_001616;ensg_id=ENSG00000121989;gsymbol=ACVR2A;+:200:+	2.35494	-0.30291	0.000413896	0.00125639	2	7	3	7	3	11	32.9826	106.202	34.9447	277.557	100.227	355.642
chr3:10323622:10323822:chr3:10322637-10325287;refseq_id=NA;ensg_id=ENSG00000157014;gsymbol=TATDN2;+:200:+	2.35007	1.20517	2.93311e-12	3.93151e-11	12	15	13	21	17	30	197.896	227.576	151.427	832.672	567.954	969.932
chr6:135348001:135348201:chr6:135323872-135348333;refseq_id=NM_001204265,NM_001145158,NM_006620;ensg_id=ENSG00000112339;gsymbol=HBS1L;-:200:-	2.34952	0.512601	1.44938e-09	1.21124e-08	8	8	8	10	15	16	131.93	121.374	93.1858	396.511	501.136	517.297
chr19:49458604:49458804:chr19:49458117-49459590;refseq_id=NR_027882,NM_138764;ensg_id=ENSG00000087088;gsymbol=BAX;+:200:+	2.33733	0.273738	1.63076e-08	1.15402e-07	4	8	8	10	11	13	65.9652	121.374	93.1858	396.511	367.5	420.304
chr11:10828866:10829066:chr11:10828367-10830582;refseq_id=NM_001418,NM_001042559;ensg_id=ENSG00000110321;gsymbol=EIF4G2;-:200:-	2.33063	2.5199	1.19141e-13	1.8853e-12	30	19	52	58	38	67	494.739	288.263	605.708	2299.76	1269.54	2166.18
chr1:29063969:29064169:chr1:29063559-29064850;refseq_id=NM_001173128,NM_016258,NM_001172828;ensg_id=ENSG00000198492;gsymbol=YTHDF2;+:200:+	2.33061	1.40784	1.03108e-14	1.89475e-13	14	12	21	30	24	24	230.878	182.061	244.613	1189.53	801.817	775.946
chr2:74685798:74685958:chr2:74685527-74686872;refseq_id=NM_031288,NM_012477;ensg_id=ENSG00000115274,ENSG00000239779;gsymbol=INO80B,WBP1;+:160:+	2.32259	0.198475	2.42301e-07	1.34227e-06	6	3	10	7	15	10	98.9479	45.5152	116.482	277.557	501.136	323.311
chr1:155279343:155279543:chr1:155278539-155279996;refseq_id=NM_001242824,NM_001135822,NM_001242825;ensg_id=ENSG00000160752;gsymbol=FDPS;+:200:+	2.32028	-0.240748	0.00055203	0.00161683	3	5	5	6	2	14	49.4739	75.8587	58.2411	237.906	66.8181	452.635
chr1:39893432:39893632:chr1:39893127-39894998;refseq_id=NM_152486,NM_012090;ensg_id=ENSG00000127603;gsymbol=MACF1;+:200:+	2.31832	1.67839	7.03597e-19	1.86426e-17	12	19	26	30	31	33	197.896	288.263	302.854	1189.53	1035.68	1066.93
chr1:151214398:151214598:chr1:151212431-151215043;refseq_id=NM_001135638,NM_003557,NM_001135636,NM_001135637;ensg_id=ENSG00000143398;gsymbol=PIP5K1A;+:200:+	2.31822	0.640676	1.45226e-08	1.04064e-07	6	9	12	10	13	22	98.9479	136.546	139.779	396.511	434.318	711.284
chr19:12769324:12769524:chr19:12769038-12772190;refseq_id=NM_001173498,NM_000528;ensg_id=ENSG00000104774;gsymbol=MAN2B1;-:200:-	2.31402	0.20313	7.77938e-07	3.9865e-06	7	5	7	6	10	16	115.439	75.8587	81.5376	237.906	334.091	517.297
chr19:12769321:12769521:chr19:12769038-12772190;refseq_id=NM_001173498,NM_000528;ensg_id=ENSG00000104774;gsymbol=MAN2B1;-:200:-	2.314	0.20313	7.83067e-07	4.00677e-06	7	5	7	6	10	16	115.439	75.8587	81.5376	237.906	334.091	517.297
chr6:32939171:32939371:chr6:32936942-32942542;refseq_id=NM_005104;ensg_id=ENSG00000204256;gsymbol=BRD2;+:200:+	2.31395	-0.244591	7.54343e-06	3.21489e-05	2	4	7	6	7	9	32.9826	60.687	81.5376	237.906	233.863	290.98
chr15:101826498:101826698:chr15:101825931-101827215;refseq_id=NM_003090;ensg_id=ENSG00000131876;gsymbol=SNRPA1;-:200:-	2.31227	1.87972	3.00465e-19	8.15072e-18	18	25	22	37	37	33	296.844	379.294	256.261	1467.09	1236.14	1066.93
chr1:235316080:235316280:chr1:235311719-235318427;refseq_id=NM_015014,NR_027762,NM_001161533,NM_031371;ensg_id=ENSG00000188739,ENSG00000054267;gsymbol=RBM34,ARID4B;-:200:-	2.30273	0.338171	3.22458e-05	0.000122755	7	3	12	19	11	5	115.439	45.5152	139.779	753.37	367.5	161.655
chr19:14277842:14278042:chr19:14273418-14281603;refseq_id=NM_001008701,NM_014921;ensg_id=ENSG00000072071;gsymbol=LPHN1;-:200:-	2.30218	1.93042	6.86908e-18	1.73915e-16	23	15	30	29	35	47	379.3	227.576	349.447	1149.88	1169.32	1519.56
chr20:30136631:30136831:chr20:30132750-30137924;refseq_id=NM_178581,NM_030789,NM_178580;ensg_id=ENSG00000101294;gsymbol=HM13;+:200:+	2.30111	-0.0938932	4.4162e-06	1.9502e-05	5	1	9	5	9	11	82.4565	15.1717	104.834	198.255	300.682	355.642
chr5:169014064:169014264:chr5:169010638-169015579;refseq_id=NM_017785;ensg_id=ENSG00000040275;gsymbol=SPDL1;+:200:+	2.30081	1.39212	4.82456e-09	3.7057e-08	18	13	16	38	19	19	296.844	197.233	186.372	1506.74	634.772	614.29
chr17:7828501:7828701:chr17:7827733-7829044;refseq_id=NM_004732;ensg_id=ENSG00000170049;gsymbol=KCNAB3;-:200:-	2.29945	0.00350376	0.000211021	0.000689551	7	6	3	10	3	14	115.439	91.0305	34.9447	396.511	100.227	452.635
chr7:64280397:64280597:chr7:64275954-64294059;refseq_id=NA;ensg_id=NA;gsymbol=NA;+:200:+	2.29466	0.929185	1.96223e-09	1.60308e-08	12	7	15	22	12	21	197.896	106.202	174.723	872.324	400.909	678.952
chr13:45603173:45603373:chr13:45601920-45607743;refseq_id=NA;ensg_id=NA;gsymbol=NA;+:200:+	2.29449	0.246299	4.85167e-08	3.04275e-07	3	8	9	8	14	11	49.4739	121.374	104.834	317.209	467.727	355.642
chr1:237519064:237519264:chr1:237494178-237527672;refseq_id=NM_001035;ensg_id=ENSG00000198626;gsymbol=RYR2;+:200:+	2.28864	-0.342749	4.97488e-05	0.000184627	4	2	6	6	9	5	65.9652	30.3435	69.8893	237.906	300.682	161.655
chr19:41811350:41811550:chr19:41809877-41813811;refseq_id=NA;ensg_id=NA;gsymbol=NA;+:200:+	2.2863	0.0511593	6.3965e-07	3.33281e-06	7	4	6	7	9	12	115.439	60.687	69.8893	277.557	300.682	387.973
chr10:103919789:103919989:chr10:103919653-103920850;refseq_id=NM_004741;ensg_id=ENSG00000166197;gsymbol=NOLC1;+:200:+	2.28075	0.359242	1.49773e-07	8.69144e-07	7	5	10	6	14	16	115.439	75.8587	116.482	237.906	467.727	517.297
chr17:3626677:3626877:chr17:3623601-3627038;refseq_id=NM_002208;ensg_id=ENSG00000083457;gsymbol=ITGAE;-:200:-	2.27793	0.370836	1.75414e-07	9.95955e-07	9	9	4	13	10	13	148.422	136.546	46.5929	515.464	334.091	420.304
chr12:6658647:6658847:chr12:6657834-6659062;refseq_id=NM_001039670,NR_036467,NM_001193457,NM_080730;ensg_id=ENSG00000010295;gsymbol=IFFO1;-:200:-	2.27559	-0.518487	0.00140407	0.00371449	6	2	2	2	7	8	98.9479	30.3435	23.2964	79.3021	233.863	258.649
chr1:33487062:33487193:chr1:33480123-33487304;refseq_id=NR_037591,NM_001199199,NM_013411,NR_037592,NM_001625;ensg_id=ENSG00000004455;gsymbol=AK2;-:131:-	2.27502	0.36663	1.06217e-06	5.29226e-06	7	9	6	10	8	18	115.439	136.546	69.8893	396.511	267.272	581.959
chr10:1041668:1041868:chr10:1038429-1042182;refseq_id=NM_012341;ensg_id=ENSG00000107937;gsymbol=GTPBP4;+:200:+	2.27429	-0.180427	1.61791e-05	6.46857e-05	4	4	6	5	7	11	65.9652	60.687	69.8893	198.255	233.863	355.642
chr15:75644251:75644451:chr15:75641225-75644728;refseq_id=NM_024608,NR_073137,NM_001256552;ensg_id=ENSG00000140398;gsymbol=NEIL1;+:200:+	2.27097	0.17771	9.92736e-06	4.12293e-05	6	6	7	7	7	17	98.9479	91.0305	81.5376	277.557	233.863	549.628
chr17:7481237:7481437:chr17:7481145-7482324;refseq_id=NA;ensg_id=ENSG00000264772;gsymbol=RP11-186B7.4;+:200:+	2.25693	2.67119	6.87248e-27	3.30847e-25	35	43	34	52	59	67	577.196	652.385	396.04	2061.86	1971.13	2166.18
chr19:35997567:35997767:chr19:35997028-36000863;refseq_id=NM_001126056,NM_001190347,NM_033317,NM_001126059,NM_001035516,NM_001190348,NM_001126057,NM_001126058,NM_001190349;ensg_id=ENSG00000161249;gsymbol=DMKN;-:200:-	2.2568	0.102641	7.04957e-07	3.6453e-06	7	4	7	10	9	10	115.439	60.687	81.5376	396.511	300.682	323.311
chr20:57244157:57244357:chr20:57243043-57245659;refseq_id=NM_003763,NR_037943,NM_001134773,NR_037941,NM_001204868,NM_001001433,NR_037942,NM_001134772;ensg_id=ENSG00000124222,ENSG00000270044,ENSG00000254995;gsymbol=STX16,STX16-NPEPL1;+:200:+	2.25649	-0.313044	0.00223182	0.00561735	1	4	8	9	1	10	16.4913	60.687	93.1858	356.86	33.4091	323.311
chr19:40788211:40788411:chr19:40771129-40790861;refseq_id=NM_001243028,NM_001626,NM_001243027;ensg_id=ENSG00000105221;gsymbol=AKT2;-:200:-	2.25501	-0.449009	0.000330515	0.00103263	4	2	5	3	7	8	65.9652	30.3435	58.2411	118.953	233.863	258.649
chr11:47521156:47521356:chr11:47510389-47522484;refseq_id=NM_001025596;ensg_id=ENSG00000149187;gsymbol=CELF1;-:200:-	2.25002	-0.280271	2.40875e-05	9.30295e-05	3	2	8	4	8	9	49.4739	30.3435	93.1858	158.604	267.272	290.98
chr7:99159310:99159510:chr7:99158156-99169415;refseq_id=NM_001083956,NM_138494,NM_001085368,NM_001009960;ensg_id=ENSG00000197343;gsymbol=ZNF655;+:200:+	2.24233	0.26059	1.84268e-07	1.04276e-06	2	4	15	11	12	10	32.9826	60.687	174.723	436.162	400.909	323.311
chr3:66449465:66449665:chr3:66448536-66455702;refseq_id=NM_015541;ensg_id=ENSG00000144749;gsymbol=LRIG1;-:200:-	2.24003	-0.121741	5.12096e-06	2.22974e-05	4	4	7	7	11	6	65.9652	60.687	81.5376	277.557	367.5	193.986
chr11:67374636:67374836:chr11:67374429-67375949;refseq_id=NM_001166102,NM_007103;ensg_id=ENSG00000167792;gsymbol=NDUFV1;+:200:+	2.23744	0.33814	5.52582e-07	2.89682e-06	6	8	8	6	14	15	98.9479	121.374	93.1858	237.906	467.727	484.966
chr3:50144297:50144450:chr3:50144200-50145002;refseq_id=NM_005778,NR_036627;ensg_id=ENSG00000003756;gsymbol=RBM5;+:153:+	2.23454	-0.117261	2.76353e-05	0.000106132	8	2	5	6	7	11	131.93	30.3435	58.2411	237.906	233.863	355.642
chr17:8526815:8527015:chr17:8526220-8534079;refseq_id=NM_001256012,NM_001256095,NM_005964;ensg_id=ENSG00000133026;gsymbol=MYH10;-:200:-	2.2341	0.027339	3.37848e-06	1.52949e-05	7	7	3	8	10	9	115.439	106.202	34.9447	317.209	334.091	290.98
chr10:103553501:103553701:chr10:103552596-103557911;refseq_id=NM_001142434,NM_012215;ensg_id=ENSG00000198408;gsymbol=MGEA5;-:200:-	2.23373	2.8409	2.49179e-27	1.25249e-25	50	29	48	59	68	71	824.565	439.981	559.115	2339.41	2271.82	2295.51
chr2:223509284:223509484:chr2:223507570-223513514;refseq_id=NM_005687;ensg_id=ENSG00000116120;gsymbol=FARSB;-:200:-	2.23055	1.15192	9.93667e-13	1.42107e-11	8	17	16	17	23	24	131.93	257.92	186.372	674.068	768.408	775.946
chr17:39975927:39976092:chr17:39975782-39976713;refseq_id=NM_021939;ensg_id=ENSG00000141756;gsymbol=FKBP10;+:165:+	2.22966	0.151586	4.15297e-07	2.21449e-06	6	6	7	8	10	12	98.9479	91.0305	81.5376	317.209	334.091	387.973
chr3:184035304:184035504:chr3:184033920-184037589;refseq_id=NM_198242,NM_001194946,NM_001194947,NM_198241,NM_198244,NM_182917;ensg_id=ENSG00000114867,ENSG00000145191;gsymbol=EIF4G1,EIF2B5;+:200:+	2.22598	0.269841	1.57059e-07	9.06806e-07	7	5	9	9	11	13	115.439	75.8587	104.834	356.86	367.5	420.304
chr3:119177087:119177287:chr3:119156602-119180995;refseq_id=NM_018266,NR_073506;ensg_id=ENSG00000176142;gsymbol=TMEM39A;-:200:-	2.22495	-0.214463	0.000114527	0.000395807	2	5	7	6	4	12	32.9826	75.8587	81.5376	237.906	133.636	387.973
chr9:86281348:86281548:chr9:86279945-86284242;refseq_id=NM_013438,NM_053067;ensg_id=ENSG00000135018;gsymbol=UBQLN1;-:200:-	2.22105	0.451315	4.62819e-06	2.0307e-05	9	9	6	10	8	20	148.422	136.546	69.8893	396.511	267.272	646.621
chr5:179674728:179674928:chr5:179674439-179676138;refseq_id=NM_002752,NM_139068,NM_139069,NM_139070,NM_001135044;ensg_id=ENSG00000050748;gsymbol=MAPK9;-:200:-	2.22026	0.072626	3.21271e-05	0.000122556	7	2	9	9	5	14	115.439	30.3435	104.834	356.86	167.045	452.635
chr19:37825901:37826101:chr19:37825580-37838218;refseq_id=NM_181786;ensg_id=ENSG00000181666;gsymbol=HKR1;+:200:+	2.22025	0.489336	2.5646e-06	1.18334e-05	10	6	9	13	7	19	164.913	91.0305	104.834	515.464	233.863	614.29
chr6:130370700:130370900:chr6:130370427-130372553;refseq_id=NM_032438,NM_001007102;ensg_id=ENSG00000198945,ENSG00000260527;gsymbol=L3MBTL3,RP11-73O6.4;+:200:+	2.20856	-0.0634661	9.12539e-06	3.81303e-05	6	3	7	6	9	10	98.9479	45.5152	81.5376	237.906	300.682	323.311
chr17:7123722:7123922:chr17:7123441-7124149;refseq_id=NM_001270447,NM_000018,NM_001033859,NM_001270448;ensg_id=ENSG00000072778;gsymbol=ACADVL;+:200:+	2.20647	0.072131	2.01097e-06	9.46765e-06	6	4	8	7	12	9	98.9479	60.687	93.1858	277.557	400.909	290.98
chr9:86281309:86281509:chr9:86279945-86284242;refseq_id=NM_013438,NM_053067;ensg_id=ENSG00000135018;gsymbol=UBQLN1;-:200:-	2.20638	0.386051	4.38299e-06	1.93804e-05	7	10	6	9	8	19	115.439	151.717	69.8893	356.86	267.272	614.29
chr5:137665336:137665536:chr5:137664173-137666907;refseq_id=NM_001790,NM_022809;ensg_id=ENSG00000158402;gsymbol=CDC25C;-:200:-	2.20368	0.198208	1.78631e-06	8.48001e-06	5	7	8	9	15	7	82.4565	106.202	93.1858	356.86	501.136	226.317
chr2:219611552:219611752:chr2:219610878-219612095;refseq_id=NM_014640;ensg_id=ENSG00000135912;gsymbol=TTLL4;+:200:+	2.20336	0.315267	5.45812e-08	3.39197e-07	5	9	8	9	13	12	82.4565	136.546	93.1858	356.86	434.318	387.973
chr1:145290580:145290780:chr1:145290429-145293580;refseq_id=NM_203458,NM_001037675,NM_001037501;ensg_id=ENSG00000255168,ENSG00000163386;gsymbol=RP11-458D21.5,NBPF10;+:200:+	2.20226	0.420588	2.08125e-08	1.42559e-07	6	7	11	9	13	15	98.9479	106.202	128.13	356.86	434.318	484.966
chr17:5329402:5329555:chr17:5329291-5331531;refseq_id=NM_001160266,NM_001160244,NM_001160246,NM_001033002,NR_027683,NM_001160243,NR_027679;ensg_id=ENSG00000129197;gsymbol=RPAIN;+:153:+	2.19781	1.02881	2.11625e-11	2.46871e-10	10	14	14	20	21	17	164.913	212.404	163.075	793.021	701.59	549.628
chr10:27512168:27512266:chr10:27508652-27512381;refseq_id=NM_001042473,NR_024150,NR_073195,NM_145698,NM_001271512,NR_073197,NR_073196;ensg_id=ENSG00000107897;gsymbol=ACBD5;-:98:-	2.19177	0.832218	1.04224e-08	7.59565e-08	11	10	12	22	15	13	181.404	151.717	139.779	872.324	501.136	420.304
chr12:54358067:54358267:chr12:54356092-54359871;refseq_id=NR_003716,NM_001276504,NM_001276503;ensg_id=ENSG00000228630;gsymbol=HOTAIR;-:200:-	2.18549	0.744713	2.88948e-09	2.2968e-08	11	7	13	15	13	19	181.404	106.202	151.427	594.766	434.318	614.29
chr5:68662422:68662622:chr5:68651722-68665409;refseq_id=NM_001015891;ensg_id=ENSG00000085231;gsymbol=TAF9;-:200:-	2.18156	1.05496	2.23211e-11	2.59502e-10	15	9	15	14	23	22	247.37	136.546	174.723	555.115	768.408	711.284
chr16:30732309:30732509:chr16:30732034-30733607;refseq_id=NM_006662;ensg_id=ENSG00000080603;gsymbol=SRCAP;+:200:+	2.18113	-0.155533	1.20055e-05	4.90846e-05	1	6	8	6	7	10	16.4913	91.0305	93.1858	237.906	233.863	323.311
chr1:61742991:61743191:chr1:61553821-61798258;refseq_id=NM_001145511,NM_001145512,NM_001134673,NM_005595;ensg_id=ENSG00000162599;gsymbol=NFIA;+:200:+	2.1811	0.12076	1.1927e-06	5.9082e-06	4	6	9	6	11	12	65.9652	91.0305	104.834	237.906	367.5	387.973
chr10:99198460:99198660:chr10:99197457-99201016;refseq_id=NM_016046;ensg_id=ENSG00000171311;gsymbol=EXOSC1;-:200:-	2.1808	0.858199	3.25327e-09	2.56805e-08	4	16	14	19	15	17	65.9652	242.748	163.075	753.37	501.136	549.628
chr10:99228861:99229061:chr10:99228009-99229480;refseq_id=NM_022362;ensg_id=ENSG00000155229;gsymbol=MMS19;-:200:-	2.18023	-0.0102066	3.18603e-06	1.45198e-05	3	6	8	7	10	9	49.4739	91.0305	93.1858	277.557	334.091	290.98
chr5:174952594:174952794:chr5:174949378-174955621;refseq_id=NM_022754;ensg_id=ENSG00000164466;gsymbol=SFXN1;+:200:+	2.18016	-0.0058164	3.18603e-06	1.45198e-05	6	5	6	8	9	9	98.9479	75.8587	69.8893	317.209	300.682	290.98
chr13:96283067:96283267:chr13:96282243-96285575;refseq_id=NM_014934,NM_198968;ensg_id=ENSG00000134874;gsymbol=DZIP1;-:200:-	2.17619	1.63596	2.41086e-13	3.72865e-12	21	15	23	34	25	29	346.317	227.576	267.909	1348.14	835.227	937.601
chr17:40814790:40814990:chr17:40812657-40815521;refseq_id=NM_016437;ensg_id=ENSG00000037042;gsymbol=TUBG2;+:200:+	2.17588	-0.00380545	1.44959e-05	5.84279e-05	7	6	4	5	10	11	115.439	91.0305	46.5929	198.255	334.091	355.642
chr17:59861268:59861468:chr17:59858201-59861785;refseq_id=NM_032043;ensg_id=ENSG00000136492;gsymbol=BRIP1;-:200:-	2.17232	-0.310377	0.000255097	0.000815642	4	4	5	3	8	9	65.9652	60.687	58.2411	118.953	267.272	290.98
chr12:21810148:21810348:chr12:21807477-21810789;refseq_id=NA;ensg_id=ENSG00000111716;gsymbol=LDHB;-:200:-	2.16326	0.398431	3.89749e-08	2.48538e-07	8	4	12	11	11	14	131.93	60.687	139.779	436.162	367.5	452.635
chr12:69229408:69229608:chr12:69202988-69239212;refseq_id=NM_002392;ensg_id=ENSG00000135679;gsymbol=MDM2;+:200:+	2.1559	1.11131	8.44635e-11	8.93796e-10	14	13	14	15	19	27	230.878	197.233	163.075	594.766	634.772	872.939
chr9:123220900:123221100:chr9:123210173-123230275;refseq_id=NM_001272039,NM_018249,NR_073556,NR_073554,NR_073555,NR_073558,NR_073557,NM_001011649;ensg_id=ENSG00000136861;gsymbol=CDK5RAP2;-:200:-	2.15531	0.129491	1.61809e-05	6.46857e-05	10	5	4	5	11	13	164.913	75.8587	46.5929	198.255	367.5	420.304
chr17:28483357:28483557:chr17:28445098-28499616;refseq_id=NM_032141,NM_001261467;ensg_id=ENSG00000126653;gsymbol=NSRP1;+:200:+	2.15221	1.78701	1.57117e-13	2.45217e-12	23	19	24	35	25	37	379.3	288.263	279.557	1387.79	835.227	1196.25
chr7:66041916:66042116:chr7:66038372-66057371;refseq_id=NA;ensg_id=ENSG00000232559;gsymbol=GS1-124K5.12;-:200:-	2.151	0.400812	1.283e-06	6.30977e-06	6	10	8	6	14	16	98.9479	151.717	93.1858	237.906	467.727	517.297
chr7:66041919:66042119:chr7:66038372-66057371;refseq_id=NA;ensg_id=ENSG00000232559;gsymbol=GS1-124K5.12;-:200:-	2.15099	0.400812	1.28693e-06	6.32002e-06	6	10	8	6	14	16	98.9479	151.717	93.1858	237.906	467.727	517.297
chr1:62190097:62190297:chr1:62189385-62190816;refseq_id=NM_032027;ensg_id=ENSG00000162604;gsymbol=TM2D1;-:200:-	2.15012	-0.0925739	1.53519e-05	6.16602e-05	4	6	6	7	8	9	65.9652	91.0305	69.8893	277.557	267.272	290.98
chr17:5329355:5329555:chr17:5326089-5331531;refseq_id=NM_001160266,NM_001160244,NM_001160246,NM_001033002,NR_027683,NM_001160243,NR_027679;ensg_id=ENSG00000129197;gsymbol=RPAIN;+:200:+	2.14931	1.06829	2.64558e-11	3.05494e-10	11	14	15	20	22	17	181.404	212.404	174.723	793.021	734.999	549.628
chr2:178082232:178082432:chr2:178081588-178083887;refseq_id=NM_194247;ensg_id=ENSG00000170144;gsymbol=HNRNPA3;+:200:+	2.14463	-0.242084	4.18097e-05	0.000157559	6	4	4	6	7	8	98.9479	60.687	46.5929	237.906	233.863	258.649
chr12:110834257:110834457:chr12:110832906-110841535;refseq_id=NM_016238,NM_001137664;ensg_id=ENSG00000258210,ENSG00000196510;gsymbol=RP11-478C19.2,ANAPC7;-:200:-	2.14139	1.02269	9.03568e-10	7.79898e-09	11	11	17	18	14	25	181.404	166.889	198.02	713.719	467.727	808.277
chr15:91303010:91303210:chr15:91298041-91304485;refseq_id=NM_000057;ensg_id=ENSG00000197299;gsymbol=BLM;+:200:+	2.14088	0.33481	1.67287e-07	9.56163e-07	4	10	9	11	12	11	65.9652	151.717	104.834	436.162	400.909	355.642
chr2:204261406:204261606:chr2:204260379-204267457;refseq_id=NM_005759;ensg_id=ENSG00000138443;gsymbol=ABI2;+:200:+	2.14083	0.332923	1.67287e-07	9.56163e-07	6	7	10	8	14	12	98.9479	106.202	116.482	317.209	467.727	387.973
chr3:37114373:37114573:chr3:37107715-37116607;refseq_id=NM_017724,NM_006309,NM_001134369;ensg_id=ENSG00000093167;gsymbol=LRRFIP2;-:200:-	2.13079	0.098587	2.01097e-06	9.46765e-06	6	6	7	9	9	10	98.9479	91.0305	81.5376	356.86	300.682	323.311
chr17:17163788:17163988:chr17:17158173-17165420;refseq_id=NM_001199125,NM_003653;ensg_id=ENSG00000141030;gsymbol=COPS3;-:200:-	2.13022	0.0995583	1.75111e-05	6.97585e-05	4	9	6	9	6	13	65.9652	136.546	69.8893	356.86	200.454	420.304
chr11:57505935:57506135:chr11:57505080-57506732;refseq_id=NM_001144012,NR_037645,NM_015959,NR_026593;ensg_id=ENSG00000213593,ENSG00000254462;gsymbol=TMX2,TMX2-CTNND1;+:200:+	2.1296	-0.03485	8.8631e-05	0.000313928	4	7	6	9	4	12	65.9652	106.202	69.8893	356.86	133.636	387.973
chr1:36690371:36690571:chr1:36690017-36725085;refseq_id=NM_005119;ensg_id=ENSG00000054118;gsymbol=THRAP3;+:200:+	2.12112	-0.126856	0.000128299	0.000437214	2	5	9	10	4	9	32.9826	75.8587	104.834	396.511	133.636	290.98
chr12:54106630:54106830:chr12:54104902-54106990;refseq_id=NA;ensg_id=NA;gsymbol=NA;-:200:-	2.12102	0.0997175	9.12811e-05	0.00032298	6	7	6	7	5	16	98.9479	106.202	69.8893	277.557	167.045	517.297
chr1:23660124:23660324:chr1:23650049-23664354;refseq_id=NM_001102397,NM_001102399,NM_001102398,NM_005826;ensg_id=ENSG00000125944;gsymbol=HNRNPR;-:200:-	2.11962	2.13298	5.24064e-15	1.00632e-13	26	24	35	34	33	55	428.774	364.122	407.688	1348.14	1102.5	1778.21
chr12:6787876:6788076:chr12:6787293-6788349;refseq_id=NM_133476,NM_001039920,NM_001135734;ensg_id=ENSG00000126746;gsymbol=ZNF384;-:200:-	2.11767	0.37886	6.13361e-07	3.20072e-06	7	9	8	7	13	15	115.439	136.546	93.1858	277.557	434.318	484.966
chrX:153279729:153279929:chrX:153278494-153281548;refseq_id=NM_001025242,NM_001569,NM_001025243;ensg_id=ENSG00000184216;gsymbol=IRAK1;-:200:-	2.1084	-0.130376	0.000123984	0.000422933	5	0	11	7	11	5	82.4565	0	128.13	277.557	367.5	161.655
chr11:3009356:3009556:chr11:3004976-3010501;refseq_id=NM_005969;ensg_id=ENSG00000205531;gsymbol=NAP1L4;-:200:-	2.10659	0.237753	2.34316e-05	9.08039e-05	5	4	13	13	6	12	82.4565	60.687	151.427	515.464	200.454	387.973
chr11:57558765:57558965:chr11:57529234-57563201;refseq_id=NM_001206890,NM_001085466,NM_001206889,NM_001085460,NM_001206888,NM_001085462,NM_001085467,NM_001085468,NM_001085469,NM_001206885,NM_001206884,NM_001206891,NM_001085461,NM_001331,NM_001206887,NM_001085465;ensg_id=ENSG00000198561;gsymbol=CTNND1;+:200:+	2.10645	0.0145968	1.67248e-05	6.67818e-05	3	6	9	8	6	12	49.4739	91.0305	104.834	317.209	200.454	387.973
chr12:48528873:48529073:chr12:48528726-48531629;refseq_id=NM_001166686,NM_001166688,NM_000289,NM_001166687;ensg_id=ENSG00000152556;gsymbol=PFKM;+:200:+	2.10042	0.0126399	3.18603e-06	1.45198e-05	3	5	10	8	11	7	49.4739	75.8587	116.482	317.209	367.5	226.317
chr7:102184108:102184308:chr7:102181948-102185223;refseq_id=NM_001097615,NM_001114403;ensg_id=ENSG00000168255,ENSG00000228049;gsymbol=POLR2J3,POLR2J2;-:200:-	2.09868	1.54684	4.543e-14	7.64924e-13	10	20	28	23	27	32	164.913	303.435	326.15	911.975	902.045	1034.59
chr6:30709110:30709310:chr6:30708456-30709481;refseq_id=NM_005803;ensg_id=ENSG00000137312;gsymbol=FLOT1;-:200:-	2.09865	0.916796	3.20189e-08	2.10058e-07	7	14	16	23	16	13	115.439	212.404	186.372	911.975	534.545	420.304
chr14:105934474:105934674:chr14:105933044-105935835;refseq_id=NM_004689,NM_001203258;ensg_id=ENSG00000182979;gsymbol=MTA1;+:200:+	2.09432	1.28201	1.358e-12	1.92599e-11	13	14	21	18	23	27	214.387	212.404	244.613	713.719	768.408	872.939
chr3:38555040:38555240:chr3:38548345-38567796;refseq_id=NA;ensg_id=ENSG00000157036;gsymbol=EXOG;+:200:+	2.09336	-0.523734	0.00135065	0.00359822	4	3	4	6	2	8	65.9652	45.5152	46.5929	237.906	66.8181	258.649
chr7:111422980:111423180:chr7:111418332-111424008;refseq_id=NM_014705;ensg_id=ENSG00000128512;gsymbol=DOCK4;-:200:-	2.09306	-0.181237	0.000367709	0.00113432	5	6	4	3	7	12	82.4565	91.0305	46.5929	118.953	233.863	387.973
chr10:28822963:28823162:chr10:28822927-28824686;refseq_id=NM_016628,NM_100486;ensg_id=ENSG00000095787;gsymbol=WAC;+:199:+	2.0903	0.0637508	1.1184e-05	4.60564e-05	2	6	11	7	7	13	32.9826	91.0305	128.13	277.557	233.863	420.304
chr1:150240391:150240591:chr1:150239756-150241609;refseq_id=NM_001077628,NM_016022,NM_001243772,NM_001243771,NR_045033;ensg_id=ENSG00000117362;gsymbol=APH1A;-:200:-	2.08676	-0.281586	0.000238982	0.000771331	1	6	7	8	8	4	16.4913	91.0305	81.5376	317.209	267.272	129.324
chr17:39845829:39846029:chr17:39845127-39846441;refseq_id=NA;ensg_id=NA;gsymbol=NA;+:200:+	2.08585	-0.0668716	0.000261559	0.000833964	5	4	8	9	3	12	82.4565	60.687	93.1858	356.86	100.227	387.973
chr17:27237851:27238051:chr17:27237244-27238255;refseq_id=NM_001033561,NM_020889;ensg_id=ENSG00000109118;gsymbol=PHF12;-:200:-	2.07895	-0.338644	0.00605272	0.0136196	5	6	2	7	1	11	82.4565	91.0305	23.2964	277.557	33.4091	355.642
chr10:101996726:101996926:chr10:101995424-101997988;refseq_id=NM_018294;ensg_id=ENSG00000095485;gsymbol=CWF19L1;-:200:-	2.07879	0.0685593	3.37848e-06	1.52949e-05	5	5	9	10	8	9	82.4565	75.8587	104.834	396.511	267.272	290.98
chr18:33713000:33713200:chr18:33709837-33716340;refseq_id=NM_018255,NR_040110,NM_001242877,NM_001242878,NM_001242879;ensg_id=ENSG00000134759;gsymbol=ELP2;+:200:+	2.07827	0.0741714	1.83505e-05	7.2848e-05	8	5	6	11	8	8	131.93	75.8587	69.8893	436.162	267.272	258.649
chr11:66391484:66391684:chr11:66384053-66397397;refseq_id=NA;ensg_id=NA;gsymbol=NA;+:200:+	2.07674	-0.251643	0.0109527	0.0225929	3	3	9	10	0	10	49.4739	45.5152	104.834	396.511	0	323.311
chr9:34647288:34647488:chr9:34647086-34647958;refseq_id=NM_000155,NM_001258332;ensg_id=ENSG00000213930,ENSG00000258728;gsymbol=GALT;+:200:+	2.07499	-0.0688525	3.64834e-05	0.000138402	5	3	9	8	5	11	82.4565	45.5152	104.834	317.209	167.045	355.642
chr11:32608391:32608591:chr11:32605378-32611187;refseq_id=NM_006360;ensg_id=ENSG00000149100;gsymbol=EIF3M;+:200:+	2.0746	-0.277099	8.23261e-05	0.000293727	6	3	5	7	8	5	98.9479	45.5152	58.2411	277.557	267.272	161.655
chr6:127603231:127603431:chr6:127601376-127607322;refseq_id=NM_001242851,NM_001242849,NM_001242850,NM_001242844,NM_001242852,NM_030963,NM_001242845,NM_001242846;ensg_id=ENSG00000118518,ENSG00000260527;gsymbol=RNF146,RP11-73O6.4;+:200:+	2.07311	0.724308	2.35737e-08	1.60189e-07	11	11	10	11	20	14	181.404	166.889	116.482	436.162	668.181	452.635
chr19:10290658:10290858:chr19:10287968-10290910;refseq_id=NM_001130823,NM_001379;ensg_id=ENSG00000130816;gsymbol=DNMT1;-:200:-	2.07223	0.243646	3.32329e-06	1.51051e-05	9	4	9	11	8	12	148.422	60.687	104.834	436.162	267.272	387.973
chr1:153914832:153915031:chr1:153914345-153915101;refseq_id=NM_014856;ensg_id=ENSG00000198837;gsymbol=DENND4B;-:199:-	2.07214	-0.28109	0.000159864	0.000536228	3	5	6	3	8	9	49.4739	75.8587	69.8893	118.953	267.272	290.98
chr17:7481282:7481482:chr17:7481145-7482324;refseq_id=NA;ensg_id=ENSG00000264772;gsymbol=RP11-186B7.4;+:200:+	2.07181	2.68284	2.68368e-20	7.77359e-19	42	46	35	49	57	67	692.635	697.9	407.688	1942.9	1904.32	2166.18
chr12:56361440:56361640:chr12:56360556-56361953;refseq_id=NM_001798,NM_052827;ensg_id=ENSG00000123374;gsymbol=CDK2;+:200:+	2.07057	-0.0674152	0.000122681	0.000419659	6	3	8	7	5	12	98.9479	45.5152	93.1858	277.557	167.045	387.973
chr17:47014653:47014853:chr17:47014382-47018424;refseq_id=NM_007241;ensg_id=ENSG00000159210;gsymbol=SNF8;-:200:-	2.06882	-0.645626	0.0165739	0.0318972	4	1	5	6	0	8	65.9652	15.1717	58.2411	237.906	0	258.649
chr14:50579437:50579637:chr14:50575350-50581122;refseq_id=NA;ensg_id=ENSG00000100483;gsymbol=METTL21D;-:200:-	2.06501	0.392322	2.87273e-07	1.56105e-06	6	6	13	9	12	14	98.9479	91.0305	151.427	356.86	400.909	452.635
chr2:113305522:113305722:chr2:113304998-113306976;refseq_id=NM_019014,NM_001137604;ensg_id=ENSG00000125630;gsymbol=POLR1B;+:200:+	2.06363	-0.273175	0.00161613	0.00421995	6	5	3	8	2	10	98.9479	75.8587	34.9447	317.209	66.8181	323.311
chr11:75112483:75112683:chr11:75111738-75115251;refseq_id=NM_001276726,NM_001005,NM_001276724,NM_020929;ensg_id=ENSG00000149273;gsymbol=RPS3;+:200:+	2.06331	-0.155658	0.000476793	0.00142113	4	4	8	12	7	3	65.9652	60.687	93.1858	475.813	233.863	96.9932
chr14:103986929:103987129:chr14:103986459-103987771;refseq_id=NM_001823;ensg_id=ENSG00000166165;gsymbol=CKB;-:200:-	2.06173	0.429723	3.43724e-07	1.84724e-06	3	7	16	12	14	10	49.4739	106.202	186.372	475.813	467.727	323.311
chr10:120920593:120920793:chr10:120920427-120921926;refseq_id=NM_213649;ensg_id=ENSG00000183605;gsymbol=SFXN4;-:200:-	2.06142	0.969093	2.2452e-10	2.2052e-09	10	8	21	17	18	19	164.913	121.374	244.613	674.068	601.363	614.29
chr11:47515995:47516195:chr11:47510389-47521156;refseq_id=NM_001025596;ensg_id=ENSG00000149187;gsymbol=CELF1;-:200:-	2.06008	0.541961	1.07279e-07	6.33296e-07	10	9	9	12	14	13	164.913	136.546	104.834	475.813	467.727	420.304
chrX:153197568:153197768:chrX:153196216-153197884;refseq_id=NM_003491,NM_000718,NM_001256119;ensg_id=ENSG00000102030,ENSG00000089820;gsymbol=NAA10,ARHGAP4;-:200:-	2.05875	-0.0207518	9.63661e-05	0.000338867	2	4	12	4	12	9	32.9826	60.687	139.779	158.604	400.909	290.98
chr17:29496708:29496908:chr17:29490204-29508507;refseq_id=NM_000267,NM_001042492,NM_001128147;ensg_id=ENSG00000196712;gsymbol=NF1;+:200:+	2.05855	1.09354	7.79148e-08	4.6886e-07	14	15	13	12	16	31	230.878	227.576	151.427	475.813	534.545	1002.26
chr19:49605170:49605370:chr19:49604647-49607992;refseq_id=NM_003089;ensg_id=ENSG00000104852;gsymbol=SNRNP70;+:200:+	2.05851	0.867552	3.53542e-09	2.76523e-08	9	13	14	11	18	21	148.422	197.233	163.075	436.162	601.363	678.952
chr2:61764722:61764922:chr2:61760907-61765761;refseq_id=NA;ensg_id=ENSG00000082898;gsymbol=XPO1;-:200:-	2.04936	1.81038	2.11958e-16	4.82982e-15	16	22	33	28	32	37	263.861	333.778	384.391	1110.23	1069.09	1196.25
chr3:58117453:58117653:chr3:58116468-58118658;refseq_id=NM_001164317,NM_001457,NM_001164318,NM_001164319;ensg_id=ENSG00000136068;gsymbol=FLNB;+:200:+	2.04897	-0.217432	4.18097e-05	0.000157559	3	5	7	7	7	7	49.4739	75.8587	81.5376	277.557	233.863	226.317
chr15:63356062:63356262:chr15:63354775-63358292;refseq_id=NM_001018005,NM_000366,NM_001018006,NM_001018008,NM_001018004,NM_001018007,NM_001018020;ensg_id=ENSG00000140416;gsymbol=TPM1;+:200:+	2.0444	-0.0135186	6.45775e-05	0.000235818	4	6	8	5	7	13	65.9652	91.0305	93.1858	198.255	233.863	420.304
chr12:44164640:44164840:chr12:44161906-44165168;refseq_id=NM_001114182,NM_016123,NM_001145256,NM_001145257,NM_001145258;ensg_id=ENSG00000198001;gsymbol=IRAK4;+:200:+	2.04414	-0.0129071	1.56531e-05	6.27962e-05	5	5	8	6	8	11	82.4565	75.8587	93.1858	237.906	267.272	355.642
chr2:210881996:210882196:chr2:210881231-210886291;refseq_id=NM_001278283,NM_001265598,NM_199229,NM_006916,NM_001278285,NM_001278286,NM_001270938,NM_001278282;ensg_id=ENSG00000197713;gsymbol=RPE;+:200:+	2.04173	0.21264	2.60714e-05	0.000100351	5	5	12	9	6	15	82.4565	75.8587	139.779	356.86	200.454	484.966
chr15:63353711:63353911:chr15:63353397-63354476;refseq_id=NM_000366,NM_001018005,NM_001018006,NM_001018008,NM_001018004,NM_001018007,NM_001018020;ensg_id=ENSG00000140416;gsymbol=TPM1;+:200:+	2.04089	1.28005	1.7113e-10	1.73567e-09	8	12	30	21	19	27	131.93	182.061	349.447	832.672	634.772	872.939
chr16:68324098:68324298:chr16:68321649-68325235;refseq_id=NM_003983,NM_001076785;ensg_id=ENSG00000103064;gsymbol=SLC7A6;+:200:+	2.03781	0.475895	8.81325e-06	3.70114e-05	7	8	12	8	9	20	115.439	121.374	139.779	317.209	300.682	646.621
chr5:134182152:134182352:chr5:134181658-134195425;refseq_id=NA;ensg_id=NA;gsymbol=NA;+:200:+	2.02991	0.475202	1.35741e-06	6.59036e-06	9	6	12	6	15	16	148.422	91.0305	139.779	237.906	501.136	517.297
chr12:48359671:48359871:chr12:48359065-48360515;refseq_id=NM_001143841,NM_024056,NM_001143842,NM_001143843;ensg_id=ENSG00000134291;gsymbol=TMEM106C;+:200:+	2.02726	1.55684	6.14244e-14	1.01424e-12	12	24	24	23	29	29	197.896	364.122	279.557	911.975	968.863	937.601
chrX:23801826:23801916:chrX:23801775-23803546;refseq_id=NM_002970,NR_027783;ensg_id=ENSG00000130066;gsymbol=SAT1;+:90:+	2.02701	0.612074	9.80656e-07	4.922e-06	7	12	11	8	13	20	115.439	182.061	128.13	317.209	434.318	646.621
chr11:8602507:8602707:chr11:8496228-8615503;refseq_id=NM_030906;ensg_id=ENSG00000130413;gsymbol=STK33;-:200:-	2.02577	-0.161109	4.2891e-05	0.000160924	2	4	10	7	8	7	32.9826	60.687	116.482	277.557	267.272	226.317
chr17:2579598:2579798:chr17:2577354-2583614;refseq_id=NM_000430;ensg_id=ENSG00000007168;gsymbol=PAFAH1B1;+:200:+	2.02576	1.02115	8.85596e-08	5.2919e-07	11	15	15	24	12	19	181.404	227.576	174.723	951.626	400.909	614.29
chr3:50004430:50004630:chr3:50000009-50009581;refseq_id=NM_001167582,NM_005777;ensg_id=ENSG00000004534;gsymbol=RBM6;+:200:+	2.02246	0.650752	2.44188e-08	1.65602e-07	10	10	11	13	16	13	164.913	151.717	128.13	515.464	534.545	420.304
chr17:38287589:38287789:chr17:38285498-38288351;refseq_id=NA;ensg_id=ENSG00000188895;gsymbol=MSL1;+:200:+	2.01561	2.2806	2.23321e-20	6.63748e-19	28	25	46	37	53	42	461.757	379.294	535.818	1467.09	1770.68	1357.9
chr12:49231440:49231640:chr12:49230677-49231863;refseq_id=NM_004818;ensg_id=ENSG00000174243;gsymbol=DDX23;-:200:-	2.01473	0.410053	9.65353e-07	4.85947e-06	6	6	14	8	11	16	98.9479	91.0305	163.075	317.209	367.5	517.297
chr19:10675710:10675910:chr19:10673405-10676702;refseq_id=NM_023008;ensg_id=ENSG00000129347;gsymbol=KRI1;-:200:-	2.01439	1.01354	2.83998e-10	2.73438e-09	13	9	19	17	22	16	214.387	136.546	221.316	674.068	734.999	517.297
chr12:51451614:51451814:chr12:51450133-51454207;refseq_id=NA;ensg_id=ENSG00000050426;gsymbol=LETMD1;+:200:+	2.00872	0.265876	2.01662e-06	9.48118e-06	7	8	8	12	9	10	115.439	121.374	93.1858	475.813	300.682	323.311
chr17:38191225:38191369:chr17:38189598-38191602;refseq_id=NM_001267797,NM_014815,NR_052017,NM_001079518;ensg_id=ENSG00000008838;gsymbol=MED24;-:144:-	2.00698	-0.375006	0.00581996	0.0131478	8	2	3	7	2	9	131.93	30.3435	34.9447	277.557	66.8181	290.98
chr1:200797500:200797700:chr1:200784689-200801469;refseq_id=NM_203459;ensg_id=ENSG00000118200;gsymbol=CAMSAP2;+:200:+	2.00451	-0.313936	0.000376798	0.00115818	4	4	6	7	9	3	65.9652	60.687	69.8893	277.557	300.682	96.9932
chr12:133446420:133446620:chr12:133438053-133447369;refseq_id=NM_018223,NM_001161344,NM_001161345,NM_001161346,NM_001161347;ensg_id=ENSG00000072609;gsymbol=CHFR;-:200:-	2.00004	-0.311212	0.000523481	0.00155048	7	2	5	6	5	8	115.439	30.3435	58.2411	237.906	167.045	258.649
chr1:225705008:225705208:chr1:225702298-225707267;refseq_id=NM_001008493,NM_018212;ensg_id=ENSG00000154380;gsymbol=ENAH;-:200:-	1.99785	0.993499	1.90132e-09	1.55844e-08	8	11	22	17	15	22	131.93	166.889	256.261	674.068	501.136	711.284
chr1:224378593:224378793:chr1:224377279-224381142;refseq_id=NM_003676;ensg_id=ENSG00000143753;gsymbol=DEGS1;+:200:+	1.99573	-0.310817	0.00128548	0.00345967	8	1	5	7	8	4	131.93	15.1717	58.2411	277.557	267.272	129.324
chr20:57244146:57244346:chr20:57243043-57245659;refseq_id=NM_003763,NR_037943,NM_001134773,NR_037941,NM_001204868,NM_001001433,NR_037942,NM_001134772;ensg_id=ENSG00000124222,ENSG00000270044,ENSG00000254995;gsymbol=STX16,STX16-NPEPL1;+:200:+	1.98803	-0.286703	0.00650308	0.0145088	1	5	9	9	1	9	16.4913	75.8587	104.834	356.86	33.4091	290.98
chr2:55495875:55496075:chr2:55494705-55496384;refseq_id=NM_002453;ensg_id=ENSG00000085760;gsymbol=MTIF2;-:200:-	1.97945	-0.251159	0.000209415	0.000686929	3	5	7	6	9	5	49.4739	75.8587	81.5376	237.906	300.682	161.655
chr2:172188377:172188577:chr2:172187069-172196064;refseq_id=NM_024770;ensg_id=ENSG00000123600;gsymbol=METTL8;-:200:-	1.97915	-0.250225	0.000193243	0.000638093	2	7	6	5	7	8	32.9826	106.202	69.8893	198.255	233.863	258.649
chr1:55619590:55619790:chr1:55614136-55619953;refseq_id=NM_015306;ensg_id=ENSG00000162402;gsymbol=USP24;-:200:-	1.96795	1.26834	1.75858e-10	1.77835e-09	12	22	16	21	24	20	197.896	333.778	186.372	832.672	801.817	646.621
chr14:103852177:103852377:chr14:103851748-103871604;refseq_id=NA;ensg_id=ENSG00000075413;gsymbol=MARK3;+:200:+	1.95912	-0.187881	0.000117602	0.000404392	4	5	7	7	7	7	65.9652	75.8587	81.5376	277.557	233.863	226.317
chr19:39948733:39948933:chr19:39948315-39949527;refseq_id=NM_001111020,NM_001130824,NM_001130825,NM_003169;ensg_id=ENSG00000196235;gsymbol=SUPT5H;+:200:+	1.95084	1.17431	2.11524e-09	1.71324e-08	8	12	28	14	22	25	131.93	182.061	326.15	555.115	734.999	808.277
chrX:53571723:53571923:chrX:53570802-53572122;refseq_id=NM_031407;ensg_id=ENSG00000086758;gsymbol=HUWE1;-:200:-	1.94996	1.5745	4.25466e-11	4.72157e-10	17	20	26	31	21	28	280.352	303.435	302.854	1229.18	701.59	905.27
chr3:48732257:48732457:chr3:48730884-48732854;refseq_id=NM_016291,NM_001005909;ensg_id=ENSG00000068745;gsymbol=IP6K2;-:200:-	1.94727	0.906973	1.44572e-09	1.21114e-08	10	12	17	14	17	19	164.913	182.061	198.02	555.115	567.954	614.29
chr15:85178882:85179082:chr15:85177055-85180651;refseq_id=NR_004859,NR_003654;ensg_id=ENSG00000176700;gsymbol=SCAND2;+:200:+	1.94565	0.287356	5.03833e-06	2.19656e-05	10	7	7	7	11	13	164.913	106.202	81.5376	277.557	367.5	420.304
chr8:144672251:144672451:chr8:144668899-144675063;refseq_id=NM_001130055,NM_001960,NM_001195203,NM_001130056,NM_001130057,NM_001130053,NM_032378;ensg_id=ENSG00000104529;gsymbol=EEF1D;-:200:-	1.9436	-0.414858	0.00128853	0.00346514	5	4	4	6	3	8	82.4565	60.687	46.5929	237.906	100.227	258.649
chr3:23929528:23929728:chr3:23929058-23930750;refseq_id=NM_003341,NM_182666,NM_001202476;ensg_id=ENSG00000170142;gsymbol=UBE2E1;+:200:+	1.94111	-0.129402	4.2891e-05	0.000160924	4	5	8	7	7	8	65.9652	75.8587	93.1858	277.557	233.863	258.649
chr1:1424871:1425071:chr1:1424584-1425804;refseq_id=NM_031921;ensg_id=ENSG00000160072;gsymbol=ATAD3B;+:200:+	1.94101	-0.128411	0.000184423	0.000611404	5	5	7	5	8	9	82.4565	75.8587	81.5376	198.255	267.272	290.98
chr19:46283639:46283839:chr19:46283036-46285815;refseq_id=NA;ensg_id=ENSG00000268434;gsymbol=AC011530.4;-:200:-	1.93099	0.647146	9.12252e-07	4.61254e-06	14	7	11	9	19	13	230.878	106.202	128.13	356.86	634.772	420.304
chr10:22027157:22027357:chr10:22024068-22029165;refseq_id=NM_004641,NM_001195626;ensg_id=ENSG00000078403;gsymbol=MLLT10;+:200:+	1.92699	0.1676	0.000412627	0.00125365	3	12	7	9	5	14	49.4739	182.061	81.5376	356.86	167.045	452.635
chr3:140685641:140685841:chr3:140681969-140689835;refseq_id=NM_018155,NM_001104647;ensg_id=ENSG00000114120;gsymbol=SLC25A36;+:200:+	1.92607	1.64282	5.94031e-13	8.94449e-12	19	15	33	23	28	33	313.335	227.576	384.391	911.975	935.454	1066.93
chr4:77068793:77068993:chr4:77065543-77069655;refseq_id=NM_017426;ensg_id=ENSG00000138750;gsymbol=NUP54;-:200:-	1.92163	1.02326	2.9652e-09	2.35152e-08	10	14	19	19	18	17	164.913	212.404	221.316	753.37	601.363	549.628
chr14:73783130:73783330:chr14:73763919-73789912;refseq_id=NM_001005745,NM_001005744,NM_001005743,NM_003744;ensg_id=ENSG00000133961;gsymbol=NUMB;-:200:-	1.91197	0.785278	3.62689e-07	1.94002e-06	9	15	12	18	12	15	148.422	227.576	139.779	713.719	400.909	484.966
chr17:26909837:26910037:chr17:26907027-26910667;refseq_id=NM_006461;ensg_id=ENSG00000076382,ENSG00000258472;gsymbol=SPAG5,RP11-192H23.4;-:200:-	1.90862	0.621399	8.26144e-08	4.95396e-07	7	9	16	14	13	13	115.439	136.546	186.372	555.115	434.318	420.304
chr17:52980873:52981073:chr17:52978052-52990176;refseq_id=NM_005486;ensg_id=ENSG00000141198;gsymbol=TOM1L1;+:200:+	1.90594	-0.286194	0.00051306	0.00152094	3	4	8	6	7	6	49.4739	60.687	93.1858	237.906	233.863	193.986
chr20:62579828:62580028:chr20:62577806-62587800;refseq_id=NA;ensg_id=NA;gsymbol=NA;-:200:-	1.90448	0.725392	2.18374e-05	8.53473e-05	11	6	18	12	8	23	181.404	91.0305	209.668	475.813	267.272	743.615
chr15:78838716:78838916:chr15:78837976-78841563;refseq_id=NM_002789,NM_001102667,NM_001102668;ensg_id=ENSG00000041357;gsymbol=PSMA4;+:200:+	1.9019	0.119065	0.00058843	0.00170735	6	10	5	3	13	11	98.9479	151.717	58.2411	118.953	434.318	355.642
chr12:51447360:51447560:chr12:51442817-51449804;refseq_id=NM_015416,NR_045018,NR_045019,NR_045020,NM_001243689;ensg_id=ENSG00000050426;gsymbol=LETMD1;+:200:+	1.89988	0.87803	4.52237e-07	2.40396e-06	12	11	16	21	13	14	197.896	166.889	186.372	832.672	434.318	452.635
chr15:89455407:89455607:chr15:89453023-89456663;refseq_id=NA;ensg_id=NA;gsymbol=NA;-:200:-	1.89664	0.0311888	4.12475e-05	0.000155956	4	4	12	6	11	8	65.9652	60.687	139.779	237.906	367.5	258.649
chr10:102249155:102249355:chr10:102248615-102249518;refseq_id=NM_015490;ensg_id=ENSG00000075826;gsymbol=SEC31B;-:200:-	1.89635	1.2443	5.35747e-10	4.8444e-09	16	13	22	15	24	24	263.861	197.233	256.261	594.766	801.817	775.946
chr12:57039137:57039337:chr12:57038565-57039852;refseq_id=NA;ensg_id=NA;gsymbol=NA;-:200:-	1.88259	0.907186	2.57545e-08	1.7397e-07	13	11	16	17	16	16	214.387	166.889	186.372	674.068	534.545	517.297
chrX:135958814:135959014:chrX:135957630-135961282;refseq_id=NM_001164803,NR_028477,NM_002139;ensg_id=ENSG00000147274;gsymbol=RBMX;-:200:-	1.87726	0.759126	3.83494e-08	2.45006e-07	11	8	17	12	17	15	181.404	121.374	198.02	475.813	567.954	484.966
chr20:18286762:18286962:chr20:18269121-18297640;refseq_id=NM_003434,NM_001083330;ensg_id=ENSG00000125846;gsymbol=ZNF133;+:200:+	1.86425	0.825719	2.30063e-08	1.56644e-07	11	11	16	13	17	16	181.404	166.889	186.372	515.464	567.954	517.297
chr20:25666298:25666498:chr20:25654851-25666758;refseq_id=NM_015655;ensg_id=ENSG00000130684;gsymbol=ZNF337;-:200:-	1.86373	0.181716	1.30003e-05	5.2962e-05	7	3	13	6	11	11	115.439	45.5152	151.427	237.906	367.5	355.642
chr3:119154782:119154982:chr3:119153609-119155825;refseq_id=NM_018266,NR_073506;ensg_id=ENSG00000176142;gsymbol=TMEM39A;-:200:-	1.86267	0.639783	5.12949e-06	2.23061e-05	10	9	14	9	11	20	164.913	136.546	163.075	356.86	367.5	646.621
chr22:29678178:29678378:chr22:29674019-29683123;refseq_id=NM_001163287,NM_013986,NM_005243,NM_001163285,NM_001163286;ensg_id=ENSG00000182944;gsymbol=EWSR1;+:200:+	1.86248	2.21584	5.16858e-14	8.6599e-13	31	40	29	40	38	43	511.231	606.87	337.798	1586.04	1269.54	1390.24
chr13:31728892:31729092:chr13:31726989-31729791;refseq_id=NM_006644;ensg_id=ENSG00000120694;gsymbol=HSPH1;-:200:-	1.85641	0.797009	3.59297e-06	1.61165e-05	10	15	12	9	13	23	164.913	227.576	139.779	356.86	434.318	743.615
chr19:36235639:36235839:chr19:36235224-36236113;refseq_id=NM_024660,NM_144987,NM_001040425;ensg_id=ENSG00000267120,ENSG00000161265;gsymbol=AD000671.6,U2AF1L4;-:200:-	1.85455	0.230904	2.09394e-05	8.23367e-05	6	6	12	8	8	13	98.9479	91.0305	139.779	317.209	267.272	420.304
chr10:5755897:5756097:chr10:5754786-5759713;refseq_id=NM_017782;ensg_id=ENSG00000108021;gsymbol=FAM208B;+:200:+	1.85449	0.713348	1.29161e-06	6.33388e-06	9	13	13	16	10	16	148.422	197.233	151.427	634.417	334.091	517.297
chr17:45659907:45660107:chr17:45656756-45663066;refseq_id=NM_006310;ensg_id=ENSG00000141279;gsymbol=NPEPPS;+:200:+	1.85122	0.706806	1.26649e-07	7.39978e-07	5	14	16	13	14	15	82.4565	212.404	186.372	515.464	467.727	484.966
chr19:805291:805491:chr19:805013-806556;refseq_id=NM_002819,NM_031990,NM_031991;ensg_id=ENSG00000011304;gsymbol=PTBP1;+:200:+	1.85064	-0.103544	0.00171746	0.00445732	5	5	8	2	9	11	82.4565	75.8587	93.1858	79.3021	300.682	355.642
chr19:805312:805512:chr19:805013-806556;refseq_id=NM_002819,NM_031990,NM_031991;ensg_id=ENSG00000011304;gsymbol=PTBP1;+:200:+	1.84947	0.271474	0.000416307	0.00126136	5	6	14	3	12	15	82.4565	91.0305	163.075	118.953	400.909	484.966
chr10:103565900:103566100:chr10:103563492-103567658;refseq_id=NM_012215,NM_001142434;ensg_id=ENSG00000198408;gsymbol=MGEA5;-:200:-	1.8492	-0.0498831	6.97723e-05	0.000253165	4	4	11	7	10	6	65.9652	60.687	128.13	277.557	334.091	193.986
chr6:126329618:126329802:chr6:126329538-126332563;refseq_id=NM_001031712;ensg_id=ENSG00000066651,ENSG00000260527;gsymbol=TRMT11,RP11-73O6.4;+:184:+	1.8461	0.914709	6.10875e-06	2.633e-05	13	9	19	9	13	27	214.387	136.546	221.316	356.86	434.318	872.939
chr11:3383119:3383319:chr11:3379157-3392300;refseq_id=NM_001130520,NR_073030,NM_001242843,NM_001270782,NM_001130519,NM_001242842,NM_001256825,NM_001786,NM_001242841,NM_007152;ensg_id=ENSG00000005801;gsymbol=ZNF195;-:200:-	1.84377	-0.042926	0.00027196	0.000863099	7	6	6	4	11	8	115.439	91.0305	69.8893	158.604	367.5	258.649
chr5:154247051:154247251:chr5:154244752-154250382;refseq_id=NM_004779;ensg_id=ENSG00000155508;gsymbol=CNOT8;+:200:+	1.84346	0.71403	8.77922e-07	4.45213e-06	10	15	10	9	17	16	164.913	227.576	116.482	356.86	567.954	517.297
chr1:33122827:33123027:chr1:33117515-33133999;refseq_id=NM_005610,NM_001135255,NM_001135256;ensg_id=ENSG00000162521;gsymbol=RBBP4;+:200:+	1.84009	0.280064	0.000147297	0.000497492	5	11	9	7	7	16	82.4565	166.889	104.834	277.557	233.863	517.297
chr6:37342195:37342395:chr6:37339288-37344809;refseq_id=NM_003958,NR_046399,NM_183078;ensg_id=ENSG00000112130;gsymbol=RNF8;+:200:+	1.83292	-0.380975	0.0030912	0.00750406	4	7	3	6	8	3	65.9652	106.202	34.9447	237.906	267.272	96.9932
chr1:155650247:155650447:chr1:155649200-155657992;refseq_id=NM_001198901,NM_139118,NM_001198906,NM_139121,NM_018253,NM_001198905,NM_001198900,NM_001198902,NM_139119,NM_001198899,NM_001198904,NM_001198903;ensg_id=ENSG00000163374;gsymbol=YY1AP1;-:200:-	1.82996	1.05718	1.60546e-05	6.43313e-05	19	13	13	15	10	29	313.335	197.233	151.427	594.766	334.091	937.601
chr11:62651260:62651460:chr11:62650380-62651997;refseq_id=NM_002394,NM_001012662,NM_001012664,NM_001013251;ensg_id=ENSG00000168003;gsymbol=SLC3A2;+:200:+	1.82613	0.0625074	0.000209996	0.000688175	6	7	8	6	6	13	98.9479	106.202	93.1858	237.906	200.454	420.304
chr17:73204421:73204621:chr17:73201815-73206080;refseq_id=NM_024844;ensg_id=ENSG00000125450;gsymbol=NUP85;+:200:+	1.82293	1.5403	2.90068e-11	3.31589e-10	13	25	27	24	27	25	214.387	379.294	314.502	951.626	902.045	808.277
chr7:150817406:150817606:chr7:150817074-150820725;refseq_id=NM_031946;ensg_id=ENSG00000133612;gsymbol=AGAP3;+:200:+	1.82292	0.00950728	0.00081982	0.00230819	5	8	7	3	8	13	82.4565	121.374	81.5376	118.953	267.272	420.304
chr12:50136020:50136220:chr12:50135740-50146332;refseq_id=NM_003217,NM_001098576;ensg_id=ENSG00000139644;gsymbol=TMBIM6;+:200:+	1.82093	-0.253607	0.000579611	0.00168605	3	6	7	7	4	8	49.4739	91.0305	81.5376	277.557	133.636	258.649
chr4:54880286:54880486:chr4:54880004-54915277;refseq_id=NM_012110;ensg_id=ENSG00000109220;gsymbol=CHIC2;-:200:-	1.81809	0.663736	2.29335e-06	1.06939e-05	13	11	10	14	11	15	214.387	166.889	116.482	555.115	367.5	484.966
chr5:178046897:178047097:chr5:178045557-178050417;refseq_id=NM_020666;ensg_id=ENSG00000113240;gsymbol=CLK4;-:200:-	1.8169	0.112821	5.83518e-05	0.000214921	6	8	8	5	9	12	98.9479	121.374	93.1858	198.255	300.682	387.973
chr4:48833158:48833243:chr4:48833080-48834699;refseq_id=NA;ensg_id=ENSG00000109180;gsymbol=OCIAD1;+:85:+	1.81596	-0.251142	0.0012035	0.00326214	4	7	5	6	8	5	65.9652	106.202	58.2411	237.906	267.272	161.655
chr20:34062418:34062618:chr20:34061695-34063471;refseq_id=NM_007186;ensg_id=ENSG00000126001;gsymbol=CEP250;+:200:+	1.81437	-0.194229	0.000996054	0.00275892	3	5	9	8	8	4	49.4739	75.8587	104.834	317.209	267.272	129.324
chr6:131193678:131193878:chr6:131191468-131199390;refseq_id=NM_001431,NM_001135554,NM_001199389,NM_001252660,NM_001199388,NM_001135555;ensg_id=ENSG00000079819;gsymbol=EPB41L2;-:200:-	1.81318	1.46189	8.79304e-11	9.27611e-10	16	16	30	19	30	23	263.861	242.748	349.447	753.37	1002.27	743.615
chr19:53120094:53120294:chr19:53115618-53122315;refseq_id=NA;ensg_id=ENSG00000167766;gsymbol=ZNF83;-:200:-	1.80989	0.158902	7.42991e-05	0.00026732	5	8	10	5	11	11	82.4565	121.374	116.482	198.255	367.5	355.642
chr10:97445393:97445593:chr10:97444256-97446287;refseq_id=NM_001143973,NM_015631;ensg_id=ENSG00000119977;gsymbol=TCTN3;-:200:-	1.8077	0.488366	3.83673e-06	1.712e-05	10	7	13	11	10	14	164.913	106.202	151.427	436.162	334.091	452.635
chr17:52980868:52981068:chr17:52978052-52990176;refseq_id=NM_005486;ensg_id=ENSG00000141198;gsymbol=TOM1L1;+:200:+	1.80484	-0.194805	0.000476897	0.00142113	3	5	9	6	7	7	49.4739	75.8587	104.834	237.906	233.863	226.317
chr11:134053048:134053248:chr11:134050972-134054647;refseq_id=NM_015261;ensg_id=ENSG00000151503;gsymbol=NCAPD3;-:200:-	1.80478	-0.19123	0.000476897	0.00142113	4	6	7	7	7	6	65.9652	91.0305	81.5376	277.557	233.863	193.986
chr10:43021108:43021308:chr10:43019060-43046063;refseq_id=NR_026777;ensg_id=ENSG00000234420;gsymbol=ZNF37BP;-:200:-	1.80253	-0.245995	0.00175907	0.00454461	9	4	3	6	5	8	148.422	60.687	34.9447	237.906	167.045	258.649
chr16:53337431:53337631:chr16:53330868-53340309;refseq_id=NM_025134;ensg_id=ENSG00000177200;gsymbol=CHD9;+:200:+	1.79966	0.636125	5.29767e-06	2.2979e-05	5	14	15	16	11	12	82.4565	212.404	174.723	634.417	367.5	387.973
chr12:50538844:50539044:chr12:50537735-50561097;refseq_id=NA;ensg_id=ENSG00000139624;gsymbol=CERS5;-:200:-	1.79819	-0.186838	0.000715339	0.00203414	7	6	4	4	7	9	115.439	91.0305	46.5929	158.604	233.863	290.98
chr2:219611525:219611725:chr2:219610878-219612095;refseq_id=NM_014640;ensg_id=ENSG00000135912;gsymbol=TTLL4;+:200:+	1.79517	0.254531	3.3745e-05	0.000128156	6	9	10	8	12	9	98.9479	136.546	116.482	317.209	400.909	290.98
chr7:45765835:45766035:chr7:45763952-45767912;refseq_id=NR_024271;ensg_id=ENSG00000214765;gsymbol=SEPT7P2;-:200:-	1.79422	0.303047	0.000111473	0.000387062	9	7	10	13	7	10	148.422	106.202	116.482	515.464	233.863	323.311
chr7:102184149:102184349:chr7:102181948-102185223;refseq_id=NM_001097615,NM_001114403;ensg_id=ENSG00000168255,ENSG00000228049;gsymbol=POLR2J3,POLR2J2;-:200:-	1.7911	1.74417	4.74201e-11	5.21164e-10	12	24	41	25	28	34	197.896	364.122	477.577	991.277	935.454	1099.26
chr2:210882676:210882876:chr2:210882197-210886291;refseq_id=NM_001278283,NM_001265598,NM_199229,NM_006916,NM_001278285,NM_001278286,NM_001270938,NM_001278282;ensg_id=ENSG00000197713;gsymbol=RPE;+:200:+	1.78672	0.820429	3.95644e-06	1.76312e-05	11	12	16	7	17	21	181.404	182.061	186.372	277.557	567.954	678.952
chr4:48833069:48833243:chr4:48833026-48834699;refseq_id=NA;ensg_id=ENSG00000109180;gsymbol=OCIAD1;+:174:+	1.78547	-0.0730543	0.000274913	0.000870855	5	7	7	8	8	6	82.4565	106.202	81.5376	317.209	267.272	193.986
chr12:57932307:57932507:chr12:57929532-57939879;refseq_id=NM_006400;ensg_id=ENSG00000175203;gsymbol=DCTN2;-:200:-	1.78479	0.639527	1.08973e-06	5.42168e-06	11	11	12	10	13	16	181.404	166.889	139.779	396.511	434.318	517.297
chr21:40720377:40720470:chr21:40720218-40720503;refseq_id=NM_004965;ensg_id=ENSG00000205581;gsymbol=HMGN1;-:93:-	1.78071	0.083736	0.000366403	0.00113131	6	5	11	9	4	12	98.9479	75.8587	128.13	356.86	133.636	387.973
chrX:47057365:47057565:chrX:47053201-47058318;refseq_id=NM_153280;ensg_id=ENSG00000130985;gsymbol=UBA1;+:200:+	1.78068	0.672847	2.11801e-06	9.91693e-06	6	16	13	13	15	12	98.9479	242.748	151.427	515.464	501.136	387.973
chr12:122998421:122998621:chr12:122995656-122999275;refseq_id=NR_036435,NR_036436,NM_023012;ensg_id=ENSG00000111011;gsymbol=RSRC2;-:200:-	1.77728	-0.0211826	0.000107592	0.000376023	5	5	10	9	7	7	82.4565	75.8587	116.482	356.86	233.863	226.317
chr12:88524995:88525195:chr12:88524322-88530563;refseq_id=NM_025114;ensg_id=ENSG00000198707;gsymbol=CEP290;-:200:-	1.77461	2.2701	4.2962e-15	8.39109e-14	24	36	50	31	51	42	395.791	546.183	582.411	1229.18	1703.86	1357.9
chr7:102184144:102184344:chr7:102181948-102185223;refseq_id=NM_001097615,NM_001114403;ensg_id=ENSG00000168255,ENSG00000228049;gsymbol=POLR2J3,POLR2J2;-:200:-	1.75647	1.72312	8.95507e-11	9.41798e-10	12	24	41	24	28	33	197.896	364.122	477.577	951.626	935.454	1066.93
chr17:46652570:46652770:chr17:46651199-46667631;refseq_id=NA;ensg_id=ENSG00000120093;gsymbol=HOXB3;-:200:-	1.75616	0.545256	2.70004e-06	1.24209e-05	9	11	12	10	11	15	148.422	166.889	139.779	396.511	367.5	484.966
chr6:136597646:136597846:chr6:136596981-136599914;refseq_id=NM_001077440,NM_001077441,NM_014739;ensg_id=ENSG00000029363;gsymbol=BCLAF1;-:200:-	1.75403	1.64537	5.22144e-09	3.9748e-08	16	28	28	26	20	34	263.861	424.809	326.15	1030.93	668.181	1099.26
chr11:102954055:102954255:chr11:102937188-102962944;refseq_id=NM_032299;ensg_id=ENSG00000137692;gsymbol=DCUN1D5;-:200:-	1.74958	1.14435	2.33395e-07	1.29504e-06	13	23	14	19	15	22	214.387	348.95	163.075	753.37	501.136	711.284
chr6:30676134:30676334:chr6:30675161-30679281;refseq_id=NM_014641;ensg_id=ENSG00000137337;gsymbol=MDC1;-:200:-	1.74249	0.234468	6.77593e-05	0.000246647	9	9	7	6	10	12	148.422	136.546	81.5376	237.906	334.091	387.973
chr6:131197915:131198115:chr6:131191468-131199390;refseq_id=NM_001431,NM_001135554,NM_001199389,NM_001252660,NM_001199388,NM_001135555;ensg_id=ENSG00000079819;gsymbol=EPB41L2;-:200:-	1.74139	1.39363	5.13267e-09	3.92152e-08	17	14	30	22	18	27	280.352	212.404	349.447	872.324	601.363	872.939
chr9:115178920:115179120:chr9:115171187-115181238;refseq_id=NM_032303,NR_036651,NM_001195822;ensg_id=ENSG00000119471;gsymbol=HSDL2;+:200:+	1.73629	-0.101532	0.00471358	0.0109301	6	6	7	10	2	9	98.9479	91.0305	81.5376	396.511	66.8181	290.98
chr3:142562151:142562351:chr3:142561766-142567314;refseq_id=NM_013363;ensg_id=ENSG00000163710;gsymbol=PCOLCE2;-:200:-	1.72614	0.595256	0.000149791	0.000505415	5	14	15	14	17	6	82.4565	212.404	174.723	555.115	567.954	193.986
chr12:49719083:49719283:chr12:49717387-49719667;refseq_id=NM_005480;ensg_id=ENSG00000135451;gsymbol=TROAP;+:200:+	1.72592	0.491081	0.00055729	0.00163084	14	6	11	15	5	14	230.878	91.0305	128.13	594.766	167.045	452.635
chr3:57857162:57857362:chr3:57850969-57875827;refseq_id=NM_007159;ensg_id=ENSG00000163681;gsymbol=SLMAP;+:200:+	1.72052	0.558122	6.76361e-06	2.90063e-05	7	10	16	13	9	14	115.439	151.717	186.372	515.464	300.682	452.635
chr9:21859101:21859301:chr9:21854630-21931646;refseq_id=NR_102424,NM_001256497,NM_001278290,NM_002451;ensg_id=ENSG00000099810,ENSG00000264545;gsymbol=MTAP,RP11-145E5.5;+:200:+	1.71727	0.483737	2.14366e-05	8.39292e-05	11	7	13	7	13	14	181.404	106.202	151.427	277.557	434.318	452.635
chr12:57935155:57935355:chr12:57932302-57939879;refseq_id=NM_006400;ensg_id=ENSG00000175203;gsymbol=DCTN2;-:200:-	1.71678	-0.103061	0.000611954	0.0017681	8	4	7	6	10	5	131.93	60.687	81.5376	237.906	334.091	161.655
chr5:32586274:32586474:chr5:32585605-32588690;refseq_id=NM_006713;ensg_id=ENSG00000113387;gsymbol=SUB1;+:200:+	1.71126	0.108151	0.000405317	0.00123694	4	9	10	11	9	5	65.9652	136.546	116.482	436.162	300.682	161.655
chr11:47786914:47787114:chr11:47776080-47788993;refseq_id=NA;ensg_id=ENSG00000109920;gsymbol=FNBP4;-:200:-	1.70867	0.0036071	0.000392966	0.00120247	7	4	10	6	10	7	115.439	60.687	116.482	237.906	334.091	226.317
chr2:242274627:242274736:chr2:242274541-242275513;refseq_id=NM_001008491,NM_006155,NM_004404,NM_001008492;ensg_id=ENSG00000168385;gsymbol=SEPT2;+:109:+	1.70695	1.40788	2.02875e-09	1.64709e-08	16	22	24	20	21	26	263.861	333.778	279.557	793.021	701.59	840.608
chr8:97272475:97272675:chr8:97270585-97273796;refseq_id=NM_015942;ensg_id=ENSG00000156469;gsymbol=MTERFD1;-:200:-	1.70416	0.0576015	0.000158705	0.000533387	6	7	9	6	8	10	98.9479	106.202	104.834	237.906	267.272	323.311
chr1:154192413:154192613:chr1:154186933-154193273;refseq_id=NA;ensg_id=NA;gsymbol=NA;-:200:-	1.70385	0.0599197	0.000417008	0.00126136	7	7	8	7	6	11	115.439	106.202	93.1858	277.557	200.454	355.642
chr16:2013257:2013457:chr16:2012737-2014366;refseq_id=NM_002952;ensg_id=ENSG00000140988;gsymbol=RPS2;-:200:-	1.70044	2.06118	2.96699e-13	4.56809e-12	30	27	41	35	34	36	494.739	409.637	477.577	1387.79	1135.91	1163.92
chr19:41811380:41811580:chr19:41809877-41813811;refseq_id=NA;ensg_id=NA;gsymbol=NA;+:200:+	1.69153	0.24667	7.56365e-05	0.000271768	8	4	14	7	9	12	131.93	60.687	163.075	277.557	300.682	387.973
chr3:32778701:32778901:chr3:32776292-32801063;refseq_id=NM_015442,NM_001256741,NR_046352,NM_001256742;ensg_id=ENSG00000182973;gsymbol=CNOT10;+:200:+	1.68492	-0.138709	0.0052747	0.0120353	3	6	10	7	2	11	49.4739	91.0305	116.482	277.557	66.8181	355.642
chr2:201724938:201725138:chr2:201724403-201726189;refseq_id=NM_004071,NR_027855,NR_027856,NM_001162407;ensg_id=ENSG00000013441;gsymbol=CLK1;-:200:-	1.67149	1.66307	3.44779e-09	2.70288e-08	26	22	27	29	22	28	428.774	333.778	314.502	1149.88	734.999	905.27
chr7:122026363:122026563:chr7:122019422-122027227;refseq_id=NM_001009571,NM_001167940,NM_017954;ensg_id=ENSG00000081803;gsymbol=CADPS2;-:200:-	1.66756	0.304185	0.000339545	0.00105794	11	11	5	6	11	12	181.404	166.889	58.2411	237.906	367.5	387.973
chr3:9471310:9471510:chr3:9470507-9475246;refseq_id=NM_001080517;ensg_id=ENSG00000168137;gsymbol=SETD5;+:200:+	1.65744	1.98607	6.90371e-10	6.06604e-09	32	21	42	24	32	43	527.722	318.607	489.225	951.626	1069.09	1390.24
chr12:124091946:124092146:chr12:124090620-124093376;refseq_id=NM_020936;ensg_id=ENSG00000111364;gsymbol=DDX55;+:200:+	1.65708	0.783864	8.06779e-06	3.4213e-05	10	15	15	9	14	19	164.913	227.576	174.723	356.86	467.727	614.29
chr17:73204431:73204631:chr17:73201815-73206080;refseq_id=NM_024844;ensg_id=ENSG00000125450;gsymbol=NUP85;+:200:+	1.65552	1.76685	1.92634e-10	1.93086e-09	15	31	36	27	28	30	247.37	470.324	419.336	1070.58	935.454	969.932
chr11:47195033:47195233:chr11:47193832-47196649;refseq_id=NM_001242832,NM_032389;ensg_id=ENSG00000149182;gsymbol=ARFGAP2;-:200:-	1.64881	-0.133641	0.00123748	0.00335159	7	5	7	6	5	9	115.439	75.8587	81.5376	237.906	167.045	290.98
chr17:46989995:46990195:chr17:46988170-46993549;refseq_id=NM_023079;ensg_id=ENSG00000159202;gsymbol=UBE2Z;+:200:+	1.64787	-0.190375	0.00216696	0.0054783	5	9	4	6	8	5	82.4565	136.546	46.5929	237.906	267.272	161.655
chr3:58479679:58479879:chr3:58477823-58484509;refseq_id=NA;ensg_id=NA;gsymbol=NA;+:200:+	1.64698	-0.0783278	0.000950522	0.00264352	6	6	8	5	7	9	98.9479	91.0305	93.1858	198.255	233.863	290.98
chr5:148897440:148897640:chr5:148892633-148899951;refseq_id=NM_001271742,NM_001025105,NM_001892,NM_001271741;ensg_id=ENSG00000113712;gsymbol=CSNK1A1;-:200:-	1.64567	-0.0208209	0.00102325	0.00282054	8	5	8	9	9	4	131.93	75.8587	93.1858	356.86	300.682	129.324
chr17:79527655:79527855:chr17:79523913-79532633;refseq_id=NM_017921;ensg_id=ENSG00000182446;gsymbol=NPLOC4;-:200:-	1.64323	0.0301665	0.000250428	0.000802969	7	6	9	6	8	9	115.439	91.0305	104.834	237.906	267.272	290.98
chr5:180668563:180668763:chr5:180666487-180669345;refseq_id=NM_006098;ensg_id=ENSG00000204628;gsymbol=GNB2L1;-:200:-	1.64208	0.970959	1.32703e-06	6.4797e-06	9	12	26	17	13	18	148.422	182.061	302.854	674.068	434.318	581.959
chr4:41259037:41259131:chr4:41258928-41259754;refseq_id=NM_004181;ensg_id=ENSG00000154277;gsymbol=UCHL1;+:94:+	1.63622	0.270669	0.000115692	0.000399027	9	6	12	7	10	11	148.422	91.0305	139.779	277.557	334.091	355.642
chr3:9490963:9491163:chr3:9490072-9495552;refseq_id=NM_001080517;ensg_id=ENSG00000168137;gsymbol=SETD5;+:200:+	1.636	0.133306	0.00184988	0.00475764	12	2	10	7	6	12	197.896	30.3435	116.482	277.557	200.454	387.973
chr19:36235593:36235793:chr19:36235224-36236113;refseq_id=NM_024660,NM_144987,NM_001040425;ensg_id=ENSG00000267120,ENSG00000161265;gsymbol=AD000671.6,U2AF1L4;-:200:-	1.63516	0.314309	4.80911e-05	0.000178863	9	6	13	8	9	12	148.422	91.0305	151.427	317.209	300.682	387.973
chr20:45914570:45914770:chr20:45912315-45916028;refseq_id=NM_183048,NM_183047,NM_012408;ensg_id=ENSG00000101040;gsymbol=ZMYND8;-:200:-	1.61677	0.139505	0.00177616	0.00458183	8	12	4	6	7	12	131.93	182.061	46.5929	237.906	233.863	387.973
chr1:154241637:154241837:chr1:154241233-154243329;refseq_id=NM_001127320,NM_014847;ensg_id=ENSG00000143569;gsymbol=UBAP2L;+:200:+	1.59968	1.71551	3.72728e-10	3.49037e-09	21	22	38	21	32	28	346.317	333.778	442.632	832.672	1069.09	905.27
chr17:7477383:7477583:chr17:7476144-7477996;refseq_id=NM_001416,NM_001204510;ensg_id=ENSG00000161960,ENSG00000264772,ENSG00000265500;gsymbol=EIF4A1,RP11-186B7.4,SENP3-EIF4A1;+:200:+	1.59681	1.27037	2.52622e-06	1.17e-05	21	20	17	12	19	28	346.317	303.435	198.02	475.813	634.772	905.27
chr2:135703258:135703458:chr2:135700182-135703716;refseq_id=NM_001241,NM_058241;ensg_id=ENSG00000082258;gsymbol=CCNT2;+:200:+	1.58996	0.878716	4.56374e-06	2.005e-05	11	19	14	14	14	16	181.404	288.263	163.075	555.115	467.727	517.297
chr19:44733685:44733885:chr19:44732599-44741421;refseq_id=NM_182490;ensg_id=ENSG00000131115;gsymbol=ZNF227;+:200:+	1.58897	1.43338	4.7821e-08	3.01017e-07	15	18	34	22	18	26	247.37	273.091	396.04	872.324	601.363	840.608
chr1:182824511:182824711:chr1:182823165-182825713;refseq_id=NR_033302,NM_001357;ensg_id=ENSG00000135829;gsymbol=DHX9;+:200:+	1.58858	0.613943	5.67813e-05	0.000209362	12	11	13	14	14	8	197.896	166.889	151.427	555.115	467.727	258.649
chr20:43560782:43560982:chr20:43559101-43561826;refseq_id=NM_001124756;ensg_id=ENSG00000101104;gsymbol=PABPC1L;+:200:+	1.5885	0.532573	2.35767e-05	9.1263e-05	10	7	17	10	14	10	164.913	106.202	198.02	396.511	467.727	323.311
chr11:62566047:62566247:chr11:62564790-62567958;refseq_id=NM_001081491,NM_006362;ensg_id=ENSG00000162231;gsymbol=NXF1;-:200:-	1.58692	0.420221	0.000140469	0.00047537	12	6	13	9	8	14	197.896	91.0305	151.427	356.86	267.272	452.635
chr1:67405735:67405868:chr1:67405711-67411978;refseq_id=NM_001146113,NM_001077702,NM_001146111,NM_001077703,NM_001077704,NM_020948,NM_001146110,NM_001146112,NM_001077700,NM_001278215,NM_001077701;ensg_id=ENSG00000198160;gsymbol=MIER1;+:133:+	1.58237	0.34334	0.000594486	0.00172346	10	11	8	13	7	9	164.913	166.889	93.1858	515.464	233.863	290.98
chr12:69222350:69222550:chr12:69218335-69229764;refseq_id=NM_002392,NM_001258244;ensg_id=ENSG00000135679;gsymbol=MDM2;+:200:+	1.58097	2.18399	5.98901e-11	6.45755e-10	26	43	43	26	42	43	428.774	652.385	500.874	1030.93	1403.18	1390.24
chr12:54361178:54361378:chr12:54360060-54362540;refseq_id=NR_003716,NM_001276504,NM_001276503;ensg_id=ENSG00000228630;gsymbol=HOTAIR;-:200:-	1.58079	0.0506856	0.000542275	0.00159372	3	9	11	7	9	7	49.4739	136.546	128.13	277.557	300.682	226.317
chr7:99081161:99081361:chr7:99077284-99081766;refseq_id=NM_213603;ensg_id=ENSG00000198556;gsymbol=ZNF789;+:200:+	1.58067	0.0563661	0.000542275	0.00159372	6	9	8	8	8	7	98.9479	136.546	93.1858	317.209	267.272	226.317
chr3:23364805:23365005:chr3:23258753-23541231;refseq_id=NM_152653;ensg_id=ENSG00000182247;gsymbol=UBE2E2;+:200:+	1.57976	0.0519024	0.00104592	0.00287146	6	7	10	4	11	8	98.9479	106.202	116.482	158.604	367.5	258.649
chr2:242592521:242592721:chr2:242591299-242593025;refseq_id=NM_178326,NM_013325;ensg_id=ENSG00000168397;gsymbol=ATG4B;+:200:+	1.57849	-0.0518561	0.000950522	0.00264352	9	3	9	6	7	8	148.422	45.5152	104.834	237.906	233.863	258.649
chr7:43751048:43751248:chr7:43688199-43769083;refseq_id=NM_030883,NM_018224;ensg_id=ENSG00000106603;gsymbol=COA1;-:200:-	1.57583	0.00411453	0.00312152	0.00755085	8	6	8	6	4	12	131.93	91.0305	93.1858	237.906	133.636	387.973
chr15:72543295:72543495:chr15:72542361-72543596;refseq_id=NM_020214,NM_001258272,NM_001271876;ensg_id=ENSG00000137817;gsymbol=PARP6;-:200:-	1.57327	0.376127	0.000827807	0.00232859	8	10	12	5	17	8	131.93	151.717	139.779	198.255	567.954	258.649
chr7:44839822:44840022:chr7:44839301-44842716;refseq_id=NM_021130;ensg_id=ENSG00000196262;gsymbol=PPIA;+:200:+	1.54703	0.555024	3.00923e-05	0.000115051	12	9	14	11	11	12	197.896	136.546	163.075	436.162	367.5	387.973
chr1:97271774:97271974:chr1:97270356-97272514;refseq_id=NM_021190;ensg_id=ENSG00000117569;gsymbol=PTBP2;+:200:+	1.54636	2.49261	6.83078e-13	1.01511e-11	45	38	57	37	43	55	742.109	576.526	663.949	1467.09	1436.59	1778.21
chr5:151171405:151171605:chr5:151170450-151175136;refseq_id=NM_005754,NM_198395;ensg_id=ENSG00000145907;gsymbol=G3BP1;+:200:+	1.54238	0.43966	0.000262327	0.000834854	9	11	12	10	7	14	148.422	166.889	139.779	396.511	233.863	452.635
chr12:51451657:51451857:chr12:51450133-51454207;refseq_id=NA;ensg_id=ENSG00000050426;gsymbol=LETMD1;+:200:+	1.53211	0.225303	0.000815614	0.00230014	8	9	10	11	10	5	131.93	136.546	116.482	436.162	334.091	161.655
chr3:183703166:183703366:chr3:183701541-183705705;refseq_id=NM_005688,NM_001023587;ensg_id=ENSG00000114770;gsymbol=ABCC5;-:200:-	1.52679	0.120005	0.0043431	0.0101537	6	5	14	2	12	10	98.9479	75.8587	163.075	79.3021	400.909	323.311
chr15:72543298:72543498:chr15:72542361-72543596;refseq_id=NM_020214,NM_001258272,NM_001271876;ensg_id=ENSG00000137817;gsymbol=PARP6;-:200:-	1.5249	0.395774	0.00136205	0.00361957	9	10	12	5	17	8	148.422	151.717	139.779	198.255	567.954	258.649
chr2:242275189:242275389:chr2:242274541-242276931;refseq_id=NM_001008491,NM_006155,NM_004404,NM_001008492;ensg_id=ENSG00000168385;gsymbol=SEPT2;+:200:+	1.52284	1.88917	7.38774e-09	5.50137e-08	31	31	31	21	31	37	511.231	470.324	361.095	832.672	1035.68	1196.25
chr11:113702711:113702911:chr11:113701589-113704279;refseq_id=NM_020886;ensg_id=ENSG00000048028;gsymbol=USP28;-:200:-	1.52199	-0.0219854	0.00783172	0.0169102	7	8	7	10	2	9	115.439	121.374	81.5376	396.511	66.8181	290.98
chr11:113702715:113702915:chr11:113701589-113704279;refseq_id=NM_020886;ensg_id=ENSG00000048028;gsymbol=USP28;-:200:-	1.52198	-0.0219854	0.00780272	0.0168796	7	8	7	10	2	9	115.439	121.374	81.5376	396.511	66.8181	290.98
chr2:85583524:85583724:chr2:85582678-85584375;refseq_id=NM_001135022,NM_001135023,NM_001135021,NM_032213;ensg_id=ENSG00000115459;gsymbol=ELMOD3;+:200:+	1.52068	0.0796053	0.00110106	0.00300834	9	6	9	6	7	10	148.422	91.0305	104.834	237.906	233.863	323.311
chr3:23852750:23852950:chr3:23848728-23929190;refseq_id=NM_003341,NM_182666;ensg_id=ENSG00000170142;gsymbol=UBE2E1;+:200:+	1.51759	0.709497	9.58495e-05	0.000337398	11	12	17	9	10	19	181.404	182.061	198.02	356.86	334.091	614.29
chr8:103270652:103270852:chr8:103269860-103271357;refseq_id=NM_015902;ensg_id=ENSG00000104517;gsymbol=UBR5;-:200:-	1.511	0.566259	0.00646913	0.0144425	10	9	17	5	5	24	164.913	136.546	198.02	198.255	167.045	775.946
chrX:135960123:135960323:chrX:135958662-135961282;refseq_id=NM_001164803,NR_028477,NM_002139;ensg_id=ENSG00000147274;gsymbol=RBMX;-:200:-	1.50173	0.148615	0.00318145	0.00767951	6	7	13	12	4	8	98.9479	106.202	151.427	475.813	133.636	258.649
chr12:53858343:53858543:chr12:53856277-53861077;refseq_id=NM_001128912,NM_001128914,NM_005016,NM_031989,NM_001128911,NM_001128913,NM_001098620;ensg_id=ENSG00000197111,ENSG00000257379;gsymbol=PCBP2,RP11-793H13.8;+:200:+	1.50115	0.497155	0.000110413	0.000384063	8	14	12	11	11	10	131.93	212.404	139.779	436.162	367.5	323.311
chr12:51399460:51399660:chr12:51399094-51402407;refseq_id=NM_001174127,NM_001174126,NM_001174125,NM_001174130,NM_001174129,NM_001174128,NM_000617;ensg_id=ENSG00000110911;gsymbol=SLC11A2;-:200:-	1.49867	-0.199671	0.00396068	0.00932984	4	7	8	6	7	5	65.9652	106.202	93.1858	237.906	233.863	161.655
chr19:49993288:49993488:chr19:49993107-49993833;refseq_id=NM_001270491,NR_102763;ensg_id=ENSG00000142541;gsymbol=RPL13A;+:200:+	1.49683	0.649944	0.000190137	0.000629126	4	14	21	12	10	14	65.9652	212.404	244.613	475.813	334.091	452.635
chr5:180670405:180670605:chr5:180669174-180670906;refseq_id=NM_006098;ensg_id=ENSG00000204628;gsymbol=GNB2L1;-:200:-	1.48922	0.142854	0.00145104	0.00381805	2	9	15	8	6	10	32.9826	136.546	174.723	317.209	200.454	323.311
chrX:71840751:71840951:chrX:71839064-71843125;refseq_id=NM_001172436,NM_002637,NM_001122670;ensg_id=ENSG00000067177;gsymbol=PHKA1;-:200:-	1.48897	0.454921	0.000813512	0.0022961	11	9	13	5	15	11	181.404	136.546	151.427	198.255	501.136	355.642
chr20:34317473:34317673:chr20:34317234-34320057;refseq_id=NM_184234,NM_004902,NM_001242600,NM_001242599,NR_040724,NR_040722;ensg_id=ENSG00000131051;gsymbol=RBM39;-:200:-	1.48313	1.71781	7.62376e-08	4.59577e-07	29	16	40	27	27	24	478.248	242.748	465.929	1070.58	902.045	775.946
chr1:155649799:155649999:chr1:155649200-155650247;refseq_id=NM_001198901,NM_139118,NM_001198906,NM_139121,NM_018253,NM_001198905,NM_001198900,NM_001198902,NM_139119,NM_001198899,NM_001198904,NM_001198903;ensg_id=ENSG00000163374;gsymbol=YY1AP1;-:200:-	1.47873	0.241815	0.000543339	0.00159411	7	8	13	9	9	8	115.439	121.374	151.427	356.86	300.682	258.649
chr16:21968355:21968555:chr16:21964609-21968887;refseq_id=NM_003366;ensg_id=ENSG00000140740;gsymbol=UQCRC2;+:200:+	1.47517	0.192281	0.00067888	0.0019369	6	6	15	9	9	7	98.9479	91.0305	174.723	356.86	300.682	226.317
chr6:42848398:42848598:chr6:42847671-42851352;refseq_id=NM_198486;ensg_id=ENSG00000146223;gsymbol=RPL7L1;+:200:+	1.4687	0.150237	0.00141887	0.00374495	10	5	11	6	8	10	164.913	75.8587	128.13	237.906	267.272	323.311
chr2:135703156:135703356:chr2:135700182-135703716;refseq_id=NM_001241,NM_058241;ensg_id=ENSG00000082258;gsymbol=CCNT2;+:200:+	1.4646	0.932732	4.30193e-05	0.000161228	13	20	15	15	12	17	214.387	303.435	174.723	594.766	400.909	549.628
chr19:49121134:49121334:chr19:49120573-49122433;refseq_id=NM_001261443,NM_000979,NM_001277333;ensg_id=ENSG00000063177;gsymbol=RPL18;-:200:-	1.46271	0.0968319	0.00275178	0.00677447	6	7	12	3	9	11	98.9479	106.202	139.779	118.953	300.682	355.642
chr8:17105618:17105818:chr8:17104401-17125881;refseq_id=NM_152415,NM_001145152;ensg_id=ENSG00000155975;gsymbol=VPS37A;+:200:+	1.46052	0.0688575	0.00812101	0.0174906	5	5	15	11	3	8	82.4565	75.8587	174.723	436.162	100.227	258.649
chr7:99951317:99951517:chr7:99950833-99952863;refseq_id=NM_178238;ensg_id=ENSG00000121716;gsymbol=PILRB;+:200:+	1.45825	-0.0111125	0.002753	0.00677447	4	4	15	5	8	8	65.9652	60.687	174.723	198.255	267.272	258.649
chr2:242275173:242275373:chr2:242274541-242276931;refseq_id=NM_001008491,NM_006155,NM_004404,NM_001008492;ensg_id=ENSG00000168385;gsymbol=SEPT2;+:200:+	1.45693	1.88352	7.31867e-08	4.4432e-07	31	33	31	20	30	37	511.231	500.668	361.095	793.021	1002.27	1196.25
chr19:36708823:36709023:chr19:36705504-36719721;refseq_id=NM_007145,NM_001099639,NM_001099638;ensg_id=ENSG00000167635;gsymbol=ZNF146;+:200:+	1.45213	0.635709	0.00327438	0.00789269	13	7	19	9	5	21	214.387	106.202	221.316	356.86	167.045	678.952
chr5:178044435:178044635:chr5:178043883-178045779;refseq_id=NM_020666;ensg_id=ENSG00000113240;gsymbol=CLK4;-:200:-	1.44687	0.913614	0.000206765	0.000680197	14	15	19	18	8	17	230.878	227.576	221.316	713.719	267.272	549.628
chr15:101827907:101828107:chr15:101827113-101835460;refseq_id=NA;ensg_id=ENSG00000131876;gsymbol=SNRPA1;-:200:-	1.42728	0.881471	5.07967e-05	0.000188311	14	16	17	9	18	15	230.878	242.748	198.02	356.86	601.363	484.966
chr20:30155242:30155442:chr20:30154013-30157370;refseq_id=NM_178581,NM_030789,NM_178580;ensg_id=ENSG00000101294;gsymbol=HM13;+:200:+	1.41448	0.823157	0.000182553	0.000605792	14	16	15	13	19	8	230.878	242.748	174.723	515.464	634.772	258.649
chr19:37345151:37345351:chr19:37342732-37383936;refseq_id=NA;ensg_id=ENSG00000251247;gsymbol=ZNF345;+:200:+	1.41281	0.396729	0.00675942	0.0150219	8	15	9	4	8	17	131.93	227.576	104.834	158.604	267.272	549.628
chr11:32610357:32610557:chr11:32610140-32611187;refseq_id=NM_006360;ensg_id=ENSG00000149100;gsymbol=EIF3M;+:200:+	1.41082	-0.035147	0.00731644	0.01601	5	5	13	8	3	9	82.4565	75.8587	151.427	317.209	100.227	290.98
chr11:10828928:10829128:chr11:10828367-10830177;refseq_id=NM_001418,NM_001042559;ensg_id=ENSG00000110321;gsymbol=EIF4G2;-:200:-	1.40862	0.509351	0.0060574	0.0136212	10	10	16	14	3	14	164.913	151.717	186.372	555.115	100.227	452.635
chr1:31479949:31480149:chr1:31454159-31501711;refseq_id=NM_001020658,NM_014676;ensg_id=ENSG00000134644;gsymbol=PUM1;-:200:-	1.40822	0.119946	0.00224294	0.00564119	7	6	13	6	11	6	115.439	91.0305	151.427	237.906	367.5	193.986
chr6:99365595:99365795:chr6:99353302-99374936;refseq_id=NM_012160;ensg_id=ENSG00000112234;gsymbol=FBXL4;-:200:-	1.40777	0.127702	0.00211017	0.00534264	10	7	9	8	6	9	164.913	106.202	104.834	317.209	200.454	290.98
chr2:228217029:228217229:chr2:228205008-228220477;refseq_id=NR_047499,NM_001277062,NM_001277064,NM_001277065,NM_001256304,NM_001105519,NM_001277061,NM_001277063,NM_001134693,NM_020194;ensg_id=ENSG00000168958;gsymbol=MFF;+:200:+	1.39963	0.0730665	0.00165878	0.00432143	6	8	11	8	8	6	98.9479	121.374	128.13	317.209	267.272	193.986
chr19:50431105:50431305:chr19:50410084-50432988;refseq_id=NM_012346,NM_001193357,NM_153719,NM_016553,NM_153718;ensg_id=ENSG00000213024;gsymbol=NUP62;-:200:-	1.39951	0.0755785	0.00311743	0.0075463	7	9	9	6	7	9	115.439	136.546	104.834	237.906	233.863	290.98
chr17:7477377:7477577:chr17:7476144-7478576;refseq_id=NM_001416,NM_001204510;ensg_id=ENSG00000161960,ENSG00000264772,ENSG00000265500;gsymbol=EIF4A1,RP11-186B7.4,SENP3-EIF4A1;+:200:+	1.39579	1.1205	0.000347838	0.00108083	20	19	17	7	17	26	329.826	288.263	198.02	277.557	567.954	840.608
chr7:141441348:141441548:chr7:141438924-141442029;refseq_id=NM_001320,NM_003143,NM_001256513,NM_021221;ensg_id=ENSG00000106028;gsymbol=SSBP1;+:200:+	1.38974	2.05081	7.70019e-07	3.95184e-06	31	38	41	20	30	46	511.231	576.526	477.577	793.021	1002.27	1487.23
chr10:70516082:70516282:chr10:70515127-70517134;refseq_id=NM_018237;ensg_id=ENSG00000060339;gsymbol=CCAR1;+:200:+	1.38964	2.55909	6.74822e-11	7.23054e-10	37	47	74	47	46	42	610.178	713.072	861.969	1863.6	1536.82	1357.9
chr1:156307580:156307780:chr1:156305618-156308206;refseq_id=NM_005998,NR_036565,NM_001008800;ensg_id=ENSG00000163468;gsymbol=CCT3;-:200:-	1.38358	2.5265	4.80091e-08	3.01646e-07	56	34	63	36	40	56	923.513	515.839	733.838	1427.44	1336.36	1810.54
chr5:68669456:68669656:chr5:68667861-68670538;refseq_id=NM_133343,NM_133344,NM_133338,NM_133342,NM_133339,NM_133340,NM_133341,NM_002873;ensg_id=ENSG00000152942;gsymbol=RAD17;+:200:+	1.38285	0.334714	0.00272108	0.00671528	10	12	9	10	5	12	164.913	182.061	104.834	396.511	167.045	387.973
chr12:56226454:56226654:chr12:56225041-56227325;refseq_id=NA;ensg_id=ENSG00000182796;gsymbol=TMEM198B;+:200:+	1.38235	0.502467	0.000527929	0.00156095	6	11	19	11	9	11	98.9479	166.889	221.316	436.162	300.682	355.642
chr15:89788786:89788986:chr15:89788426-89790962;refseq_id=NM_018193,NM_001113378;ensg_id=ENSG00000140525;gsymbol=FANCI;+:200:+	1.38183	0.28813	0.00138906	0.00367762	10	9	11	11	9	6	164.913	136.546	128.13	436.162	300.682	193.986
chr15:78834717:78834917:chr15:78834519-78836609;refseq_id=NM_002789,NM_001102667,NM_001102668;ensg_id=ENSG00000041357;gsymbol=PSMA4;+:200:+	1.37983	0.503575	0.00148279	0.00389262	7	12	17	6	9	16	115.439	182.061	198.02	237.906	300.682	517.297
chr2:232573223:232573423:chr2:232572340-232576129;refseq_id=NA;ensg_id=ENSG00000187514;gsymbol=PTMA;+:200:+	1.37699	0.768473	0.000207856	0.000682472	11	16	17	7	15	16	181.404	242.748	198.02	277.557	501.136	517.297
chr12:120637953:120638153:chr12:120637113-120638634;refseq_id=NM_001002,NM_053275;ensg_id=ENSG00000089157;gsymbol=RPLP0;-:200:-	1.3754	0.74002	0.000109784	0.00038251	13	15	15	11	15	11	214.387	227.576	174.723	436.162	501.136	355.642
chr15:78834624:78834824:chr15:78834519-78836609;refseq_id=NM_002789,NM_001102667,NM_001102668;ensg_id=ENSG00000041357;gsymbol=PSMA4;+:200:+	1.3674	0.873274	6.8566e-05	0.000249318	10	17	21	10	14	17	164.913	257.92	244.613	396.511	467.727	549.628
chrX:128718120:128718320:chrX:128710294-128721095;refseq_id=NM_001587,NM_000276;ensg_id=ENSG00000122126;gsymbol=OCRL;+:200:+	1.36406	0.667107	0.000122902	0.000419659	14	8	19	9	13	13	230.878	121.374	221.316	356.86	434.318	420.304
chr2:210867961:210868161:chr2:210867352-210880836;refseq_id=NM_001278283,NM_001265598,NM_199229,NM_006916,NM_001278285,NM_001278286,NM_001270938,NM_001278282;ensg_id=ENSG00000197713;gsymbol=RPE;+:200:+	1.36282	1.17096	7.1814e-06	3.06825e-05	17	16	27	15	20	16	280.352	242.748	314.502	594.766	668.181	517.297
chr6:86277295:86277495:chr6:86275050-86281933;refseq_id=NM_020468,NM_153816;ensg_id=ENSG00000135317,ENSG00000135316;gsymbol=SNX14,SYNCRIP;-:200:-	1.36239	0.972181	4.61837e-05	0.000172709	13	13	26	15	12	17	214.387	197.233	302.854	594.766	400.909	549.628
chr2:176975910:176976110:chr2:176973518-176984670;refseq_id=NA;ensg_id=NA;gsymbol=NA;+:200:+	1.3607	1.77649	1.92798e-06	9.10197e-06	32	34	25	26	23	29	527.722	515.839	291.206	1030.93	768.408	937.601
chr11:122931383:122931583:chr11:122930824-122932037;refseq_id=NM_153201,NM_006597;ensg_id=ENSG00000109971;gsymbol=HSPA8;-:200:-	1.35989	0.519506	0.00210956	0.00534264	14	15	7	9	10	12	230.878	227.576	81.5376	356.86	334.091	387.973
chr17:79530594:79530794:chr17:79523913-79532633;refseq_id=NM_017921;ensg_id=ENSG00000182446;gsymbol=NPLOC4;-:200:-	1.35922	0.333467	0.0079349	0.0171113	10	13	8	4	9	14	164.913	197.233	93.1858	158.604	300.682	452.635
chr12:70723002:70723202:chr12:70704675-70726626;refseq_id=NM_014515,NM_001199302,NR_037615,NM_001199303;ensg_id=ENSG00000111596;gsymbol=CNOT2;+:200:+	1.35695	1.1204	3.22511e-05	0.000122755	11	22	25	14	14	21	181.404	333.778	291.206	555.115	467.727	678.952
chr22:42339705:42339905:chr22:42334741-42341308;refseq_id=NM_024053,NM_001002876;ensg_id=ENSG00000100162;gsymbol=CENPM;-:200:-	1.35673	-0.139803	0.0118307	0.0240421	8	6	7	6	4	8	131.93	91.0305	81.5376	237.906	133.636	258.649
chr2:17934331:17934531:chr2:17927094-17935096;refseq_id=NM_024624;ensg_id=ENSG00000163029;gsymbol=SMC6;-:200:-	1.35397	0.639572	0.000577963	0.00168269	12	15	13	12	14	8	197.896	227.576	151.427	475.813	467.727	258.649
chr10:74804809:74805009:chr10:74803645-74806859;refseq_id=NM_001142596,NM_000917,NM_001142595,NM_001017962;ensg_id=ENSG00000122884;gsymbol=P4HA1;-:200:-	1.34952	0.561432	0.00083942	0.00235561	10	11	17	10	7	15	164.913	166.889	198.02	396.511	233.863	484.966
chr1:153614518:153614718:chr1:153610771-153618782;refseq_id=NM_001244664,NM_001206612,NM_015607;ensg_id=ENSG00000160679;gsymbol=CHTOP;+:200:+	1.34669	1.0909	0.000111544	0.000387062	13	18	26	8	20	20	214.387	273.091	302.854	317.209	668.181	646.621
chr1:153614521:153614721:chr1:153610771-153618782;refseq_id=NM_001244664,NM_001206612,NM_015607;ensg_id=ENSG00000160679;gsymbol=CHTOP;+:200:+	1.34668	1.0909	0.000113077	0.00039119	13	18	26	8	20	20	214.387	273.091	302.854	317.209	668.181	646.621
chr2:217364354:217364554:chr2:217363993-217364754;refseq_id=NM_000998;ensg_id=ENSG00000197756;gsymbol=RPL37A;+:200:+	1.34412	0.0999859	0.00311743	0.0075463	9	8	9	6	7	9	148.422	121.374	104.834	237.906	233.863	290.98
chr5:38949529:38949729:chr5:38947366-38950822;refseq_id=NM_152756;ensg_id=ENSG00000164327;gsymbol=RICTOR;-:200:-	1.34342	0.0976018	0.00485741	0.0112104	9	7	10	4	10	8	148.422	106.202	116.482	158.604	334.091	258.649
chr10:71922515:71922715:chr10:71921614-71930285;refseq_id=NA;ensg_id=NA;gsymbol=NA;-:200:-	1.34311	0.565818	0.000365048	0.00112871	11	14	13	9	12	11	181.404	212.404	151.427	356.86	400.909	355.642
chr5:118844939:118845124:chr5:118844836-118850741;refseq_id=NM_000414,NM_001199292,NM_001199291;ensg_id=ENSG00000133835;gsymbol=HSD17B4;+:185:+	1.34076	0.351981	0.00403114	0.00948276	11	10	11	9	5	13	181.404	151.717	128.13	356.86	167.045	420.304
chr1:146638197:146638397:chr1:146634019-146638518;refseq_id=NM_005399;ensg_id=ENSG00000131791;gsymbol=PRKAB2;-:200:-	1.33969	0.102074	0.00766098	0.0166467	7	12	7	6	6	10	115.439	182.061	81.5376	237.906	200.454	323.311
chr2:38974272:38974472:chr2:38973836-38975299;refseq_id=NM_001031684,NM_001195446;ensg_id=ENSG00000115875;gsymbol=SRSF7;-:200:-	1.33871	0.754769	0.000398038	0.0012169	17	11	16	9	12	16	280.352	166.889	186.372	356.86	400.909	517.297
chr16:3740986:3741186:chr16:3739056-3767598;refseq_id=NM_016292,NM_001272049;ensg_id=ENSG00000126602;gsymbol=TRAP1;-:200:-	1.33856	0.64073	0.00100568	0.00277878	8	10	23	9	17	8	131.93	151.717	267.909	356.86	567.954	258.649
chr7:104909316:104909516:chr7:104844075-105029149;refseq_id=NM_182692;ensg_id=ENSG00000135250;gsymbol=SRPK2;-:200:-	1.33697	-0.00815663	0.00948194	0.019883	6	6	12	9	8	3	98.9479	91.0305	139.779	356.86	267.272	96.9932
chr2:242263656:242263823:chr2:242263631-242265528;refseq_id=NM_001008491,NM_006155,NM_004404,NM_001008492;ensg_id=ENSG00000168385;gsymbol=SEPT2;+:167:+	1.33462	0.855098	0.000119898	0.000411872	8	18	22	11	13	16	131.93	273.091	256.261	436.162	434.318	517.297
chr14:104153217:104153417:chr14:104145721-104158762;refseq_id=NM_182923,NM_001130107;ensg_id=ENSG00000126214;gsymbol=KLC1;+:200:+	1.33454	0.303063	0.00102975	0.00283389	7	11	13	6	10	10	115.439	166.889	151.427	237.906	334.091	323.311
chr16:24804593:24804793:chr16:24800553-24806040;refseq_id=NM_014494;ensg_id=ENSG00000090905;gsymbol=TNRC6A;+:200:+	1.32979	1.23996	8.58243e-06	3.61711e-05	13	22	29	18	17	18	214.387	333.778	337.798	713.719	567.954	581.959
chr16:2317219:2317419:chr16:2314574-2318413;refseq_id=NM_080594;ensg_id=ENSG00000205937;gsymbol=RNPS1;-:200:-	1.32521	0.986503	8.50348e-05	0.000302444	16	14	23	10	20	14	263.861	212.404	267.909	396.511	668.181	452.635
chr11:43347856:43348056:chr11:43344980-43349428;refseq_id=NM_001142930,NM_006595,NR_024625,NM_001142931,NM_001243747;ensg_id=ENSG00000166181;gsymbol=API5;+:200:+	1.32492	0.258142	0.0022156	0.00558063	7	9	14	8	8	9	115.439	136.546	163.075	317.209	267.272	290.98
chr1:10166054:10166254:chr1:10165574-10177658;refseq_id=NM_001105562,NM_006048;ensg_id=ENSG00000130939;gsymbol=UBE4B;+:200:+	1.31514	0.164314	0.00530446	0.0120952	4	10	14	8	5	10	65.9652	151.717	163.075	317.209	167.045	323.311
chr12:46369517:46369717:chr12:46357890-46384401;refseq_id=NM_004719;ensg_id=ENSG00000139218;gsymbol=SCAF11;-:200:-	1.31453	-0.00223002	0.0170484	0.0326634	5	12	7	6	4	10	82.4565	182.061	81.5376	237.906	133.636	323.311
chr11:118888255:118888455:chr11:118886551-118888763;refseq_id=NM_001028;ensg_id=ENSG00000118181;gsymbol=RPS25;-:200:-	1.31276	2.02599	2.09642e-06	9.8293e-06	30	37	45	27	44	21	494.739	561.355	524.17	1070.58	1470	678.952
chr1:151397537:151397737:chr1:151396425-151400517;refseq_id=NM_207171,NM_015100,NM_001194937,NM_001194938,NM_145796;ensg_id=ENSG00000143442;gsymbol=POGZ;-:200:-	1.30463	0.909168	0.000380821	0.00116844	17	16	17	14	9	18	280.352	242.748	198.02	555.115	300.682	581.959
chr7:33075600:33075800:chr7:33066429-33102409;refseq_id=NA;ensg_id=ENSG00000122643;gsymbol=NT5C3;-:200:-	1.30447	0.408362	0.00505812	0.0116265	9	12	13	8	15	5	148.422	182.061	151.427	317.209	501.136	161.655
chr19:37825870:37826070:chr19:37825580-37838218;refseq_id=NM_181786;ensg_id=ENSG00000181666;gsymbol=HKR1;+:200:+	1.30249	-0.0565216	0.0242369	0.04387	9	6	8	6	2	11	148.422	91.0305	93.1858	237.906	66.8181	355.642
chr17:49053262:49053462:chr17:49052132-49054582;refseq_id=NM_001251971,NM_001130528,NM_001130527,NM_003971;ensg_id=ENSG00000008294;gsymbol=SPAG9;-:200:-	1.29634	0.83838	0.000220283	0.000716392	11	15	22	9	13	17	181.404	227.576	256.261	356.86	434.318	549.628
chr1:78167156:78167356:chr1:78163548-78177540;refseq_id=NM_201626,NM_201624,NM_015017;ensg_id=ENSG00000077254;gsymbol=USP33;-:200:-	1.29104	0.11444	0.00311743	0.0075463	7	5	15	6	7	9	115.439	75.8587	174.723	237.906	233.863	290.98
chr5:140967817:140968017:chr5:140966609-140998622;refseq_id=NM_005219,NM_001079812;ensg_id=ENSG00000131504;gsymbol=DIAPH1;-:200:-	1.28964	0.323215	0.00186486	0.00478895	7	11	14	9	8	9	115.439	166.889	163.075	356.86	267.272	290.98
chr2:197663978:197664178:chr2:197662521-197664352;refseq_id=NM_012086,NM_001206774;ensg_id=ENSG00000119041;gsymbol=GTF3C3;-:200:-	1.2888	0.70664	0.00107761	0.00295133	13	18	12	9	11	15	214.387	273.091	139.779	356.86	367.5	484.966
chr6:109479602:109479802:chr6:109476994-109480305;refseq_id=NM_173830,NM_001083535,NM_001271853,NM_001271852;ensg_id=ENSG00000183137;gsymbol=CEP57L1;+:200:+	1.28388	0.185719	0.0113592	0.0233047	7	6	16	10	4	9	115.439	91.0305	186.372	396.511	133.636	290.98
chr12:51442595:51442795:chr12:51442082-51450285;refseq_id=NA;ensg_id=ENSG00000050426;gsymbol=LETMD1;+:200:+	1.28231	0.0630627	0.018706	0.0354025	5	7	14	2	10	9	82.4565	106.202	163.075	79.3021	334.091	290.98
chr14:23540395:23540595:chr14:23538685-23540779;refseq_id=NM_001164817,NM_001164816,NM_001164815,NM_014977,NM_001164814;ensg_id=ENSG00000100813;gsymbol=ACIN1;-:200:-	1.28025	2.01871	1.20344e-06	5.94415e-06	30	45	37	33	30	27	494.739	682.728	430.984	1308.49	1002.27	872.939
chr8:95839290:95839490:chr8:95837121-95840021;refseq_id=NM_017864,NR_073445,NR_073444;ensg_id=ENSG00000164941;gsymbol=INTS8;+:200:+	1.269	0.0751411	0.0139221	0.0277144	11	7	8	7	10	4	181.404	106.202	93.1858	277.557	334.091	129.324
chr14:58755531:58755731:chr14:58752309-58758425;refseq_id=NR_029434,NR_029435;ensg_id=ENSG00000257621,ENSG00000139971;gsymbol=RP11-349A22.5,C14orf37;-:200:-	1.26701	0.23903	0.00375445	0.00891161	9	10	11	10	9	5	148.422	151.717	128.13	396.511	300.682	161.655
chr5:180668639:180668839:chr5:180666487-180669345;refseq_id=NM_006098;ensg_id=ENSG00000204628;gsymbol=GNB2L1;-:200:-	1.26288	0.383154	0.00238572	0.00596516	7	11	16	10	7	10	115.439	166.889	186.372	396.511	233.863	323.311
chr6:76412160:76412360:chr6:76407141-76419346;refseq_id=NM_015571,NM_001100409;ensg_id=ENSG00000112701;gsymbol=SENP6;+:200:+	1.24395	0.385421	0.0143321	0.0283223	16	3	15	5	11	11	263.861	45.5152	174.723	198.255	367.5	355.642
chr2:38976315:38976515:chr2:38975721-38976847;refseq_id=NM_001031684,NM_001195446;ensg_id=ENSG00000115875;gsymbol=SRSF7;-:200:-	1.24349	2.79321	1.0616e-09	9.07133e-09	52	61	82	39	49	64	857.548	925.476	955.154	1546.39	1637.04	2069.19
chr12:57115243:57115443:chr12:57108386-57118307;refseq_id=NM_001113203,NM_001113202;ensg_id=ENSG00000196531;gsymbol=NACA;-:200:-	1.24295	0.934436	0.00114549	0.00311976	15	10	28	11	10	20	247.37	151.717	326.15	436.162	334.091	646.621
chr17:62894577:62894777:chr17:62888647-62914988;refseq_id=NM_199340;ensg_id=ENSG00000176809;gsymbol=LRRC37A3;-:200:-	1.24078	0.479639	0.00385768	0.00912495	9	11	17	5	10	14	148.422	166.889	198.02	198.255	334.091	452.635
chr1:234541226:234541426:chr1:234536927-234541845;refseq_id=NM_005646;ensg_id=ENSG00000059588;gsymbol=TARBP1;-:200:-	1.23941	0.0848947	0.00742914	0.0162151	5	5	17	7	6	8	82.4565	75.8587	198.02	277.557	200.454	258.649
chr6:30582379:30582579:chr6:30577615-30584775;refseq_id=NR_072994,NM_002714;ensg_id=ENSG00000204569;gsymbol=PPP1R10;-:200:-	1.23658	0.968469	0.000262321	0.000834854	11	20	23	15	15	12	181.404	303.435	267.909	594.766	501.136	387.973
chr16:2317238:2317438:chr16:2314574-2318413;refseq_id=NM_080594;ensg_id=ENSG00000205937;gsymbol=RNPS1;-:200:-	1.23233	0.968383	0.000246521	0.000793304	17	14	23	10	17	15	280.352	212.404	267.909	396.511	567.954	484.966
chr13:47289494:47289694:chr13:47286660-47297465;refseq_id=NM_001164213,NM_001164211,NM_015116;ensg_id=ENSG00000136141;gsymbol=LRCH1;+:200:+	1.22673	0.252203	0.00827546	0.0177673	9	6	16	7	12	5	148.422	91.0305	186.372	277.557	400.909	161.655
chr3:9495552:9495688:chr3:9495423-9506356;refseq_id=NM_001080517;ensg_id=ENSG00000168137;gsymbol=SETD5;+:136:+	1.22529	0.839533	0.000568095	0.0016582	14	16	19	10	18	10	230.878	242.748	221.316	396.511	601.363	323.311
chr14:58759856:58760056:chr14:58758353-58764855;refseq_id=NA;ensg_id=ENSG00000139971;gsymbol=C14orf37;-:200:-	1.22521	0.255852	0.00907957	0.0191923	6	12	13	7	5	12	98.9479	182.061	151.427	277.557	167.045	387.973
chr7:104719092:104719292:chr7:104717750-104722244;refseq_id=NM_182931,NM_018682,NM_006913;ensg_id=ENSG00000005483;gsymbol=MLL5;+:200:+	1.22431	0.0949904	0.0114327	0.0234274	8	9	10	6	7	8	131.93	136.546	116.482	237.906	233.863	258.649
chr2:228207260:228207460:chr2:228205008-228212100;refseq_id=NR_047499,NM_001277062,NM_001277064,NM_001277065,NM_001256304,NM_001105519,NM_001277061,NM_001277063,NM_001134693,NM_020194;ensg_id=ENSG00000168958;gsymbol=MFF;+:200:+	1.21559	1.25149	0.00261346	0.00648245	23	28	14	8	22	22	379.3	424.809	163.075	317.209	734.999	711.284
chr20:35399596:35399796:chr20:35399276-35399876;refseq_id=NM_001145318,NM_024918,NM_001145316,NM_001145317,NM_001145315;ensg_id=ENSG00000149636;gsymbol=DSN1;-:200:-	1.21455	1.29849	0.000130744	0.000444218	15	21	34	20	13	20	247.37	318.607	396.04	793.021	434.318	646.621
chr2:61441829:61442029:chr2:61438907-61447592;refseq_id=NM_014709;ensg_id=ENSG00000115464;gsymbol=USP34;-:200:-	1.21236	0.77002	0.000645159	0.00185372	8	16	23	10	14	12	131.93	242.748	267.909	396.511	467.727	387.973
chr11:47753771:47753971:chr11:47752926-47754222;refseq_id=NM_015308;ensg_id=ENSG00000109920;gsymbol=FNBP4;-:200:-	1.21207	0.675249	0.00718544	0.0157738	13	9	22	14	5	14	214.387	136.546	256.261	555.115	167.045	452.635
chr11:118888143:118888343:chr11:118886551-118888763;refseq_id=NM_001028;ensg_id=ENSG00000118181;gsymbol=RPS25;-:200:-	1.21154	2.05533	2.19546e-05	8.56629e-05	37	44	36	25	43	23	610.178	667.557	419.336	991.277	1436.59	743.615
chr16:2127398:2127598:chr16:2126492-2129197;refseq_id=NM_000548,NM_001114382,NM_001077183;ensg_id=ENSG00000103197;gsymbol=TSC2;+:200:+	1.21019	0.210146	0.0195072	0.0366551	11	5	14	6	5	12	181.404	75.8587	163.075	237.906	167.045	387.973
chr17:8113373:8113494:chr17:8111056-8113567;refseq_id=NM_004217,NM_001256834;ensg_id=ENSG00000178999;gsymbol=AURKB;-:121:-	1.20399	0.36074	0.00345723	0.00825772	7	12	15	7	8	11	115.439	182.061	174.723	277.557	267.272	355.642
chr9:95002973:95003137:chr9:94991283-95003243;refseq_id=NM_013417,NM_002161,NR_073446;ensg_id=ENSG00000196305;gsymbol=IARS;-:164:-	1.19368	0.260134	0.0245309	0.0443633	13	8	10	3	12	9	214.387	121.374	116.482	118.953	400.909	290.98
chr17:1446321:1446521:chr17:1444860-1451681;refseq_id=NM_006224;ensg_id=ENSG00000174238;gsymbol=PITPNA;-:200:-	1.1916	0.163245	0.0105171	0.0217731	6	10	13	9	7	6	98.9479	151.717	151.427	356.86	233.863	193.986
chr12:31242136:31242336:chr12:31241978-31243028;refseq_id=NM_030653,NM_001257145,NM_004399,NM_152438,NM_001257144;ensg_id=ENSG00000013573;gsymbol=DDX11;+:200:+	1.18967	1.49597	9.22904e-05	0.000325877	14	33	34	14	27	20	230.878	500.668	396.04	555.115	902.045	646.621
chr11:129762996:129763191:chr11:129762610-129763280;refseq_id=NM_001143835;ensg_id=ENSG00000170322;gsymbol=NFRKB;-:195:-	1.18829	0.927395	0.000562105	0.00164212	18	15	20	10	15	15	296.844	227.576	232.964	396.511	501.136	484.966
chr5:147806575:147806775:chr5:147805085-147813087;refseq_id=NM_030793,NM_001271723,NM_001256710;ensg_id=ENSG00000145868;gsymbol=FBXO38;+:200:+	1.18004	0.274038	0.00521161	0.0119152	8	8	16	9	6	9	131.93	121.374	186.372	356.86	200.454	290.98
chr1:9797612:9797812:chr1:9795943-9801314;refseq_id=NM_001009566,NM_014944;ensg_id=ENSG00000171603;gsymbol=CLSTN1;-:200:-	1.17554	0.588967	0.00877904	0.0186842	11	13	17	3	14	14	181.404	197.233	198.02	118.953	467.727	452.635
chr14:24035101:24035272:chr14:24034815-24035369;refseq_id=NM_003917;ensg_id=ENSG00000213983;gsymbol=AP1G2;-:171:-	1.17395	0.557691	0.00654357	0.0145801	16	8	16	8	7	15	263.861	121.374	186.372	317.209	233.863	484.966
chr12:19422921:19423121:chr12:19422704-19427917;refseq_id=NM_019012,NM_001256470,NR_073144,NM_001143821,NM_001256787;ensg_id=ENSG00000052126;gsymbol=PLEKHA5;+:200:+	1.1711	-0.0656933	0.0173859	0.0332541	5	8	11	7	7	4	82.4565	121.374	128.13	277.557	233.863	129.324
chr3:10328771:10328971:chr3:10327432-10329786;refseq_id=NA;ensg_id=NA;gsymbol=NA;+:200:+	1.16574	0.325256	0.0207406	0.0384184	13	10	10	5	14	6	214.387	151.717	116.482	198.255	467.727	193.986
chr16:21991667:21991867:chr16:21987488-21994668;refseq_id=NM_003366;ensg_id=ENSG00000140740;gsymbol=UQCRC2;+:200:+	1.15808	2.06701	0.000112624	0.00039002	28	35	61	21	24	45	461.757	531.011	710.542	832.672	801.817	1454.9
chrX:153628604:153628804:chrX:153628144-153630680;refseq_id=NM_006013,NM_001256577,NM_001243812,NM_001256580;ensg_id=ENSG00000147403;gsymbol=RPL10;+:200:+	1.1553	1.65258	1.29566e-05	5.28467e-05	28	30	33	20	24	23	461.757	455.152	384.391	793.021	801.817	743.615
chr22:29684394:29684594:chr22:29682912-29688158;refseq_id=NM_001163287,NM_013986,NM_005243,NM_001163285,NM_001163286;ensg_id=ENSG00000182944;gsymbol=EWSR1;+:200:+	1.15516	0.612467	0.00258583	0.00641856	14	14	14	9	12	10	230.878	212.404	163.075	356.86	400.909	323.311
chrX:153061182:153061382:chrX:153060129-153062007;refseq_id=NR_037927,NM_006280,NM_001204527,NM_001204526;ensg_id=ENSG00000180879;gsymbol=SSR4;+:200:+	1.14985	0.335914	0.00564345	0.0127998	5	13	16	7	8	10	82.4565	197.233	186.372	277.557	267.272	323.311
chr2:32108531:32108731:chr2:32094917-32117203;refseq_id=NM_015955,NM_001137602;ensg_id=ENSG00000162959,ENSG00000162961;gsymbol=MEMO1,DPY30;-:200:-	1.14487	0.569061	0.00818226	0.0176114	13	9	19	6	8	16	214.387	136.546	221.316	237.906	267.272	517.297
chr11:62620311:62620511:chr11:62619460-62620587;refseq_id=NA;ensg_id=ENSG00000255717;gsymbol=SNHG1;-:200:-	1.14457	3.56763	5.3461e-11	5.83801e-10	116	95	127	79	79	89	1912.99	1441.32	1479.32	3132.43	2639.32	2877.47
chr12:32859423:32859623:chr12:32854349-32860347;refseq_id=NM_012062,NM_012063,NM_005690;ensg_id=ENSG00000087470;gsymbol=DNM1L;+:200:+	1.14274	0.694664	0.00371449	0.00882902	17	11	17	7	14	12	280.352	166.889	198.02	277.557	467.727	387.973
chr17:42516083:42516283:chr17:42513846-42541912;refseq_id=NM_001002909;ensg_id=ENSG00000186566;gsymbol=GPATCH8;-:200:-	1.13798	0.298926	0.0135053	0.0269998	8	12	13	11	8	5	131.93	182.061	151.427	436.162	267.272	161.655
chr17:8110252:8110452:chr17:8109809-8110685;refseq_id=NM_004217,NM_001256834;ensg_id=ENSG00000178999;gsymbol=AURKB;-:200:-	1.13678	1.009	0.00127477	0.00343401	11	18	29	8	19	15	181.404	273.091	337.798	317.209	634.772	484.966
chr11:67375666:67375866:chr11:67374429-67376193;refseq_id=NM_001166102,NM_007103;ensg_id=ENSG00000167792;gsymbol=NDUFV1;+:200:+	1.13406	0.0136054	0.0207686	0.0384184	8	7	11	3	8	8	131.93	106.202	128.13	118.953	267.272	258.649
chr19:44733706:44733906:chr19:44732599-44741421;refseq_id=NM_182490;ensg_id=ENSG00000131115;gsymbol=ZNF227;+:200:+	1.12568	1.43706	0.00013	0.000442128	17	22	41	19	16	22	280.352	333.778	477.577	753.37	534.545	711.284
chr2:27806092:27806292:chr2:27805893-27821121;refseq_id=NA;ensg_id=NA;gsymbol=NA;+:200:+	1.118	0.253197	0.0106142	0.0219476	9	9	14	10	7	6	148.422	136.546	163.075	396.511	233.863	193.986
chrX:100354597:100354797:chrX:100353433-100356285;refseq_id=NM_006733;ensg_id=ENSG00000102384;gsymbol=CENPI;+:200:+	1.11051	0.409625	0.0158903	0.0307201	15	12	9	8	11	7	247.37	182.061	104.834	317.209	367.5	226.317
chr22:22142677:22142877:chr22:22127162-22143097;refseq_id=NM_002745,NM_138957;ensg_id=ENSG00000100030;gsymbol=MAPK1;-:200:-	1.10728	0.860028	0.00148196	0.00389262	11	18	23	12	11	14	181.404	273.091	267.909	475.813	367.5	452.635
chr1:46739137:46739295:chr1:46739027-46739888;refseq_id=NM_001142548,NM_003579;ensg_id=ENSG00000085999;gsymbol=RAD54L;+:158:+	1.10686	0.595095	0.00408921	0.00960612	15	14	13	10	9	11	247.37	212.404	151.427	396.511	300.682	355.642
chr4:20492225:20492425:chr4:20490442-20493522;refseq_id=NM_004787;ensg_id=ENSG00000145147;gsymbol=SLIT2;+:200:+	1.10248	2.76629	3.29868e-08	2.15581e-07	66	63	71	48	48	46	1088.43	955.82	827.024	1903.25	1603.63	1487.23
chr2:61412773:61412973:chr2:61412637-61413632;refseq_id=NM_152392;ensg_id=ENSG00000173209;gsymbol=AHSA2;+:200:+	1.09968	1.29834	0.000289493	0.000914498	25	18	29	15	18	18	412.283	273.091	337.798	594.766	601.363	581.959
chr20:57473795:57473995:chr20:57470667-57478640;refseq_id=NM_016592,NM_080425,NM_000516,NM_080426,NM_001077488,NM_001077489;ensg_id=ENSG00000087460;gsymbol=GNAS;+:200:+	1.08889	0.316347	0.0145703	0.0286709	10	10	14	5	9	10	164.913	151.717	163.075	198.255	300.682	323.311
chr12:131358378:131358578:chr12:131357548-131359278;refseq_id=NM_006325;ensg_id=ENSG00000132341;gsymbol=RAN;+:200:+	1.08882	0.318923	0.0148778	0.0291544	11	10	13	8	10	6	181.404	151.717	151.427	317.209	334.091	193.986
chr1:203765220:203765420:chr1:203764799-203770756;refseq_id=NA;ensg_id=ENSG00000058673;gsymbol=ZC3H11A;+:200:+	1.08442	0.414383	0.00954907	0.019987	9	10	18	6	9	11	148.422	151.717	209.668	237.906	300.682	355.642
chr17:38183718:38183918:chr17:38183109-38184199;refseq_id=NM_001267797,NM_014815,NR_052017,NM_001079518;ensg_id=ENSG00000008838;gsymbol=MED24;-:200:-	1.08351	1.48431	0.000444391	0.00133591	29	19	35	17	15	26	478.248	288.263	407.688	674.068	501.136	840.608
chr12:53691433:53691633:chr12:53689235-53691934;refseq_id=NM_002624,NM_145897;ensg_id=ENSG00000123349;gsymbol=PFDN5;+:200:+	1.0754	0.157745	0.0133785	0.0268199	6	10	14	6	6	9	98.9479	151.717	163.075	237.906	200.454	290.98
chrX:153995071:153995271:chrX:153994491-153995657;refseq_id=NM_001363,NM_001142463;ensg_id=ENSG00000130826;gsymbol=DKC1;+:200:+	1.06949	0.474912	0.00887356	0.0188384	11	10	18	10	6	11	181.404	151.717	209.668	396.511	200.454	355.642
chr6:2969147:2969347:chr6:2959402-2972399;refseq_id=NA;ensg_id=NA;gsymbol=NA;-:200:-	1.06533	0.382233	0.0135078	0.0269998	10	14	12	8	7	10	164.913	212.404	139.779	317.209	233.863	323.311
chr5:86704946:86705106:chr5:86703793-86705180;refseq_id=NM_001239,NM_001199189;ensg_id=ENSG00000134480;gsymbol=CCNH;-:160:-	1.06495	0.471934	0.00969068	0.0202586	11	9	19	6	9	12	181.404	136.546	221.316	237.906	300.682	387.973
chr14:23374868:23375068:chr14:23374545-23375577;refseq_id=NM_018107,NM_001077351,NM_001077352;ensg_id=ENSG00000100461;gsymbol=RBM23;-:200:-	1.06349	0.436737	0.0193271	0.0363767	9	12	17	12	5	9	148.422	182.061	198.02	475.813	167.045	290.98
chr17:2569109:2569309:chr17:2541393-2570492;refseq_id=NM_000430;ensg_id=ENSG00000007168;gsymbol=PAFAH1B1;+:200:+	1.06267	0.476968	0.00722581	0.0158421	14	9	16	7	10	10	230.878	136.546	186.372	277.557	334.091	323.311
chr10:99236720:99236920:chr10:99236440-99237173;refseq_id=NM_022362;ensg_id=ENSG00000155229;gsymbol=MMS19;-:200:-	1.0533	0.222877	0.0123246	0.0249558	6	9	17	7	6	9	98.9479	136.546	198.02	277.557	200.454	290.98
chr16:70584352:70584552:chr16:70582273-70588500;refseq_id=NM_012426;ensg_id=ENSG00000189091;gsymbol=SF3B3;+:200:+	1.05171	0.8851	0.00210495	0.0053413	16	13	25	9	14	14	263.861	197.233	291.206	356.86	467.727	452.635
chr1:236966527:236966727:chr1:236958581-236969533;refseq_id=NA;ensg_id=NA;gsymbol=NA;+:200:+	1.04766	0.95988	0.00229268	0.00574936	19	15	23	9	14	16	313.335	227.576	267.909	356.86	467.727	517.297
chr20:43561512:43561712:chr20:43559101-43564138;refseq_id=NM_001124756;ensg_id=ENSG00000101104;gsymbol=PABPC1L;+:200:+	1.04331	1.72484	0.000666635	0.00190834	38	26	35	18	18	32	626.67	394.465	407.688	713.719	601.363	1034.59
chr1:225974363:225974563:chr1:225971002-225978168;refseq_id=NM_003133,NM_001130440;ensg_id=ENSG00000143742;gsymbol=SRP9;+:200:+	1.04252	1.09386	0.0036203	0.00862913	23	15	25	14	20	9	379.3	227.576	291.206	555.115	668.181	290.98
chr11:62401847:62402047:chr11:62400917-62402472;refseq_id=NM_198335,NM_198334,NM_001278194,NM_001278192,NM_001278193;ensg_id=ENSG00000089597;gsymbol=GANAB;-:200:-	1.04239	0.867445	0.00698825	0.0154102	10	17	27	16	8	12	164.913	257.92	314.502	634.417	267.272	387.973
chr17:45235669:45235869:chr17:45234596-45247408;refseq_id=NM_001114091,NM_001256;ensg_id=ENSG00000004897;gsymbol=CDC27;-:200:-	1.04087	0.435822	0.0200382	0.0374128	12	10	16	4	9	13	197.896	151.717	186.372	158.604	300.682	420.304
chr2:190647849:190648049:chr2:190647148-190649097;refseq_id=NA;ensg_id=ENSG00000128699;gsymbol=ORMDL1;-:200:-	1.03924	0.623367	0.00735718	0.0160683	16	12	16	7	10	13	263.861	182.061	186.372	277.557	334.091	420.304
chr17:16342773:16342973:chr17:16342641-16343567;refseq_id=NR_027166,NR_027165,NR_045021,NR_027158,NR_027170,NR_045026,NR_045022,NR_045029,NR_027164,NR_027167,NR_027168,NR_027163,NR_027169,NR_027179,NR_027667,NR_045028,NR_027176,NR_027173,NR_027178,NR_027177,NR_027174,NR_027175,NR_027172,NR_045025,NR_045023;ensg_id=ENSG00000175061;gsymbol=C17orf76-AS1;+:200:+	1.0333	1.03291	0.00385028	0.00911385	17	14	30	13	19	9	280.352	212.404	349.447	515.464	634.772	290.98
chr20:43561497:43561697:chr20:43559101-43564138;refseq_id=NM_001124756;ensg_id=ENSG00000101104;gsymbol=PABPC1L;+:200:+	1.03247	1.96214	5.87266e-05	0.000215836	42	33	43	21	27	32	692.635	500.668	500.874	832.672	902.045	1034.59
chr12:30868437:30868637:chr12:30867893-30869610;refseq_id=NR_038177,NM_023925,NM_032156,NM_001002259,NM_001206856;ensg_id=ENSG00000110888;gsymbol=CAPRIN2;-:200:-	1.02846	1.16198	0.00331301	0.00796335	16	13	39	12	13	20	263.861	197.233	454.281	475.813	434.318	646.621
chr3:10328897:10329097:chr3:10327432-10329786;refseq_id=NA;ensg_id=NA;gsymbol=NA;+:200:+	1.02651	0.399224	0.0233141	0.0424321	15	7	15	9	10	6	247.37	106.202	174.723	356.86	334.091	193.986
chr2:65468982:65469182:chr2:65466986-65473873;refseq_id=NM_001005386,NM_005722;ensg_id=ENSG00000138071;gsymbol=ACTR2;+:200:+	1.02618	0.499431	0.0114443	0.0234372	13	15	12	7	10	10	214.387	227.576	139.779	277.557	334.091	323.311
chr12:53853914:53854114:chr12:53853056-53854927;refseq_id=NM_001128912,NM_001128914,NM_005016,NM_031989,NM_001128911,NM_001128913,NM_001098620;ensg_id=ENSG00000257379,ENSG00000197111;gsymbol=RP11-793H13.8,PCBP2;+:200:+	1.0204	0.631808	0.0077945	0.0168725	10	13	22	12	11	7	164.913	197.233	256.261	475.813	367.5	226.317
chr17:79223893:79224093:chr17:79220685-79225412;refseq_id=NM_001037984;ensg_id=ENSG00000157637;gsymbol=SLC38A10;-:200:-	1.01554	1.41931	0.000437252	0.00131793	23	25	33	18	16	20	379.3	379.294	384.391	713.719	534.545	646.621
[truncated: 2,402 more rows]

## Sheet: Supplemental_Table_7
Supplemental Table 7. Fold Change in SRSF1 crosslinking relative to 3' splice sites
[truncated: 2,191 more rows]

## Sheet: Supplemental_Table_8
Supplemental Table 8. Mapping statistics for repeat filter from this study and published U2AF2 iCLIP experiments.
[truncated: 252 more rows]

[truncated: 10 more sheets: Supplemental_Table_9, Supplemental_Table_10, Supplemental_Table_11, Supplemental_Table_12, Supplemental_Table_13, Supplemental_Table_14, Supplemental_Table_15, Supplemental_Table _16, Supplemental_Table_17, Supplemental Table 18]
